# Supplementary material
Source: publisher figshare collection journal article supplement (https://tandf.figshare.com/articles/dataset/_/6062987)
Supplement: Supplementary file 1 [file 2]

Archive with 7 entries (7 files):
- Exc.1 The detail information of all the differentially expressed proteins between each groups by General iTRAQ.xls
- Exc.2 The detail information of the 33 common differentially expressed proteins caused by storage time by General iTRAQ.xlsx
- Exc.3 The detail information of the 44 common differentially expressed proteins caused by storage temperature by General iTRAQ.xlsx
- Exc.4 The detail information of all the differentially expressed proteins between each groups by Phosphorylation iTRAQ.xls
- Exc.5 The detail information of the 13 common differentially expressed proteins caused by storage temperature by Phosphorylation iTRAQ.xls
- Supporting Information.docx
- Supporting Information20180410.pdf
