# Supplementary material
Source: publisher figshare collection journal article supplement (https://tandf.figshare.com/articles/dataset/_/6062987)
Supplement: Supplementary file 1 [file 2 › Exc.1 The detail information of all the differentially expressed proteins between each groups by General iTRAQ.xls]

## Sheet: B-A
ID	FoldChange	Log2FoldChange	Uniprot	Genename	Biological Process	Cell Component	Molecular Function	KEGG Pathways	UNIPROT_URL
Q13201	0.18335	-2.44733	Q13201	MMRN1	GO:0007599,hemostasis|GO:0006950,response to stress|GO:0007596,blood coagulation|GO:0032940,secretion by cell|GO:0044699,single-organism process|GO:0002576,platelet degranulation|GO:0006887,exocytosis|GO:0009611,response to wounding|GO:0065007,biological regulation|GO:0030168,platelet activation|GO:0006810,transport|GO:0022610,biological adhesion|GO:0032501,multicellular organismal process|GO:005…	GO:0031974,membrane-enclosed lumen|GO:0043229,intracellular organelle|GO:0060205,cytoplasmic membrane-bounded vesicle lumen|GO:0043227,membrane-bounded organelle|GO:0043226,organelle|GO:0005737,cytoplasm|GO:0031983,vesicle lumen|GO:0031982,vesicle|GO:0031093,platelet alpha granule lumen|GO:0016023,cytoplasmic membrane-bounded vesicle|GO:0031410,cytoplasmic vesicle|GO:0031988,membrane-bounded vesi…			http://www.uniprot.org/uniprot/Q13201
P02776	0.1894	-2.40049	P02776	PF4	GO:2001234,negative regulation of apoptotic signaling pathway|GO:2001236,regulation of extrinsic apoptotic signaling pathway|GO:2001237,negative regulation of extrinsic apoptotic signaling pathway|GO:0019220,regulation of phosphate metabolic process|GO:0019221,cytokine-mediated signaling pathway|GO:0019222,regulation of metabolic process|GO:2001233,regulation of apoptotic signaling pathway|GO:003…	GO:0031974,membrane-enclosed lumen|GO:0043229,intracellular organelle|GO:0060205,cytoplasmic membrane-bounded vesicle lumen|GO:0043227,membrane-bounded organelle|GO:0043226,organelle|GO:0005737,cytoplasm|GO:0031983,vesicle lumen|GO:0031982,vesicle|GO:0031093,platelet alpha granule lumen|GO:0016023,cytoplasmic membrane-bounded vesicle|GO:0031410,cytoplasmic vesicle|GO:0031988,membrane-bounded vesi…	GO:1901681,sulfur compound binding|GO:0043168,anion binding|GO:0042379,chemokine receptor binding|GO:0008009,chemokine activity|GO:0097367,carbohydrate derivative binding|GO:0005102,receptor binding|GO:0043167,ion binding|GO:0005539,glycosaminoglycan binding|GO:0005125,cytokine activity|GO:0048248,CXCR3 chemokine receptor binding|GO:0005488,binding|GO:0005515,protein binding|GO:0045236,CXCR chemo…	hsa04062,Chemokine signaling pathway|hsa04060,Cytokine-cytokine receptor interaction	http://www.uniprot.org/uniprot/P02776
P07996	0.20055	-2.31797	P07996	THBS1	GO:0006909,phagocytosis|GO:0051049,regulation of transport|GO:0001667,ameboidal-type cell migration|GO:0007596,blood coagulation|GO:0001501,skeletal system development|GO:0032026,response to magnesium ion|GO:0042035,regulation of cytokine biosynthetic process|GO:0044281,small molecule metabolic process|GO:0051641,cellular localization|GO:0007599,hemostasis|GO:0048266,behavioral response to pain|G…	GO:0009897,external side of plasma membrane|GO:0005783,endoplasmic reticulum|GO:0098552,side of membrane|GO:0005788,endoplasmic reticulum lumen|GO:0031012,extracellular matrix|GO:0043229,intracellular organelle|GO:0071944,cell periphery|GO:0060205,cytoplasmic membrane-bounded vesicle lumen|GO:0043227,membrane-bounded organelle|GO:0043226,organelle|GO:0005737,cytoplasm|GO:0031983,vesicle lumen|GO:…	GO:0050840,extracellular matrix binding|GO:0031406,carboxylic acid binding|GO:0019955,cytokine binding|GO:0044877,macromolecular complex binding|GO:0005488,binding|GO:0030169,low-density lipoprotein particle binding|GO:0016597,amino acid binding|GO:0043168,anion binding|GO:0001948,glycoprotein binding|GO:1901681,sulfur compound binding|GO:0043169,cation binding|GO:0005543,phospholipid binding|GO:…	hsa04350,TGF-beta signaling pathway|hsa05219,Bladder cancer|hsa05144,Malaria|hsa05205,Proteoglycans in cancer|hsa05206,MicroRNAs in cancer|hsa04115,p53 signaling pathway|hsa04015,Rap1 signaling pathway|hsa04145,Phagosome|hsa04510,Focal adhesion|hsa04512,ECM-receptor interaction|hsa04151,PI3K-Akt signaling pathway	http://www.uniprot.org/uniprot/P07996
P04275	0.209	-2.25843	P04275	VWF	GO:0022607,cellular component assembly|GO:0007599,hemostasis|GO:0070271,protein complex biogenesis|GO:0043933,macromolecular complex subunit organization|GO:0007597,blood coagulation, intrinsic pathway|GO:0007596,blood coagulation|GO:0032940,secretion by cell|GO:0071840,cellular component organization or biogenesis|GO:0044699,single-organism process|GO:0044710,single-organism metabolic process|GO…	GO:0005783,endoplasmic reticulum|GO:0044421,extracellular region part|GO:0031974,membrane-enclosed lumen|GO:0031012,extracellular matrix|GO:0043229,intracellular organelle|GO:0060205,cytoplasmic membrane-bounded vesicle lumen|GO:0030135,coated vesicle|GO:0043226,organelle|GO:0030136,clathrin-coated vesicle|GO:0005737,cytoplasm|GO:0031983,vesicle lumen|GO:0031982,vesicle|GO:0031093,platelet alpha …	GO:0001948,glycoprotein binding|GO:0005178,integrin binding|GO:0050839,cell adhesion molecule binding|GO:0005515,protein binding|GO:0047485,protein N-terminus binding|GO:0097367,carbohydrate derivative binding|GO:0051087,chaperone binding|GO:0019899,enzyme binding|GO:0019865,immunoglobulin binding|GO:0044877,macromolecular complex binding|GO:0005488,binding|GO:0002020,protease binding|GO:0032403,…	hsa04611,Platelet activation|hsa04512,ECM-receptor interaction|hsa04610,Complement and coagulation cascades|hsa04510,Focal adhesion|hsa04151,PI3K-Akt signaling pathway	http://www.uniprot.org/uniprot/P04275
P02675	0.2355	-2.0862	P02675	FGB	GO:2001234,negative regulation of apoptotic signaling pathway|GO:0034116,positive regulation of heterotypic cell-cell adhesion|GO:2001236,regulation of extrinsic apoptotic signaling pathway|GO:2001237,negative regulation of extrinsic apoptotic signaling pathway|GO:0019220,regulation of phosphate metabolic process|GO:0080090,regulation of primary metabolic process|GO:0019222,regulation of metaboli…	GO:0009897,external side of plasma membrane|GO:0098552,side of membrane|GO:0031974,membrane-enclosed lumen|GO:0043229,intracellular organelle|GO:0071944,cell periphery|GO:0060205,cytoplasmic membrane-bounded vesicle lumen|GO:0043227,membrane-bounded organelle|GO:0043226,organelle|GO:0005737,cytoplasm|GO:0031983,vesicle lumen|GO:0070062,extracellular exosome|GO:0031093,platelet alpha granule lumen…	GO:0030674,protein binding, bridging|GO:0051087,chaperone binding|GO:0005198,structural molecule activity|GO:0005488,binding|GO:0005515,protein binding|GO:0005102,receptor binding|GO:0050839,cell adhesion molecule binding|GO:0060090,binding, bridging	hsa04611,Platelet activation|hsa04610,Complement and coagulation cascades	http://www.uniprot.org/uniprot/P02675
P02679	0.3036	-1.71976	P02679	FGG	GO:2001234,negative regulation of apoptotic signaling pathway|GO:0034116,positive regulation of heterotypic cell-cell adhesion|GO:2001236,regulation of extrinsic apoptotic signaling pathway|GO:2001237,negative regulation of extrinsic apoptotic signaling pathway|GO:0019220,regulation of phosphate metabolic process|GO:0080090,regulation of primary metabolic process|GO:0019222,regulation of metaboli…	GO:0009897,external side of plasma membrane|GO:0098552,side of membrane|GO:0031974,membrane-enclosed lumen|GO:0043229,intracellular organelle|GO:0071944,cell periphery|GO:0060205,cytoplasmic membrane-bounded vesicle lumen|GO:0043227,membrane-bounded organelle|GO:0043226,organelle|GO:0005737,cytoplasm|GO:0031983,vesicle lumen|GO:0070062,extracellular exosome|GO:0031093,platelet alpha granule lumen…	GO:0043169,cation binding|GO:0030674,protein binding, bridging|GO:0050839,cell adhesion molecule binding|GO:0005198,structural molecule activity|GO:0043167,ion binding|GO:0005488,binding|GO:0005515,protein binding|GO:0005102,receptor binding|GO:0046872,metal ion binding|GO:0060090,binding, bridging	hsa04611,Platelet activation|hsa04610,Complement and coagulation cascades|hsa05150,Staphylococcus aureus infection	http://www.uniprot.org/uniprot/P02679
P02760	0.3147	-1.66795	P02760	AMBP	GO:0019220,regulation of phosphate metabolic process|GO:0080090,regulation of primary metabolic process|GO:0019222,regulation of metabolic process|GO:0048585,negative regulation of response to stimulus|GO:0048583,regulation of response to stimulus|GO:0006778,porphyrin-containing compound metabolic process|GO:0007165,signal transduction|GO:0023014,signal transduction by protein phosphorylation|GO:…	GO:0043229,intracellular organelle|GO:0071944,cell periphery|GO:0043227,membrane-bounded organelle|GO:0043226,organelle|GO:0031982,vesicle|GO:0016020,membrane|GO:0072562,blood microparticle|GO:0031988,membrane-bounded vesicle|GO:0009986,cell surface|GO:0005886,plasma membrane|GO:1903561,extracellular vesicle|GO:0005615,extracellular space|GO:0043230,extracellular organelle|GO:0043231,intracellula…	GO:0004866,endopeptidase inhibitor activity|GO:0044877,macromolecular complex binding|GO:0005488,binding|GO:0004857,enzyme inhibitor activity|GO:0098772,molecular function regulator|GO:1901363,heterocyclic compound binding|GO:0019855,calcium channel inhibitor activity|GO:0016248,channel inhibitor activity|GO:0032403,protein complex binding|GO:0030234,enzyme regulator activity|GO:0042802,identical…		http://www.uniprot.org/uniprot/P02760
P02671	0.3208	-1.64025	P02671	FGA	GO:2001234,negative regulation of apoptotic signaling pathway|GO:0034116,positive regulation of heterotypic cell-cell adhesion|GO:2001236,regulation of extrinsic apoptotic signaling pathway|GO:2001237,negative regulation of extrinsic apoptotic signaling pathway|GO:0019220,regulation of phosphate metabolic process|GO:0080090,regulation of primary metabolic process|GO:0019222,regulation of metaboli…	GO:0009897,external side of plasma membrane|GO:0005783,endoplasmic reticulum|GO:0098552,side of membrane|GO:0031974,membrane-enclosed lumen|GO:0043229,intracellular organelle|GO:0071944,cell periphery|GO:0060205,cytoplasmic membrane-bounded vesicle lumen|GO:0043227,membrane-bounded organelle|GO:0043226,organelle|GO:0005737,cytoplasm|GO:0031983,vesicle lumen|GO:0070062,extracellular exosome|GO:003…	GO:0030674,protein binding, bridging|GO:0005198,structural molecule activity|GO:0005488,binding|GO:0005515,protein binding|GO:0005102,receptor binding|GO:0050839,cell adhesion molecule binding|GO:0060090,binding, bridging	hsa04611,Platelet activation|hsa04610,Complement and coagulation cascades	http://www.uniprot.org/uniprot/P02671
B2RUZ4	0.3411	-1.55173	B2RUZ4	SMIM1		GO:0043230,extracellular organelle|GO:0031982,vesicle|GO:0044421,extracellular region part|GO:0043227,membrane-bounded organelle|GO:0016021,integral component of membrane|GO:0016020,membrane|GO:0031988,membrane-bounded vesicle|GO:0005576,extracellular region|GO:0044425,membrane part|GO:1903561,extracellular vesicle|GO:0065010,extracellular membrane-bounded organelle|GO:0043226,organelle|GO:003122…			http://www.uniprot.org/uniprot/B2RUZ4
P09486	0.36835	-1.44085	P09486	SPARC	GO:0001503,ossification|GO:0009628,response to abiotic stimulus|GO:0007599,hemostasis|GO:0007596,blood coagulation|GO:0050680,negative regulation of epithelial cell proliferation|GO:0001501,skeletal system development|GO:0072359,circulatory system development|GO:0072358,cardiovascular system development|GO:0007165,signal transduction|GO:0014074,response to purine-containing compound|GO:0044707,si…	GO:0044421,extracellular region part|GO:0005886,plasma membrane|GO:0031974,membrane-enclosed lumen|GO:0031012,extracellular matrix|GO:0030139,endocytic vesicle|GO:0043229,intracellular organelle|GO:0071944,cell periphery|GO:0060205,cytoplasmic membrane-bounded vesicle lumen|GO:0043227,membrane-bounded organelle|GO:0043226,organelle|GO:0034399,nuclear periphery|GO:0030667,secretory granule membran…	GO:0043169,cation binding|GO:0005518,collagen binding|GO:0050840,extracellular matrix binding|GO:0043167,ion binding|GO:0044877,macromolecular complex binding|GO:0005509,calcium ion binding|GO:0005515,protein binding|GO:0032403,protein complex binding|GO:0046872,metal ion binding|GO:0005488,binding		http://www.uniprot.org/uniprot/P09486
Q14766	0.3729	-1.42314	Q14766	LTBP1	GO:0033036,macromolecule localization|GO:0008104,protein localization|GO:0070887,cellular response to chemical stimulus|GO:0048585,negative regulation of response to stimulus|GO:0007167,enzyme linked receptor protein signaling pathway|GO:0048583,regulation of response to stimulus|GO:0070848,response to growth factor|GO:0023057,negative regulation of signaling|GO:0065007,biological regulation|GO:0…	GO:0043234,protein complex|GO:0043205,fibril|GO:0044421,extracellular region part|GO:0031012,extracellular matrix|GO:0032991,macromolecular complex|GO:0005576,extracellular region|GO:0001527,microfibril|GO:0044420,extracellular matrix component|GO:0005578,proteinaceous extracellular matrix	GO:0038023,signaling receptor activity|GO:0019955,cytokine binding|GO:0060089,molecular transducer activity|GO:0004872,receptor activity|GO:0004871,signal transducer activity|GO:0050436,microfibril binding|GO:0050431,transforming growth factor beta binding|GO:0043169,cation binding|GO:0019838,growth factor binding|GO:0043167,ion binding|GO:0004675,transmembrane receptor protein serine/threonine k…	hsa04350,TGF-beta signaling pathway	http://www.uniprot.org/uniprot/Q14766
P11277	0.3883	-1.36476	P11277	SPTB	GO:0048468,cell development|GO:0006778,porphyrin-containing compound metabolic process|GO:0006779,porphyrin-containing compound biosynthetic process|GO:0008064,regulation of actin polymerization or depolymerization|GO:0061024,membrane organization|GO:0007009,plasma membrane organization|GO:0030182,neuron differentiation|GO:0090066,regulation of anatomical structure size|GO:1901362,organic cyclic …	GO:0015629,actin cytoskeleton|GO:0009898,cytoplasmic side of plasma membrane|GO:0043229,intracellular organelle|GO:0043228,non-membrane-bounded organelle|GO:0098552,side of membrane|GO:0005622,intracellular|GO:0031226,intrinsic component of plasma membrane|GO:0043226,organelle|GO:0031224,intrinsic component of membrane|GO:0005856,cytoskeleton|GO:0016020,membrane|GO:0044430,cytoskeletal part|GO:00…	GO:0005200,structural constituent of cytoskeleton|GO:0008092,cytoskeletal protein binding|GO:0051015,actin filament binding|GO:0005198,structural molecule activity|GO:0003779,actin binding|GO:0044877,macromolecular complex binding|GO:0005488,binding|GO:0005515,protein binding|GO:0032403,protein complex binding|GO:0046983,protein dimerization activity|GO:0046982,protein heterodimerization activity…		http://www.uniprot.org/uniprot/P11277
P05067	0.4095	-1.28806	P05067	APP	GO:0007599,hemostasis|GO:0007596,blood coagulation|GO:0016358,dendrite development|GO:0044281,small molecule metabolic process|GO:0098771,inorganic ion homeostasis|GO:0051716,cellular response to stimulus|GO:0048589,developmental growth|GO:0018212,peptidyl-tyrosine modification|GO:0048468,cell development|GO:0045859,regulation of protein kinase activity|GO:0007528,neuromuscular junction developme…	GO:0005783,endoplasmic reticulum|GO:0031970,organelle envelope lumen|GO:0031974,membrane-enclosed lumen|GO:0031975,envelope|GO:0031594,neuromuscular junction|GO:0030054,cell junction|GO:0031984,organelle subcompartment|GO:0031983,vesicle lumen|GO:0031982,vesicle|GO:0016023,cytoplasmic membrane-bounded vesicle|GO:0016021,integral component of membrane|GO:0016020,membrane|GO:0031988,membrane-bounde…	GO:0030414,peptidase inhibitor activity|GO:0033130,acetylcholine receptor binding|GO:0019899,enzyme binding|GO:0008047,enzyme activator activity|GO:0003676,nucleic acid binding|GO:0003677,DNA binding|GO:0004857,enzyme inhibitor activity|GO:0098772,molecular function regulator|GO:1901363,heterocyclic compound binding|GO:1901681,sulfur compound binding|GO:0043169,cation binding|GO:0046914,transitio…	hsa05010,Alzheimer's disease|hsa04726,Serotonergic synapse	http://www.uniprot.org/uniprot/P05067
P12259	0.4132	-1.27509	P12259	F5	GO:0007599,hemostasis|GO:0006950,response to stress|GO:0007596,blood coagulation|GO:0032940,secretion by cell|GO:0003013,circulatory system process|GO:0051641,cellular localization|GO:0044699,single-organism process|GO:0002576,platelet degranulation|GO:0006887,exocytosis|GO:0009611,response to wounding|GO:0065007,biological regulation|GO:0030168,platelet activation|GO:0006810,transport|GO:0065008…	GO:0005886,plasma membrane|GO:0031974,membrane-enclosed lumen|GO:0043229,intracellular organelle|GO:0071944,cell periphery|GO:0060205,cytoplasmic membrane-bounded vesicle lumen|GO:0043227,membrane-bounded organelle|GO:0043226,organelle|GO:0005737,cytoplasm|GO:0031983,vesicle lumen|GO:0031982,vesicle|GO:0031093,platelet alpha granule lumen|GO:0016023,cytoplasmic membrane-bounded vesicle|GO:0031410…	GO:0043169,cation binding|GO:0005507,copper ion binding|GO:0046914,transition metal ion binding|GO:0043167,ion binding|GO:0005488,binding|GO:0005515,protein binding|GO:0046872,metal ion binding	hsa04610,Complement and coagulation cascades	http://www.uniprot.org/uniprot/P12259
P10909	0.41905	-1.25481	P10909	CLU	GO:0007599,hemostasis|GO:0007596,blood coagulation|GO:0019220,regulation of phosphate metabolic process|GO:0051716,cellular response to stimulus|GO:0019222,regulation of metabolic process|GO:0043207,response to external biotic stimulus|GO:0060548,negative regulation of cell death|GO:0045859,regulation of protein kinase activity|GO:0008366,axon ensheathment|GO:0046483,heterocycle metabolic process…	GO:0005783,endoplasmic reticulum|GO:0016234,inclusion body|GO:0031974,membrane-enclosed lumen|GO:0031012,extracellular matrix|GO:0043229,intracellular organelle|GO:1990777,lipoprotein particle|GO:0072562,blood microparticle|GO:0060205,cytoplasmic membrane-bounded vesicle lumen|GO:0005622,intracellular|GO:0043227,membrane-bounded organelle|GO:0043226,organelle|GO:0034358,plasma lipoprotein particl…	GO:0016787,hydrolase activity|GO:0016818,hydrolase activity, acting on acid anhydrides, in phosphorus-containing anhydrides|GO:0031625,ubiquitin protein ligase binding|GO:0044389,ubiquitin-like protein ligase binding|GO:0005515,protein binding|GO:0003824,catalytic activity|GO:0051087,chaperone binding|GO:0017111,nucleoside-triphosphatase activity|GO:0019899,enzyme binding|GO:0016817,hydrolase act…		http://www.uniprot.org/uniprot/P10909
Q9Y6C2	0.4247	-1.23548	Q9Y6C2	EMILIN1	GO:0009987,cellular process|GO:0016043,cellular component organization|GO:0030198,extracellular matrix organization|GO:0044763,single-organism cellular process|GO:0044699,single-organism process|GO:0043062,extracellular structure organization|GO:0007155,cell adhesion|GO:0022610,biological adhesion|GO:0071840,cellular component organization or biogenesis	GO:0043234,protein complex|GO:0043230,extracellular organelle|GO:0070062,extracellular exosome|GO:0044421,extracellular region part|GO:0043227,membrane-bounded organelle|GO:0031012,extracellular matrix|GO:0043226,organelle|GO:0032991,macromolecular complex|GO:0005576,extracellular region|GO:0005581,collagen trimer|GO:0031988,membrane-bounded vesicle|GO:1903561,extracellular vesicle|GO:0065010,ext…	GO:0005488,binding|GO:0005515,protein binding		http://www.uniprot.org/uniprot/Q9Y6C2
Q71U36	0.4272	-1.22702	Q71U36	TUBA1A	GO:0022607,cellular component assembly|GO:0006457,protein folding|GO:0044839,cell cycle G2/M phase transition|GO:0070271,protein complex biogenesis|GO:0000086,G2/M transition of mitotic cell cycle|GO:0006458,'de novo' protein folding|GO:1903047,mitotic cell cycle process|GO:0044770,cell cycle phase transition|GO:0044772,mitotic cell cycle phase transition|GO:0022402,cell cycle process|GO:0034622,…	GO:0035770,ribonucleoprotein granule|GO:0055037,recycling endosome|GO:0043229,intracellular organelle|GO:0043228,non-membrane-bounded organelle|GO:0036464,cytoplasmic ribonucleoprotein granule|GO:0030529,ribonucleoprotein complex|GO:0005874,microtubule|GO:0043226,organelle|GO:0005856,cytoskeleton|GO:0031982,vesicle|GO:0043209,myelin sheath|GO:0043227,membrane-bounded organelle|GO:0005634,nucleus|…	GO:0005200,structural constituent of cytoskeleton|GO:0035639,purine ribonucleoside triphosphate binding|GO:0005488,binding|GO:0005198,structural molecule activity|GO:1901363,heterocyclic compound binding|GO:1901265,nucleoside phosphate binding|GO:0001882,nucleoside binding|GO:0043168,anion binding|GO:0016462,pyrophosphatase activity|GO:0000166,nucleotide binding|GO:0032561,guanyl ribonucleotide b…	hsa05130,Pathogenic Escherichia coli infection|hsa04145,Phagosome|hsa04540,Gap junction	http://www.uniprot.org/uniprot/Q71U36
P10124	0.4275	-1.226	P10124	SRGN	GO:0006887,exocytosis|GO:0007599,hemostasis|GO:0051046,regulation of secretion|GO:0051048,negative regulation of secretion|GO:0051049,regulation of transport|GO:0007596,blood coagulation|GO:0001503,ossification|GO:0007165,signal transduction|GO:0030500,regulation of bone mineralization|GO:0030502,negative regulation of bone mineralization|GO:0051651,maintenance of location in cell|GO:0071840,cell…	GO:0000323,lytic vacuole|GO:0031974,membrane-enclosed lumen|GO:0043229,intracellular organelle|GO:0060205,cytoplasmic membrane-bounded vesicle lumen|GO:0005622,intracellular|GO:0043227,membrane-bounded organelle|GO:0043226,organelle|GO:0005737,cytoplasm|GO:0005764,lysosome|GO:0031983,vesicle lumen|GO:0031982,vesicle|GO:0031093,platelet alpha granule lumen|GO:0016023,cytoplasmic membrane-bounded v…	GO:0005488,binding|GO:0005515,protein binding|GO:0032403,protein complex binding|GO:0044877,macromolecular complex binding|GO:0005518,collagen binding		http://www.uniprot.org/uniprot/P10124
P40197	0.4294	-1.21961	P40197	GP5	GO:0032102,negative regulation of response to external stimulus|GO:0008152,metabolic process|GO:0032101,regulation of response to external stimulus|GO:0050865,regulation of cell activation|GO:0048585,negative regulation of response to stimulus|GO:0050866,negative regulation of cell activation|GO:0048583,regulation of response to stimulus|GO:0009611,response to wounding|GO:0007160,cell-matrix adhe…	GO:0071944,cell periphery|GO:0031226,intrinsic component of plasma membrane|GO:0043226,organelle|GO:0031224,intrinsic component of membrane|GO:0031982,vesicle|GO:0043227,membrane-bounded organelle|GO:0016021,integral component of membrane|GO:0016020,membrane|GO:0031988,membrane-bounded vesicle|GO:0044459,plasma membrane part|GO:0005887,integral component of plasma membrane|GO:0005886,plasma membr…	GO:0005488,binding|GO:0005515,protein binding|GO:0032403,protein complex binding|GO:0044877,macromolecular complex binding|GO:0005518,collagen binding	hsa04611,Platelet activation|hsa04512,ECM-receptor interaction|hsa04640,Hematopoietic cell lineage	http://www.uniprot.org/uniprot/P40197
P07225	0.46825	-1.09465	P07225	PROS1	GO:0006909,phagocytosis|GO:0080090,regulation of primary metabolic process|GO:0019222,regulation of metabolic process|GO:0051049,regulation of transport|GO:0048585,negative regulation of response to stimulus|GO:0048584,positive regulation of response to stimulus|GO:0048583,regulation of response to stimulus|GO:0007599,hemostasis|GO:0031347,regulation of defense response|GO:0044710,single-organism…	GO:0005783,endoplasmic reticulum|GO:0005886,plasma membrane|GO:0031974,membrane-enclosed lumen|GO:0005789,endoplasmic reticulum membrane|GO:0042175,nuclear outer membrane-endoplasmic reticulum membrane network|GO:0043229,intracellular organelle|GO:0071944,cell periphery|GO:0060205,cytoplasmic membrane-bounded vesicle lumen|GO:0005622,intracellular|GO:0043227,membrane-bounded organelle|GO:0043226,…	GO:0043169,cation binding|GO:0046872,metal ion binding|GO:0004866,endopeptidase inhibitor activity|GO:0005515,protein binding|GO:0061135,endopeptidase regulator activity|GO:0061134,peptidase regulator activity|GO:0043167,ion binding|GO:0044877,macromolecular complex binding|GO:0005509,calcium ion binding|GO:0030414,peptidase inhibitor activity|GO:0032403,protein complex binding|GO:0004857,enzyme …	hsa04610,Complement and coagulation cascades	http://www.uniprot.org/uniprot/P07225
Q9H3K6	0.51145	-0.967335	Q9H3K6	BOLA2		GO:0043230,extracellular organelle|GO:0031982,vesicle|GO:0044421,extracellular region part|GO:0043227,membrane-bounded organelle|GO:0031988,membrane-bounded vesicle|GO:0005576,extracellular region|GO:1903561,extracellular vesicle|GO:0065010,extracellular membrane-bounded organelle|GO:0043226,organelle|GO:0070062,extracellular exosome			http://www.uniprot.org/uniprot/Q9H3K6
Q8NG06	0.5131	-0.962688	Q8NG06	TRIM58	GO:0071704,organic substance metabolic process|GO:0044267,cellular protein metabolic process|GO:0044238,primary metabolic process|GO:0044260,cellular macromolecule metabolic process|GO:0032446,protein modification by small protein conjugation|GO:0019538,protein metabolic process|GO:0009987,cellular process|GO:0070647,protein modification by small protein conjugation or removal|GO:0006464,cellular…	GO:0044464,cell part|GO:0005623,cell|GO:0005622,intracellular	GO:0043169,cation binding|GO:0046914,transition metal ion binding|GO:0043167,ion binding|GO:0003824,catalytic activity|GO:0008270,zinc ion binding|GO:0046872,metal ion binding|GO:0016874,ligase activity|GO:0005488,binding		http://www.uniprot.org/uniprot/Q8NG06
P14543	0.5371	-0.896737	P14543	NID1	GO:0030155,regulation of cell adhesion|GO:0007160,cell-matrix adhesion|GO:0007275,multicellular organismal development|GO:0044699,single-organism process|GO:0045785,positive regulation of cell adhesion|GO:0001822,kidney development|GO:0016043,cellular component organization|GO:0050789,regulation of biological process|GO:0032836,glomerular basement membrane development|GO:0048513,organ development…	GO:0005605,basal lamina|GO:0005604,basement membrane|GO:0043230,extracellular organelle|GO:0070062,extracellular exosome|GO:0044421,extracellular region part|GO:0065010,extracellular membrane-bounded organelle|GO:0005576,extracellular region|GO:0044464,cell part|GO:0005623,cell|GO:0031012,extracellular matrix|GO:0043226,organelle|GO:0043227,membrane-bounded organelle|GO:0071944,cell periphery|GO:…	GO:0001948,glycoprotein binding|GO:0043169,cation binding|GO:0043236,laminin binding|GO:0043237,laminin-1 binding|GO:0050840,extracellular matrix binding|GO:0097367,carbohydrate derivative binding|GO:0043167,ion binding|GO:0046872,metal ion binding|GO:0043394,proteoglycan binding|GO:0044877,macromolecular complex binding|GO:0005509,calcium ion binding|GO:0005515,protein binding|GO:0032403,protein…		http://www.uniprot.org/uniprot/P14543
Q9Y608	0.5425	-0.882305	Q9Y608	LRRFIP2	GO:0044700,single organism signaling|GO:0051716,cellular response to stimulus|GO:0009987,cellular process|GO:0050896,response to stimulus|GO:0016055,Wnt signaling pathway|GO:0044763,single-organism cellular process|GO:0050794,regulation of cellular process|GO:0065007,biological regulation|GO:0023052,signaling|GO:0007165,signal transduction|GO:0007166,cell surface receptor signaling pathway|GO:000…		GO:0005488,binding|GO:0019904,protein domain specific binding|GO:0005515,protein binding|GO:0030275,LRR domain binding		http://www.uniprot.org/uniprot/Q9Y608
O43633	0.54925	-0.864465	O43633	CHMP2A	GO:0008104,protein localization|GO:0051046,regulation of secretion|GO:0051047,positive regulation of secretion|GO:0051049,regulation of transport|GO:0006900,membrane budding|GO:0061024,membrane organization|GO:0051656,establishment of organelle localization|GO:0071840,cellular component organization or biogenesis|GO:0007017,microtubule-based process|GO:0045786,negative regulation of cell cycle|GO…	GO:0016020,membrane|GO:0043229,intracellular organelle|GO:0030117,membrane coat|GO:0043227,membrane-bounded organelle|GO:0043226,organelle|GO:0010008,endosome membrane|GO:0005737,cytoplasm|GO:0031982,vesicle|GO:0098805,whole membrane|GO:0005770,late endosome|GO:0070062,extracellular exosome|GO:0031988,membrane-bounded vesicle|GO:0031902,late endosome membrane|GO:0048475,coated membrane|GO:0098588…	GO:0043168,anion binding|GO:0043169,cation binding|GO:0043178,alcohol binding|GO:0005543,phospholipid binding|GO:0008289,lipid binding|GO:0050997,quaternary ammonium group binding|GO:0043167,ion binding|GO:0070405,ammonium ion binding|GO:0031210,phosphatidylcholine binding|GO:0036094,small molecule binding|GO:0019904,protein domain specific binding|GO:0005515,protein binding|GO:0005488,binding	hsa04144,Endocytosis	http://www.uniprot.org/uniprot/O43633
Q14847	0.5588	-0.839596	Q14847	LASP1	GO:0048584,positive regulation of response to stimulus|GO:0048583,regulation of response to stimulus|GO:0023056,positive regulation of signaling|GO:0023052,signaling|GO:0007165,signal transduction|GO:0023051,regulation of signaling|GO:0010647,positive regulation of cell communication|GO:0010646,regulation of cell communication|GO:0050789,regulation of biological process|GO:0044699,single-organism…	GO:0015629,actin cytoskeleton|GO:0043229,intracellular organelle|GO:0043228,non-membrane-bounded organelle|GO:0005924,cell-substrate adherens junction|GO:0005925,focal adhesion|GO:0043227,membrane-bounded organelle|GO:0043226,organelle|GO:0030054,cell junction|GO:0030055,cell-substrate junction|GO:0005856,cytoskeleton|GO:0031982,vesicle|GO:0031988,membrane-bounded vesicle|GO:0044430,cytoskeletal …	GO:0008270,zinc ion binding|GO:0005070,SH3/SH2 adaptor activity|GO:0043169,cation binding|GO:0046914,transition metal ion binding|GO:0043167,ion binding|GO:0003779,actin binding|GO:0032403,protein complex binding|GO:0046872,metal ion binding|GO:0005215,transporter activity|GO:0051015,actin filament binding|GO:0060090,binding, bridging|GO:0022891,substrate-specific transmembrane transporter activi…		http://www.uniprot.org/uniprot/Q14847
Q27J81	0.56735	-0.817689	Q27J81	INF2	GO:0033043,regulation of organelle organization|GO:0000266,mitochondrial fission|GO:0030036,actin cytoskeleton organization|GO:0051128,regulation of cellular component organization|GO:0010821,regulation of mitochondrion organization|GO:0071840,cellular component organization or biogenesis|GO:0009653,anatomical structure morphogenesis|GO:0050789,regulation of biological process|GO:0044699,single-o…	GO:0005737,cytoplasm|GO:0005783,endoplasmic reticulum|GO:0005634,nucleus|GO:0044464,cell part|GO:0044444,cytoplasmic part|GO:0005623,cell|GO:0005622,intracellular|GO:0043229,intracellular organelle|GO:0012505,endomembrane system|GO:0044424,intracellular part|GO:0048471,perinuclear region of cytoplasm|GO:0043227,membrane-bounded organelle|GO:0043226,organelle|GO:0043231,intracellular membrane-boun…	GO:0008092,cytoskeletal protein binding|GO:0017048,Rho GTPase binding|GO:0017016,Ras GTPase binding|GO:0003779,actin binding|GO:0031267,small GTPase binding|GO:0051020,GTPase binding|GO:0019899,enzyme binding|GO:0005515,protein binding|GO:0005488,binding		http://www.uniprot.org/uniprot/Q27J81
P56202	0.56765	-0.816926	P56202	CTSW	GO:0044248,cellular catabolic process|GO:0044267,cellular protein metabolic process|GO:1901575,organic substance catabolic process|GO:0044265,cellular macromolecule catabolic process|GO:0044260,cellular macromolecule metabolic process|GO:0071704,organic substance metabolic process|GO:0006508,proteolysis|GO:0044238,primary metabolic process|GO:0009987,cellular process|GO:0030163,protein catabolic …	GO:0005737,cytoplasm|GO:0000323,lytic vacuole|GO:0043231,intracellular membrane-bounded organelle|GO:0005773,vacuole|GO:0016020,membrane|GO:0044464,cell part|GO:0044444,cytoplasmic part|GO:0005623,cell|GO:0005622,intracellular|GO:0005764,lysosome|GO:0044421,extracellular region part|GO:0043229,intracellular organelle|GO:0005576,extracellular region|GO:0044424,intracellular part|GO:0043227,membran…	GO:0016787,hydrolase activity|GO:0004175,endopeptidase activity|GO:0070011,peptidase activity, acting on L-amino acid peptides|GO:0003824,catalytic activity|GO:0004197,cysteine-type endopeptidase activity|GO:0008233,peptidase activity|GO:0008234,cysteine-type peptidase activity	hsa04142,Lysosome	http://www.uniprot.org/uniprot/P56202
P24844	0.5692	-0.812992	P24844	MYL9	GO:0050817,coagulation|GO:0006936,muscle contraction|GO:0044707,single-multicellular organism process|GO:0016337,single organismal cell-cell adhesion|GO:0007409,axonogenesis|GO:0030030,cell projection organization|GO:0031175,neuron projection development|GO:0048468,cell development|GO:0006928,movement of cell or subcellular component|GO:0007596,blood coagulation|GO:0003012,muscle system process|G…	GO:0032432,actin filament bundle|GO:0015629,actin cytoskeleton|GO:0030016,myofibril|GO:0030017,sarcomere|GO:0043229,intracellular organelle|GO:0043228,non-membrane-bounded organelle|GO:0044430,cytoskeletal part|GO:0043226,organelle|GO:0030018,Z disc|GO:0042641,actomyosin|GO:0005856,cytoskeleton|GO:0001725,stress fiber|GO:0031674,I band|GO:0005859,muscle myosin complex|GO:0016459,myosin complex|GO…	GO:0032036,myosin heavy chain binding|GO:0043169,cation binding|GO:0005198,structural molecule activity|GO:0008092,cytoskeletal protein binding|GO:0017022,myosin binding|GO:0043167,ion binding|GO:0008307,structural constituent of muscle|GO:0005509,calcium ion binding|GO:0005515,protein binding|GO:0046872,metal ion binding|GO:0005488,binding	hsa04022,cGMP-PKG signaling pathway|hsa04024,cAMP signaling pathway|hsa04530,Tight junction|hsa04670,Leukocyte transendothelial migration|hsa04510,Focal adhesion|hsa04810,Regulation of actin cytoskeleton|hsa04921,Oxytocin signaling pathway|hsa04270,Vascular smooth muscle contraction	http://www.uniprot.org/uniprot/P24844
Q9H4A6	0.5754	-0.797363	Q9H4A6	GOLPH3	GO:0008104,protein localization|GO:0051046,regulation of secretion|GO:0051047,positive regulation of secretion|GO:0051049,regulation of transport|GO:0048584,positive regulation of response to stimulus|GO:0048583,regulation of response to stimulus|GO:0006900,membrane budding|GO:0061024,membrane organization|GO:0007009,plasma membrane organization|GO:0007163,establishment or maintenance of cell pol…	GO:0031970,organelle envelope lumen|GO:0031974,membrane-enclosed lumen|GO:0031975,envelope|GO:0043229,intracellular organelle|GO:0071944,cell periphery|GO:0005622,intracellular|GO:0043227,membrane-bounded organelle|GO:0043226,organelle|GO:0005737,cytoplasm|GO:0031985,Golgi cisterna|GO:0031984,organelle subcompartment|GO:0031090,organelle membrane|GO:0031981,nuclear lumen|GO:0005634,nucleus|GO:001…	GO:0043168,anion binding|GO:0070273,phosphatidylinositol-4-phosphate binding|GO:0035091,phosphatidylinositol binding|GO:0005543,phospholipid binding|GO:0008289,lipid binding|GO:0019899,enzyme binding|GO:0043167,ion binding|GO:0005488,binding|GO:0005515,protein binding|GO:1901981,phosphatidylinositol phosphate binding	hsa05202,Transcriptional misregulation in cancer	http://www.uniprot.org/uniprot/Q9H4A6
P62328	0.57815	-0.790484	P62328	TMSB4X	GO:0006887,exocytosis|GO:0007599,hemostasis|GO:0033043,regulation of organelle organization|GO:0043933,macromolecular complex subunit organization|GO:0006810,transport|GO:0007596,blood coagulation|GO:0051129,negative regulation of cellular component organization|GO:0051128,regulation of cellular component organization|GO:0008064,regulation of actin polymerization or depolymerization|GO:0032940,se…	GO:0031974,membrane-enclosed lumen|GO:0043229,intracellular organelle|GO:0043228,non-membrane-bounded organelle|GO:0060205,cytoplasmic membrane-bounded vesicle lumen|GO:0043227,membrane-bounded organelle|GO:0043226,organelle|GO:0005856,cytoskeleton|GO:0031983,vesicle lumen|GO:0031982,vesicle|GO:0031093,platelet alpha granule lumen|GO:0016023,cytoplasmic membrane-bounded vesicle|GO:0031410,cytopla…	GO:0005488,binding|GO:0005515,protein binding|GO:0008092,cytoskeletal protein binding|GO:0097159,organic cyclic compound binding|GO:0044822,poly(A) RNA binding|GO:0003779,actin binding|GO:0003785,actin monomer binding|GO:0003676,nucleic acid binding|GO:1901363,heterocyclic compound binding|GO:0003723,RNA binding	hsa04810,Regulation of actin cytoskeleton	http://www.uniprot.org/uniprot/P62328
Q96FZ7	0.587	-0.768568	Q96FZ7	CHMP6	GO:0039702,viral budding via host ESCRT complex|GO:0051046,regulation of secretion|GO:0051049,regulation of transport|GO:0019068,virion assembly|GO:0006900,membrane budding|GO:1903047,mitotic cell cycle process|GO:0050000,chromosome localization|GO:1902589,single-organism organelle organization|GO:0032940,secretion by cell|GO:0022607,cellular component assembly|GO:0022402,cell cycle process|GO:19…	GO:0016020,membrane|GO:0043229,intracellular organelle|GO:0043227,membrane-bounded organelle|GO:0043226,organelle|GO:0010008,endosome membrane|GO:0005737,cytoplasm|GO:0031982,vesicle|GO:0098805,whole membrane|GO:0005770,late endosome|GO:0070062,extracellular exosome|GO:0031988,membrane-bounded vesicle|GO:0031902,late endosome membrane|GO:0098588,bounding membrane of organelle|GO:0012505,endomembr…	GO:0005515,protein binding|GO:0047485,protein N-terminus binding|GO:0005488,binding	hsa04144,Endocytosis	http://www.uniprot.org/uniprot/Q96FZ7
Q8TAT6	0.5871	-0.768322	Q8TAT6	NPLOC4	GO:0008104,protein localization|GO:1901362,organic cyclic compound biosynthetic process|GO:0071840,cellular component organization or biogenesis|GO:0044712,single-organism catabolic process|GO:0044710,single-organism metabolic process|GO:0044711,single-organism biosynthetic process|GO:0006301,postreplication repair|GO:0070727,cellular macromolecule localization|GO:0010256,endomembrane system orga…	GO:0005783,endoplasmic reticulum|GO:0031974,membrane-enclosed lumen|GO:0005789,endoplasmic reticulum membrane|GO:0042175,nuclear outer membrane-endoplasmic reticulum membrane network|GO:0043229,intracellular organelle|GO:0043227,membrane-bounded organelle|GO:0043226,organelle|GO:0005737,cytoplasm|GO:0031090,organelle membrane|GO:0031981,nuclear lumen|GO:0070013,intracellular organelle lumen|GO:00…	GO:0043169,cation binding|GO:0031625,ubiquitin protein ligase binding|GO:0044389,ubiquitin-like protein ligase binding|GO:0046914,transition metal ion binding|GO:0032182,ubiquitin-like protein binding|GO:0019899,enzyme binding|GO:0043167,ion binding|GO:0043130,ubiquitin binding|GO:0008270,zinc ion binding|GO:0005515,protein binding|GO:0046872,metal ion binding|GO:0005488,binding	hsa04141,Protein processing in endoplasmic reticulum	http://www.uniprot.org/uniprot/Q8TAT6
P02765	0.58775	-0.766725	P02765	AHSG	GO:0019220,regulation of phosphate metabolic process|GO:0080090,regulation of primary metabolic process|GO:0019222,regulation of metabolic process|GO:0051049,regulation of transport|GO:0048585,negative regulation of response to stimulus|GO:0048583,regulation of response to stimulus|GO:0001501,skeletal system development|GO:0001503,ossification|GO:0007165,signal transduction|GO:0007166,cell surfac…	GO:0043230,extracellular organelle|GO:0031982,vesicle|GO:0044421,extracellular region part|GO:0043227,membrane-bounded organelle|GO:0072562,blood microparticle|GO:0031988,membrane-bounded vesicle|GO:0005576,extracellular region|GO:0005615,extracellular space|GO:1903561,extracellular vesicle|GO:0065010,extracellular membrane-bounded organelle|GO:0043226,organelle|GO:0070062,extracellular exosome	GO:0019210,kinase inhibitor activity|GO:0004866,endopeptidase inhibitor activity|GO:0019207,kinase regulator activity|GO:0061135,endopeptidase regulator activity|GO:0061134,peptidase regulator activity|GO:0030414,peptidase inhibitor activity|GO:0004869,cysteine-type endopeptidase inhibitor activity|GO:0004857,enzyme inhibitor activity|GO:0098772,molecular function regulator|GO:0030234,enzyme regu…		http://www.uniprot.org/uniprot/P02765
P53801	0.591	-0.75877	P53801	PTTG1IP	GO:2001234,negative regulation of apoptotic signaling pathway|GO:0051169,nuclear transport|GO:0008104,protein localization|GO:0080090,regulation of primary metabolic process|GO:0019222,regulation of metabolic process|GO:2001233,regulation of apoptotic signaling pathway|GO:0048585,negative regulation of response to stimulus|GO:0048583,regulation of response to stimulus|GO:0007165,signal transducti…	GO:0044421,extracellular region part|GO:0043229,intracellular organelle|GO:0043227,membrane-bounded organelle|GO:0043226,organelle|GO:0031224,intrinsic component of membrane|GO:0005737,cytoplasm|GO:0031982,vesicle|GO:0016021,integral component of membrane|GO:0016020,membrane|GO:0031988,membrane-bounded vesicle|GO:1903561,extracellular vesicle|GO:0070062,extracellular exosome|GO:0043230,extracellu…	GO:0002039,p53 binding|GO:0005488,binding|GO:0005515,protein binding		http://www.uniprot.org/uniprot/P53801
P07951	0.59575	-0.747221	P07951	TPM2	GO:0019222,regulation of metabolic process|GO:0006928,movement of cell or subcellular component|GO:0003012,muscle system process|GO:0032501,multicellular organismal process|GO:0050789,regulation of biological process|GO:0044699,single-organism process|GO:0043462,regulation of ATPase activity|GO:0006936,muscle contraction|GO:0033275,actin-myosin filament sliding|GO:0065007,biological regulation|GO…	GO:0015629,actin cytoskeleton|GO:0030016,myofibril|GO:0030017,sarcomere|GO:0043229,intracellular organelle|GO:0043228,non-membrane-bounded organelle|GO:0043226,organelle|GO:0005856,cytoskeleton|GO:0044430,cytoskeletal part|GO:0005737,cytoplasm|GO:0044424,intracellular part|GO:0005865,striated muscle thin filament|GO:0005862,muscle thin filament tropomyosin|GO:0036379,myofilament|GO:0043232,intrac…	GO:0008092,cytoskeletal protein binding|GO:0005198,structural molecule activity|GO:0003779,actin binding|GO:0008307,structural constituent of muscle|GO:0005488,binding|GO:0005515,protein binding	hsa05410,Hypertrophic cardiomyopathy (HCM)|hsa05414,Dilated cardiomyopathy|hsa04260,Cardiac muscle contraction|hsa04261,Adrenergic signaling in cardiomyocytes	http://www.uniprot.org/uniprot/P07951
Q8N699	0.5996	-0.737928	Q8N699	MYCT1		GO:0043231,intracellular membrane-bounded organelle|GO:0005634,nucleus|GO:0044464,cell part|GO:0005623,cell|GO:0005622,intracellular|GO:0043229,intracellular organelle|GO:0044424,intracellular part|GO:0043227,membrane-bounded organelle|GO:0043226,organelle			http://www.uniprot.org/uniprot/Q8N699
O75947	0.60085	-0.734923	O75947	ATP5H	GO:0009167,purine ribonucleoside monophosphate metabolic process|GO:0009165,nucleotide biosynthetic process|GO:0009163,nucleoside biosynthetic process|GO:0009161,ribonucleoside monophosphate metabolic process|GO:1901362,organic cyclic compound biosynthetic process|GO:0042451,purine nucleoside biosynthetic process|GO:0009168,purine ribonucleoside monophosphate biosynthetic process|GO:0044710,singl…	GO:0098796,membrane protein complex|GO:0044464,cell part|GO:0031974,membrane-enclosed lumen|GO:0031975,envelope|GO:0043229,intracellular organelle|GO:0031988,membrane-bounded vesicle|GO:0043227,membrane-bounded organelle|GO:0043226,organelle|GO:0005737,cytoplasm|GO:0005654,nucleoplasm|GO:0045263,proton-transporting ATP synthase complex, coupling factor F(o)|GO:0070062,extracellular exosome|GO:003…	GO:0022891,substrate-specific transmembrane transporter activity|GO:0022890,inorganic cation transmembrane transporter activity|GO:0016818,hydrolase activity, acting on acid anhydrides, in phosphorus-containing anhydrides|GO:0022892,substrate-specific transporter activity|GO:0016787,hydrolase activity|GO:0005215,transporter activity|GO:0003824,catalytic activity|GO:0008324,cation transmembrane tr…	hsa05016,Huntington's disease|hsa01100,Metabolic pathways|hsa05010,Alzheimer's disease|hsa05012,Parkinson's disease|hsa00190,Oxidative phosphorylation	http://www.uniprot.org/uniprot/O75947
P20338	0.60255	-0.730847	P20338	RAB4A	GO:0008104,protein localization|GO:0051234,establishment of localization|GO:0009893,positive regulation of metabolic process|GO:0019222,regulation of metabolic process|GO:0051049,regulation of transport|GO:0006810,transport|GO:0051128,regulation of cellular component organization|GO:0061024,membrane organization|GO:0023052,signaling|GO:0007165,signal transduction|GO:0032879,regulation of localiza…	GO:0055037,recycling endosome|GO:0043229,intracellular organelle|GO:0071944,cell periphery|GO:0032593,insulin-responsive compartment|GO:0043227,membrane-bounded organelle|GO:0043226,organelle|GO:0005737,cytoplasm|GO:0070062,extracellular exosome|GO:0016023,cytoplasmic membrane-bounded vesicle|GO:0031410,cytoplasmic vesicle|GO:0016020,membrane|GO:0031988,membrane-bounded vesicle|GO:0048471,perinuc…	GO:0035639,purine ribonucleoside triphosphate binding|GO:0019899,enzyme binding|GO:0008047,enzyme activator activity|GO:0060590,ATPase regulator activity|GO:0098772,molecular function regulator|GO:1901363,heterocyclic compound binding|GO:0001883,purine nucleoside binding|GO:0001882,nucleoside binding|GO:0008565,protein transporter activity|GO:0019001,guanyl nucleotide binding|GO:0000149,SNARE bin…	hsa04144,Endocytosis	http://www.uniprot.org/uniprot/P20338
P12814	0.60485	-0.725351	P12814	ACTN1	GO:0007599,hemostasis|GO:0080090,regulation of primary metabolic process|GO:0019222,regulation of metabolic process|GO:0007596,blood coagulation|GO:0048468,cell development|GO:0030220,platelet formation|GO:0007160,cell-matrix adhesion|GO:1901362,organic cyclic compound biosynthetic process|GO:0071840,cellular component organization or biogenesis|GO:0032774,RNA biosynthetic process|GO:0048869,cell…	GO:0032432,actin filament bundle|GO:0015629,actin cytoskeleton|GO:0005886,plasma membrane|GO:0031974,membrane-enclosed lumen|GO:0030016,myofibril|GO:0030017,sarcomere|GO:0043229,intracellular organelle|GO:0043228,non-membrane-bounded organelle|GO:0060205,cytoplasmic membrane-bounded vesicle lumen|GO:0044424,intracellular part|GO:0005924,cell-substrate adherens junction|GO:0005925,focal adhesion|G…	GO:0017166,vinculin binding|GO:0044877,macromolecular complex binding|GO:0005488,binding|GO:0003676,nucleic acid binding|GO:0044325,ion channel binding|GO:1901363,heterocyclic compound binding|GO:0043169,cation binding|GO:0003713,transcription coactivator activity|GO:0003712,transcription cofactor activity|GO:0043167,ion binding|GO:0003779,actin binding|GO:0005509,calcium ion binding|GO:0000989,t…	hsa05322,Systemic lupus erythematosus|hsa05203,Viral carcinogenesis|hsa04530,Tight junction|hsa04670,Leukocyte transendothelial migration|hsa05146,Amoebiasis|hsa04510,Focal adhesion|hsa04520,Adherens junction|hsa05412,Arrhythmogenic right ventricular cardiomyopathy (ARVC)|hsa04810,Regulation of actin cytoskeleton	http://www.uniprot.org/uniprot/P12814
P19105	0.6061	-0.722372	P19105	MYL12A	GO:0008104,protein localization|GO:0007599,hemostasis|GO:0007596,blood coagulation|GO:0048468,cell development|GO:0061024,membrane organization|GO:0007009,plasma membrane organization|GO:0007165,signal transduction|GO:0007166,cell surface receptor signaling pathway|GO:0007167,enzyme linked receptor protein signaling pathway|GO:0007169,transmembrane receptor protein tyrosine kinase signaling pathw…	GO:0032432,actin filament bundle|GO:0015629,actin cytoskeleton|GO:0030016,myofibril|GO:0030017,sarcomere|GO:0043229,intracellular organelle|GO:0043228,non-membrane-bounded organelle|GO:0044430,cytoskeletal part|GO:0043227,membrane-bounded organelle|GO:0043226,organelle|GO:0030018,Z disc|GO:0042641,actomyosin|GO:0005856,cytoskeleton|GO:0001725,stress fiber|GO:0031982,vesicle|GO:0031674,I band|GO:0…	GO:0043169,cation binding|GO:0035254,glutamate receptor binding|GO:0043167,ion binding|GO:0005509,calcium ion binding|GO:0005515,protein binding|GO:0005102,receptor binding|GO:0046872,metal ion binding|GO:0005488,binding	hsa04530,Tight junction|hsa04670,Leukocyte transendothelial migration|hsa04611,Platelet activation|hsa04510,Focal adhesion|hsa04810,Regulation of actin cytoskeleton	http://www.uniprot.org/uniprot/P19105
Q9NX76	0.6082	-0.717382	Q9NX76	CMTM6	GO:0040011,locomotion|GO:0006935,chemotaxis|GO:0042330,taxis|GO:0050896,response to stimulus|GO:0042221,response to chemical|GO:0009605,response to external stimulus	GO:0043230,extracellular organelle|GO:0031982,vesicle|GO:0044421,extracellular region part|GO:0043227,membrane-bounded organelle|GO:0016021,integral component of membrane|GO:0016020,membrane|GO:0031988,membrane-bounded vesicle|GO:0005576,extracellular region|GO:0005615,extracellular space|GO:0044425,membrane part|GO:1903561,extracellular vesicle|GO:0065010,extracellular membrane-bounded organelle…	GO:0005102,receptor binding|GO:0005125,cytokine activity|GO:0005488,binding|GO:0005515,protein binding		http://www.uniprot.org/uniprot/Q9NX76
Q9H2K8	0.61075	-0.711346	Q9H2K8	TAOK3	GO:0043549,regulation of kinase activity|GO:0019220,regulation of phosphate metabolic process|GO:0080090,regulation of primary metabolic process|GO:0019222,regulation of metabolic process|GO:0000086,G2/M transition of mitotic cell cycle|GO:0048585,negative regulation of response to stimulus|GO:0048584,positive regulation of response to stimulus|GO:0048583,regulation of response to stimulus|GO:003…	GO:0005737,cytoplasm|GO:0043231,intracellular membrane-bounded organelle|GO:0005634,nucleus|GO:0016020,membrane|GO:0044464,cell part|GO:0005623,cell|GO:0005622,intracellular|GO:0043229,intracellular organelle|GO:0071944,cell periphery|GO:0005886,plasma membrane|GO:0044424,intracellular part|GO:0043227,membrane-bounded organelle|GO:0043226,organelle	GO:0019207,kinase regulator activity|GO:0035639,purine ribonucleoside triphosphate binding|GO:0060089,molecular transducer activity|GO:0005488,binding|GO:0004871,signal transducer activity|GO:0004857,enzyme inhibitor activity|GO:0098772,molecular function regulator|GO:1901363,heterocyclic compound binding|GO:0001883,purine nucleoside binding|GO:0001882,nucleoside binding|GO:0043168,anion binding|…	hsa04010,MAPK signaling pathway	http://www.uniprot.org/uniprot/Q9H2K8
Q9UNH7	0.62845	-0.67013	Q9UNH7	SNX6	GO:0043549,regulation of kinase activity|GO:0019220,regulation of phosphate metabolic process|GO:0080090,regulation of primary metabolic process|GO:0019222,regulation of metabolic process|GO:0051049,regulation of transport|GO:0048585,negative regulation of response to stimulus|GO:0048583,regulation of response to stimulus|GO:0006820,anion transport|GO:0008104,protein localization|GO:0002703,regul…	GO:0019898,extrinsic component of membrane|GO:0043229,intracellular organelle|GO:0043227,membrane-bounded organelle|GO:0043226,organelle|GO:0010008,endosome membrane|GO:0005737,cytoplasm|GO:0044446,intracellular organelle part|GO:0031982,vesicle|GO:0016023,cytoplasmic membrane-bounded vesicle|GO:0031410,cytoplasmic vesicle|GO:0005634,nucleus|GO:0016020,membrane|GO:0031988,membrane-bounded vesicle…	GO:0043168,anion binding|GO:0034452,dynactin binding|GO:0008092,cytoskeletal protein binding|GO:0035091,phosphatidylinositol binding|GO:0005543,phospholipid binding|GO:0008289,lipid binding|GO:0043167,ion binding|GO:0005488,binding|GO:0005515,protein binding|GO:0046983,protein dimerization activity|GO:0042802,identical protein binding|GO:0042803,protein homodimerization activity	hsa04144,Endocytosis	http://www.uniprot.org/uniprot/Q9UNH7
Q8NEU8	0.6316	-0.662917	Q8NEU8	APPL2	GO:0044700,single organism signaling|GO:0044699,single-organism process|GO:0008283,cell proliferation|GO:0050896,response to stimulus|GO:0009987,cellular process|GO:0044763,single-organism cellular process|GO:0051716,cellular response to stimulus|GO:0050794,regulation of cellular process|GO:0065007,biological regulation|GO:0023052,signaling|GO:0007165,signal transduction|GO:0007154,cell communica…	GO:0044421,extracellular region part|GO:0031974,membrane-enclosed lumen|GO:0043229,intracellular organelle|GO:0005622,intracellular|GO:0043227,membrane-bounded organelle|GO:0043226,organelle|GO:0010008,endosome membrane|GO:0005737,cytoplasm|GO:1903561,extracellular vesicle|GO:0070603,SWI/SNF superfamily-type complex|GO:0031982,vesicle|GO:0031981,nuclear lumen|GO:0005634,nucleus|GO:0016020,membran…	GO:0005488,binding|GO:0005515,protein binding		http://www.uniprot.org/uniprot/Q8NEU8
Q14254	0.63695	-0.650748	Q14254	FLOT2	GO:0034114,regulation of heterotypic cell-cell adhesion|GO:0034113,heterotypic cell-cell adhesion|GO:0080090,regulation of primary metabolic process|GO:0019222,regulation of metabolic process|GO:0034110,regulation of homotypic cell-cell adhesion|GO:0048584,positive regulation of response to stimulus|GO:0048583,regulation of response to stimulus|GO:0031349,positive regulation of defense response|G…	GO:0005911,cell-cell junction|GO:0015629,actin cytoskeleton|GO:0098590,plasma membrane region|GO:0045177,apical part of cell|GO:0002080,acrosomal membrane|GO:0005901,caveola|GO:0043229,intracellular organelle|GO:0043228,non-membrane-bounded organelle|GO:0001669,acrosomal vesicle|GO:0044424,intracellular part|GO:0005924,cell-substrate adherens junction|GO:0005925,focal adhesion|GO:0043227,membrane…	GO:0005515,protein binding|GO:0035255,ionotropic glutamate receptor binding|GO:0035254,glutamate receptor binding|GO:0019899,enzyme binding|GO:0002020,protease binding|GO:0046983,protein dimerization activity|GO:0046982,protein heterodimerization activity|GO:0005102,receptor binding|GO:0005488,binding	hsa04910,Insulin signaling pathway	http://www.uniprot.org/uniprot/Q14254
Q9UL15	0.6396	-0.644758	Q9UL15	BAG5	GO:2001234,negative regulation of apoptotic signaling pathway|GO:0051348,negative regulation of transferase activity|GO:0090083,regulation of inclusion body assembly|GO:0080090,regulation of primary metabolic process|GO:0032434,regulation of proteasomal ubiquitin-dependent protein catabolic process|GO:2001233,regulation of apoptotic signaling pathway|GO:0048585,negative regulation of response to …	GO:0005737,cytoplasm|GO:0005829,cytosol|GO:0043231,intracellular membrane-bounded organelle|GO:0005634,nucleus|GO:0016020,membrane|GO:0044464,cell part|GO:0044444,cytoplasmic part|GO:0005739,mitochondrion|GO:0005622,intracellular|GO:0005623,cell|GO:0043229,intracellular organelle|GO:0016234,inclusion body|GO:0044424,intracellular part|GO:0048471,perinuclear region of cytoplasm|GO:0043227,membrane…	GO:0031625,ubiquitin protein ligase binding|GO:0044389,ubiquitin-like protein ligase binding|GO:0051087,chaperone binding|GO:0019899,enzyme binding|GO:0019901,protein kinase binding|GO:0019900,kinase binding|GO:0005488,binding|GO:0005515,protein binding		http://www.uniprot.org/uniprot/Q9UL15
P78344	0.646	-0.630394	P78344	EIF4G2	GO:0044238,primary metabolic process|GO:0019221,cytokine-mediated signaling pathway|GO:0019222,regulation of metabolic process|GO:0051246,regulation of protein metabolic process|GO:0031323,regulation of cellular metabolic process|GO:1901564,organonitrogen compound metabolic process|GO:0044249,cellular biosynthetic process|GO:0034641,cellular nitrogen compound metabolic process|GO:0043043,peptide …	GO:0043234,protein complex|GO:0005737,cytoplasm|GO:0032991,macromolecular complex|GO:0016281,eukaryotic translation initiation factor 4F complex|GO:0016020,membrane|GO:0044464,cell part|GO:0005623,cell|GO:0005622,intracellular|GO:0044444,cytoplasmic part|GO:0044424,intracellular part|GO:0005829,cytosol	GO:0005488,binding|GO:0005515,protein binding|GO:0097159,organic cyclic compound binding|GO:0044822,poly(A) RNA binding|GO:0008135,translation factor activity, RNA binding|GO:0003723,RNA binding|GO:0003676,nucleic acid binding|GO:1901363,heterocyclic compound binding|GO:0003743,translation initiation factor activity	hsa03013,RNA transport|hsa05416,Viral myocarditis	http://www.uniprot.org/uniprot/P78344
Q99418	0.6526	-0.615729	Q99418	CYTH2	GO:0006810,transport|GO:0009893,positive regulation of metabolic process|GO:0019222,regulation of metabolic process|GO:0030155,regulation of cell adhesion|GO:0048583,regulation of response to stimulus|GO:0030036,actin cytoskeleton organization|GO:0006897,endocytosis|GO:0023052,signaling|GO:0007165,signal transduction|GO:0023051,regulation of signaling|GO:0051234,establishment of localization|GO:0…	GO:0044463,cell projection part|GO:0030427,site of polarized growth|GO:0030426,growth cone|GO:0043229,intracellular organelle|GO:0071944,cell periphery|GO:0043227,membrane-bounded organelle|GO:0043226,organelle|GO:0005737,cytoplasm|GO:0031984,organelle subcompartment|GO:0016020,membrane|GO:0097458,neuron part|GO:0044431,Golgi apparatus part|GO:0043005,neuron projection|GO:0005794,Golgi apparatus|…	GO:0043168,anion binding|GO:0070679,inositol 1,4,5 trisphosphate binding|GO:0043178,alcohol binding|GO:0005085,guanyl-nucleotide exchange factor activity|GO:0008289,lipid binding|GO:0043167,ion binding|GO:0036094,small molecule binding|GO:0005488,binding|GO:0005515,protein binding|GO:0098772,molecular function regulator|GO:0005086,ARF guanyl-nucleotide exchange factor activity	hsa04144,Endocytosis	http://www.uniprot.org/uniprot/Q99418
O14618	0.6547	-0.611094	O14618	CCS	GO:0051716,cellular response to stimulus|GO:0009893,positive regulation of metabolic process|GO:0019222,regulation of metabolic process|GO:0000305,response to oxygen radical|GO:0006810,transport|GO:0035434,copper ion transmembrane transport|GO:0000303,response to superoxide|GO:0000302,response to reactive oxygen species|GO:0006801,superoxide metabolic process|GO:0070887,cellular response to chemi…	GO:0005737,cytoplasm|GO:0043231,intracellular membrane-bounded organelle|GO:0005829,cytosol|GO:0044464,cell part|GO:0044444,cytoplasmic part|GO:0005623,cell|GO:0043226,organelle|GO:0043229,intracellular organelle|GO:0044424,intracellular part|GO:0005622,intracellular|GO:0043227,membrane-bounded organelle|GO:0005634,nucleus	GO:0005488,binding|GO:0046872,metal ion binding|GO:0008270,zinc ion binding|GO:0016491,oxidoreductase activity|GO:0016721,oxidoreductase activity, acting on superoxide radicals as acceptor|GO:0046914,transition metal ion binding|GO:0046915,transition metal ion transmembrane transporter activity|GO:0043167,ion binding|GO:0016667,oxidoreductase activity, acting on a sulfur group of donors|GO:000537…	hsa05014,Amyotrophic lateral sclerosis (ALS)	http://www.uniprot.org/uniprot/O14618
P04004	0.6559	-0.608452	P04004	VTN	GO:0019220,regulation of phosphate metabolic process|GO:0080090,regulation of primary metabolic process|GO:0019222,regulation of metabolic process|GO:0051049,regulation of transport|GO:0048585,negative regulation of response to stimulus|GO:0048584,positive regulation of response to stimulus|GO:0048583,regulation of response to stimulus|GO:0007160,cell-matrix adhesion|GO:0007165,signal transductio…	GO:0031012,extracellular matrix|GO:0071944,cell periphery|GO:0043227,membrane-bounded organelle|GO:0043226,organelle|GO:0070062,extracellular exosome|GO:0005615,extracellular space|GO:0016020,membrane|GO:0072562,blood microparticle|GO:0031988,membrane-bounded vesicle|GO:0044459,plasma membrane part|GO:0005886,plasma membrane|GO:0032991,macromolecular complex|GO:1903561,extracellular vesicle|GO:00…	GO:0038024,cargo receptor activity|GO:0050840,extracellular matrix binding|GO:0030247,polysaccharide binding|GO:0030246,carbohydrate binding|GO:0060089,molecular transducer activity|GO:0044877,macromolecular complex binding|GO:0004872,receptor activity|GO:1901681,sulfur compound binding|GO:0043167,ion binding|GO:0032403,protein complex binding|GO:0005178,integrin binding|GO:0050839,cell adhesion …	hsa05205,Proteoglycans in cancer|hsa04512,ECM-receptor interaction|hsa04510,Focal adhesion|hsa04151,PI3K-Akt signaling pathway	http://www.uniprot.org/uniprot/P04004
Q96T51	0.6566	-0.606913	Q96T51	RUFY1	GO:0008104,protein localization|GO:0051049,regulation of transport|GO:0051128,regulation of cellular component organization|GO:0050789,regulation of biological process|GO:0071840,cellular component organization or biogenesis|GO:0032879,regulation of localization|GO:0016043,cellular component organization|GO:0065007,biological regulation|GO:0071702,organic substance transport|GO:0033036,macromolec…	GO:0043229,intracellular organelle|GO:0043227,membrane-bounded organelle|GO:0043226,organelle|GO:0010008,endosome membrane|GO:0005737,cytoplasm|GO:0031090,organelle membrane|GO:0005634,nucleus|GO:0016020,membrane|GO:0031901,early endosome membrane|GO:0098588,bounding membrane of organelle|GO:0012505,endomembrane system|GO:0043231,intracellular membrane-bounded organelle|GO:0044464,cell part|GO:00…	GO:0008565,protein transporter activity|GO:0043169,cation binding|GO:0022892,substrate-specific transporter activity|GO:0046914,transition metal ion binding|GO:0005215,transporter activity|GO:0008289,lipid binding|GO:0043167,ion binding|GO:0008270,zinc ion binding|GO:0005515,protein binding|GO:0046872,metal ion binding|GO:0005488,binding	hsa04144,Endocytosis	http://www.uniprot.org/uniprot/Q96T51
P00734	0.6583	-0.603183	P00734	F2	GO:0009628,response to abiotic stimulus|GO:0019220,regulation of phosphate metabolic process|GO:0080090,regulation of primary metabolic process|GO:0019222,regulation of metabolic process|GO:0051049,regulation of transport|GO:0048585,negative regulation of response to stimulus|GO:0048584,positive regulation of response to stimulus|GO:0048583,regulation of response to stimulus|GO:0032846,positive r…	GO:0005783,endoplasmic reticulum|GO:0031974,membrane-enclosed lumen|GO:0031012,extracellular matrix|GO:0043229,intracellular organelle|GO:0071944,cell periphery|GO:0043227,membrane-bounded organelle|GO:0043226,organelle|GO:0005737,cytoplasm|GO:0070062,extracellular exosome|GO:0005615,extracellular space|GO:0016020,membrane|GO:0072562,blood microparticle|GO:0031988,membrane-bounded vesicle|GO:0044…	GO:0004252,serine-type endopeptidase activity|GO:0004175,endopeptidase activity|GO:0038023,signaling receptor activity|GO:0060089,molecular transducer activity|GO:0005488,binding|GO:0004871,signal transducer activity|GO:0008233,peptidase activity|GO:0008236,serine-type peptidase activity|GO:0043169,cation binding|GO:0008083,growth factor activity|GO:0043167,ion binding|GO:0005509,calcium ion bind…	hsa04080,Neuroactive ligand-receptor interaction|hsa04610,Complement and coagulation cascades|hsa04810,Regulation of actin cytoskeleton	http://www.uniprot.org/uniprot/P00734
P01137	0.6617	-0.595751	P01137	TGFB1	GO:0033157,regulation of intracellular protein transport|GO:0051169,nuclear transport|GO:0051168,nuclear export|GO:0006909,phagocytosis|GO:0045216,cell-cell junction organization|GO:0051046,regulation of secretion|GO:0051047,positive regulation of secretion|GO:0051049,regulation of transport|GO:0001667,ameboidal-type cell migration|GO:0007596,blood coagulation|GO:0032355,response to estradiol|GO:…
O43399	0.66375	-0.591288	O43399	TPD52L2	GO:0042127,regulation of cell proliferation|GO:0008283,cell proliferation|GO:0009987,cellular process|GO:0050794,regulation of cellular process|GO:0065007,biological regulation|GO:0050789,regulation of biological process|GO:0044699,single-organism process	GO:0005737,cytoplasm|GO:0044464,cell part|GO:0005623,cell|GO:0005622,intracellular|GO:0044444,cytoplasmic part|GO:0044424,intracellular part|GO:0048471,perinuclear region of cytoplasm	GO:0005488,binding|GO:0005515,protein binding|GO:0097159,organic cyclic compound binding|GO:0044822,poly(A) RNA binding|GO:0003723,RNA binding|GO:0003676,nucleic acid binding|GO:0046983,protein dimerization activity|GO:0046982,protein heterodimerization activity|GO:1901363,heterocyclic compound binding|GO:0042802,identical protein binding|GO:0042803,protein homodimerization activity		http://www.uniprot.org/uniprot/O43399
Q5JSH3	0.6654	-0.587706	Q5JSH3	WDR44		GO:0043229,intracellular organelle|GO:0043227,membrane-bounded organelle|GO:0043226,organelle|GO:0010008,endosome membrane|GO:0005737,cytoplasm|GO:0031090,organelle membrane|GO:0098805,whole membrane|GO:0016020,membrane|GO:0048471,perinuclear region of cytoplasm|GO:0005794,Golgi apparatus|GO:0098588,bounding membrane of organelle|GO:0012505,endomembrane system|GO:0043231,intracellular membrane-bo…			http://www.uniprot.org/uniprot/Q5JSH3
P17301	1.50555	0.590291	P17301	ITGA2	GO:0007599,hemostasis|GO:0007596,blood coagulation|GO:0048468,cell development|GO:0007160,cell-matrix adhesion|GO:0007165,signal transduction|GO:0007166,cell surface receptor signaling pathway|GO:0071840,cellular component organization or biogenesis|GO:0051716,cellular response to stimulus|GO:0042330,taxis|GO:0048869,cellular developmental process|GO:0007369,gastrulation|GO:0009611,response to wo…	GO:0009897,external side of plasma membrane|GO:0098636,protein complex involved in cell adhesion|GO:0045178,basal part of cell|GO:0071944,cell periphery|GO:0098552,side of membrane|GO:0005924,cell-substrate adherens junction|GO:0005925,focal adhesion|GO:0031226,intrinsic component of plasma membrane|GO:0031224,intrinsic component of membrane|GO:0034666,integrin alpha2-beta1 complex|GO:0016021,int…	GO:0098634,protein binding involved in cell-matrix adhesion|GO:0043169,cation binding|GO:0046872,metal ion binding|GO:0038023,signaling receptor activity|GO:0098631,protein binding involved in cell adhesion|GO:0005515,protein binding|GO:0043167,ion binding|GO:0001618,virus receptor activity|GO:0098639,collagen binding involved in cell-matrix adhesion|GO:0038064,collagen receptor activity|GO:00600…	hsa04611,Platelet activation|hsa04510,Focal adhesion|hsa05205,Proteoglycans in cancer|hsa05200,Pathways in cancer|hsa04512,ECM-receptor interaction|hsa05222,Small cell lung cancer|hsa04640,Hematopoietic cell lineage|hsa05410,Hypertrophic cardiomyopathy (HCM)|hsa04145,Phagosome|hsa05412,Arrhythmogenic right ventricular cardiomyopathy (ARVC)|hsa04810,Regulation of actin cytoskeleton|hsa05414,Dilate…	http://www.uniprot.org/uniprot/P17301
Q7L576	1.50615	0.590865	Q7L576	CYFIP1	GO:0048675,axon extension|GO:0006909,phagocytosis|GO:0048589,developmental growth|GO:0048588,developmental cell growth|GO:0048584,positive regulation of response to stimulus|GO:0048583,regulation of response to stimulus|GO:0008064,regulation of actin polymerization or depolymerization|GO:0007165,signal transduction|GO:0007166,cell surface receptor signaling pathway|GO:0007167,enzyme linked recept…	GO:0045202,synapse|GO:0005924,cell-substrate adherens junction|GO:0005925,focal adhesion|GO:0043227,membrane-bounded organelle|GO:0043226,organelle|GO:0030054,cell junction|GO:0030055,cell-substrate junction|GO:0005737,cytoplasm|GO:0001726,ruffle|GO:0042995,cell projection|GO:0070062,extracellular exosome|GO:0031988,membrane-bounded vesicle|GO:0097458,neuron part|GO:0034518,RNA cap binding comple…	GO:0019899,enzyme binding|GO:0008092,cytoskeletal protein binding|GO:0051020,GTPase binding|GO:0051015,actin filament binding|GO:0017016,Ras GTPase binding|GO:0003779,actin binding|GO:0031267,small GTPase binding|GO:0048365,Rac GTPase binding|GO:0044877,macromolecular complex binding|GO:0017048,Rho GTPase binding|GO:0005515,protein binding|GO:0032403,protein complex binding|GO:0005488,binding	hsa03013,RNA transport|hsa04810,Regulation of actin cytoskeleton	http://www.uniprot.org/uniprot/Q7L576
P62937	1.50935	0.593927	P62937	PPIA	GO:0008104,protein localization|GO:0007599,hemostasis|GO:0051046,regulation of secretion|GO:0051047,positive regulation of secretion|GO:0051049,regulation of transport|GO:0007596,blood coagulation|GO:0071840,cellular component organization or biogenesis|GO:0009611,response to wounding|GO:0018193,peptidyl-amino acid modification|GO:0044419,interspecies interaction between organisms|GO:0019058,vira…	GO:0043229,intracellular organelle|GO:0005924,cell-substrate adherens junction|GO:0005925,focal adhesion|GO:0043227,membrane-bounded organelle|GO:0043226,organelle|GO:0030054,cell junction|GO:0030055,cell-substrate junction|GO:0005737,cytoplasm|GO:0031982,vesicle|GO:0005615,extracellular space|GO:0005634,nucleus|GO:0016020,membrane|GO:0031988,membrane-bounded vesicle|GO:0070161,anchoring junction…	GO:0042277,peptide binding|GO:0016853,isomerase activity|GO:0005515,protein binding|GO:0033218,amide binding|GO:0044822,poly(A) RNA binding|GO:0051082,unfolded protein binding|GO:0016859,cis-trans isomerase activity|GO:0046790,virion binding|GO:0003824,catalytic activity|GO:0003723,RNA binding|GO:0003755,peptidyl-prolyl cis-trans isomerase activity|GO:0097159,organic cyclic compound binding|GO:19…		http://www.uniprot.org/uniprot/P62937
P06727	1.51045	0.594978	P06727	APOA4	GO:0034441,plasma lipoprotein particle oxidation|GO:0034443,negative regulation of lipoprotein oxidation|GO:0034442,regulation of lipoprotein oxidation|GO:0034445,negative regulation of plasma lipoprotein particle oxidation|GO:0034444,regulation of plasma lipoprotein particle oxidation|GO:0019222,regulation of metabolic process|GO:0060193,positive regulation of lipase activity|GO:0051049,regulati…	GO:0005783,endoplasmic reticulum|GO:0044421,extracellular region part|GO:0031974,membrane-enclosed lumen|GO:0043229,intracellular organelle|GO:1990777,lipoprotein particle|GO:0005622,intracellular|GO:0043227,membrane-bounded organelle|GO:0043226,organelle|GO:0034358,plasma lipoprotein particle|GO:0005737,cytoplasm|GO:0042627,chylomicron|GO:0070062,extracellular exosome|GO:0005615,extracellular sp…	GO:0017127,cholesterol transporter activity|GO:0008047,enzyme activator activity|GO:0098772,molecular function regulator|GO:0060228,phosphatidylcholine-sterol O-acyltransferase activator activity|GO:0043168,anion binding|GO:0043169,cation binding|GO:0046914,transition metal ion binding|GO:0005543,phospholipid binding|GO:0043167,ion binding|GO:0046872,metal ion binding|GO:0030234,enzyme regulator …		http://www.uniprot.org/uniprot/P06727
P21926	1.51165	0.596124	P21926	CD9	GO:0007599,hemostasis|GO:0007596,blood coagulation|GO:0048468,cell development|GO:0061025,membrane fusion|GO:0061024,membrane organization|GO:0060322,head development|GO:0071840,cellular component organization or biogenesis|GO:0000003,reproduction|GO:0030913,paranodal junction assembly|GO:0048869,cellular developmental process|GO:0009611,response to wounding|GO:0048513,organ development|GO:004851…	GO:0098590,plasma membrane region|GO:0005887,integral component of plasma membrane|GO:0009897,external side of plasma membrane|GO:0044421,extracellular region part|GO:0030139,endocytic vesicle|GO:0043229,intracellular organelle|GO:0071944,cell periphery|GO:0098552,side of membrane|GO:0005924,cell-substrate adherens junction|GO:0005925,focal adhesion|GO:0030135,coated vesicle|GO:0043226,organelle|…	GO:0005178,integrin binding|GO:0044877,macromolecular complex binding|GO:0005488,binding|GO:0005515,protein binding|GO:0032403,protein complex binding|GO:0005102,receptor binding|GO:0050839,cell adhesion molecule binding	hsa04640,Hematopoietic cell lineage	http://www.uniprot.org/uniprot/P21926
P04220	1.521	0.60502	P04220	P04220		GO:0043230,extracellular organelle|GO:0031982,vesicle|GO:0044421,extracellular region part|GO:0043227,membrane-bounded organelle|GO:0072562,blood microparticle|GO:0031988,membrane-bounded vesicle|GO:0005576,extracellular region|GO:0005615,extracellular space|GO:1903561,extracellular vesicle|GO:0065010,extracellular membrane-bounded organelle|GO:0043226,organelle|GO:0070062,extracellular exosome	GO:0005488,binding|GO:0003823,antigen binding		http://www.uniprot.org/uniprot/P04220
O15145	1.52135	0.605352	O15145	ARPC3	GO:0006909,phagocytosis|GO:0048584,positive regulation of response to stimulus|GO:0048583,regulation of response to stimulus|GO:0008064,regulation of actin polymerization or depolymerization|GO:0007165,signal transduction|GO:0007166,cell surface receptor signaling pathway|GO:0007167,enzyme linked receptor protein signaling pathway|GO:0030182,neuron differentiation|GO:0007169,transmembrane recepto…	GO:0015629,actin cytoskeleton|GO:0043229,intracellular organelle|GO:0043228,non-membrane-bounded organelle|GO:0005924,cell-substrate adherens junction|GO:0005925,focal adhesion|GO:0043227,membrane-bounded organelle|GO:0043226,organelle|GO:0030054,cell junction|GO:0030055,cell-substrate junction|GO:0005856,cytoskeleton|GO:0042995,cell projection|GO:0031982,vesicle|GO:0016020,membrane|GO:0031988,me…	GO:0005200,structural constituent of cytoskeleton|GO:0008092,cytoskeletal protein binding|GO:0051015,actin filament binding|GO:0005198,structural molecule activity|GO:0003779,actin binding|GO:0044877,macromolecular complex binding|GO:0005488,binding|GO:0005515,protein binding|GO:0032403,protein complex binding	hsa05132,Salmonella infection|hsa05131,Shigellosis|hsa05130,Pathogenic Escherichia coli infection|hsa05100,Bacterial invasion of epithelial cells|hsa04144,Endocytosis|hsa04666,Fc gamma R-mediated phagocytosis|hsa04810,Regulation of actin cytoskeleton	http://www.uniprot.org/uniprot/O15145
P17858	1.5418	0.624616	P17858	PFKL	GO:0090087,regulation of peptide transport|GO:0008104,protein localization|GO:0051046,regulation of secretion|GO:0051289,protein homotetramerization|GO:0051048,negative regulation of secretion|GO:0051049,regulation of transport|GO:0009167,purine ribonucleoside monophosphate metabolic process|GO:0061621,canonical glycolysis|GO:0061620,glycolytic process through glucose-6-phosphate|GO:0044281,small…	GO:0043227,membrane-bounded organelle|GO:0043226,organelle|GO:0005737,cytoplasm|GO:0005945,6-phosphofructokinase complex|GO:0031982,vesicle|GO:0016020,membrane|GO:0031988,membrane-bounded vesicle|GO:0005576,extracellular region|GO:1902494,catalytic complex|GO:0061695,transferase complex, transferring phosphorus-containing groups|GO:1990234,transferase complex|GO:0032991,macromolecular complex|GO:…	GO:0019200,carbohydrate kinase activity|GO:0035639,purine ribonucleoside triphosphate binding|GO:0030246,carbohydrate binding|GO:0019899,enzyme binding|GO:0070095,fructose-6-phosphate binding|GO:0019900,kinase binding|GO:0048029,monosaccharide binding|GO:0003872,6-phosphofructokinase activity|GO:0043167,ion binding|GO:1901363,heterocyclic compound binding|GO:0001883,purine nucleoside binding|GO:0…	hsa01200,Carbon metabolism|hsa01100,Metabolic pathways|hsa00030,Pentose phosphate pathway|hsa04066,HIF-1 signaling pathway|hsa05230,Central carbon metabolism in cancer|hsa00052,Galactose metabolism|hsa00051,Fructose and mannose metabolism|hsa01130,Biosynthesis of antibiotics|hsa01230,Biosynthesis of amino acids|hsa00010,Glycolysis / Gluconeogenesis|hsa04152,AMPK signaling pathway|hsa04922,Glucago…	http://www.uniprot.org/uniprot/P17858
O95433	1.5679	0.648834	O95433	AHSA1	GO:0051336,regulation of hydrolase activity|GO:0043462,regulation of ATPase activity|GO:0009893,positive regulation of metabolic process|GO:0051345,positive regulation of hydrolase activity|GO:0065009,regulation of molecular function|GO:0032781,positive regulation of ATPase activity|GO:0050896,response to stimulus|GO:0050790,regulation of catalytic activity|GO:0008152,metabolic process|GO:0006950…	GO:0005783,endoplasmic reticulum|GO:0043229,intracellular organelle|GO:0043227,membrane-bounded organelle|GO:0043226,organelle|GO:0005737,cytoplasm|GO:0031982,vesicle|GO:0031988,membrane-bounded vesicle|GO:0012505,endomembrane system|GO:1903561,extracellular vesicle|GO:0070062,extracellular exosome|GO:0043230,extracellular organelle|GO:0043231,intracellular membrane-bounded organelle|GO:0005829,c…	GO:0005488,binding|GO:0005515,protein binding|GO:0030234,enzyme regulator activity|GO:0051087,chaperone binding|GO:0008047,enzyme activator activity|GO:0060590,ATPase regulator activity|GO:0098772,molecular function regulator|GO:0060589,nucleoside-triphosphatase regulator activity|GO:0001671,ATPase activator activity		http://www.uniprot.org/uniprot/O95433
P14854	1.5707	0.651408	P14854	COX6B1	GO:0044707,single-multicellular organism process|GO:0032774,RNA biosynthetic process|GO:1902600,hydrogen ion transmembrane transport|GO:0006810,transport|GO:0006366,transcription from RNA polymerase II promoter|GO:0090304,nucleic acid metabolic process|GO:0044249,cellular biosynthetic process|GO:0034641,cellular nitrogen compound metabolic process|GO:0060322,head development|GO:0021762,substantia…	GO:0044464,cell part|GO:0031970,organelle envelope lumen|GO:0031974,membrane-enclosed lumen|GO:0031975,envelope|GO:0043229,intracellular organelle|GO:0043227,membrane-bounded organelle|GO:0043226,organelle|GO:0005737,cytoplasm|GO:0031090,organelle membrane|GO:0016020,membrane|GO:0044444,cytoplasmic part|GO:0005739,mitochondrion|GO:0005758,mitochondrial intermembrane space|GO:0031967,organelle env…	GO:0004129,cytochrome-c oxidase activity|GO:0022890,inorganic cation transmembrane transporter activity|GO:0022891,substrate-specific transmembrane transporter activity|GO:0022892,substrate-specific transporter activity|GO:0005215,transporter activity|GO:0008324,cation transmembrane transporter activity|GO:0022857,transmembrane transporter activity|GO:0015075,ion transmembrane transporter activit…	hsa00190,Oxidative phosphorylation|hsa04260,Cardiac muscle contraction|hsa01100,Metabolic pathways|hsa04932,Non-alcoholic fatty liver disease (NAFLD)|hsa05016,Huntington's disease|hsa05010,Alzheimer's disease|hsa05012,Parkinson's disease	http://www.uniprot.org/uniprot/P14854
P61158	1.5774	0.657549	P61158	ACTR3	GO:0006909,phagocytosis|GO:0048584,positive regulation of response to stimulus|GO:0048583,regulation of response to stimulus|GO:0008064,regulation of actin polymerization or depolymerization|GO:0007163,establishment or maintenance of cell polarity|GO:0007165,signal transduction|GO:0007166,cell surface receptor signaling pathway|GO:0007167,enzyme linked receptor protein signaling pathway|GO:003018…	GO:0015629,actin cytoskeleton|GO:0043229,intracellular organelle|GO:0043228,non-membrane-bounded organelle|GO:0005924,cell-substrate adherens junction|GO:0005925,focal adhesion|GO:0043227,membrane-bounded organelle|GO:0043226,organelle|GO:0030054,cell junction|GO:0030055,cell-substrate junction|GO:0005856,cytoskeleton|GO:0042995,cell projection|GO:0031982,vesicle|GO:0016020,membrane|GO:0031988,me…	GO:0005200,structural constituent of cytoskeleton|GO:0035639,purine ribonucleoside triphosphate binding|GO:0044877,macromolecular complex binding|GO:0005488,binding|GO:0005198,structural molecule activity|GO:1901363,heterocyclic compound binding|GO:1901265,nucleoside phosphate binding|GO:0001882,nucleoside binding|GO:0043168,anion binding|GO:0043167,ion binding|GO:0003779,actin binding|GO:0001883…		http://www.uniprot.org/uniprot/P61158
P13716	1.57765	0.657777	P13716	ALAD	GO:0032025,response to cobalt ion|GO:0009636,response to toxic substance|GO:0006778,porphyrin-containing compound metabolic process|GO:0006779,porphyrin-containing compound biosynthetic process|GO:0044281,small molecule metabolic process|GO:0010043,response to zinc ion|GO:1901362,organic cyclic compound biosynthetic process|GO:0071840,cellular component organization or biogenesis|GO:0010044,respo…	GO:0043229,intracellular organelle|GO:0043227,membrane-bounded organelle|GO:0043226,organelle|GO:0005737,cytoplasm|GO:0031982,vesicle|GO:0005634,nucleus|GO:0031988,membrane-bounded vesicle|GO:1903561,extracellular vesicle|GO:0005615,extracellular space|GO:0043230,extracellular organelle|GO:0043231,intracellular membrane-bounded organelle|GO:0070062,extracellular exosome|GO:0005829,cytosol|GO:0044…	GO:0043169,cation binding|GO:0046914,transition metal ion binding|GO:0016835,carbon-oxygen lyase activity|GO:0004655,porphobilinogen synthase activity|GO:0032791,lead ion binding|GO:0043167,ion binding|GO:0003824,catalytic activity|GO:0008270,zinc ion binding|GO:0005515,protein binding|GO:0016836,hydro-lyase activity|GO:0046872,metal ion binding|GO:0016829,lyase activity|GO:0042802,identical prot…	hsa00860,Porphyrin and chlorophyll metabolism|hsa01100,Metabolic pathways	http://www.uniprot.org/uniprot/P13716
P45880	1.58805	0.667256	P45880	VDAC2	GO:2001234,negative regulation of apoptotic signaling pathway|GO:0022607,cellular component assembly|GO:0006461,protein complex assembly|GO:0051234,establishment of localization|GO:2001233,regulation of apoptotic signaling pathway|GO:0043933,macromolecular complex subunit organization|GO:0051049,regulation of transport|GO:0048585,negative regulation of response to stimulus|GO:0034622,cellular mac…	GO:0098796,membrane protein complex|GO:0044421,extracellular region part|GO:0044464,cell part|GO:0031974,membrane-enclosed lumen|GO:0031975,envelope|GO:0043229,intracellular organelle|GO:0043228,non-membrane-bounded organelle|GO:0042645,mitochondrial nucleoid|GO:0043227,membrane-bounded organelle|GO:0043226,organelle|GO:0031224,intrinsic component of membrane|GO:0005737,cytoplasm|GO:0046930,pore …	GO:0015288,porin activity|GO:0005488,binding|GO:0022838,substrate-specific channel activity|GO:1901363,heterocyclic compound binding|GO:1901265,nucleoside phosphate binding|GO:0008509,anion transmembrane transporter activity|GO:0000166,nucleotide binding|GO:0022829,wide pore channel activity|GO:0022803,passive transmembrane transporter activity|GO:0005253,anion channel activity|GO:0005215,transpo…	hsa04022,cGMP-PKG signaling pathway|hsa04020,Calcium signaling pathway|hsa05166,HTLV-I infection|hsa05016,Huntington's disease|hsa05012,Parkinson's disease	http://www.uniprot.org/uniprot/P45880
P48047	1.61875	0.69488	P48047	ATP5O	GO:0009167,purine ribonucleoside monophosphate metabolic process|GO:0009165,nucleotide biosynthetic process|GO:0009163,nucleoside biosynthetic process|GO:0009161,ribonucleoside monophosphate metabolic process|GO:1901362,organic cyclic compound biosynthetic process|GO:0042451,purine nucleoside biosynthetic process|GO:0009168,purine ribonucleoside monophosphate biosynthetic process|GO:0044710,singl…	GO:0044464,cell part|GO:0031975,envelope|GO:0043229,intracellular organelle|GO:0071944,cell periphery|GO:0031988,membrane-bounded vesicle|GO:0043227,membrane-bounded organelle|GO:0043226,organelle|GO:0005737,cytoplasm|GO:0031090,organelle membrane|GO:0098796,membrane protein complex|GO:0005634,nucleus|GO:0016020,membrane|GO:0044444,cytoplasmic part|GO:0005739,mitochondrion|GO:0098800,inner mitoch…	GO:0008144,drug binding|GO:0005488,binding|GO:0016887,ATPase activity|GO:0042625,ATPase activity, coupled to transmembrane movement of ions|GO:0042626,ATPase activity, coupled to transmembrane movement of substances|GO:0016820,hydrolase activity, acting on acid anhydrides, catalyzing transmembrane movement of substances|GO:0046933,proton-transporting ATP synthase activity, rotational mechanism|GO…	hsa05016,Huntington's disease|hsa01100,Metabolic pathways|hsa05010,Alzheimer's disease|hsa05012,Parkinson's disease|hsa00190,Oxidative phosphorylation	http://www.uniprot.org/uniprot/P48047
P24557	1.64215	0.715586	P24557	TBXAS1	GO:0006633,fatty acid biosynthetic process|GO:0006631,fatty acid metabolic process|GO:0006636,unsaturated fatty acid biosynthetic process|GO:0019752,carboxylic acid metabolic process|GO:0043436,oxoacid metabolic process|GO:0009410,response to xenobiotic stimulus|GO:0044281,small molecule metabolic process|GO:0070887,cellular response to chemical stimulus|GO:0044283,small molecule biosynthetic pro…	GO:0005783,endoplasmic reticulum|GO:0005789,endoplasmic reticulum membrane|GO:0042175,nuclear outer membrane-endoplasmic reticulum membrane network|GO:0043229,intracellular organelle|GO:0043227,membrane-bounded organelle|GO:0043226,organelle|GO:0031224,intrinsic component of membrane|GO:0005737,cytoplasm|GO:0031090,organelle membrane|GO:0016021,integral component of membrane|GO:0016020,membrane|G…	GO:0043169,cation binding|GO:0004497,monooxygenase activity|GO:0046872,metal ion binding|GO:0016853,isomerase activity|GO:0020037,heme binding|GO:0046906,tetrapyrrole binding|GO:0097159,organic cyclic compound binding|GO:0016705,oxidoreductase activity, acting on paired donors, with incorporation or reduction of molecular oxygen|GO:0046914,transition metal ion binding|GO:0003824,catalytic activit…	hsa00590,Arachidonic acid metabolism|hsa04611,Platelet activation|hsa01100,Metabolic pathways	http://www.uniprot.org/uniprot/P24557
Q14165	1.6601	0.73127	Q14165	MLEC	GO:0006457,protein folding|GO:0044249,cellular biosynthetic process|GO:0034645,cellular macromolecule biosynthetic process|GO:0009100,glycoprotein metabolic process|GO:0009101,glycoprotein biosynthetic process|GO:0044699,single-organism process|GO:0044267,cellular protein metabolic process|GO:0044710,single-organism metabolic process|GO:0044260,cellular macromolecule metabolic process|GO:0006487,…	GO:0005783,endoplasmic reticulum|GO:0005789,endoplasmic reticulum membrane|GO:0042175,nuclear outer membrane-endoplasmic reticulum membrane network|GO:0043229,intracellular organelle|GO:0043227,membrane-bounded organelle|GO:0043226,organelle|GO:0031224,intrinsic component of membrane|GO:0005737,cytoplasm|GO:0031090,organelle membrane|GO:0016021,integral component of membrane|GO:0016020,membrane|G…	GO:0005488,binding|GO:0030246,carbohydrate binding|GO:0019899,enzyme binding|GO:0005515,protein binding		http://www.uniprot.org/uniprot/Q14165
P30405	1.6641	0.734742	P30405	PPIF	GO:2001234,negative regulation of apoptotic signaling pathway|GO:2001235,positive regulation of apoptotic signaling pathway|GO:0019220,regulation of phosphate metabolic process|GO:0080090,regulation of primary metabolic process|GO:0019222,regulation of metabolic process|GO:2001233,regulation of apoptotic signaling pathway|GO:0051049,regulation of transport|GO:0048585,negative regulation of respon…	GO:0098796,membrane protein complex|GO:0044464,cell part|GO:0031974,membrane-enclosed lumen|GO:0031975,envelope|GO:0043229,intracellular organelle|GO:0043227,membrane-bounded organelle|GO:0043226,organelle|GO:0005737,cytoplasm|GO:0031090,organelle membrane|GO:0005743,mitochondrial inner membrane|GO:0016020,membrane|GO:0044444,cytoplasmic part|GO:0005739,mitochondrion|GO:0098800,inner mitochondria…	GO:0042277,peptide binding|GO:0016853,isomerase activity|GO:0033218,amide binding|GO:0008144,drug binding|GO:0003824,catalytic activity|GO:0005515,protein binding|GO:0003755,peptidyl-prolyl cis-trans isomerase activity|GO:0016018,cyclosporin A binding|GO:0016859,cis-trans isomerase activity|GO:0005488,binding	hsa04022,cGMP-PKG signaling pathway|hsa04020,Calcium signaling pathway|hsa05016,Huntington's disease|hsa05012,Parkinson's disease|hsa05145,Toxoplasmosis	http://www.uniprot.org/uniprot/P30405
P01861	1.67945	0.747989	P01861	IGHG4	GO:0044238,primary metabolic process|GO:0006909,phagocytosis|GO:0006950,response to stress|GO:0048584,positive regulation of response to stimulus|GO:0048583,regulation of response to stimulus|GO:0023052,signaling|GO:0007165,signal transduction|GO:0007166,cell surface receptor signaling pathway|GO:0002455,humoral immune response mediated by circulating immunoglobulin|GO:0050789,regulation of biolo…	GO:0043230,extracellular organelle|GO:0031982,vesicle|GO:0044421,extracellular region part|GO:0043227,membrane-bounded organelle|GO:0072562,blood microparticle|GO:0031988,membrane-bounded vesicle|GO:0005576,extracellular region|GO:0005615,extracellular space|GO:1903561,extracellular vesicle|GO:0065010,extracellular membrane-bounded organelle|GO:0043226,organelle|GO:0070062,extracellular exosome	GO:0005488,binding|GO:0003823,antigen binding		http://www.uniprot.org/uniprot/P01861
P62942	1.70045	0.765917	P62942	FKBP1A	GO:0044238,primary metabolic process|GO:0032924,activin receptor signaling pathway|GO:0032925,regulation of activin receptor signaling pathway|GO:0019222,regulation of metabolic process|GO:0051049,regulation of transport|GO:0032386,regulation of intracellular transport|GO:0048584,positive regulation of response to stimulus|GO:0051282,regulation of sequestering of calcium ion|GO:0051283,negative r…	GO:0005783,endoplasmic reticulum|GO:0005789,endoplasmic reticulum membrane|GO:0030016,myofibril|GO:0030017,sarcomere|GO:0043229,intracellular organelle|GO:0043228,non-membrane-bounded organelle|GO:0005623,cell|GO:0043227,membrane-bounded organelle|GO:0043226,organelle|GO:0030018,Z disc|GO:0005737,cytoplasm|GO:0031984,organelle subcompartment|GO:0070062,extracellular exosome|GO:0016020,membrane|GO…	GO:0005126,cytokine receptor binding|GO:0005160,transforming growth factor beta receptor binding|GO:0008144,drug binding|GO:0060089,molecular transducer activity|GO:0044877,macromolecular complex binding|GO:0005488,binding|GO:0004871,signal transducer activity|GO:0044325,ion channel binding|GO:0098772,molecular function regulator|GO:1901363,heterocyclic compound binding|GO:0019855,calcium channel…		http://www.uniprot.org/uniprot/P62942
Q9Y277	1.7072	0.771632	Q9Y277	VDAC3	GO:0022604,regulation of cell morphogenesis|GO:0022607,cellular component assembly|GO:0015853,adenine transport|GO:0015851,nucleobase transport|GO:0033043,regulation of organelle organization|GO:0030030,cell projection organization|GO:0051049,regulation of transport|GO:0006863,purine nucleobase transport|GO:0051128,regulation of cellular component organization|GO:0060491,regulation of cell projec…	GO:0044421,extracellular region part|GO:0031975,envelope|GO:0043229,intracellular organelle|GO:0043227,membrane-bounded organelle|GO:0043226,organelle|GO:0031224,intrinsic component of membrane|GO:0005737,cytoplasm|GO:0046930,pore complex|GO:0031982,vesicle|GO:0005634,nucleus|GO:0016020,membrane|GO:0044444,cytoplasmic part|GO:0005739,mitochondrion|GO:0031988,membrane-bounded vesicle|GO:0005576,ex…	GO:0015288,porin activity|GO:0005488,binding|GO:0022838,substrate-specific channel activity|GO:1901363,heterocyclic compound binding|GO:1901265,nucleoside phosphate binding|GO:0008509,anion transmembrane transporter activity|GO:0000166,nucleotide binding|GO:0022829,wide pore channel activity|GO:0022803,passive transmembrane transporter activity|GO:0005253,anion channel activity|GO:0005215,transpo…	hsa04022,cGMP-PKG signaling pathway|hsa04020,Calcium signaling pathway|hsa05203,Viral carcinogenesis|hsa05161,Hepatitis B|hsa05166,HTLV-I infection|hsa05016,Huntington's disease|hsa05012,Parkinson's disease	http://www.uniprot.org/uniprot/Q9Y277
P40926	1.79045	0.840322	P40926	MDH2	GO:0044238,primary metabolic process|GO:0019674,NAD metabolic process|GO:0006732,coenzyme metabolic process|GO:0046364,monosaccharide biosynthetic process|GO:0006473,protein acetylation|GO:0006475,internal protein amino acid acetylation|GO:0019752,carboxylic acid metabolic process|GO:0044723,single-organism carbohydrate metabolic process|GO:0006099,tricarboxylic acid cycle|GO:0009060,aerobic resp…	GO:0044464,cell part|GO:0031974,membrane-enclosed lumen|GO:0031975,envelope|GO:0043229,intracellular organelle|GO:0071944,cell periphery|GO:0043227,membrane-bounded organelle|GO:0043226,organelle|GO:0005737,cytoplasm|GO:0070062,extracellular exosome|GO:0031981,nuclear lumen|GO:0005743,mitochondrial inner membrane|GO:0043209,myelin sheath|GO:0005634,nucleus|GO:0016020,membrane|GO:0044444,cytoplasm…	GO:0005488,binding|GO:0016614,oxidoreductase activity, acting on CH-OH group of donors|GO:0016615,malate dehydrogenase activity|GO:0016616,oxidoreductase activity, acting on the CH-OH group of donors, NAD or NADP as acceptor|GO:0043621,protein self-association|GO:0097159,organic cyclic compound binding|GO:0044822,poly(A) RNA binding|GO:0005515,protein binding|GO:0003824,catalytic activity|GO:0030…	hsa00620,Pyruvate metabolism|hsa01100,Metabolic pathways|hsa00630,Glyoxylate and dicarboxylate metabolism|hsa01200,Carbon metabolism|hsa01130,Biosynthesis of antibiotics|hsa00270,Cysteine and methionine metabolism|hsa00020,Citrate cycle (TCA cycle)	http://www.uniprot.org/uniprot/P40926
P52907	1.81405	0.859214	P52907	CAPZA1	GO:0022607,cellular component assembly|GO:0007599,hemostasis|GO:0033043,regulation of organelle organization|GO:0043933,macromolecular complex subunit organization|GO:0050896,response to stimulus|GO:1901879,regulation of protein depolymerization|GO:0051129,negative regulation of cellular component organization|GO:0051128,regulation of cellular component organization|GO:0008064,regulation of actin…	GO:0015629,actin cytoskeleton|GO:0043229,intracellular organelle|GO:0043228,non-membrane-bounded organelle|GO:0043227,membrane-bounded organelle|GO:0043226,organelle|GO:0030054,cell junction|GO:0005856,cytoskeleton|GO:0031982,vesicle|GO:0016020,membrane|GO:0031988,membrane-bounded vesicle|GO:0044430,cytoskeletal part|GO:0005576,extracellular region|GO:0005737,cytoplasm|GO:0005938,cell cortex|GO:0…	GO:0008092,cytoskeletal protein binding|GO:0051015,actin filament binding|GO:0003779,actin binding|GO:0044877,macromolecular complex binding|GO:0005488,binding|GO:0005515,protein binding|GO:0032403,protein complex binding	hsa04144,Endocytosis	http://www.uniprot.org/uniprot/P52907
O15143	1.8591	0.894604	O15143	ARPC1B	GO:0022607,cellular component assembly|GO:0033043,regulation of organelle organization|GO:0043933,macromolecular complex subunit organization|GO:0030036,actin cytoskeleton organization|GO:0051128,regulation of cellular component organization|GO:0008064,regulation of actin polymerization or depolymerization|GO:0034314,Arp2/3 complex-mediated actin nucleation|GO:0034622,cellular macromolecular comp…	GO:0015629,actin cytoskeleton|GO:0043229,intracellular organelle|GO:0043228,non-membrane-bounded organelle|GO:0005924,cell-substrate adherens junction|GO:0005925,focal adhesion|GO:0043227,membrane-bounded organelle|GO:0043226,organelle|GO:0030054,cell junction|GO:0030055,cell-substrate junction|GO:0005856,cytoskeleton|GO:0031982,vesicle|GO:0031988,membrane-bounded vesicle|GO:0044430,cytoskeletal …	GO:0005200,structural constituent of cytoskeleton|GO:0008092,cytoskeletal protein binding|GO:0051015,actin filament binding|GO:0005198,structural molecule activity|GO:0003779,actin binding|GO:0044877,macromolecular complex binding|GO:0005488,binding|GO:0005515,protein binding|GO:0032403,protein complex binding	hsa05132,Salmonella infection|hsa05131,Shigellosis|hsa05130,Pathogenic Escherichia coli infection|hsa05100,Bacterial invasion of epithelial cells|hsa04144,Endocytosis|hsa04666,Fc gamma R-mediated phagocytosis|hsa04810,Regulation of actin cytoskeleton	http://www.uniprot.org/uniprot/O15143
P60709	1.88655	0.91575	P60709	ACTB	GO:0006909,phagocytosis|GO:0007409,axonogenesis|GO:0060249,anatomical structure homeostasis|GO:0048584,positive regulation of response to stimulus|GO:0048583,regulation of response to stimulus|GO:0061024,membrane organization|GO:0060322,head development|GO:0007165,signal transduction|GO:0007166,cell surface receptor signaling pathway|GO:0007167,enzyme linked receptor protein signaling pathway|GO:…	GO:0031248,protein acetyltransferase complex|GO:0016020,membrane|GO:0035770,ribonucleoprotein granule|GO:0005924,cell-substrate adherens junction|GO:0031974,membrane-enclosed lumen|GO:0005623,cell|GO:0043229,intracellular organelle|GO:0043228,non-membrane-bounded organelle|GO:0000785,chromatin|GO:0035267,NuA4 histone acetyltransferase complex|GO:1902562,H4 histone acetyltransferase complex|GO:000…	GO:0019894,kinesin binding|GO:0019899,enzyme binding|GO:0005200,structural constituent of cytoskeleton|GO:0035639,purine ribonucleoside triphosphate binding|GO:0001012,RNA polymerase II regulatory region DNA binding|GO:0001159,core promoter proximal region DNA binding|GO:0001158,enhancer sequence-specific DNA binding|GO:0031491,nucleosome binding|GO:0031490,chromatin DNA binding|GO:0031492,nucleo…	hsa05132,Salmonella infection|hsa05131,Shigellosis|hsa05130,Pathogenic Escherichia coli infection|hsa04611,Platelet activation|hsa04530,Tight junction|hsa04670,Leukocyte transendothelial migration|hsa04145,Phagosome|hsa04510,Focal adhesion|hsa05410,Hypertrophic cardiomyopathy (HCM)|hsa05412,Arrhythmogenic right ventricular cardiomyopathy (ARVC)|hsa05414,Dilated cardiomyopathy|hsa04921,Oxytocin si…	http://www.uniprot.org/uniprot/P60709
O15511	1.88655	0.91575	O15511	ARPC5	GO:0006909,phagocytosis|GO:0048584,positive regulation of response to stimulus|GO:0048583,regulation of response to stimulus|GO:0008064,regulation of actin polymerization or depolymerization|GO:0007165,signal transduction|GO:0007166,cell surface receptor signaling pathway|GO:0007167,enzyme linked receptor protein signaling pathway|GO:0030182,neuron differentiation|GO:0007169,transmembrane recepto…	GO:0015629,actin cytoskeleton|GO:0043229,intracellular organelle|GO:0043228,non-membrane-bounded organelle|GO:0005924,cell-substrate adherens junction|GO:0005925,focal adhesion|GO:0043227,membrane-bounded organelle|GO:0043226,organelle|GO:0030054,cell junction|GO:0030055,cell-substrate junction|GO:0005856,cytoskeleton|GO:0042995,cell projection|GO:0031982,vesicle|GO:0031988,membrane-bounded vesic…	GO:0005200,structural constituent of cytoskeleton|GO:0008092,cytoskeletal protein binding|GO:0051015,actin filament binding|GO:0005198,structural molecule activity|GO:0003779,actin binding|GO:0044877,macromolecular complex binding|GO:0005488,binding|GO:0005515,protein binding|GO:0032403,protein complex binding	hsa05132,Salmonella infection|hsa05131,Shigellosis|hsa05130,Pathogenic Escherichia coli infection|hsa05100,Bacterial invasion of epithelial cells|hsa04144,Endocytosis|hsa04666,Fc gamma R-mediated phagocytosis|hsa04810,Regulation of actin cytoskeleton	http://www.uniprot.org/uniprot/O15511
O15144	1.8972	0.923872	O15144	ARPC2	GO:0006909,phagocytosis|GO:0034446,substrate adhesion-dependent cell spreading|GO:0048584,positive regulation of response to stimulus|GO:0048583,regulation of response to stimulus|GO:0008064,regulation of actin polymerization or depolymerization|GO:0060491,regulation of cell projection assembly|GO:0007165,signal transduction|GO:0007166,cell surface receptor signaling pathway|GO:0007167,enzyme lin…	GO:0015629,actin cytoskeleton|GO:0043229,intracellular organelle|GO:0043228,non-membrane-bounded organelle|GO:0045202,synapse|GO:0005924,cell-substrate adherens junction|GO:0005925,focal adhesion|GO:0043227,membrane-bounded organelle|GO:0043226,organelle|GO:0030054,cell junction|GO:0030055,cell-substrate junction|GO:0005856,cytoskeleton|GO:0042995,cell projection|GO:0070062,extracellular exosome|…	GO:0071933,Arp2/3 complex binding|GO:0005200,structural constituent of cytoskeleton|GO:0008092,cytoskeletal protein binding|GO:0051015,actin filament binding|GO:0005198,structural molecule activity|GO:0003779,actin binding|GO:0019894,kinesin binding|GO:0044877,macromolecular complex binding|GO:0005488,binding|GO:0005515,protein binding|GO:0035650,AP-1 adaptor complex binding|GO:0032403,protein co…	hsa05132,Salmonella infection|hsa05131,Shigellosis|hsa05130,Pathogenic Escherichia coli infection|hsa05100,Bacterial invasion of epithelial cells|hsa04144,Endocytosis|hsa04666,Fc gamma R-mediated phagocytosis|hsa04810,Regulation of actin cytoskeleton	http://www.uniprot.org/uniprot/O15144
P14406	1.9229	0.943284	P14406	COX7A2	GO:0044699,single-organism process|GO:0006818,hydrogen transport|GO:0015992,proton transport|GO:0051234,establishment of localization|GO:1902600,hydrogen ion transmembrane transport|GO:0006812,cation transport|GO:0006811,ion transport|GO:0009987,cellular process|GO:0015672,monovalent inorganic cation transport|GO:0034220,ion transmembrane transport|GO:0044765,single-organism transport|GO:0044763,…	GO:0044464,cell part|GO:0031975,envelope|GO:0043229,intracellular organelle|GO:0043227,membrane-bounded organelle|GO:0043226,organelle|GO:0005737,cytoplasm|GO:0031982,vesicle|GO:0016020,membrane|GO:0044444,cytoplasmic part|GO:0005739,mitochondrion|GO:0031988,membrane-bounded vesicle|GO:0044455,mitochondrial membrane part|GO:0031967,organelle envelope|GO:0031966,mitochondrial membrane|GO:1903561,e…	GO:0004129,cytochrome-c oxidase activity|GO:0022890,inorganic cation transmembrane transporter activity|GO:0022891,substrate-specific transmembrane transporter activity|GO:0022892,substrate-specific transporter activity|GO:0005215,transporter activity|GO:0008324,cation transmembrane transporter activity|GO:0022857,transmembrane transporter activity|GO:0015075,ion transmembrane transporter activit…	hsa00190,Oxidative phosphorylation|hsa04260,Cardiac muscle contraction|hsa04932,Non-alcoholic fatty liver disease (NAFLD)|hsa05016,Huntington's disease|hsa05010,Alzheimer's disease|hsa05012,Parkinson's disease	http://www.uniprot.org/uniprot/P14406
O15260	1.92905	0.947891	O15260	SURF4	GO:0008104,protein localization|GO:0033043,regulation of organelle organization|GO:0051128,regulation of cellular component organization|GO:0051641,cellular localization|GO:0050789,regulation of biological process|GO:0044699,single-organism process|GO:0070727,cellular macromolecule localization|GO:0071840,cellular component organization or biogenesis|GO:0010256,endomembrane system organization|GO…	GO:0005783,endoplasmic reticulum|GO:0033116,endoplasmic reticulum-Golgi intermediate compartment membrane|GO:0005789,endoplasmic reticulum membrane|GO:0042175,nuclear outer membrane-endoplasmic reticulum membrane network|GO:0043229,intracellular organelle|GO:0005622,intracellular|GO:0043227,membrane-bounded organelle|GO:0043226,organelle|GO:0031224,intrinsic component of membrane|GO:0005737,cytop…	GO:0005488,binding|GO:0005515,protein binding		http://www.uniprot.org/uniprot/O15260
P01871	1.93485	0.952222	P01871	IGHM	GO:0002376,immune system process|GO:0009607,response to biotic stimulus|GO:0043207,response to external biotic stimulus|GO:0019730,antimicrobial humoral response|GO:0019731,antibacterial humoral response|GO:0050896,response to stimulus|GO:0045087,innate immune response|GO:0009617,response to bacterium|GO:0006952,defense response|GO:0006950,response to stress|GO:0098542,defense response to other o…	GO:0071944,cell periphery|GO:0042571,immunoglobulin complex, circulating|GO:0019814,immunoglobulin complex|GO:0043227,membrane-bounded organelle|GO:0043226,organelle|GO:0031224,intrinsic component of membrane|GO:0031982,vesicle|GO:0005615,extracellular space|GO:0016021,integral component of membrane|GO:0016020,membrane|GO:0072562,blood microparticle|GO:0031988,membrane-bounded vesicle|GO:0044425,…	GO:0034987,immunoglobulin receptor binding|GO:1901363,heterocyclic compound binding|GO:0005488,binding|GO:0003676,nucleic acid binding|GO:0003677,DNA binding|GO:0005539,glycosaminoglycan binding|GO:0043168,anion binding|GO:0043169,cation binding|GO:0043566,structure-specific DNA binding|GO:0005543,phospholipid binding|GO:0043167,ion binding|GO:0003697,single-stranded DNA binding|GO:0008289,lipid …		http://www.uniprot.org/uniprot/P01871
O94886	1.9514	0.96451	O94886	TMEM63A	GO:0006811,ion transport|GO:0006810,transport|GO:0044765,single-organism transport|GO:1902578,single-organism localization|GO:0051234,establishment of localization|GO:0051179,localization|GO:0044699,single-organism process	GO:0000323,lytic vacuole|GO:0044421,extracellular region part|GO:0043229,intracellular organelle|GO:0031988,membrane-bounded vesicle|GO:0043227,membrane-bounded organelle|GO:0043226,organelle|GO:0031224,intrinsic component of membrane|GO:0005737,cytoplasm|GO:0044446,intracellular organelle part|GO:0031982,vesicle|GO:0005773,vacuole|GO:0016021,integral component of membrane|GO:0016020,membrane|GO:…	GO:0097159,organic cyclic compound binding|GO:0000166,nucleotide binding|GO:0036094,small molecule binding|GO:0005488,binding|GO:1901363,heterocyclic compound binding|GO:1901265,nucleoside phosphate binding		http://www.uniprot.org/uniprot/O94886
P07954	1.95235	0.965212	P07954	FH	GO:0060249,anatomical structure homeostasis|GO:0019752,carboxylic acid metabolic process|GO:0042592,homeostatic process|GO:0006099,tricarboxylic acid cycle|GO:0009060,aerobic respiration|GO:0044281,small molecule metabolic process|GO:0006091,generation of precursor metabolites and energy|GO:0072350,tricarboxylic acid metabolic process|GO:0044699,single-organism process|GO:0044710,single-organism …	GO:0031974,membrane-enclosed lumen|GO:0043229,intracellular organelle|GO:0043227,membrane-bounded organelle|GO:0043226,organelle|GO:0005737,cytoplasm|GO:0070062,extracellular exosome|GO:0005739,mitochondrion|GO:0031988,membrane-bounded vesicle|GO:0005759,mitochondrial matrix|GO:0045239,tricarboxylic acid cycle enzyme complex|GO:0032991,macromolecular complex|GO:1903561,extracellular vesicle|GO:00…	GO:0016835,carbon-oxygen lyase activity|GO:0016836,hydro-lyase activity|GO:0003824,catalytic activity|GO:0005488,binding|GO:0005515,protein binding|GO:0004333,fumarate hydratase activity|GO:0016829,lyase activity	hsa00620,Pyruvate metabolism|hsa01100,Metabolic pathways|hsa05211,Renal cell carcinoma|hsa05200,Pathways in cancer|hsa01200,Carbon metabolism|hsa01130,Biosynthesis of antibiotics|hsa00020,Citrate cycle (TCA cycle)	http://www.uniprot.org/uniprot/P07954
P01011	1.98375	0.98823	P01011	SERPINA3	GO:0006954,inflammatory response|GO:0007586,digestion|GO:0009892,negative regulation of metabolic process|GO:0080090,regulation of primary metabolic process|GO:0019222,regulation of metabolic process|GO:0060249,anatomical structure homeostasis|GO:0031324,negative regulation of cellular metabolic process|GO:0031323,regulation of cellular metabolic process|GO:0042592,homeostatic process|GO:0022600,…	GO:0043231,intracellular membrane-bounded organelle|GO:0005622,intracellular|GO:0043230,extracellular organelle|GO:0031982,vesicle|GO:0044421,extracellular region part|GO:0043227,membrane-bounded organelle|GO:0005634,nucleus|GO:0044464,cell part|GO:0005623,cell|GO:0031988,membrane-bounded vesicle|GO:0043229,intracellular organelle|GO:0005576,extracellular region|GO:0005615,extracellular space|GO:…	GO:0004866,endopeptidase inhibitor activity|GO:0097159,organic cyclic compound binding|GO:0061135,endopeptidase regulator activity|GO:0061134,peptidase regulator activity|GO:1901363,heterocyclic compound binding|GO:0005515,protein binding|GO:0030414,peptidase inhibitor activity|GO:0004867,serine-type endopeptidase inhibitor activity|GO:0004857,enzyme inhibitor activity|GO:0098772,molecular functi…		http://www.uniprot.org/uniprot/P01011
P21291	2.0437	1.03118	P21291	CSRP1	GO:0016337,single organismal cell-cell adhesion|GO:0007596,blood coagulation|GO:0032501,multicellular organismal process|GO:0007599,hemostasis|GO:0044699,single-organism process|GO:0009611,response to wounding|GO:0065007,biological regulation|GO:0065008,regulation of biological quality|GO:0098602,single organism cell adhesion|GO:0050878,regulation of body fluid levels|GO:0098609,cell-cell adhesio…	GO:0043229,intracellular organelle|GO:0005924,cell-substrate adherens junction|GO:0005925,focal adhesion|GO:0043227,membrane-bounded organelle|GO:0043226,organelle|GO:0030054,cell junction|GO:0030055,cell-substrate junction|GO:0031982,vesicle|GO:0005634,nucleus|GO:0031988,membrane-bounded vesicle|GO:0070161,anchoring junction|GO:0005912,adherens junction|GO:1903561,extracellular vesicle|GO:007006…	GO:0005488,binding|GO:0043169,cation binding|GO:0046914,transition metal ion binding|GO:0097159,organic cyclic compound binding|GO:0044822,poly(A) RNA binding|GO:0043167,ion binding|GO:0008270,zinc ion binding|GO:0003676,nucleic acid binding|GO:0046872,metal ion binding|GO:1901363,heterocyclic compound binding|GO:0003723,RNA binding		http://www.uniprot.org/uniprot/P21291
Q86UX7	2.0582	1.04138	Q86UX7	FERMT3	GO:0022607,cellular component assembly|GO:0016337,single organismal cell-cell adhesion|GO:0034446,substrate adhesion-dependent cell spreading|GO:0043933,macromolecular complex subunit organization|GO:0050896,response to stimulus|GO:0030155,regulation of cell adhesion|GO:0030154,cell differentiation|GO:0048468,cell development|GO:0007596,blood coagulation|GO:0022407,regulation of cell-cell adhesio…	GO:0015629,actin cytoskeleton|GO:0043229,intracellular organelle|GO:0043228,non-membrane-bounded organelle|GO:0005623,cell|GO:0043227,membrane-bounded organelle|GO:0043226,organelle|GO:0030054,cell junction|GO:0005856,cytoskeleton|GO:0002102,podosome|GO:0031982,vesicle|GO:0016020,membrane|GO:0031988,membrane-bounded vesicle|GO:0044430,cytoskeletal part|GO:0032991,macromolecular complex|GO:0042995…	GO:0005178,integrin binding|GO:0044877,macromolecular complex binding|GO:0005488,binding|GO:0005515,protein binding|GO:0032403,protein complex binding|GO:0005102,receptor binding|GO:0050839,cell adhesion molecule binding	hsa04611,Platelet activation	http://www.uniprot.org/uniprot/Q86UX7
Q01469	2.07105	1.05036	Q01469	FABP5	GO:0006656,phosphatidylcholine biosynthetic process|GO:0006650,glycerophospholipid metabolic process|GO:0006950,response to stress|GO:0006639,acylglycerol metabolic process|GO:0006638,neutral lipid metabolic process|GO:0009611,response to wounding|GO:0044248,cellular catabolic process|GO:0044249,cellular biosynthetic process|GO:0034641,cellular nitrogen compound metabolic process|GO:0006807,nitro…	GO:0031974,membrane-enclosed lumen|GO:0043229,intracellular organelle|GO:0043227,membrane-bounded organelle|GO:0043226,organelle|GO:0005737,cytoplasm|GO:0070062,extracellular exosome|GO:0031981,nuclear lumen|GO:0005634,nucleus|GO:0031988,membrane-bounded vesicle|GO:0005654,nucleoplasm|GO:1903561,extracellular vesicle|GO:0031982,vesicle|GO:0043230,extracellular organelle|GO:0043231,intracellular m…	GO:0043168,anion binding|GO:0043177,organic acid binding|GO:0005215,transporter activity|GO:0031406,carboxylic acid binding|GO:0008289,lipid binding|GO:0043167,ion binding|GO:0036094,small molecule binding|GO:0005488,binding|GO:0005515,protein binding|GO:0005504,fatty acid binding|GO:0033293,monocarboxylic acid binding	hsa03320,PPAR signaling pathway	http://www.uniprot.org/uniprot/Q01469
Q96CW1	2.09115	1.0643	Q96CW1	AP2M1	GO:0002495,antigen processing and presentation of peptide antigen via MHC class II|GO:0008104,protein localization|GO:0050688,regulation of defense response to virus|GO:0048585,negative regulation of response to stimulus|GO:0048583,regulation of response to stimulus|GO:0061024,membrane organization|GO:0007009,plasma membrane organization|GO:0007165,signal transduction|GO:0007166,cell surface rece…	GO:0098796,membrane protein complex|GO:0000323,lytic vacuole|GO:0044464,cell part|GO:0030139,endocytic vesicle|GO:0043229,intracellular organelle|GO:0071944,cell periphery|GO:0030117,membrane coat|GO:0005905,coated pit|GO:0005773,vacuole|GO:0030131,clathrin adaptor complex|GO:0030119,AP-type membrane coat adaptor complex|GO:0005774,vacuolar membrane|GO:0030135,coated vesicle|GO:0043226,organelle|…	GO:0030674,protein binding, bridging|GO:0042277,peptide binding|GO:0005048,signal sequence binding|GO:0005215,transporter activity|GO:0008289,lipid binding|GO:0070325,lipoprotein particle receptor binding|GO:0098748,endocytic adaptor activity|GO:0005488,binding|GO:0005515,protein binding|GO:0033218,amide binding|GO:0030276,clathrin binding|GO:0005102,receptor binding|GO:0050750,low-density lipopr…	hsa04721,Synaptic vesicle cycle|hsa05016,Huntington's disease|hsa04961,Endocrine and other factor-regulated calcium reabsorption|hsa04144,Endocytosis	http://www.uniprot.org/uniprot/Q96CW1
O00483	2.2822	1.19043	O00483	NDUFA4	GO:0051234,establishment of localization|GO:1902600,hydrogen ion transmembrane transport|GO:0009141,nucleoside triphosphate metabolic process|GO:0009144,purine nucleoside triphosphate metabolic process|GO:0009167,purine ribonucleoside monophosphate metabolic process|GO:0034641,cellular nitrogen compound metabolic process|GO:0006807,nitrogen compound metabolic process|GO:0044281,small molecule met…	GO:0044464,cell part|GO:0031090,organelle membrane|GO:1990204,oxidoreductase complex|GO:0043229,intracellular organelle|GO:0070069,cytochrome complex|GO:0031988,membrane-bounded vesicle|GO:0043227,membrane-bounded organelle|GO:0043226,organelle|GO:0005737,cytoplasm|GO:0005751,mitochondrial respiratory chain complex IV|GO:0031982,vesicle|GO:0098796,membrane protein complex|GO:0031975,envelope|GO:0…	GO:0044877,macromolecular complex binding|GO:0005488,binding|GO:0003954,NADH dehydrogenase activity|GO:0016491,oxidoreductase activity|GO:0015077,monovalent inorganic cation transmembrane transporter activity|GO:0050136,NADH dehydrogenase (quinone) activity|GO:0008137,NADH dehydrogenase (ubiquinone) activity|GO:0032403,protein complex binding|GO:0015002,heme-copper terminal oxidase activity|GO:00…	hsa00190,Oxidative phosphorylation|hsa01100,Metabolic pathways|hsa04932,Non-alcoholic fatty liver disease (NAFLD)|hsa05016,Huntington's disease|hsa05010,Alzheimer's disease|hsa05012,Parkinson's disease	http://www.uniprot.org/uniprot/O00483
Q13642	2.3069	1.20596	Q13642	FHL1	GO:0000086,G2/M transition of mitotic cell cycle|GO:0051049,regulation of transport|GO:0000082,G1/S transition of mitotic cell cycle|GO:0032844,regulation of homeostatic process|GO:0051899,membrane depolarization|GO:0034765,regulation of ion transmembrane transport|GO:0034762,regulation of transmembrane transport|GO:0007517,muscle organ development|GO:0045786,negative regulation of cell cycle|GO:…	GO:0043229,intracellular organelle|GO:0071944,cell periphery|GO:0005924,cell-substrate adherens junction|GO:0005925,focal adhesion|GO:0043227,membrane-bounded organelle|GO:0043226,organelle|GO:0030054,cell junction|GO:0030055,cell-substrate junction|GO:0005737,cytoplasm|GO:0005634,nucleus|GO:0016020,membrane|GO:0070161,anchoring junction|GO:0005912,adherens junction|GO:0005886,plasma membrane|GO:…	GO:0043169,cation binding|GO:0046914,transition metal ion binding|GO:0043167,ion binding|GO:0008270,zinc ion binding|GO:0005515,protein binding|GO:0044325,ion channel binding|GO:0046872,metal ion binding|GO:0005488,binding		http://www.uniprot.org/uniprot/Q13642
P13501	2.35515	1.23582	P13501	CCL5	GO:0051046,regulation of secretion|GO:0051049,regulation of transport|GO:0019058,viral life cycle|GO:0043933,macromolecular complex subunit organization|GO:0044281,small molecule metabolic process|GO:0098771,inorganic ion homeostasis|GO:0043200,response to amino acid|GO:0051716,cellular response to stimulus|GO:0043207,response to external biotic stimulus|GO:0000165,MAPK cascade|GO:0030595,leukocy…	GO:0005737,cytoplasm|GO:0005615,extracellular space|GO:0044464,cell part|GO:0005623,cell|GO:0005622,intracellular|GO:0005576,extracellular region|GO:0044424,intracellular part|GO:0044421,extracellular region part	GO:0005126,cytokine receptor binding|GO:0042056,chemoattractant activity|GO:0005125,cytokine activity|GO:0019207,kinase regulator activity|GO:0008009,chemokine activity|GO:0019209,kinase activator activity|GO:0042578,phosphoric ester hydrolase activity|GO:0046983,protein dimerization activity|GO:0008047,enzyme activator activity|GO:0001664,G-protein coupled receptor binding|GO:0098772,molecular f…	hsa05120,Epithelial cell signaling in Helicobacter pylori infection|hsa05323,Rheumatoid arthritis|hsa04620,Toll-like receptor signaling pathway|hsa04621,NOD-like receptor signaling pathway|hsa04623,Cytosolic DNA-sensing pathway|hsa05142,Chagas disease (American trypanosomiasis)|hsa05164,Influenza A|hsa05168,Herpes simplex infection|hsa05020,Prion diseases|hsa04668,TNF signaling pathway|hsa04062,C…	http://www.uniprot.org/uniprot/P13501
Q99943	2.3868	1.25508	Q99943	AGPAT1	GO:0042221,response to chemical|GO:0006654,phosphatidic acid biosynthetic process|GO:0044707,single-multicellular organism process|GO:0019221,cytokine-mediated signaling pathway|GO:0019222,regulation of metabolic process|GO:0031325,positive regulation of cellular metabolic process|GO:0048584,positive regulation of response to stimulus|GO:0031323,regulation of cellular metabolic process|GO:0023056…	GO:0005783,endoplasmic reticulum|GO:0005789,endoplasmic reticulum membrane|GO:0042175,nuclear outer membrane-endoplasmic reticulum membrane network|GO:0043229,intracellular organelle|GO:0043227,membrane-bounded organelle|GO:0043226,organelle|GO:0031224,intrinsic component of membrane|GO:0005737,cytoplasm|GO:0031090,organelle membrane|GO:0016021,integral component of membrane|GO:0016020,membrane|G…	GO:0005488,binding|GO:0016740,transferase activity|GO:0003824,catalytic activity|GO:0003841,1-acylglycerol-3-phosphate O-acyltransferase activity|GO:0071617,lysophospholipid acyltransferase activity|GO:0016747,transferase activity, transferring acyl groups other than amino-acyl groups|GO:0005515,protein binding|GO:0016411,acylglycerol O-acyltransferase activity|GO:0008374,O-acyltransferase activi…	hsa00561,Glycerolipid metabolism|hsa04975,Fat digestion and absorption|hsa01100,Metabolic pathways|hsa00564,Glycerophospholipid metabolism	http://www.uniprot.org/uniprot/Q99943
P59998	3.9024	1.96436	P59998	ARPC4	GO:0006909,phagocytosis|GO:0048584,positive regulation of response to stimulus|GO:0048583,regulation of response to stimulus|GO:0008064,regulation of actin polymerization or depolymerization|GO:0007165,signal transduction|GO:0007166,cell surface receptor signaling pathway|GO:0007167,enzyme linked receptor protein signaling pathway|GO:0030182,neuron differentiation|GO:0007169,transmembrane recepto…	GO:0015629,actin cytoskeleton|GO:0043229,intracellular organelle|GO:0043228,non-membrane-bounded organelle|GO:0043227,membrane-bounded organelle|GO:0043226,organelle|GO:0005856,cytoskeleton|GO:1903561,extracellular vesicle|GO:0031982,vesicle|GO:0031988,membrane-bounded vesicle|GO:0044430,cytoskeletal part|GO:0005737,cytoplasm|GO:0005885,Arp2/3 protein complex|GO:0032991,macromolecular complex|GO:…	GO:0005488,binding|GO:0030674,protein binding, bridging|GO:0005200,structural constituent of cytoskeleton|GO:0008092,cytoskeletal protein binding|GO:0051015,actin filament binding|GO:0005198,structural molecule activity|GO:0003779,actin binding|GO:0044877,macromolecular complex binding|GO:0019899,enzyme binding|GO:0005515,protein binding|GO:0032403,protein complex binding|GO:0060090,binding, brid…	hsa05132,Salmonella infection|hsa05131,Shigellosis|hsa05130,Pathogenic Escherichia coli infection|hsa05100,Bacterial invasion of epithelial cells|hsa04144,Endocytosis|hsa04666,Fc gamma R-mediated phagocytosis|hsa04810,Regulation of actin cytoskeleton	http://www.uniprot.org/uniprot/P59998

## Sheet: C-A
ID	FoldChange	Log2FoldChange	Uniprot	Genename	Biological Process	Cell Component	Molecular Function	KEGG Pathways	UNIPROT_URL
Q71U36	0.2452	-2.02797	Q71U36	TUBA1A	GO:0022607,cellular component assembly|GO:0006457,protein folding|GO:0044839,cell cycle G2/M phase transition|GO:0070271,protein complex biogenesis|GO:0000086,G2/M transition of mitotic cell cycle|GO:0006458,'de novo' protein folding|GO:1903047,mitotic cell cycle process|GO:0044770,cell cycle phase transition|GO:0044772,mitotic cell cycle phase transition|GO:0022402,cell cycle process|GO:0034622,…	GO:0035770,ribonucleoprotein granule|GO:0055037,recycling endosome|GO:0043229,intracellular organelle|GO:0043228,non-membrane-bounded organelle|GO:0036464,cytoplasmic ribonucleoprotein granule|GO:0030529,ribonucleoprotein complex|GO:0005874,microtubule|GO:0043226,organelle|GO:0005856,cytoskeleton|GO:0031982,vesicle|GO:0043209,myelin sheath|GO:0043227,membrane-bounded organelle|GO:0005634,nucleus|…	GO:0005200,structural constituent of cytoskeleton|GO:0035639,purine ribonucleoside triphosphate binding|GO:0005488,binding|GO:0005198,structural molecule activity|GO:1901363,heterocyclic compound binding|GO:1901265,nucleoside phosphate binding|GO:0001882,nucleoside binding|GO:0043168,anion binding|GO:0016462,pyrophosphatase activity|GO:0000166,nucleotide binding|GO:0032561,guanyl ribonucleotide b…	hsa05130,Pathogenic Escherichia coli infection|hsa04145,Phagosome|hsa04540,Gap junction	http://www.uniprot.org/uniprot/Q71U36
Q9H4B7	0.25505	-1.97115	Q9H4B7	TUBB1	GO:0022607,cellular component assembly|GO:0006457,protein folding|GO:0070271,protein complex biogenesis|GO:0043933,macromolecular complex subunit organization|GO:0006458,'de novo' protein folding|GO:0000226,microtubule cytoskeleton organization|GO:0034622,cellular macromolecular complex assembly|GO:0051225,spindle assembly|GO:0044699,single-organism process|GO:0044267,cellular protein metabolic p…	GO:0043229,intracellular organelle|GO:0043228,non-membrane-bounded organelle|GO:0005874,microtubule|GO:0043226,organelle|GO:0005856,cytoskeleton|GO:0031982,vesicle|GO:0043227,membrane-bounded organelle|GO:0031988,membrane-bounded vesicle|GO:0044430,cytoskeletal part|GO:0005737,cytoplasm|GO:0015630,microtubule cytoskeleton|GO:0032991,macromolecular complex|GO:1903561,extracellular vesicle|GO:00700…	GO:0005200,structural constituent of cytoskeleton|GO:0035639,purine ribonucleoside triphosphate binding|GO:0005488,binding|GO:0005198,structural molecule activity|GO:1901363,heterocyclic compound binding|GO:1901265,nucleoside phosphate binding|GO:0001882,nucleoside binding|GO:0043168,anion binding|GO:0016462,pyrophosphatase activity|GO:0000166,nucleotide binding|GO:0032561,guanyl ribonucleotide b…	hsa05130,Pathogenic Escherichia coli infection|hsa04145,Phagosome|hsa04540,Gap junction	http://www.uniprot.org/uniprot/Q9H4B7
Q9BQE3	0.27045	-1.88657	Q9BQE3	TUBA1C	GO:0022607,cellular component assembly|GO:0006457,protein folding|GO:0070271,protein complex biogenesis|GO:0043933,macromolecular complex subunit organization|GO:0006458,'de novo' protein folding|GO:0051301,cell division|GO:0034622,cellular macromolecular complex assembly|GO:0044699,single-organism process|GO:0044267,cellular protein metabolic process|GO:0071822,protein complex subunit organizati…	GO:0043229,intracellular organelle|GO:0043228,non-membrane-bounded organelle|GO:0043227,membrane-bounded organelle|GO:0043226,organelle|GO:0005856,cytoskeleton|GO:0031982,vesicle|GO:0005874,microtubule|GO:0005634,nucleus|GO:0044430,cytoskeletal part|GO:0005737,cytoplasm|GO:0015630,microtubule cytoskeleton|GO:0005881,cytoplasmic microtubule|GO:0043234,protein complex|GO:0032991,macromolecular comp…	GO:0005200,structural constituent of cytoskeleton|GO:0035639,purine ribonucleoside triphosphate binding|GO:0005488,binding|GO:0005198,structural molecule activity|GO:1901363,heterocyclic compound binding|GO:1901265,nucleoside phosphate binding|GO:0001882,nucleoside binding|GO:0043168,anion binding|GO:0016462,pyrophosphatase activity|GO:0000166,nucleotide binding|GO:0032561,guanyl ribonucleotide b…	hsa05130,Pathogenic Escherichia coli infection|hsa04145,Phagosome|hsa04540,Gap junction	http://www.uniprot.org/uniprot/Q9BQE3
P68366	0.33945	-1.55873	P68366	TUBA4A	GO:0022607,cellular component assembly|GO:0007599,hemostasis|GO:0044839,cell cycle G2/M phase transition|GO:0070271,protein complex biogenesis|GO:0000086,G2/M transition of mitotic cell cycle|GO:0044699,single-organism process|GO:0007596,blood coagulation|GO:1903047,mitotic cell cycle process|GO:0044770,cell cycle phase transition|GO:0032940,secretion by cell|GO:0022402,cell cycle process|GO:0051…	GO:0043229,intracellular organelle|GO:0043228,non-membrane-bounded organelle|GO:0005874,microtubule|GO:0043226,organelle|GO:0005856,cytoskeleton|GO:0031982,vesicle|GO:0043227,membrane-bounded organelle|GO:0031988,membrane-bounded vesicle|GO:0044430,cytoskeletal part|GO:0005737,cytoplasm|GO:0015630,microtubule cytoskeleton|GO:0032991,macromolecular complex|GO:1903561,extracellular vesicle|GO:00700…	GO:0005200,structural constituent of cytoskeleton|GO:0035639,purine ribonucleoside triphosphate binding|GO:0005488,binding|GO:0005198,structural molecule activity|GO:1901363,heterocyclic compound binding|GO:1901265,nucleoside phosphate binding|GO:0001882,nucleoside binding|GO:0043168,anion binding|GO:0016462,pyrophosphatase activity|GO:0000166,nucleotide binding|GO:0032561,guanyl ribonucleotide b…	hsa05130,Pathogenic Escherichia coli infection|hsa04145,Phagosome|hsa04540,Gap junction	http://www.uniprot.org/uniprot/P68366
P07437	0.36415	-1.4574	P07437	TUBB	GO:0022607,cellular component assembly|GO:0044839,cell cycle G2/M phase transition|GO:0070271,protein complex biogenesis|GO:0000086,G2/M transition of mitotic cell cycle|GO:0006955,immune response|GO:1903047,mitotic cell cycle process|GO:0006928,movement of cell or subcellular component|GO:0044770,cell cycle phase transition|GO:0044772,mitotic cell cycle phase transition|GO:0022402,cell cycle pro…	GO:0035770,ribonucleoprotein granule|GO:0044421,extracellular region part|GO:0031970,organelle envelope lumen|GO:0031974,membrane-enclosed lumen|GO:0031975,envelope|GO:0043229,intracellular organelle|GO:0043228,non-membrane-bounded organelle|GO:0036464,cytoplasmic ribonucleoprotein granule|GO:0030529,ribonucleoprotein complex|GO:0005874,microtubule|GO:0043226,organelle|GO:0005856,cytoskeleton|GO:…	GO:0005200,structural constituent of cytoskeleton|GO:0044389,ubiquitin-like protein ligase binding|GO:0035639,purine ribonucleoside triphosphate binding|GO:0032794,GTPase activating protein binding|GO:0019899,enzyme binding|GO:0044877,macromolecular complex binding|GO:0005488,binding|GO:0000166,nucleotide binding|GO:1901363,heterocyclic compound binding|GO:0001883,purine nucleoside binding|GO:000…	hsa05130,Pathogenic Escherichia coli infection|hsa04145,Phagosome|hsa04540,Gap junction	http://www.uniprot.org/uniprot/P07437
P19105	0.44015	-1.18393	P19105	MYL12A	GO:0008104,protein localization|GO:0007599,hemostasis|GO:0007596,blood coagulation|GO:0048468,cell development|GO:0061024,membrane organization|GO:0007009,plasma membrane organization|GO:0007165,signal transduction|GO:0007166,cell surface receptor signaling pathway|GO:0007167,enzyme linked receptor protein signaling pathway|GO:0007169,transmembrane receptor protein tyrosine kinase signaling pathw…	GO:0032432,actin filament bundle|GO:0015629,actin cytoskeleton|GO:0030016,myofibril|GO:0030017,sarcomere|GO:0043229,intracellular organelle|GO:0043228,non-membrane-bounded organelle|GO:0044430,cytoskeletal part|GO:0043227,membrane-bounded organelle|GO:0043226,organelle|GO:0030018,Z disc|GO:0042641,actomyosin|GO:0005856,cytoskeleton|GO:0001725,stress fiber|GO:0031982,vesicle|GO:0031674,I band|GO:0…	GO:0043169,cation binding|GO:0035254,glutamate receptor binding|GO:0043167,ion binding|GO:0005509,calcium ion binding|GO:0005515,protein binding|GO:0005102,receptor binding|GO:0046872,metal ion binding|GO:0005488,binding	hsa04530,Tight junction|hsa04670,Leukocyte transendothelial migration|hsa04611,Platelet activation|hsa04510,Focal adhesion|hsa04810,Regulation of actin cytoskeleton	http://www.uniprot.org/uniprot/P19105
P07951	0.46125	-1.11638	P07951	TPM2	GO:0019222,regulation of metabolic process|GO:0006928,movement of cell or subcellular component|GO:0003012,muscle system process|GO:0032501,multicellular organismal process|GO:0050789,regulation of biological process|GO:0044699,single-organism process|GO:0043462,regulation of ATPase activity|GO:0006936,muscle contraction|GO:0033275,actin-myosin filament sliding|GO:0065007,biological regulation|GO…	GO:0015629,actin cytoskeleton|GO:0030016,myofibril|GO:0030017,sarcomere|GO:0043229,intracellular organelle|GO:0043228,non-membrane-bounded organelle|GO:0043226,organelle|GO:0005856,cytoskeleton|GO:0044430,cytoskeletal part|GO:0005737,cytoplasm|GO:0044424,intracellular part|GO:0005865,striated muscle thin filament|GO:0005862,muscle thin filament tropomyosin|GO:0036379,myofilament|GO:0043232,intrac…	GO:0008092,cytoskeletal protein binding|GO:0005198,structural molecule activity|GO:0003779,actin binding|GO:0008307,structural constituent of muscle|GO:0005488,binding|GO:0005515,protein binding	hsa05410,Hypertrophic cardiomyopathy (HCM)|hsa05414,Dilated cardiomyopathy|hsa04260,Cardiac muscle contraction|hsa04261,Adrenergic signaling in cardiomyocytes	http://www.uniprot.org/uniprot/P07951
Q8NG06	0.46635	-1.10051	Q8NG06	TRIM58	GO:0071704,organic substance metabolic process|GO:0044267,cellular protein metabolic process|GO:0044238,primary metabolic process|GO:0044260,cellular macromolecule metabolic process|GO:0032446,protein modification by small protein conjugation|GO:0019538,protein metabolic process|GO:0009987,cellular process|GO:0070647,protein modification by small protein conjugation or removal|GO:0006464,cellular…	GO:0044464,cell part|GO:0005623,cell|GO:0005622,intracellular	GO:0043169,cation binding|GO:0046914,transition metal ion binding|GO:0043167,ion binding|GO:0003824,catalytic activity|GO:0008270,zinc ion binding|GO:0046872,metal ion binding|GO:0016874,ligase activity|GO:0005488,binding		http://www.uniprot.org/uniprot/Q8NG06
P40197	0.4721	-1.08284	P40197	GP5	GO:0032102,negative regulation of response to external stimulus|GO:0008152,metabolic process|GO:0032101,regulation of response to external stimulus|GO:0050865,regulation of cell activation|GO:0048585,negative regulation of response to stimulus|GO:0050866,negative regulation of cell activation|GO:0048583,regulation of response to stimulus|GO:0009611,response to wounding|GO:0007160,cell-matrix adhe…	GO:0071944,cell periphery|GO:0031226,intrinsic component of plasma membrane|GO:0043226,organelle|GO:0031224,intrinsic component of membrane|GO:0031982,vesicle|GO:0043227,membrane-bounded organelle|GO:0016021,integral component of membrane|GO:0016020,membrane|GO:0031988,membrane-bounded vesicle|GO:0044459,plasma membrane part|GO:0005887,integral component of plasma membrane|GO:0005886,plasma membr…	GO:0005488,binding|GO:0005515,protein binding|GO:0032403,protein complex binding|GO:0044877,macromolecular complex binding|GO:0005518,collagen binding	hsa04611,Platelet activation|hsa04512,ECM-receptor interaction|hsa04640,Hematopoietic cell lineage	http://www.uniprot.org/uniprot/P40197
O95433	0.48145	-1.05454	O95433	AHSA1	GO:0051336,regulation of hydrolase activity|GO:0043462,regulation of ATPase activity|GO:0009893,positive regulation of metabolic process|GO:0051345,positive regulation of hydrolase activity|GO:0065009,regulation of molecular function|GO:0032781,positive regulation of ATPase activity|GO:0050896,response to stimulus|GO:0050790,regulation of catalytic activity|GO:0008152,metabolic process|GO:0006950…	GO:0005783,endoplasmic reticulum|GO:0043229,intracellular organelle|GO:0043227,membrane-bounded organelle|GO:0043226,organelle|GO:0005737,cytoplasm|GO:0031982,vesicle|GO:0031988,membrane-bounded vesicle|GO:0012505,endomembrane system|GO:1903561,extracellular vesicle|GO:0070062,extracellular exosome|GO:0043230,extracellular organelle|GO:0043231,intracellular membrane-bounded organelle|GO:0005829,c…	GO:0005488,binding|GO:0005515,protein binding|GO:0030234,enzyme regulator activity|GO:0051087,chaperone binding|GO:0008047,enzyme activator activity|GO:0060590,ATPase regulator activity|GO:0098772,molecular function regulator|GO:0060589,nucleoside-triphosphatase regulator activity|GO:0001671,ATPase activator activity		http://www.uniprot.org/uniprot/O95433
Q9NY65	0.4847	-1.04484	Q9NY65	TUBA8	GO:0051258,protein polymerization|GO:0007017,microtubule-based process|GO:0071822,protein complex subunit organization|GO:0070271,protein complex biogenesis|GO:0043933,macromolecular complex subunit organization|GO:0006461,protein complex assembly|GO:0016043,cellular component organization|GO:0065003,macromolecular complex assembly|GO:0022607,cellular component assembly|GO:0044763,single-organism…	GO:0005856,cytoskeleton|GO:0043234,protein complex|GO:0015630,microtubule cytoskeleton|GO:0043228,non-membrane-bounded organelle|GO:0043232,intracellular non-membrane-bounded organelle|GO:0044464,cell part|GO:0005623,cell|GO:0005737,cytoplasm|GO:0044446,intracellular organelle part|GO:0043229,intracellular organelle|GO:0044430,cytoskeletal part|GO:0044424,intracellular part|GO:0032991,macromolecu…	GO:0005200,structural constituent of cytoskeleton|GO:0035639,purine ribonucleoside triphosphate binding|GO:0005488,binding|GO:0005198,structural molecule activity|GO:1901363,heterocyclic compound binding|GO:1901265,nucleoside phosphate binding|GO:0001882,nucleoside binding|GO:0043168,anion binding|GO:0016462,pyrophosphatase activity|GO:0000166,nucleotide binding|GO:0032561,guanyl ribonucleotide b…	hsa05130,Pathogenic Escherichia coli infection|hsa04145,Phagosome|hsa04540,Gap junction	http://www.uniprot.org/uniprot/Q9NY65
B2RUZ4	0.49215	-1.02283	B2RUZ4	SMIM1		GO:0043230,extracellular organelle|GO:0031982,vesicle|GO:0044421,extracellular region part|GO:0043227,membrane-bounded organelle|GO:0016021,integral component of membrane|GO:0016020,membrane|GO:0031988,membrane-bounded vesicle|GO:0005576,extracellular region|GO:0044425,membrane part|GO:1903561,extracellular vesicle|GO:0065010,extracellular membrane-bounded organelle|GO:0043226,organelle|GO:003122…			http://www.uniprot.org/uniprot/B2RUZ4
P60660	0.4995	-1.00144	P60660	MYL6	GO:0006936,muscle contraction|GO:0044707,single-multicellular organism process|GO:0030030,cell projection organization|GO:0007167,enzyme linked receptor protein signaling pathway|GO:0048468,cell development|GO:0006928,movement of cell or subcellular component|GO:0003012,muscle system process|GO:0032501,multicellular organismal process|GO:0023052,signaling|GO:0007165,signal transduction|GO:0007166…	GO:0015629,actin cytoskeleton|GO:0043229,intracellular organelle|GO:0005903,brush border|GO:0044430,cytoskeletal part|GO:0043227,membrane-bounded organelle|GO:0043226,organelle|GO:0005856,cytoskeleton|GO:0042995,cell projection|GO:0031982,vesicle|GO:0016020,membrane|GO:0044444,cytoplasmic part|GO:0031988,membrane-bounded vesicle|GO:0016459,myosin complex|GO:0005576,extracellular region|GO:0005737…	GO:0016787,hydrolase activity|GO:0016818,hydrolase activity, acting on acid anhydrides, in phosphorus-containing anhydrides|GO:0016817,hydrolase activity, acting on acid anhydrides|GO:0005515,protein binding|GO:0042623,ATPase activity, coupled|GO:0003824,catalytic activity|GO:0043167,ion binding|GO:0017111,nucleoside-triphosphatase activity|GO:0030898,actin-dependent ATPase activity|GO:0005198,st…	hsa04921,Oxytocin signaling pathway|hsa04270,Vascular smooth muscle contraction	http://www.uniprot.org/uniprot/P60660
P68371	0.5059	-0.983076	P68371	TUBB4B	GO:0022607,cellular component assembly|GO:0006457,protein folding|GO:0044839,cell cycle G2/M phase transition|GO:0070271,protein complex biogenesis|GO:0000086,G2/M transition of mitotic cell cycle|GO:0006458,'de novo' protein folding|GO:1903047,mitotic cell cycle process|GO:0006928,movement of cell or subcellular component|GO:0044770,cell cycle phase transition|GO:0044772,mitotic cell cycle phase…	GO:0043229,intracellular organelle|GO:0043228,non-membrane-bounded organelle|GO:0005874,microtubule|GO:0043226,organelle|GO:0005856,cytoskeleton|GO:0031982,vesicle|GO:0043209,myelin sheath|GO:0043227,membrane-bounded organelle|GO:0005634,nucleus|GO:0031988,membrane-bounded vesicle|GO:0044430,cytoskeletal part|GO:0005737,cytoplasm|GO:0015630,microtubule cytoskeleton|GO:0032991,macromolecular compl…	GO:0005200,structural constituent of cytoskeleton|GO:0035639,purine ribonucleoside triphosphate binding|GO:0005488,binding|GO:0003676,nucleic acid binding|GO:0000166,nucleotide binding|GO:1901363,heterocyclic compound binding|GO:0001883,purine nucleoside binding|GO:0001882,nucleoside binding|GO:0043168,anion binding|GO:0016462,pyrophosphatase activity|GO:0051082,unfolded protein binding|GO:000519…	hsa05130,Pathogenic Escherichia coli infection|hsa04145,Phagosome|hsa04540,Gap junction	http://www.uniprot.org/uniprot/P68371
Q15149	0.5233	-0.93429	Q15149	PLEC	GO:0016265,death|GO:0034330,cell junction organization|GO:0022607,cellular component assembly|GO:0043062,extracellular structure organization|GO:0006921,cellular component disassembly involved in execution phase of apoptosis|GO:0097194,execution phase of apoptosis|GO:0031581,hemidesmosome assembly|GO:0006915,apoptotic process|GO:0016043,cellular component organization|GO:0009987,cellular process|…	GO:0030016,myofibril|GO:0043229,intracellular organelle|GO:0043228,non-membrane-bounded organelle|GO:0005924,cell-substrate adherens junction|GO:0005925,focal adhesion|GO:0043227,membrane-bounded organelle|GO:0043226,organelle|GO:0030054,cell junction|GO:0030055,cell-substrate junction|GO:0005856,cytoskeleton|GO:0045111,intermediate filament cytoskeleton|GO:0042995,cell projection|GO:0031982,vesi…	GO:0005515,protein binding|GO:0008092,cytoskeletal protein binding|GO:0097159,organic cyclic compound binding|GO:0044822,poly(A) RNA binding|GO:0005198,structural molecule activity|GO:0003779,actin binding|GO:0008307,structural constituent of muscle|GO:0003723,RNA binding|GO:0003676,nucleic acid binding|GO:1901363,heterocyclic compound binding|GO:0030506,ankyrin binding|GO:0005488,binding		http://www.uniprot.org/uniprot/Q15149
P05166	0.5276	-0.922484	P05166	PCCB	GO:0034440,lipid oxidation|GO:0006631,fatty acid metabolic process|GO:0006635,fatty acid beta-oxidation|GO:0019752,carboxylic acid metabolic process|GO:0044248,cellular catabolic process|GO:0009062,fatty acid catabolic process|GO:0034641,cellular nitrogen compound metabolic process|GO:0006807,nitrogen compound metabolic process|GO:0044281,small molecule metabolic process|GO:0044282,small molecule…	GO:0005737,cytoplasm|GO:0043231,intracellular membrane-bounded organelle|GO:0043233,organelle lumen|GO:0005829,cytosol|GO:0044464,cell part|GO:0044444,cytoplasmic part|GO:0031974,membrane-enclosed lumen|GO:0005622,intracellular|GO:0044446,intracellular organelle part|GO:0070013,intracellular organelle lumen|GO:0043229,intracellular organelle|GO:0005739,mitochondrion|GO:0044429,mitochondrial part|…	GO:0035639,purine ribonucleoside triphosphate binding|GO:0016885,ligase activity, forming carbon-carbon bonds|GO:0005488,binding|GO:0043167,ion binding|GO:1901363,heterocyclic compound binding|GO:1901265,nucleoside phosphate binding|GO:0001882,nucleoside binding|GO:0043168,anion binding|GO:0004658,propionyl-CoA carboxylase activity|GO:0000166,nucleotide binding|GO:0001883,purine nucleoside bindin…	hsa01100,Metabolic pathways|hsa00630,Glyoxylate and dicarboxylate metabolism|hsa01200,Carbon metabolism|hsa00280,Valine, leucine and isoleucine degradation|hsa01130,Biosynthesis of antibiotics|hsa00640,Propanoate metabolism	http://www.uniprot.org/uniprot/P05166
Q99418	0.5329	-0.908063	Q99418	CYTH2	GO:0006810,transport|GO:0009893,positive regulation of metabolic process|GO:0019222,regulation of metabolic process|GO:0030155,regulation of cell adhesion|GO:0048583,regulation of response to stimulus|GO:0030036,actin cytoskeleton organization|GO:0006897,endocytosis|GO:0023052,signaling|GO:0007165,signal transduction|GO:0023051,regulation of signaling|GO:0051234,establishment of localization|GO:0…	GO:0044463,cell projection part|GO:0030427,site of polarized growth|GO:0030426,growth cone|GO:0043229,intracellular organelle|GO:0071944,cell periphery|GO:0043227,membrane-bounded organelle|GO:0043226,organelle|GO:0005737,cytoplasm|GO:0031984,organelle subcompartment|GO:0016020,membrane|GO:0097458,neuron part|GO:0044431,Golgi apparatus part|GO:0043005,neuron projection|GO:0005794,Golgi apparatus|…	GO:0043168,anion binding|GO:0070679,inositol 1,4,5 trisphosphate binding|GO:0043178,alcohol binding|GO:0005085,guanyl-nucleotide exchange factor activity|GO:0008289,lipid binding|GO:0043167,ion binding|GO:0036094,small molecule binding|GO:0005488,binding|GO:0005515,protein binding|GO:0098772,molecular function regulator|GO:0005086,ARF guanyl-nucleotide exchange factor activity	hsa04144,Endocytosis	http://www.uniprot.org/uniprot/Q99418
O43681	0.5531	-0.854388	O43681	ASNA1	GO:0044238,primary metabolic process|GO:0061024,membrane organization|GO:0006820,anion transport|GO:0008104,protein localization|GO:0023052,signaling|GO:0007165,signal transduction|GO:0070887,cellular response to chemical stimulus|GO:0042221,response to chemical|GO:0050789,regulation of biological process|GO:0044699,single-organism process|GO:0044267,cellular protein metabolic process|GO:0051716,…	GO:0005783,endoplasmic reticulum|GO:0031974,membrane-enclosed lumen|GO:0005789,endoplasmic reticulum membrane|GO:0042175,nuclear outer membrane-endoplasmic reticulum membrane network|GO:0043229,intracellular organelle|GO:0043228,non-membrane-bounded organelle|GO:0043227,membrane-bounded organelle|GO:0043226,organelle|GO:0005737,cytoplasm|GO:0070062,extracellular exosome|GO:0031981,nuclear lumen|G…	GO:0035639,purine ribonucleoside triphosphate binding|GO:0005488,binding|GO:0016887,ATPase activity|GO:0043167,ion binding|GO:1901363,heterocyclic compound binding|GO:0001883,purine nucleoside binding|GO:0001882,nucleoside binding|GO:0043168,anion binding|GO:0043169,cation binding|GO:0008509,anion transmembrane transporter activity|GO:0000166,nucleotide binding|GO:0015105,arsenite transmembrane t…		http://www.uniprot.org/uniprot/O43681
P09486	0.56555	-0.822274	P09486	SPARC	GO:0001503,ossification|GO:0009628,response to abiotic stimulus|GO:0007599,hemostasis|GO:0007596,blood coagulation|GO:0050680,negative regulation of epithelial cell proliferation|GO:0001501,skeletal system development|GO:0072359,circulatory system development|GO:0072358,cardiovascular system development|GO:0007165,signal transduction|GO:0014074,response to purine-containing compound|GO:0044707,si…	GO:0044421,extracellular region part|GO:0005886,plasma membrane|GO:0031974,membrane-enclosed lumen|GO:0031012,extracellular matrix|GO:0030139,endocytic vesicle|GO:0043229,intracellular organelle|GO:0071944,cell periphery|GO:0060205,cytoplasmic membrane-bounded vesicle lumen|GO:0043227,membrane-bounded organelle|GO:0043226,organelle|GO:0034399,nuclear periphery|GO:0030667,secretory granule membran…	GO:0043169,cation binding|GO:0005518,collagen binding|GO:0050840,extracellular matrix binding|GO:0043167,ion binding|GO:0044877,macromolecular complex binding|GO:0005509,calcium ion binding|GO:0005515,protein binding|GO:0032403,protein complex binding|GO:0046872,metal ion binding|GO:0005488,binding		http://www.uniprot.org/uniprot/P09486
Q9NX76	0.56685	-0.818961	Q9NX76	CMTM6	GO:0040011,locomotion|GO:0006935,chemotaxis|GO:0042330,taxis|GO:0050896,response to stimulus|GO:0042221,response to chemical|GO:0009605,response to external stimulus	GO:0043230,extracellular organelle|GO:0031982,vesicle|GO:0044421,extracellular region part|GO:0043227,membrane-bounded organelle|GO:0016021,integral component of membrane|GO:0016020,membrane|GO:0031988,membrane-bounded vesicle|GO:0005576,extracellular region|GO:0005615,extracellular space|GO:0044425,membrane part|GO:1903561,extracellular vesicle|GO:0065010,extracellular membrane-bounded organelle…	GO:0005102,receptor binding|GO:0005125,cytokine activity|GO:0005488,binding|GO:0005515,protein binding		http://www.uniprot.org/uniprot/Q9NX76
P07996	0.58395	-0.776083	P07996	THBS1	GO:0006909,phagocytosis|GO:0051049,regulation of transport|GO:0001667,ameboidal-type cell migration|GO:0007596,blood coagulation|GO:0001501,skeletal system development|GO:0032026,response to magnesium ion|GO:0042035,regulation of cytokine biosynthetic process|GO:0044281,small molecule metabolic process|GO:0051641,cellular localization|GO:0007599,hemostasis|GO:0048266,behavioral response to pain|G…	GO:0009897,external side of plasma membrane|GO:0005783,endoplasmic reticulum|GO:0098552,side of membrane|GO:0005788,endoplasmic reticulum lumen|GO:0031012,extracellular matrix|GO:0043229,intracellular organelle|GO:0071944,cell periphery|GO:0060205,cytoplasmic membrane-bounded vesicle lumen|GO:0043227,membrane-bounded organelle|GO:0043226,organelle|GO:0005737,cytoplasm|GO:0031983,vesicle lumen|GO:…	GO:0050840,extracellular matrix binding|GO:0031406,carboxylic acid binding|GO:0019955,cytokine binding|GO:0044877,macromolecular complex binding|GO:0005488,binding|GO:0030169,low-density lipoprotein particle binding|GO:0016597,amino acid binding|GO:0043168,anion binding|GO:0001948,glycoprotein binding|GO:1901681,sulfur compound binding|GO:0043169,cation binding|GO:0005543,phospholipid binding|GO:…	hsa04350,TGF-beta signaling pathway|hsa05219,Bladder cancer|hsa05144,Malaria|hsa05205,Proteoglycans in cancer|hsa05206,MicroRNAs in cancer|hsa04115,p53 signaling pathway|hsa04015,Rap1 signaling pathway|hsa04145,Phagosome|hsa04510,Focal adhesion|hsa04512,ECM-receptor interaction|hsa04151,PI3K-Akt signaling pathway	http://www.uniprot.org/uniprot/P07996
Q14118	0.59275	-0.754504	Q14118	DAG1	GO:0007016,cytoskeletal anchoring at plasma membrane|GO:0051169,nuclear transport|GO:0008104,protein localization|GO:0019220,regulation of phosphate metabolic process|GO:0080090,regulation of primary metabolic process|GO:0019222,regulation of metabolic process|GO:0048585,negative regulation of response to stimulus|GO:0019058,viral life cycle|GO:0048583,regulation of response to stimulus|GO:002201…	GO:0031974,membrane-enclosed lumen|GO:0031975,envelope|GO:0030312,external encapsulating structure|GO:0070938,contractile ring|GO:0030054,cell junction|GO:0030055,cell-substrate junction|GO:0097060,synaptic membrane|GO:0031982,vesicle|GO:0031981,nuclear lumen|GO:0016021,integral component of membrane|GO:0016020,membrane|GO:0031988,membrane-bounded vesicle|GO:0098589,membrane region|GO:0042995,cel…	GO:0005488,binding|GO:0017166,vinculin binding|GO:0050840,extracellular matrix binding|GO:0042169,SH2 domain binding|GO:0060089,molecular transducer activity|GO:0044877,macromolecular complex binding|GO:0002162,dystroglycan binding|GO:0005198,structural molecule activity|GO:0001948,glycoprotein binding|GO:0043169,cation binding|GO:0043167,ion binding|GO:0003779,actin binding|GO:0005509,calcium io…	hsa05410,Hypertrophic cardiomyopathy (HCM)|hsa05414,Dilated cardiomyopathy|hsa05412,Arrhythmogenic right ventricular cardiomyopathy (ARVC)|hsa04512,ECM-receptor interaction|hsa05416,Viral myocarditis	http://www.uniprot.org/uniprot/Q14118
P12318	0.60055	-0.735644	P12318	FCGR2A	GO:0006909,phagocytosis|GO:0006950,response to stress|GO:0048584,positive regulation of response to stimulus|GO:0048583,regulation of response to stimulus|GO:0023052,signaling|GO:0007165,signal transduction|GO:0007166,cell surface receptor signaling pathway|GO:0050789,regulation of biological process|GO:0044699,single-organism process|GO:0051716,cellular response to stimulus|GO:0002764,immune res…	GO:0043230,extracellular organelle|GO:0031982,vesicle|GO:0044421,extracellular region part|GO:0043227,membrane-bounded organelle|GO:0016021,integral component of membrane|GO:0016020,membrane|GO:0044464,cell part|GO:0005623,cell|GO:0031988,membrane-bounded vesicle|GO:0071944,cell periphery|GO:0005576,extracellular region|GO:0005886,plasma membrane|GO:0044425,membrane part|GO:1903561,extracellular …	GO:0019864,IgG binding|GO:0019865,immunoglobulin binding|GO:0044877,macromolecular complex binding|GO:0005488,binding|GO:0005515,protein binding|GO:0032403,protein complex binding	hsa04611,Platelet activation|hsa05322,Systemic lupus erythematosus|hsa05152,Tuberculosis|hsa05140,Leishmaniasis|hsa04145,Phagosome|hsa05150,Staphylococcus aureus infection|hsa04666,Fc gamma R-mediated phagocytosis|hsa04380,Osteoclast differentiation	http://www.uniprot.org/uniprot/P12318
Q9NXH8	0.6016	-0.733124	Q9NXH8	TOR4A		GO:0044425,membrane part|GO:0016021,integral component of membrane|GO:0016020,membrane|GO:0031224,intrinsic component of membrane	GO:0043168,anion binding|GO:0005488,binding|GO:0030554,adenyl nucleotide binding|GO:0035639,purine ribonucleoside triphosphate binding|GO:0097367,carbohydrate derivative binding|GO:1901363,heterocyclic compound binding|GO:1901265,nucleoside phosphate binding|GO:0000166,nucleotide binding|GO:0036094,small molecule binding|GO:0032553,ribonucleotide binding|GO:0032559,adenyl ribonucleotide binding|G…		http://www.uniprot.org/uniprot/Q9NXH8
Q9Y6C2	0.60255	-0.730847	Q9Y6C2	EMILIN1	GO:0009987,cellular process|GO:0016043,cellular component organization|GO:0030198,extracellular matrix organization|GO:0044763,single-organism cellular process|GO:0044699,single-organism process|GO:0043062,extracellular structure organization|GO:0007155,cell adhesion|GO:0022610,biological adhesion|GO:0071840,cellular component organization or biogenesis	GO:0043234,protein complex|GO:0043230,extracellular organelle|GO:0070062,extracellular exosome|GO:0044421,extracellular region part|GO:0043227,membrane-bounded organelle|GO:0031012,extracellular matrix|GO:0043226,organelle|GO:0032991,macromolecular complex|GO:0005576,extracellular region|GO:0005581,collagen trimer|GO:0031988,membrane-bounded vesicle|GO:1903561,extracellular vesicle|GO:0065010,ext…	GO:0005488,binding|GO:0005515,protein binding		http://www.uniprot.org/uniprot/Q9Y6C2
Q92614	0.61075	-0.711346	Q92614	MYO18A	GO:0008104,protein localization|GO:0051046,regulation of secretion|GO:0051047,positive regulation of secretion|GO:0051049,regulation of transport|GO:0006900,membrane budding|GO:0061024,membrane organization|GO:0007163,establishment or maintenance of cell polarity|GO:1901360,organic cyclic compound metabolic process|GO:0090164,asymmetric Golgi ribbon formation|GO:0010256,endomembrane system organi…	GO:0015629,actin cytoskeleton|GO:0043229,intracellular organelle|GO:0043228,non-membrane-bounded organelle|GO:0044430,cytoskeletal part|GO:0005622,intracellular|GO:0043227,membrane-bounded organelle|GO:0043226,organelle|GO:0042641,actomyosin|GO:0005856,cytoskeleton|GO:0031984,organelle subcompartment|GO:0031090,organelle membrane|GO:0016020,membrane|GO:0005737,cytoplasm|GO:0044431,Golgi apparatus…	GO:0016887,ATPase activity|GO:0035639,purine ribonucleoside triphosphate binding|GO:0044877,macromolecular complex binding|GO:0005488,binding|GO:0003676,nucleic acid binding|GO:0003677,DNA binding|GO:0043167,ion binding|GO:1901363,heterocyclic compound binding|GO:0001883,purine nucleoside binding|GO:0001882,nucleoside binding|GO:0043168,anion binding|GO:0000166,nucleotide binding|GO:0003779,actin…		http://www.uniprot.org/uniprot/Q92614
O43633	0.61085	-0.71111	O43633	CHMP2A	GO:0008104,protein localization|GO:0051046,regulation of secretion|GO:0051047,positive regulation of secretion|GO:0051049,regulation of transport|GO:0006900,membrane budding|GO:0061024,membrane organization|GO:0051656,establishment of organelle localization|GO:0071840,cellular component organization or biogenesis|GO:0007017,microtubule-based process|GO:0045786,negative regulation of cell cycle|GO…	GO:0016020,membrane|GO:0043229,intracellular organelle|GO:0030117,membrane coat|GO:0043227,membrane-bounded organelle|GO:0043226,organelle|GO:0010008,endosome membrane|GO:0005737,cytoplasm|GO:0031982,vesicle|GO:0098805,whole membrane|GO:0005770,late endosome|GO:0070062,extracellular exosome|GO:0031988,membrane-bounded vesicle|GO:0031902,late endosome membrane|GO:0048475,coated membrane|GO:0098588…	GO:0043168,anion binding|GO:0043169,cation binding|GO:0043178,alcohol binding|GO:0005543,phospholipid binding|GO:0008289,lipid binding|GO:0050997,quaternary ammonium group binding|GO:0043167,ion binding|GO:0070405,ammonium ion binding|GO:0031210,phosphatidylcholine binding|GO:0036094,small molecule binding|GO:0019904,protein domain specific binding|GO:0005515,protein binding|GO:0005488,binding	hsa04144,Endocytosis	http://www.uniprot.org/uniprot/O43633
Q86UE4	0.6138	-0.704159	Q86UE4	MTDH	GO:0080090,regulation of primary metabolic process|GO:0019222,regulation of metabolic process|GO:0048584,positive regulation of response to stimulus|GO:0048583,regulation of response to stimulus|GO:2000113,negative regulation of cellular macromolecule biosynthetic process|GO:0072359,circulatory system development|GO:0072358,cardiovascular system development|GO:0007165,signal transduction|GO:00071…	GO:0098590,plasma membrane region|GO:0016020,membrane|GO:0005783,endoplasmic reticulum|GO:0031974,membrane-enclosed lumen|GO:0005789,endoplasmic reticulum membrane|GO:0042175,nuclear outer membrane-endoplasmic reticulum membrane network|GO:0043229,intracellular organelle|GO:0043228,non-membrane-bounded organelle|GO:0043227,membrane-bounded organelle|GO:0043226,organelle|GO:0030054,cell junction|G…	GO:0001085,RNA polymerase II transcription factor binding|GO:0003713,transcription coactivator activity|GO:0005515,protein binding|GO:0097159,organic cyclic compound binding|GO:0044822,poly(A) RNA binding|GO:0008134,transcription factor binding|GO:0003712,transcription cofactor activity|GO:0051059,NF-kappaB binding|GO:0000989,transcription factor activity, transcription factor binding|GO:0003725,…		http://www.uniprot.org/uniprot/Q86UE4
Q9UNF0	0.62065	-0.688148	Q9UNF0	PACSIN2	GO:0022607,cellular component assembly|GO:0051234,establishment of localization|GO:0030030,cell projection organization|GO:0051049,regulation of transport|GO:0072584,caveolin-mediated endocytosis|GO:0044091,membrane biogenesis|GO:0051129,negative regulation of cellular component organization|GO:0051128,regulation of cellular component organization|GO:0061024,membrane organization|GO:0007009,plasm…	GO:0005911,cell-cell junction|GO:0044463,cell projection part|GO:0055038,recycling endosome membrane|GO:0098590,plasma membrane region|GO:0044421,extracellular region part|GO:0055037,recycling endosome|GO:0031974,membrane-enclosed lumen|GO:0019898,extrinsic component of membrane|GO:0005901,caveola|GO:0043229,intracellular organelle|GO:0043228,non-membrane-bounded organelle|GO:0005924,cell-substra…	GO:0043168,anion binding|GO:0008092,cytoskeletal protein binding|GO:0005215,transporter activity|GO:0070300,phosphatidic acid binding|GO:0005543,phospholipid binding|GO:0008289,lipid binding|GO:0043167,ion binding|GO:0005488,binding|GO:0005515,protein binding|GO:0042802,identical protein binding		http://www.uniprot.org/uniprot/Q9UNF0
Q5T4S7	0.62065	-0.688148	Q5T4S7	UBR4	GO:0044248,cellular catabolic process|GO:0043632,modification-dependent macromolecule catabolic process|GO:0044267,cellular protein metabolic process|GO:1901575,organic substance catabolic process|GO:0044265,cellular macromolecule catabolic process|GO:0044260,cellular macromolecule metabolic process|GO:0071704,organic substance metabolic process|GO:0070647,protein modification by small protein co…	GO:0031974,membrane-enclosed lumen|GO:0043229,intracellular organelle|GO:0043228,non-membrane-bounded organelle|GO:0043227,membrane-bounded organelle|GO:0043226,organelle|GO:0031224,intrinsic component of membrane|GO:0005856,cytoskeleton|GO:0031981,nuclear lumen|GO:0005813,centrosome|GO:0016021,integral component of membrane|GO:0016020,membrane|GO:0005815,microtubule organizing center|GO:0005654,…	GO:0019787,ubiquitin-like protein transferase activity|GO:0043169,cation binding|GO:0046914,transition metal ion binding|GO:0004842,ubiquitin-protein transferase activity|GO:0043167,ion binding|GO:0003824,catalytic activity|GO:0016740,transferase activity|GO:0008270,zinc ion binding|GO:0005515,protein binding|GO:0005488,binding|GO:0046872,metal ion binding|GO:0016874,ligase activity|GO:0005516,ca…	hsa05203,Viral carcinogenesis	http://www.uniprot.org/uniprot/Q5T4S7
Q8N699	0.62795	-0.671278	Q8N699	MYCT1		GO:0043231,intracellular membrane-bounded organelle|GO:0005634,nucleus|GO:0044464,cell part|GO:0005623,cell|GO:0005622,intracellular|GO:0043229,intracellular organelle|GO:0044424,intracellular part|GO:0043227,membrane-bounded organelle|GO:0043226,organelle			http://www.uniprot.org/uniprot/Q8N699
Q9BUL8	0.62835	-0.67036	Q9BUL8	PDCD10	GO:0044238,primary metabolic process|GO:0019220,regulation of phosphate metabolic process|GO:0080090,regulation of primary metabolic process|GO:0019222,regulation of metabolic process|GO:0001667,ameboidal-type cell migration|GO:0048584,positive regulation of response to stimulus|GO:0048583,regulation of response to stimulus|GO:0050680,negative regulation of epithelial cell proliferation|GO:007235…	GO:0043229,intracellular organelle|GO:0071944,cell periphery|GO:0005622,intracellular|GO:0043227,membrane-bounded organelle|GO:0043226,organelle|GO:0005737,cytoplasm|GO:0031982,vesicle|GO:0016020,membrane|GO:0031988,membrane-bounded vesicle|GO:0044431,Golgi apparatus part|GO:0005794,Golgi apparatus|GO:0098588,bounding membrane of organelle|GO:0012505,endomembrane system|GO:0005886,plasma membrane…	GO:0047485,protein N-terminus binding|GO:0019899,enzyme binding|GO:0019901,protein kinase binding|GO:0019900,kinase binding|GO:0005488,binding|GO:0005515,protein binding|GO:0046983,protein dimerization activity|GO:0042802,identical protein binding|GO:0042803,protein homodimerization activity		http://www.uniprot.org/uniprot/Q9BUL8
P61163	0.63315	-0.659381	P61163	ACTR1A	GO:0044839,cell cycle G2/M phase transition|GO:0000086,G2/M transition of mitotic cell cycle|GO:0002495,antigen processing and presentation of peptide antigen via MHC class II|GO:0044770,cell cycle phase transition|GO:0044772,mitotic cell cycle phase transition|GO:0022402,cell cycle process|GO:0048002,antigen processing and presentation of peptide antigen|GO:0071840,cellular component organizatio…	GO:0015629,actin cytoskeleton|GO:0043229,intracellular organelle|GO:0043228,non-membrane-bounded organelle|GO:0005815,microtubule organizing center|GO:0043227,membrane-bounded organelle|GO:0043226,organelle|GO:0005856,cytoskeleton|GO:0031982,vesicle|GO:0043209,myelin sheath|GO:0005813,centrosome|GO:0031988,membrane-bounded vesicle|GO:0044430,cytoskeletal part|GO:0005875,microtubule associated com…	GO:0043168,anion binding|GO:0005488,binding|GO:0030554,adenyl nucleotide binding|GO:0035639,purine ribonucleoside triphosphate binding|GO:0097367,carbohydrate derivative binding|GO:1901363,heterocyclic compound binding|GO:1901265,nucleoside phosphate binding|GO:0000166,nucleotide binding|GO:0036094,small molecule binding|GO:0032553,ribonucleotide binding|GO:0032559,adenyl ribonucleotide binding|G…		http://www.uniprot.org/uniprot/P61163
P56377	0.6395	-0.644984	P56377	AP1S2	GO:0008104,protein localization|GO:0050688,regulation of defense response to virus|GO:0032101,regulation of response to external stimulus|GO:0006950,response to stress|GO:0048583,regulation of response to stimulus|GO:0051607,defense response to virus|GO:0002495,antigen processing and presentation of peptide antigen via MHC class II|GO:0061024,membrane organization|GO:0044403,symbiosis, encompassi…	GO:0098796,membrane protein complex|GO:0000323,lytic vacuole|GO:0030139,endocytic vesicle|GO:0031984,organelle subcompartment|GO:0043229,intracellular organelle|GO:0030117,membrane coat|GO:0005905,coated pit|GO:0005773,vacuole|GO:0030119,AP-type membrane coat adaptor complex|GO:0005774,vacuolar membrane|GO:0030135,coated vesicle|GO:0043226,organelle|GO:0030136,clathrin-coated vesicle|GO:0030665,c…	GO:0008565,protein transporter activity|GO:0022892,substrate-specific transporter activity|GO:0005215,transporter activity|GO:0005488,binding|GO:0005515,protein binding	hsa04142,Lysosome	http://www.uniprot.org/uniprot/P56377
P16219	0.6403	-0.64318	P16219	ACADS	GO:0034440,lipid oxidation|GO:0006631,fatty acid metabolic process|GO:0022607,cellular component assembly|GO:0042594,response to starvation|GO:0006635,fatty acid beta-oxidation|GO:0051289,protein homotetramerization|GO:0043933,macromolecular complex subunit organization|GO:0009991,response to extracellular stimulus|GO:0019752,carboxylic acid metabolic process|GO:0044248,cellular catabolic process…	GO:0005737,cytoplasm|GO:0043231,intracellular membrane-bounded organelle|GO:0043233,organelle lumen|GO:0005634,nucleus|GO:0044464,cell part|GO:0044444,cytoplasmic part|GO:0031974,membrane-enclosed lumen|GO:0005622,intracellular|GO:0044446,intracellular organelle part|GO:0070013,intracellular organelle lumen|GO:0043229,intracellular organelle|GO:0005739,mitochondrion|GO:0044429,mitochondrial part|…	GO:1901681,sulfur compound binding|GO:0043168,anion binding|GO:0050660,flavin adenine dinucleotide binding|GO:0050662,coenzyme binding|GO:0097159,organic cyclic compound binding|GO:0052890,oxidoreductase activity, acting on the CH-CH group of donors, with a flavin as acceptor|GO:1901363,heterocyclic compound binding|GO:0000062,fatty-acyl-CoA binding|GO:0000166,nucleotide binding|GO:0036094,small …	hsa01100,Metabolic pathways|hsa00071,Fatty acid degradation|hsa01200,Carbon metabolism|hsa00280,Valine, leucine and isoleucine degradation|hsa01212,Fatty acid metabolism|hsa00650,Butanoate metabolism	http://www.uniprot.org/uniprot/P16219
O14773	0.6403	-0.64318	O14773	TPP1	GO:0042221,response to chemical|GO:0044707,single-multicellular organism process|GO:0060249,anatomical structure homeostasis|GO:0044237,cellular metabolic process|GO:0007040,lysosome organization|GO:0030154,cell differentiation|GO:0048771,tissue remodeling|GO:1901564,organonitrogen compound metabolic process|GO:0042592,homeostatic process|GO:0034641,cellular nitrogen compound metabolic process|GO…	GO:0000323,lytic vacuole|GO:0048770,pigment granule|GO:0031974,membrane-enclosed lumen|GO:0043229,intracellular organelle|GO:0005775,vacuolar lumen|GO:0005773,vacuole|GO:0043227,membrane-bounded organelle|GO:0043226,organelle|GO:0005737,cytoplasm|GO:0005764,lysosome|GO:0043202,lysosomal lumen|GO:0070062,extracellular exosome|GO:0016023,cytoplasmic membrane-bounded vesicle|GO:0031410,cytoplasmic v…	GO:0004252,serine-type endopeptidase activity|GO:0004175,endopeptidase activity|GO:0042277,peptide binding|GO:0017171,serine hydrolase activity|GO:0008240,tripeptidyl-peptidase activity|GO:0033218,amide binding|GO:0016787,hydrolase activity|GO:0043169,cation binding|GO:0003824,catalytic activity|GO:0043167,ion binding|GO:0008238,exopeptidase activity|GO:0070011,peptidase activity, acting on L-ami…	hsa04142,Lysosome	http://www.uniprot.org/uniprot/O14773
Q5M775	0.64465	-0.633412	Q5M775	SPECC1		GO:0043231,intracellular membrane-bounded organelle|GO:0005634,nucleus|GO:0044464,cell part|GO:0005623,cell|GO:0005622,intracellular|GO:0043229,intracellular organelle|GO:0044424,intracellular part|GO:0043227,membrane-bounded organelle|GO:0043226,organelle			http://www.uniprot.org/uniprot/Q5M775
P61020	0.64805	-0.625823	P61020	RAB5B	GO:0008104,protein localization|GO:0051234,establishment of localization|GO:0050794,regulation of cellular process|GO:0051049,regulation of transport|GO:0051128,regulation of cellular component organization|GO:0048227,plasma membrane to endosome transport|GO:0023052,signaling|GO:0007165,signal transduction|GO:0051641,cellular localization|GO:0035556,intracellular signal transduction|GO:0050789,re…	GO:0044421,extracellular region part|GO:0048770,pigment granule|GO:0030139,endocytic vesicle|GO:0043229,intracellular organelle|GO:0071944,cell periphery|GO:0043227,membrane-bounded organelle|GO:0043226,organelle|GO:0010008,endosome membrane|GO:0005737,cytoplasm|GO:0070062,extracellular exosome|GO:0016023,cytoplasmic membrane-bounded vesicle|GO:0031410,cytoplasmic vesicle|GO:0098805,whole membran…	GO:0035639,purine ribonucleoside triphosphate binding|GO:0005488,binding|GO:0043167,ion binding|GO:1901363,heterocyclic compound binding|GO:1901265,nucleoside phosphate binding|GO:0001882,nucleoside binding|GO:0043168,anion binding|GO:0030742,GTP-dependent protein binding|GO:0016462,pyrophosphatase activity|GO:0000166,nucleotide binding|GO:0032561,guanyl ribonucleotide binding|GO:0001883,purine n…	hsa04962,Vasopressin-regulated water reabsorption|hsa04014,Ras signaling pathway|hsa04145,Phagosome|hsa04144,Endocytosis|hsa05152,Tuberculosis|hsa05146,Amoebiasis	http://www.uniprot.org/uniprot/P61020
P20338	0.65225	-0.616503	P20338	RAB4A	GO:0008104,protein localization|GO:0051234,establishment of localization|GO:0009893,positive regulation of metabolic process|GO:0019222,regulation of metabolic process|GO:0051049,regulation of transport|GO:0006810,transport|GO:0051128,regulation of cellular component organization|GO:0061024,membrane organization|GO:0023052,signaling|GO:0007165,signal transduction|GO:0032879,regulation of localiza…	GO:0055037,recycling endosome|GO:0043229,intracellular organelle|GO:0071944,cell periphery|GO:0032593,insulin-responsive compartment|GO:0043227,membrane-bounded organelle|GO:0043226,organelle|GO:0005737,cytoplasm|GO:0070062,extracellular exosome|GO:0016023,cytoplasmic membrane-bounded vesicle|GO:0031410,cytoplasmic vesicle|GO:0016020,membrane|GO:0031988,membrane-bounded vesicle|GO:0048471,perinuc…	GO:0035639,purine ribonucleoside triphosphate binding|GO:0019899,enzyme binding|GO:0008047,enzyme activator activity|GO:0060590,ATPase regulator activity|GO:0098772,molecular function regulator|GO:1901363,heterocyclic compound binding|GO:0001883,purine nucleoside binding|GO:0001882,nucleoside binding|GO:0008565,protein transporter activity|GO:0019001,guanyl nucleotide binding|GO:0000149,SNARE bin…	hsa04144,Endocytosis	http://www.uniprot.org/uniprot/P20338
P48507	0.65785	-0.604169	P48507	GCLM	GO:2001234,negative regulation of apoptotic signaling pathway|GO:2001236,regulation of extrinsic apoptotic signaling pathway|GO:2001237,negative regulation of extrinsic apoptotic signaling pathway|GO:0019222,regulation of metabolic process|GO:2001233,regulation of apoptotic signaling pathway|GO:0048585,negative regulation of response to stimulus|GO:0048583,regulation of response to stimulus|GO:00…	GO:0043234,protein complex|GO:0005737,cytoplasm|GO:0032991,macromolecular complex|GO:1902494,catalytic complex|GO:0017109,glutamate-cysteine ligase complex|GO:0044464,cell part|GO:0005623,cell|GO:0005622,intracellular|GO:0044444,cytoplasmic part|GO:0044424,intracellular part|GO:0005829,cytosol	GO:0046982,protein heterodimerization activity|GO:0003824,catalytic activity|GO:0035226,glutamate-cysteine ligase catalytic subunit binding|GO:0004357,glutamate-cysteine ligase activity|GO:0030234,enzyme regulator activity|GO:0019899,enzyme binding|GO:0016881,acid-amino acid ligase activity|GO:0016879,ligase activity, forming carbon-nitrogen bonds|GO:0005488,binding|GO:0005515,protein binding|GO:…	hsa01100,Metabolic pathways|hsa00480,Glutathione metabolism	http://www.uniprot.org/uniprot/P48507
P55060	0.66005	-0.599353	P55060	CSE1L	GO:0051169,nuclear transport|GO:0051168,nuclear export|GO:0006611,protein export from nucleus|GO:0008104,protein localization|GO:0051641,cellular localization|GO:0008219,cell death|GO:0044699,single-organism process|GO:0070727,cellular macromolecule localization|GO:0006886,intracellular protein transport|GO:0006810,transport|GO:0071702,organic substance transport|GO:0033036,macromolecule localiza…	GO:0031974,membrane-enclosed lumen|GO:0043229,intracellular organelle|GO:0043227,membrane-bounded organelle|GO:0043226,organelle|GO:0005737,cytoplasm|GO:0070062,extracellular exosome|GO:0031981,nuclear lumen|GO:0005634,nucleus|GO:0016020,membrane|GO:0031988,membrane-bounded vesicle|GO:0005654,nucleoplasm|GO:1903561,extracellular vesicle|GO:0031982,vesicle|GO:0043230,extracellular organelle|GO:004…	GO:0008536,Ran GTPase binding|GO:0019899,enzyme binding|GO:0017016,Ras GTPase binding|GO:0031267,small GTPase binding|GO:0051020,GTPase binding|GO:0005488,binding|GO:0005515,protein binding		http://www.uniprot.org/uniprot/P55060
O14618	0.66445	-0.589767	O14618	CCS	GO:0051716,cellular response to stimulus|GO:0009893,positive regulation of metabolic process|GO:0019222,regulation of metabolic process|GO:0000305,response to oxygen radical|GO:0006810,transport|GO:0035434,copper ion transmembrane transport|GO:0000303,response to superoxide|GO:0000302,response to reactive oxygen species|GO:0006801,superoxide metabolic process|GO:0070887,cellular response to chemi…	GO:0005737,cytoplasm|GO:0043231,intracellular membrane-bounded organelle|GO:0005829,cytosol|GO:0044464,cell part|GO:0044444,cytoplasmic part|GO:0005623,cell|GO:0043226,organelle|GO:0043229,intracellular organelle|GO:0044424,intracellular part|GO:0005622,intracellular|GO:0043227,membrane-bounded organelle|GO:0005634,nucleus	GO:0005488,binding|GO:0046872,metal ion binding|GO:0008270,zinc ion binding|GO:0016491,oxidoreductase activity|GO:0016721,oxidoreductase activity, acting on superoxide radicals as acceptor|GO:0046914,transition metal ion binding|GO:0046915,transition metal ion transmembrane transporter activity|GO:0043167,ion binding|GO:0016667,oxidoreductase activity, acting on a sulfur group of donors|GO:000537…	hsa05014,Amyotrophic lateral sclerosis (ALS)	http://www.uniprot.org/uniprot/O14618
P11940	0.66495	-0.588682	P11940	PABPC1	GO:0080090,regulation of primary metabolic process|GO:0019222,regulation of metabolic process|GO:0050685,positive regulation of mRNA processing|GO:0050684,regulation of mRNA processing|GO:1901576,organic substance biosynthetic process|GO:1901360,organic cyclic compound metabolic process|GO:1901361,organic cyclic compound catabolic process|GO:0010605,negative regulation of macromolecule metabolic …	GO:0035770,ribonucleoprotein granule|GO:0043229,intracellular organelle|GO:0043228,non-membrane-bounded organelle|GO:0036464,cytoplasmic ribonucleoprotein granule|GO:0005924,cell-substrate adherens junction|GO:0005925,focal adhesion|GO:0043227,membrane-bounded organelle|GO:0043226,organelle|GO:0030054,cell junction|GO:0030055,cell-substrate junction|GO:0005737,cytoplasm|GO:0031982,vesicle|GO:0005…	GO:0005488,binding|GO:0036094,small molecule binding|GO:0008022,protein C-terminus binding|GO:0090079,translation regulator activity, nucleic acid binding|GO:0005515,protein binding|GO:0008143,poly(A) binding|GO:0097159,organic cyclic compound binding|GO:0044822,poly(A) RNA binding|GO:1901363,heterocyclic compound binding|GO:0000166,nucleotide binding|GO:0008266,poly(U) RNA binding|GO:0003727,sin…	hsa03015,mRNA surveillance pathway|hsa03013,RNA transport|hsa03018,RNA degradation	http://www.uniprot.org/uniprot/P11940
P56202	0.66625	-0.585864	P56202	CTSW	GO:0044248,cellular catabolic process|GO:0044267,cellular protein metabolic process|GO:1901575,organic substance catabolic process|GO:0044265,cellular macromolecule catabolic process|GO:0044260,cellular macromolecule metabolic process|GO:0071704,organic substance metabolic process|GO:0006508,proteolysis|GO:0044238,primary metabolic process|GO:0009987,cellular process|GO:0030163,protein catabolic …	GO:0005737,cytoplasm|GO:0000323,lytic vacuole|GO:0043231,intracellular membrane-bounded organelle|GO:0005773,vacuole|GO:0016020,membrane|GO:0044464,cell part|GO:0044444,cytoplasmic part|GO:0005623,cell|GO:0005622,intracellular|GO:0005764,lysosome|GO:0044421,extracellular region part|GO:0043229,intracellular organelle|GO:0005576,extracellular region|GO:0044424,intracellular part|GO:0043227,membran…	GO:0016787,hydrolase activity|GO:0004175,endopeptidase activity|GO:0070011,peptidase activity, acting on L-amino acid peptides|GO:0003824,catalytic activity|GO:0004197,cysteine-type endopeptidase activity|GO:0008233,peptidase activity|GO:0008234,cysteine-type peptidase activity	hsa04142,Lysosome	http://www.uniprot.org/uniprot/P56202
P24844	0.6691	-0.579706	P24844	MYL9	GO:0050817,coagulation|GO:0006936,muscle contraction|GO:0044707,single-multicellular organism process|GO:0016337,single organismal cell-cell adhesion|GO:0007409,axonogenesis|GO:0030030,cell projection organization|GO:0031175,neuron projection development|GO:0048468,cell development|GO:0006928,movement of cell or subcellular component|GO:0007596,blood coagulation|GO:0003012,muscle system process|G…	GO:0032432,actin filament bundle|GO:0015629,actin cytoskeleton|GO:0030016,myofibril|GO:0030017,sarcomere|GO:0043229,intracellular organelle|GO:0043228,non-membrane-bounded organelle|GO:0044430,cytoskeletal part|GO:0043226,organelle|GO:0030018,Z disc|GO:0042641,actomyosin|GO:0005856,cytoskeleton|GO:0001725,stress fiber|GO:0031674,I band|GO:0005859,muscle myosin complex|GO:0016459,myosin complex|GO…	GO:0032036,myosin heavy chain binding|GO:0043169,cation binding|GO:0005198,structural molecule activity|GO:0008092,cytoskeletal protein binding|GO:0017022,myosin binding|GO:0043167,ion binding|GO:0008307,structural constituent of muscle|GO:0005509,calcium ion binding|GO:0005515,protein binding|GO:0046872,metal ion binding|GO:0005488,binding	hsa04022,cGMP-PKG signaling pathway|hsa04024,cAMP signaling pathway|hsa04530,Tight junction|hsa04670,Leukocyte transendothelial migration|hsa04510,Focal adhesion|hsa04810,Regulation of actin cytoskeleton|hsa04921,Oxytocin signaling pathway|hsa04270,Vascular smooth muscle contraction	http://www.uniprot.org/uniprot/P24844
P61604	1.50025	0.585203	P61604	HSPE1	GO:0032502,developmental process|GO:0006457,protein folding|GO:0080090,regulation of primary metabolic process|GO:0019222,regulation of metabolic process|GO:0031325,positive regulation of cellular metabolic process|GO:0030154,cell differentiation|GO:0031323,regulation of cellular metabolic process|GO:2001056,positive regulation of cysteine-type endopeptidase activity|GO:0031638,zymogen activation…	GO:0031974,membrane-enclosed lumen|GO:0043229,intracellular organelle|GO:0043227,membrane-bounded organelle|GO:0043226,organelle|GO:0005737,cytoplasm|GO:0070062,extracellular exosome|GO:0016020,membrane|GO:0005739,mitochondrion|GO:0031988,membrane-bounded vesicle|GO:0005759,mitochondrial matrix|GO:1903561,extracellular vesicle|GO:0031982,vesicle|GO:0043230,extracellular organelle|GO:0043231,intra…	GO:0035639,purine ribonucleoside triphosphate binding|GO:0005488,binding|GO:0003676,nucleic acid binding|GO:0000166,nucleotide binding|GO:1901363,heterocyclic compound binding|GO:1901265,nucleoside phosphate binding|GO:0001882,nucleoside binding|GO:0043168,anion binding|GO:0051087,chaperone binding|GO:0051082,unfolded protein binding|GO:0043167,ion binding|GO:0001883,purine nucleoside binding|GO:…		http://www.uniprot.org/uniprot/P61604
O75964	1.5013	0.586212	O75964	ATP5L	GO:0009167,purine ribonucleoside monophosphate metabolic process|GO:0009165,nucleotide biosynthetic process|GO:0009163,nucleoside biosynthetic process|GO:0009161,ribonucleoside monophosphate metabolic process|GO:1901362,organic cyclic compound biosynthetic process|GO:0042451,purine nucleoside biosynthetic process|GO:0009168,purine ribonucleoside monophosphate biosynthetic process|GO:0044710,singl…	GO:0044464,cell part|GO:0031975,envelope|GO:0043229,intracellular organelle|GO:0031988,membrane-bounded vesicle|GO:0043227,membrane-bounded organelle|GO:0043226,organelle|GO:0005737,cytoplasm|GO:0045263,proton-transporting ATP synthase complex, coupling factor F(o)|GO:0031982,vesicle|GO:0098796,membrane protein complex|GO:0016020,membrane|GO:0044444,cytoplasmic part|GO:0005739,mitochondrion|GO:00…	GO:0022891,substrate-specific transmembrane transporter activity|GO:0022890,inorganic cation transmembrane transporter activity|GO:0016818,hydrolase activity, acting on acid anhydrides, in phosphorus-containing anhydrides|GO:0022892,substrate-specific transporter activity|GO:0016787,hydrolase activity|GO:0005215,transporter activity|GO:0003824,catalytic activity|GO:0008324,cation transmembrane tr…	hsa01100,Metabolic pathways|hsa00190,Oxidative phosphorylation	http://www.uniprot.org/uniprot/O75964
O15143	1.5393	0.622274	O15143	ARPC1B	GO:0022607,cellular component assembly|GO:0033043,regulation of organelle organization|GO:0043933,macromolecular complex subunit organization|GO:0030036,actin cytoskeleton organization|GO:0051128,regulation of cellular component organization|GO:0008064,regulation of actin polymerization or depolymerization|GO:0034314,Arp2/3 complex-mediated actin nucleation|GO:0034622,cellular macromolecular comp…	GO:0015629,actin cytoskeleton|GO:0043229,intracellular organelle|GO:0043228,non-membrane-bounded organelle|GO:0005924,cell-substrate adherens junction|GO:0005925,focal adhesion|GO:0043227,membrane-bounded organelle|GO:0043226,organelle|GO:0030054,cell junction|GO:0030055,cell-substrate junction|GO:0005856,cytoskeleton|GO:0031982,vesicle|GO:0031988,membrane-bounded vesicle|GO:0044430,cytoskeletal …	GO:0005200,structural constituent of cytoskeleton|GO:0008092,cytoskeletal protein binding|GO:0051015,actin filament binding|GO:0005198,structural molecule activity|GO:0003779,actin binding|GO:0044877,macromolecular complex binding|GO:0005488,binding|GO:0005515,protein binding|GO:0032403,protein complex binding	hsa05132,Salmonella infection|hsa05131,Shigellosis|hsa05130,Pathogenic Escherichia coli infection|hsa05100,Bacterial invasion of epithelial cells|hsa04144,Endocytosis|hsa04666,Fc gamma R-mediated phagocytosis|hsa04810,Regulation of actin cytoskeleton	http://www.uniprot.org/uniprot/O15143
Q8NBM8	1.55115	0.633338	Q8NBM8	PCYOX1L	GO:0030327,prenylated protein catabolic process|GO:0030328,prenylcysteine catabolic process|GO:0030329,prenylcysteine metabolic process|GO:0019752,carboxylic acid metabolic process|GO:0009063,cellular amino acid catabolic process|GO:0043436,oxoacid metabolic process|GO:0006807,nitrogen compound metabolic process|GO:0044281,small molecule metabolic process|GO:0044282,small molecule catabolic proce…	GO:0005737,cytoplasm|GO:0043231,intracellular membrane-bounded organelle|GO:0005773,vacuole|GO:0098588,bounding membrane of organelle|GO:0016020,membrane|GO:0044464,cell part|GO:0044444,cytoplasmic part|GO:0005623,cell|GO:0005774,vacuolar membrane|GO:0044446,intracellular organelle part|GO:0043229,intracellular organelle|GO:0005576,extracellular region|GO:0044437,vacuolar part|GO:0044424,intracel…	GO:0003824,catalytic activity|GO:0016670,oxidoreductase activity, acting on a sulfur group of donors, oxygen as acceptor|GO:0016667,oxidoreductase activity, acting on a sulfur group of donors|GO:0001735,prenylcysteine oxidase activity|GO:0016491,oxidoreductase activity		http://www.uniprot.org/uniprot/Q8NBM8
P01857	1.5751	0.655443	P01857	IGHG1	GO:0044238,primary metabolic process|GO:0006909,phagocytosis|GO:0006950,response to stress|GO:0048584,positive regulation of response to stimulus|GO:0048583,regulation of response to stimulus|GO:0023052,signaling|GO:0007165,signal transduction|GO:0007166,cell surface receptor signaling pathway|GO:0002455,humoral immune response mediated by circulating immunoglobulin|GO:0050789,regulation of biolo…	GO:0043230,extracellular organelle|GO:0031982,vesicle|GO:0044421,extracellular region part|GO:0043227,membrane-bounded organelle|GO:0072562,blood microparticle|GO:0031988,membrane-bounded vesicle|GO:0005576,extracellular region|GO:0005615,extracellular space|GO:1903561,extracellular vesicle|GO:0065010,extracellular membrane-bounded organelle|GO:0043226,organelle|GO:0070062,extracellular exosome	GO:0005515,protein binding|GO:0003823,antigen binding|GO:0005488,binding		http://www.uniprot.org/uniprot/P01857
P25705	1.5865	0.665848	P25705	ATP5A1	GO:0050680,negative regulation of epithelial cell proliferation|GO:0009167,purine ribonucleoside monophosphate metabolic process|GO:0009165,nucleotide biosynthetic process|GO:0009163,nucleoside biosynthetic process|GO:0009161,ribonucleoside monophosphate metabolic process|GO:1901362,organic cyclic compound biosynthetic process|GO:0042451,purine nucleoside biosynthetic process|GO:0009168,purine ri…	GO:0098796,membrane protein complex|GO:0044464,cell part|GO:0031974,membrane-enclosed lumen|GO:0031975,envelope|GO:0043229,intracellular organelle|GO:0071944,cell periphery|GO:0031988,membrane-bounded vesicle|GO:0043227,membrane-bounded organelle|GO:0043226,organelle|GO:0008180,COP9 signalosome|GO:0045261,proton-transporting ATP synthase complex, catalytic core F(1)|GO:0033178,proton-transporting…	GO:0042287,MHC protein binding|GO:0003676,nucleic acid binding|GO:0035639,purine ribonucleoside triphosphate binding|GO:0036442,hydrogen-exporting ATPase activity|GO:0005488,binding|GO:0016887,ATPase activity|GO:0000166,nucleotide binding|GO:1901363,heterocyclic compound binding|GO:0032550,purine ribonucleoside binding|GO:0001882,nucleoside binding|GO:0043168,anion binding|GO:0042625,ATPase activ…	hsa05016,Huntington's disease|hsa01100,Metabolic pathways|hsa05010,Alzheimer's disease|hsa05012,Parkinson's disease|hsa00190,Oxidative phosphorylation	http://www.uniprot.org/uniprot/P25705
Q86UX7	1.58815	0.667347	Q86UX7	FERMT3	GO:0022607,cellular component assembly|GO:0016337,single organismal cell-cell adhesion|GO:0034446,substrate adhesion-dependent cell spreading|GO:0043933,macromolecular complex subunit organization|GO:0050896,response to stimulus|GO:0030155,regulation of cell adhesion|GO:0030154,cell differentiation|GO:0048468,cell development|GO:0007596,blood coagulation|GO:0022407,regulation of cell-cell adhesio…	GO:0015629,actin cytoskeleton|GO:0043229,intracellular organelle|GO:0043228,non-membrane-bounded organelle|GO:0005623,cell|GO:0043227,membrane-bounded organelle|GO:0043226,organelle|GO:0030054,cell junction|GO:0005856,cytoskeleton|GO:0002102,podosome|GO:0031982,vesicle|GO:0016020,membrane|GO:0031988,membrane-bounded vesicle|GO:0044430,cytoskeletal part|GO:0032991,macromolecular complex|GO:0042995…	GO:0005178,integrin binding|GO:0044877,macromolecular complex binding|GO:0005488,binding|GO:0005515,protein binding|GO:0032403,protein complex binding|GO:0005102,receptor binding|GO:0050839,cell adhesion molecule binding	hsa04611,Platelet activation	http://www.uniprot.org/uniprot/Q86UX7
Q14165	1.59815	0.676403	Q14165	MLEC	GO:0006457,protein folding|GO:0044249,cellular biosynthetic process|GO:0034645,cellular macromolecule biosynthetic process|GO:0009100,glycoprotein metabolic process|GO:0009101,glycoprotein biosynthetic process|GO:0044699,single-organism process|GO:0044267,cellular protein metabolic process|GO:0044710,single-organism metabolic process|GO:0044260,cellular macromolecule metabolic process|GO:0006487,…	GO:0005783,endoplasmic reticulum|GO:0005789,endoplasmic reticulum membrane|GO:0042175,nuclear outer membrane-endoplasmic reticulum membrane network|GO:0043229,intracellular organelle|GO:0043227,membrane-bounded organelle|GO:0043226,organelle|GO:0031224,intrinsic component of membrane|GO:0005737,cytoplasm|GO:0031090,organelle membrane|GO:0016021,integral component of membrane|GO:0016020,membrane|G…	GO:0005488,binding|GO:0030246,carbohydrate binding|GO:0019899,enzyme binding|GO:0005515,protein binding		http://www.uniprot.org/uniprot/Q14165
Q9NTJ5	1.59985	0.677937	Q9NTJ5	SACM1L	GO:0006650,glycerophospholipid metabolic process|GO:0016311,dephosphorylation|GO:0044249,cellular biosynthetic process|GO:0044281,small molecule metabolic process|GO:0044255,cellular lipid metabolic process|GO:0044699,single-organism process|GO:0045017,glycerolipid biosynthetic process|GO:0044710,single-organism metabolic process|GO:0044711,single-organism biosynthetic process|GO:0090407,organoph…	GO:0032281,AMPA glutamate receptor complex|GO:0005783,endoplasmic reticulum|GO:0005789,endoplasmic reticulum membrane|GO:0042175,nuclear outer membrane-endoplasmic reticulum membrane network|GO:0043229,intracellular organelle|GO:0030176,integral component of endoplasmic reticulum membrane|GO:0031301,integral component of organelle membrane|GO:0031300,intrinsic component of organelle membrane|GO:0…	GO:0052866,phosphatidylinositol phosphate phosphatase activity|GO:0016791,phosphatase activity|GO:0005515,protein binding|GO:0016788,hydrolase activity, acting on ester bonds|GO:0016787,hydrolase activity|GO:0052744,phosphatidylinositol monophosphate phosphatase activity|GO:0004438,phosphatidylinositol-3-phosphatase activity|GO:0034593,phosphatidylinositol bisphosphate phosphatase activity|GO:000…		http://www.uniprot.org/uniprot/Q9NTJ5
P00387	1.6078	0.685088	P00387	CYB5R3	GO:0019752,carboxylic acid metabolic process|GO:0044723,single-organism carbohydrate metabolic process|GO:0016125,sterol metabolic process|GO:0044281,small molecule metabolic process|GO:0044283,small molecule biosynthetic process|GO:1901362,organic cyclic compound biosynthetic process|GO:0044699,single-organism process|GO:0019852,L-ascorbic acid metabolic process|GO:0044710,single-organism metabo…	GO:0016020,membrane|GO:0005783,endoplasmic reticulum|GO:0044464,cell part|GO:0031090,organelle membrane|GO:0005789,endoplasmic reticulum membrane|GO:0042175,nuclear outer membrane-endoplasmic reticulum membrane network|GO:0043229,intracellular organelle|GO:0043228,non-membrane-bounded organelle|GO:0005833,hemoglobin complex|GO:0043227,membrane-bounded organelle|GO:0043226,organelle|GO:0005737,cyt…	GO:0051287,NAD binding|GO:0005488,binding|GO:0001883,purine nucleoside binding|GO:0043167,ion binding|GO:1901363,heterocyclic compound binding|GO:1901265,nucleoside phosphate binding|GO:0001882,nucleoside binding|GO:0043168,anion binding|GO:0043169,cation binding|GO:0050660,flavin adenine dinucleotide binding|GO:0000166,nucleotide binding|GO:0071949,FAD binding|GO:0032549,ribonucleoside binding|G…	hsa00520,Amino sugar and nucleotide sugar metabolism	http://www.uniprot.org/uniprot/P00387
P21399	1.6371	0.711142	P21399	ACO1	GO:0080090,regulation of primary metabolic process|GO:0019222,regulation of metabolic process|GO:0055072,iron ion homeostasis|GO:0044281,small molecule metabolic process|GO:0055076,transition metal ion homeostasis|GO:0098771,inorganic ion homeostasis|GO:0072350,tricarboxylic acid metabolic process|GO:0044710,single-organism metabolic process|GO:0010608,posttranscriptional regulation of gene expre…	GO:0005783,endoplasmic reticulum|GO:0043229,intracellular organelle|GO:0043227,membrane-bounded organelle|GO:0043226,organelle|GO:0005737,cytoplasm|GO:0031982,vesicle|GO:0005739,mitochondrion|GO:0031988,membrane-bounded vesicle|GO:0005794,Golgi apparatus|GO:0012505,endomembrane system|GO:1903561,extracellular vesicle|GO:0070062,extracellular exosome|GO:0043230,extracellular organelle|GO:0043231,i…	GO:0005488,binding|GO:0043169,cation binding|GO:0051540,metal cluster binding|GO:0051539,4 iron, 4 sulfur cluster binding|GO:0005515,protein binding|GO:0003824,catalytic activity|GO:0016835,carbon-oxygen lyase activity|GO:0016836,hydro-lyase activity|GO:0043167,ion binding|GO:0044822,poly(A) RNA binding|GO:1901363,heterocyclic compound binding|GO:0030350,iron-responsive element binding|GO:0003723…	hsa01100,Metabolic pathways|hsa00630,Glyoxylate and dicarboxylate metabolism|hsa01200,Carbon metabolism|hsa00020,Citrate cycle (TCA cycle)|hsa01130,Biosynthesis of antibiotics|hsa01230,Biosynthesis of amino acids|hsa01210,2-Oxocarboxylic acid metabolism	http://www.uniprot.org/uniprot/P21399
P21926	1.6427	0.716069	P21926	CD9	GO:0007599,hemostasis|GO:0007596,blood coagulation|GO:0048468,cell development|GO:0061025,membrane fusion|GO:0061024,membrane organization|GO:0060322,head development|GO:0071840,cellular component organization or biogenesis|GO:0000003,reproduction|GO:0030913,paranodal junction assembly|GO:0048869,cellular developmental process|GO:0009611,response to wounding|GO:0048513,organ development|GO:004851…	GO:0098590,plasma membrane region|GO:0005887,integral component of plasma membrane|GO:0009897,external side of plasma membrane|GO:0044421,extracellular region part|GO:0030139,endocytic vesicle|GO:0043229,intracellular organelle|GO:0071944,cell periphery|GO:0098552,side of membrane|GO:0005924,cell-substrate adherens junction|GO:0005925,focal adhesion|GO:0030135,coated vesicle|GO:0043226,organelle|…	GO:0005178,integrin binding|GO:0044877,macromolecular complex binding|GO:0005488,binding|GO:0005515,protein binding|GO:0032403,protein complex binding|GO:0005102,receptor binding|GO:0050839,cell adhesion molecule binding	hsa04640,Hematopoietic cell lineage	http://www.uniprot.org/uniprot/P21926
P07954	1.648	0.720716	P07954	FH	GO:0060249,anatomical structure homeostasis|GO:0019752,carboxylic acid metabolic process|GO:0042592,homeostatic process|GO:0006099,tricarboxylic acid cycle|GO:0009060,aerobic respiration|GO:0044281,small molecule metabolic process|GO:0006091,generation of precursor metabolites and energy|GO:0072350,tricarboxylic acid metabolic process|GO:0044699,single-organism process|GO:0044710,single-organism …	GO:0031974,membrane-enclosed lumen|GO:0043229,intracellular organelle|GO:0043227,membrane-bounded organelle|GO:0043226,organelle|GO:0005737,cytoplasm|GO:0070062,extracellular exosome|GO:0005739,mitochondrion|GO:0031988,membrane-bounded vesicle|GO:0005759,mitochondrial matrix|GO:0045239,tricarboxylic acid cycle enzyme complex|GO:0032991,macromolecular complex|GO:1903561,extracellular vesicle|GO:00…	GO:0016835,carbon-oxygen lyase activity|GO:0016836,hydro-lyase activity|GO:0003824,catalytic activity|GO:0005488,binding|GO:0005515,protein binding|GO:0004333,fumarate hydratase activity|GO:0016829,lyase activity	hsa00620,Pyruvate metabolism|hsa01100,Metabolic pathways|hsa05211,Renal cell carcinoma|hsa05200,Pathways in cancer|hsa01200,Carbon metabolism|hsa01130,Biosynthesis of antibiotics|hsa00020,Citrate cycle (TCA cycle)	http://www.uniprot.org/uniprot/P07954
P01024	1.65615	0.727833	P01024	C3	GO:0032026,response to magnesium ion|GO:0019220,regulation of phosphate metabolic process|GO:0080090,regulation of primary metabolic process|GO:0019222,regulation of metabolic process|GO:0048589,developmental growth|GO:0051049,regulation of transport|GO:0048584,positive regulation of response to stimulus|GO:0048583,regulation of response to stimulus|GO:0002437,inflammatory response to antigenic s…	GO:0043230,extracellular organelle|GO:0031982,vesicle|GO:0044421,extracellular region part|GO:0043227,membrane-bounded organelle|GO:0016020,membrane|GO:0044464,cell part|GO:0005623,cell|GO:0031988,membrane-bounded vesicle|GO:0071944,cell periphery|GO:0005615,extracellular space|GO:0072562,blood microparticle|GO:0005886,plasma membrane|GO:0005576,extracellular region|GO:1903561,extracellular vesic…	GO:0005102,receptor binding|GO:0004866,endopeptidase inhibitor activity|GO:0061135,endopeptidase regulator activity|GO:0061134,peptidase regulator activity|GO:0008289,lipid binding|GO:0031714,C5a anaphylatoxin chemotactic receptor binding|GO:0048037,cofactor binding|GO:0005515,protein binding|GO:0030414,peptidase inhibitor activity|GO:0031715,C5L2 anaphylatoxin chemotactic receptor binding|GO:000…	hsa05133,Pertussis|hsa04610,Complement and coagulation cascades|hsa05134,Legionellosis|hsa05322,Systemic lupus erythematosus|hsa05203,Viral carcinogenesis|hsa05142,Chagas disease (American trypanosomiasis)|hsa05140,Leishmaniasis|hsa04145,Phagosome|hsa05150,Staphylococcus aureus infection|hsa05152,Tuberculosis|hsa05168,Herpes simplex infection	http://www.uniprot.org/uniprot/P01024
P24557	1.67995	0.748418	P24557	TBXAS1	GO:0006633,fatty acid biosynthetic process|GO:0006631,fatty acid metabolic process|GO:0006636,unsaturated fatty acid biosynthetic process|GO:0019752,carboxylic acid metabolic process|GO:0043436,oxoacid metabolic process|GO:0009410,response to xenobiotic stimulus|GO:0044281,small molecule metabolic process|GO:0070887,cellular response to chemical stimulus|GO:0044283,small molecule biosynthetic pro…	GO:0005783,endoplasmic reticulum|GO:0005789,endoplasmic reticulum membrane|GO:0042175,nuclear outer membrane-endoplasmic reticulum membrane network|GO:0043229,intracellular organelle|GO:0043227,membrane-bounded organelle|GO:0043226,organelle|GO:0031224,intrinsic component of membrane|GO:0005737,cytoplasm|GO:0031090,organelle membrane|GO:0016021,integral component of membrane|GO:0016020,membrane|G…	GO:0043169,cation binding|GO:0004497,monooxygenase activity|GO:0046872,metal ion binding|GO:0016853,isomerase activity|GO:0020037,heme binding|GO:0046906,tetrapyrrole binding|GO:0097159,organic cyclic compound binding|GO:0016705,oxidoreductase activity, acting on paired donors, with incorporation or reduction of molecular oxygen|GO:0046914,transition metal ion binding|GO:0003824,catalytic activit…	hsa00590,Arachidonic acid metabolism|hsa04611,Platelet activation|hsa01100,Metabolic pathways	http://www.uniprot.org/uniprot/P24557
P62937	1.6889	0.756084	P62937	PPIA	GO:0008104,protein localization|GO:0007599,hemostasis|GO:0051046,regulation of secretion|GO:0051047,positive regulation of secretion|GO:0051049,regulation of transport|GO:0007596,blood coagulation|GO:0071840,cellular component organization or biogenesis|GO:0009611,response to wounding|GO:0018193,peptidyl-amino acid modification|GO:0044419,interspecies interaction between organisms|GO:0019058,vira…	GO:0043229,intracellular organelle|GO:0005924,cell-substrate adherens junction|GO:0005925,focal adhesion|GO:0043227,membrane-bounded organelle|GO:0043226,organelle|GO:0030054,cell junction|GO:0030055,cell-substrate junction|GO:0005737,cytoplasm|GO:0031982,vesicle|GO:0005615,extracellular space|GO:0005634,nucleus|GO:0016020,membrane|GO:0031988,membrane-bounded vesicle|GO:0070161,anchoring junction…	GO:0042277,peptide binding|GO:0016853,isomerase activity|GO:0005515,protein binding|GO:0033218,amide binding|GO:0044822,poly(A) RNA binding|GO:0051082,unfolded protein binding|GO:0016859,cis-trans isomerase activity|GO:0046790,virion binding|GO:0003824,catalytic activity|GO:0003723,RNA binding|GO:0003755,peptidyl-prolyl cis-trans isomerase activity|GO:0097159,organic cyclic compound binding|GO:19…		http://www.uniprot.org/uniprot/P62937
P40926	1.69625	0.762349	P40926	MDH2	GO:0044238,primary metabolic process|GO:0019674,NAD metabolic process|GO:0006732,coenzyme metabolic process|GO:0046364,monosaccharide biosynthetic process|GO:0006473,protein acetylation|GO:0006475,internal protein amino acid acetylation|GO:0019752,carboxylic acid metabolic process|GO:0044723,single-organism carbohydrate metabolic process|GO:0006099,tricarboxylic acid cycle|GO:0009060,aerobic resp…	GO:0044464,cell part|GO:0031974,membrane-enclosed lumen|GO:0031975,envelope|GO:0043229,intracellular organelle|GO:0071944,cell periphery|GO:0043227,membrane-bounded organelle|GO:0043226,organelle|GO:0005737,cytoplasm|GO:0070062,extracellular exosome|GO:0031981,nuclear lumen|GO:0005743,mitochondrial inner membrane|GO:0043209,myelin sheath|GO:0005634,nucleus|GO:0016020,membrane|GO:0044444,cytoplasm…	GO:0005488,binding|GO:0016614,oxidoreductase activity, acting on CH-OH group of donors|GO:0016615,malate dehydrogenase activity|GO:0016616,oxidoreductase activity, acting on the CH-OH group of donors, NAD or NADP as acceptor|GO:0043621,protein self-association|GO:0097159,organic cyclic compound binding|GO:0044822,poly(A) RNA binding|GO:0005515,protein binding|GO:0003824,catalytic activity|GO:0030…	hsa00620,Pyruvate metabolism|hsa01100,Metabolic pathways|hsa00630,Glyoxylate and dicarboxylate metabolism|hsa01200,Carbon metabolism|hsa01130,Biosynthesis of antibiotics|hsa00270,Cysteine and methionine metabolism|hsa00020,Citrate cycle (TCA cycle)	http://www.uniprot.org/uniprot/P40926
P01834	1.7008	0.766214	P01834	IGKC	GO:0044707,single-multicellular organism process|GO:0006909,phagocytosis|GO:0060249,anatomical structure homeostasis|GO:0006950,response to stress|GO:0048584,positive regulation of response to stimulus|GO:0048583,regulation of response to stimulus|GO:0042592,homeostatic process|GO:0023052,signaling|GO:0007165,signal transduction|GO:0007166,cell surface receptor signaling pathway|GO:0001894,tissue…	GO:0043230,extracellular organelle|GO:0031982,vesicle|GO:0044421,extracellular region part|GO:0043227,membrane-bounded organelle|GO:0016020,membrane|GO:0044464,cell part|GO:0005623,cell|GO:0031988,membrane-bounded vesicle|GO:0071944,cell periphery|GO:0005615,extracellular space|GO:0072562,blood microparticle|GO:0005886,plasma membrane|GO:0005576,extracellular region|GO:1903561,extracellular vesic…	GO:0005488,binding|GO:0003823,antigen binding		http://www.uniprot.org/uniprot/P01834
P14854	1.7052	0.769941	P14854	COX6B1	GO:0044707,single-multicellular organism process|GO:0032774,RNA biosynthetic process|GO:1902600,hydrogen ion transmembrane transport|GO:0006810,transport|GO:0006366,transcription from RNA polymerase II promoter|GO:0090304,nucleic acid metabolic process|GO:0044249,cellular biosynthetic process|GO:0034641,cellular nitrogen compound metabolic process|GO:0060322,head development|GO:0021762,substantia…	GO:0044464,cell part|GO:0031970,organelle envelope lumen|GO:0031974,membrane-enclosed lumen|GO:0031975,envelope|GO:0043229,intracellular organelle|GO:0043227,membrane-bounded organelle|GO:0043226,organelle|GO:0005737,cytoplasm|GO:0031090,organelle membrane|GO:0016020,membrane|GO:0044444,cytoplasmic part|GO:0005739,mitochondrion|GO:0005758,mitochondrial intermembrane space|GO:0031967,organelle env…	GO:0004129,cytochrome-c oxidase activity|GO:0022890,inorganic cation transmembrane transporter activity|GO:0022891,substrate-specific transmembrane transporter activity|GO:0022892,substrate-specific transporter activity|GO:0005215,transporter activity|GO:0008324,cation transmembrane transporter activity|GO:0022857,transmembrane transporter activity|GO:0015075,ion transmembrane transporter activit…	hsa00190,Oxidative phosphorylation|hsa04260,Cardiac muscle contraction|hsa01100,Metabolic pathways|hsa04932,Non-alcoholic fatty liver disease (NAFLD)|hsa05016,Huntington's disease|hsa05010,Alzheimer's disease|hsa05012,Parkinson's disease	http://www.uniprot.org/uniprot/P14854
P02656	1.7108	0.774671	P02656	APOC3	GO:0006633,fatty acid biosynthetic process|GO:0009628,response to abiotic stimulus|GO:0051234,establishment of localization|GO:0080090,regulation of primary metabolic process|GO:0034447,very-low-density lipoprotein particle clearance|GO:0051049,regulation of transport|GO:0048583,regulation of response to stimulus|GO:0035376,sterol import|GO:0006820,anion transport|GO:0007165,signal transduction|G…	GO:0034358,plasma lipoprotein particle|GO:0044421,extracellular region part|GO:0043229,intracellular organelle|GO:1990777,lipoprotein particle|GO:0005622,intracellular|GO:0043227,membrane-bounded organelle|GO:0043226,organelle|GO:0005737,cytoplasm|GO:0042627,chylomicron|GO:0031982,vesicle|GO:0005615,extracellular space|GO:0031988,membrane-bounded vesicle|GO:0034361,very-low-density lipoprotein pa…	GO:0043168,anion binding|GO:0055102,lipase inhibitor activity|GO:0015485,cholesterol binding|GO:0043178,alcohol binding|GO:0070325,lipoprotein particle receptor binding|GO:0030234,enzyme regulator activity|GO:0005543,phospholipid binding|GO:0097159,organic cyclic compound binding|GO:0008289,lipid binding|GO:0043167,ion binding|GO:0036094,small molecule binding|GO:0032934,sterol binding|GO:0005488…	hsa03320,PPAR signaling pathway	http://www.uniprot.org/uniprot/P02656
O15144	1.7164	0.779386	O15144	ARPC2	GO:0006909,phagocytosis|GO:0034446,substrate adhesion-dependent cell spreading|GO:0048584,positive regulation of response to stimulus|GO:0048583,regulation of response to stimulus|GO:0008064,regulation of actin polymerization or depolymerization|GO:0060491,regulation of cell projection assembly|GO:0007165,signal transduction|GO:0007166,cell surface receptor signaling pathway|GO:0007167,enzyme lin…	GO:0015629,actin cytoskeleton|GO:0043229,intracellular organelle|GO:0043228,non-membrane-bounded organelle|GO:0045202,synapse|GO:0005924,cell-substrate adherens junction|GO:0005925,focal adhesion|GO:0043227,membrane-bounded organelle|GO:0043226,organelle|GO:0030054,cell junction|GO:0030055,cell-substrate junction|GO:0005856,cytoskeleton|GO:0042995,cell projection|GO:0070062,extracellular exosome|…	GO:0071933,Arp2/3 complex binding|GO:0005200,structural constituent of cytoskeleton|GO:0008092,cytoskeletal protein binding|GO:0051015,actin filament binding|GO:0005198,structural molecule activity|GO:0003779,actin binding|GO:0019894,kinesin binding|GO:0044877,macromolecular complex binding|GO:0005488,binding|GO:0005515,protein binding|GO:0035650,AP-1 adaptor complex binding|GO:0032403,protein co…	hsa05132,Salmonella infection|hsa05131,Shigellosis|hsa05130,Pathogenic Escherichia coli infection|hsa05100,Bacterial invasion of epithelial cells|hsa04144,Endocytosis|hsa04666,Fc gamma R-mediated phagocytosis|hsa04810,Regulation of actin cytoskeleton	http://www.uniprot.org/uniprot/O15144
P68871	1.7225	0.784504	P68871	HBB	GO:0007599,hemostasis|GO:0019222,regulation of metabolic process|GO:0007596,blood coagulation|GO:0006820,anion transport|GO:0003013,circulatory system process|GO:0003014,renal system process|GO:0044281,small molecule metabolic process|GO:0003018,vascular process in circulatory system|GO:0071840,cellular component organization or biogenesis|GO:0044712,single-organism catabolic process|GO:0044710,s…	GO:0031974,membrane-enclosed lumen|GO:0030139,endocytic vesicle|GO:0043229,intracellular organelle|GO:0060205,cytoplasmic membrane-bounded vesicle lumen|GO:0031988,membrane-bounded vesicle|GO:0043227,membrane-bounded organelle|GO:0043226,organelle|GO:0005737,cytoplasm|GO:0031983,vesicle lumen|GO:0070062,extracellular exosome|GO:0071682,endocytic vesicle lumen|GO:0016023,cytoplasmic membrane-bound…	GO:0005344,oxygen transporter activity|GO:0005488,binding|GO:1901363,heterocyclic compound binding|GO:0016491,oxidoreductase activity|GO:0043169,cation binding|GO:0016684,oxidoreductase activity, acting on peroxide as acceptor|GO:0046914,transition metal ion binding|GO:0043167,ion binding|GO:0005506,iron ion binding|GO:0046872,metal ion binding|GO:0020037,heme binding|GO:0005215,transporter activ…	hsa05143,African trypanosomiasis|hsa05144,Malaria	http://www.uniprot.org/uniprot/P68871
P45880	1.72705	0.78831	P45880	VDAC2	GO:2001234,negative regulation of apoptotic signaling pathway|GO:0022607,cellular component assembly|GO:0006461,protein complex assembly|GO:0051234,establishment of localization|GO:2001233,regulation of apoptotic signaling pathway|GO:0043933,macromolecular complex subunit organization|GO:0051049,regulation of transport|GO:0048585,negative regulation of response to stimulus|GO:0034622,cellular mac…	GO:0098796,membrane protein complex|GO:0044421,extracellular region part|GO:0044464,cell part|GO:0031974,membrane-enclosed lumen|GO:0031975,envelope|GO:0043229,intracellular organelle|GO:0043228,non-membrane-bounded organelle|GO:0042645,mitochondrial nucleoid|GO:0043227,membrane-bounded organelle|GO:0043226,organelle|GO:0031224,intrinsic component of membrane|GO:0005737,cytoplasm|GO:0046930,pore …	GO:0015288,porin activity|GO:0005488,binding|GO:0022838,substrate-specific channel activity|GO:1901363,heterocyclic compound binding|GO:1901265,nucleoside phosphate binding|GO:0008509,anion transmembrane transporter activity|GO:0000166,nucleotide binding|GO:0022829,wide pore channel activity|GO:0022803,passive transmembrane transporter activity|GO:0005253,anion channel activity|GO:0005215,transpo…	hsa04022,cGMP-PKG signaling pathway|hsa04020,Calcium signaling pathway|hsa05166,HTLV-I infection|hsa05016,Huntington's disease|hsa05012,Parkinson's disease	http://www.uniprot.org/uniprot/P45880
P62942	1.8058	0.852638	P62942	FKBP1A	GO:0044238,primary metabolic process|GO:0032924,activin receptor signaling pathway|GO:0032925,regulation of activin receptor signaling pathway|GO:0019222,regulation of metabolic process|GO:0051049,regulation of transport|GO:0032386,regulation of intracellular transport|GO:0048584,positive regulation of response to stimulus|GO:0051282,regulation of sequestering of calcium ion|GO:0051283,negative r…	GO:0005783,endoplasmic reticulum|GO:0005789,endoplasmic reticulum membrane|GO:0030016,myofibril|GO:0030017,sarcomere|GO:0043229,intracellular organelle|GO:0043228,non-membrane-bounded organelle|GO:0005623,cell|GO:0043227,membrane-bounded organelle|GO:0043226,organelle|GO:0030018,Z disc|GO:0005737,cytoplasm|GO:0031984,organelle subcompartment|GO:0070062,extracellular exosome|GO:0016020,membrane|GO…	GO:0005126,cytokine receptor binding|GO:0005160,transforming growth factor beta receptor binding|GO:0008144,drug binding|GO:0060089,molecular transducer activity|GO:0044877,macromolecular complex binding|GO:0005488,binding|GO:0004871,signal transducer activity|GO:0044325,ion channel binding|GO:0098772,molecular function regulator|GO:1901363,heterocyclic compound binding|GO:0019855,calcium channel…		http://www.uniprot.org/uniprot/P62942
P30405	1.80665	0.853317	P30405	PPIF	GO:2001234,negative regulation of apoptotic signaling pathway|GO:2001235,positive regulation of apoptotic signaling pathway|GO:0019220,regulation of phosphate metabolic process|GO:0080090,regulation of primary metabolic process|GO:0019222,regulation of metabolic process|GO:2001233,regulation of apoptotic signaling pathway|GO:0051049,regulation of transport|GO:0048585,negative regulation of respon…	GO:0098796,membrane protein complex|GO:0044464,cell part|GO:0031974,membrane-enclosed lumen|GO:0031975,envelope|GO:0043229,intracellular organelle|GO:0043227,membrane-bounded organelle|GO:0043226,organelle|GO:0005737,cytoplasm|GO:0031090,organelle membrane|GO:0005743,mitochondrial inner membrane|GO:0016020,membrane|GO:0044444,cytoplasmic part|GO:0005739,mitochondrion|GO:0098800,inner mitochondria…	GO:0042277,peptide binding|GO:0016853,isomerase activity|GO:0033218,amide binding|GO:0008144,drug binding|GO:0003824,catalytic activity|GO:0005515,protein binding|GO:0003755,peptidyl-prolyl cis-trans isomerase activity|GO:0016018,cyclosporin A binding|GO:0016859,cis-trans isomerase activity|GO:0005488,binding	hsa04022,cGMP-PKG signaling pathway|hsa04020,Calcium signaling pathway|hsa05016,Huntington's disease|hsa05012,Parkinson's disease|hsa05145,Toxoplasmosis	http://www.uniprot.org/uniprot/P30405
P04196	1.84445	0.883191	P04196	HRG	GO:0043933,macromolecular complex subunit organization|GO:0019220,regulation of phosphate metabolic process|GO:0080090,regulation of primary metabolic process|GO:0019222,regulation of metabolic process|GO:1901890,positive regulation of cell junction assembly|GO:0048585,negative regulation of response to stimulus|GO:0048584,positive regulation of response to stimulus|GO:0048583,regulation of respo…	GO:0005886,plasma membrane|GO:0031974,membrane-enclosed lumen|GO:0043229,intracellular organelle|GO:0071944,cell periphery|GO:0060205,cytoplasmic membrane-bounded vesicle lumen|GO:0043227,membrane-bounded organelle|GO:0043226,organelle|GO:0005737,cytoplasm|GO:0031983,vesicle lumen|GO:0070062,extracellular exosome|GO:0031093,platelet alpha granule lumen|GO:0016023,cytoplasmic membrane-bounded vesi…	GO:0030414,peptidase inhibitor activity|GO:0044877,macromolecular complex binding|GO:0008270,zinc ion binding|GO:0004857,enzyme inhibitor activity|GO:0098772,molecular function regulator|GO:1901363,heterocyclic compound binding|GO:0001948,glycoprotein binding|GO:1901681,sulfur compound binding|GO:0043169,cation binding|GO:0046914,transition metal ion binding|GO:0043167,ion binding|GO:0032403,prot…		http://www.uniprot.org/uniprot/P04196
P69905	1.9037	0.928806	P69905	HBA1	GO:0015701,bicarbonate transport|GO:0022607,cellular component assembly|GO:0070271,protein complex biogenesis|GO:0043933,macromolecular complex subunit organization|GO:0000302,response to reactive oxygen species|GO:0044248,cellular catabolic process|GO:0006820,anion transport|GO:0042744,hydrogen peroxide catabolic process|GO:0042743,hydrogen peroxide metabolic process|GO:0044281,small molecule me…	GO:0022626,cytosolic ribosome|GO:0022627,cytosolic small ribosomal subunit|GO:0031974,membrane-enclosed lumen|GO:0030139,endocytic vesicle|GO:0043229,intracellular organelle|GO:0043228,non-membrane-bounded organelle|GO:0060205,cytoplasmic membrane-bounded vesicle lumen|GO:0005833,hemoglobin complex|GO:0043227,membrane-bounded organelle|GO:0043226,organelle|GO:0015935,small ribosomal subunit|GO:00…	GO:0005344,oxygen transporter activity|GO:0005488,binding|GO:1901363,heterocyclic compound binding|GO:0016491,oxidoreductase activity|GO:0043169,cation binding|GO:0016684,oxidoreductase activity, acting on peroxide as acceptor|GO:0046914,transition metal ion binding|GO:0043167,ion binding|GO:0005506,iron ion binding|GO:0046872,metal ion binding|GO:0020037,heme binding|GO:0005215,transporter activ…	hsa05143,African trypanosomiasis|hsa05144,Malaria	http://www.uniprot.org/uniprot/P69905
P60709	1.90675	0.931116	P60709	ACTB	GO:0006909,phagocytosis|GO:0007409,axonogenesis|GO:0060249,anatomical structure homeostasis|GO:0048584,positive regulation of response to stimulus|GO:0048583,regulation of response to stimulus|GO:0061024,membrane organization|GO:0060322,head development|GO:0007165,signal transduction|GO:0007166,cell surface receptor signaling pathway|GO:0007167,enzyme linked receptor protein signaling pathway|GO:…	GO:0031248,protein acetyltransferase complex|GO:0016020,membrane|GO:0035770,ribonucleoprotein granule|GO:0005924,cell-substrate adherens junction|GO:0031974,membrane-enclosed lumen|GO:0005623,cell|GO:0043229,intracellular organelle|GO:0043228,non-membrane-bounded organelle|GO:0000785,chromatin|GO:0035267,NuA4 histone acetyltransferase complex|GO:1902562,H4 histone acetyltransferase complex|GO:000…	GO:0019894,kinesin binding|GO:0019899,enzyme binding|GO:0005200,structural constituent of cytoskeleton|GO:0035639,purine ribonucleoside triphosphate binding|GO:0001012,RNA polymerase II regulatory region DNA binding|GO:0001159,core promoter proximal region DNA binding|GO:0001158,enhancer sequence-specific DNA binding|GO:0031491,nucleosome binding|GO:0031490,chromatin DNA binding|GO:0031492,nucleo…	hsa05132,Salmonella infection|hsa05131,Shigellosis|hsa05130,Pathogenic Escherichia coli infection|hsa04611,Platelet activation|hsa04530,Tight junction|hsa04670,Leukocyte transendothelial migration|hsa04145,Phagosome|hsa04510,Focal adhesion|hsa05410,Hypertrophic cardiomyopathy (HCM)|hsa05412,Arrhythmogenic right ventricular cardiomyopathy (ARVC)|hsa05414,Dilated cardiomyopathy|hsa04921,Oxytocin si…	http://www.uniprot.org/uniprot/P60709
P52907	1.90835	0.932326	P52907	CAPZA1	GO:0022607,cellular component assembly|GO:0007599,hemostasis|GO:0033043,regulation of organelle organization|GO:0043933,macromolecular complex subunit organization|GO:0050896,response to stimulus|GO:1901879,regulation of protein depolymerization|GO:0051129,negative regulation of cellular component organization|GO:0051128,regulation of cellular component organization|GO:0008064,regulation of actin…	GO:0015629,actin cytoskeleton|GO:0043229,intracellular organelle|GO:0043228,non-membrane-bounded organelle|GO:0043227,membrane-bounded organelle|GO:0043226,organelle|GO:0030054,cell junction|GO:0005856,cytoskeleton|GO:0031982,vesicle|GO:0016020,membrane|GO:0031988,membrane-bounded vesicle|GO:0044430,cytoskeletal part|GO:0005576,extracellular region|GO:0005737,cytoplasm|GO:0005938,cell cortex|GO:0…	GO:0008092,cytoskeletal protein binding|GO:0051015,actin filament binding|GO:0003779,actin binding|GO:0044877,macromolecular complex binding|GO:0005488,binding|GO:0005515,protein binding|GO:0032403,protein complex binding	hsa04144,Endocytosis	http://www.uniprot.org/uniprot/P52907
P02649	1.9163	0.938323	P02649	APOE	GO:0051043,regulation of membrane protein ectodomain proteolysis|GO:0051044,positive regulation of membrane protein ectodomain proteolysis|GO:0051049,regulation of transport|GO:0001667,ameboidal-type cell migration|GO:0007596,blood coagulation|GO:0016358,dendrite development|GO:0009165,nucleotide biosynthetic process|GO:0044281,small molecule metabolic process|GO:0044282,small molecule catabolic …	GO:0042995,cell projection|GO:0005783,endoplasmic reticulum|GO:0034361,very-low-density lipoprotein particle|GO:0044421,extracellular region part|GO:0031974,membrane-enclosed lumen|GO:0031012,extracellular matrix|GO:0030139,endocytic vesicle|GO:0043229,intracellular organelle|GO:0071944,cell periphery|GO:1990777,lipoprotein particle|GO:0060205,cytoplasmic membrane-bounded vesicle lumen|GO:0005622…	GO:0017127,cholesterol transporter activity|GO:0070325,lipoprotein particle receptor binding|GO:0044877,macromolecular complex binding|GO:0008047,enzyme activator activity|GO:0098772,molecular function regulator|GO:0060228,phosphatidylcholine-sterol O-acyltransferase activator activity|GO:1901681,sulfur compound binding|GO:0043169,cation binding|GO:0046911,metal chelating activity|GO:0001540,beta…	hsa05010,Alzheimer's disease	http://www.uniprot.org/uniprot/P02649
P50416	1.93345	0.951177	P50416	CPT1A	GO:0090087,regulation of peptide transport|GO:0034440,lipid oxidation|GO:0044238,primary metabolic process|GO:0015879,carnitine transport|GO:0080090,regulation of primary metabolic process|GO:0019222,regulation of metabolic process|GO:0051049,regulation of transport|GO:0007610,behavior|GO:0006839,mitochondrial transport|GO:0006820,anion transport|GO:0008104,protein localization|GO:0044281,small m…	GO:0044464,cell part|GO:0098573,intrinsic component of mitochondrial membrane|GO:0019867,outer membrane|GO:0043229,intracellular organelle|GO:0031306,intrinsic component of mitochondrial outer membrane|GO:0031301,integral component of organelle membrane|GO:0031300,intrinsic component of organelle membrane|GO:0032592,integral component of mitochondrial membrane|GO:0043227,membrane-bounded organell…	GO:0016416,O-palmitoyltransferase activity|GO:0003824,catalytic activity|GO:0016740,transferase activity|GO:0016406,carnitine O-acyltransferase activity|GO:0004095,carnitine O-palmitoyltransferase activity|GO:0016747,transferase activity, transferring acyl groups other than amino-acyl groups|GO:0005515,protein binding|GO:0008374,O-acyltransferase activity|GO:0016746,transferase activity, transfer…	hsa01212,Fatty acid metabolism|hsa03320,PPAR signaling pathway|hsa00071,Fatty acid degradation|hsa04152,AMPK signaling pathway|hsa04922,Glucagon signaling pathway|hsa04920,Adipocytokine signaling pathway	http://www.uniprot.org/uniprot/P50416
Q9Y277	1.94615	0.960623	Q9Y277	VDAC3	GO:0022604,regulation of cell morphogenesis|GO:0022607,cellular component assembly|GO:0015853,adenine transport|GO:0015851,nucleobase transport|GO:0033043,regulation of organelle organization|GO:0030030,cell projection organization|GO:0051049,regulation of transport|GO:0006863,purine nucleobase transport|GO:0051128,regulation of cellular component organization|GO:0060491,regulation of cell projec…	GO:0044421,extracellular region part|GO:0031975,envelope|GO:0043229,intracellular organelle|GO:0043227,membrane-bounded organelle|GO:0043226,organelle|GO:0031224,intrinsic component of membrane|GO:0005737,cytoplasm|GO:0046930,pore complex|GO:0031982,vesicle|GO:0005634,nucleus|GO:0016020,membrane|GO:0044444,cytoplasmic part|GO:0005739,mitochondrion|GO:0031988,membrane-bounded vesicle|GO:0005576,ex…	GO:0015288,porin activity|GO:0005488,binding|GO:0022838,substrate-specific channel activity|GO:1901363,heterocyclic compound binding|GO:1901265,nucleoside phosphate binding|GO:0008509,anion transmembrane transporter activity|GO:0000166,nucleotide binding|GO:0022829,wide pore channel activity|GO:0022803,passive transmembrane transporter activity|GO:0005253,anion channel activity|GO:0005215,transpo…	hsa04022,cGMP-PKG signaling pathway|hsa04020,Calcium signaling pathway|hsa05203,Viral carcinogenesis|hsa05161,Hepatitis B|hsa05166,HTLV-I infection|hsa05016,Huntington's disease|hsa05012,Parkinson's disease	http://www.uniprot.org/uniprot/Q9Y277
P48047	1.95275	0.965507	P48047	ATP5O	GO:0009167,purine ribonucleoside monophosphate metabolic process|GO:0009165,nucleotide biosynthetic process|GO:0009163,nucleoside biosynthetic process|GO:0009161,ribonucleoside monophosphate metabolic process|GO:1901362,organic cyclic compound biosynthetic process|GO:0042451,purine nucleoside biosynthetic process|GO:0009168,purine ribonucleoside monophosphate biosynthetic process|GO:0044710,singl…	GO:0044464,cell part|GO:0031975,envelope|GO:0043229,intracellular organelle|GO:0071944,cell periphery|GO:0031988,membrane-bounded vesicle|GO:0043227,membrane-bounded organelle|GO:0043226,organelle|GO:0005737,cytoplasm|GO:0031090,organelle membrane|GO:0098796,membrane protein complex|GO:0005634,nucleus|GO:0016020,membrane|GO:0044444,cytoplasmic part|GO:0005739,mitochondrion|GO:0098800,inner mitoch…	GO:0008144,drug binding|GO:0005488,binding|GO:0016887,ATPase activity|GO:0042625,ATPase activity, coupled to transmembrane movement of ions|GO:0042626,ATPase activity, coupled to transmembrane movement of substances|GO:0016820,hydrolase activity, acting on acid anhydrides, catalyzing transmembrane movement of substances|GO:0046933,proton-transporting ATP synthase activity, rotational mechanism|GO…	hsa05016,Huntington's disease|hsa01100,Metabolic pathways|hsa05010,Alzheimer's disease|hsa05012,Parkinson's disease|hsa00190,Oxidative phosphorylation	http://www.uniprot.org/uniprot/P48047
Q96CW1	1.95755	0.969049	Q96CW1	AP2M1	GO:0002495,antigen processing and presentation of peptide antigen via MHC class II|GO:0008104,protein localization|GO:0050688,regulation of defense response to virus|GO:0048585,negative regulation of response to stimulus|GO:0048583,regulation of response to stimulus|GO:0061024,membrane organization|GO:0007009,plasma membrane organization|GO:0007165,signal transduction|GO:0007166,cell surface rece…	GO:0098796,membrane protein complex|GO:0000323,lytic vacuole|GO:0044464,cell part|GO:0030139,endocytic vesicle|GO:0043229,intracellular organelle|GO:0071944,cell periphery|GO:0030117,membrane coat|GO:0005905,coated pit|GO:0005773,vacuole|GO:0030131,clathrin adaptor complex|GO:0030119,AP-type membrane coat adaptor complex|GO:0005774,vacuolar membrane|GO:0030135,coated vesicle|GO:0043226,organelle|…	GO:0030674,protein binding, bridging|GO:0042277,peptide binding|GO:0005048,signal sequence binding|GO:0005215,transporter activity|GO:0008289,lipid binding|GO:0070325,lipoprotein particle receptor binding|GO:0098748,endocytic adaptor activity|GO:0005488,binding|GO:0005515,protein binding|GO:0033218,amide binding|GO:0030276,clathrin binding|GO:0005102,receptor binding|GO:0050750,low-density lipopr…	hsa04721,Synaptic vesicle cycle|hsa05016,Huntington's disease|hsa04961,Endocrine and other factor-regulated calcium reabsorption|hsa04144,Endocytosis	http://www.uniprot.org/uniprot/Q96CW1
P14406	2.0807	1.05707	P14406	COX7A2	GO:0044699,single-organism process|GO:0006818,hydrogen transport|GO:0015992,proton transport|GO:0051234,establishment of localization|GO:1902600,hydrogen ion transmembrane transport|GO:0006812,cation transport|GO:0006811,ion transport|GO:0009987,cellular process|GO:0015672,monovalent inorganic cation transport|GO:0034220,ion transmembrane transport|GO:0044765,single-organism transport|GO:0044763,…	GO:0044464,cell part|GO:0031975,envelope|GO:0043229,intracellular organelle|GO:0043227,membrane-bounded organelle|GO:0043226,organelle|GO:0005737,cytoplasm|GO:0031982,vesicle|GO:0016020,membrane|GO:0044444,cytoplasmic part|GO:0005739,mitochondrion|GO:0031988,membrane-bounded vesicle|GO:0044455,mitochondrial membrane part|GO:0031967,organelle envelope|GO:0031966,mitochondrial membrane|GO:1903561,e…	GO:0004129,cytochrome-c oxidase activity|GO:0022890,inorganic cation transmembrane transporter activity|GO:0022891,substrate-specific transmembrane transporter activity|GO:0022892,substrate-specific transporter activity|GO:0005215,transporter activity|GO:0008324,cation transmembrane transporter activity|GO:0022857,transmembrane transporter activity|GO:0015075,ion transmembrane transporter activit…	hsa00190,Oxidative phosphorylation|hsa04260,Cardiac muscle contraction|hsa04932,Non-alcoholic fatty liver disease (NAFLD)|hsa05016,Huntington's disease|hsa05010,Alzheimer's disease|hsa05012,Parkinson's disease	http://www.uniprot.org/uniprot/P14406
P01861	2.11265	1.07905	P01861	IGHG4	GO:0044238,primary metabolic process|GO:0006909,phagocytosis|GO:0006950,response to stress|GO:0048584,positive regulation of response to stimulus|GO:0048583,regulation of response to stimulus|GO:0023052,signaling|GO:0007165,signal transduction|GO:0007166,cell surface receptor signaling pathway|GO:0002455,humoral immune response mediated by circulating immunoglobulin|GO:0050789,regulation of biolo…	GO:0043230,extracellular organelle|GO:0031982,vesicle|GO:0044421,extracellular region part|GO:0043227,membrane-bounded organelle|GO:0072562,blood microparticle|GO:0031988,membrane-bounded vesicle|GO:0005576,extracellular region|GO:0005615,extracellular space|GO:1903561,extracellular vesicle|GO:0065010,extracellular membrane-bounded organelle|GO:0043226,organelle|GO:0070062,extracellular exosome	GO:0005488,binding|GO:0003823,antigen binding		http://www.uniprot.org/uniprot/P01861
Q96DZ9	2.1282	1.08963	Q96DZ9	CMTM5	GO:0030154,cell differentiation|GO:0045445,myoblast differentiation|GO:0051147,regulation of muscle cell differentiation|GO:0061061,muscle structure development|GO:0051148,negative regulation of muscle cell differentiation|GO:0050789,regulation of biological process|GO:0044699,single-organism process|GO:0042330,taxis|GO:0048869,cellular developmental process|GO:0065007,biological regulation|GO:00…	GO:0005615,extracellular space|GO:0016021,integral component of membrane|GO:0016020,membrane|GO:0005576,extracellular region|GO:0044425,membrane part|GO:0044421,extracellular region part|GO:0031224,intrinsic component of membrane	GO:0005102,receptor binding|GO:0005125,cytokine activity|GO:0005488,binding|GO:0005515,protein binding		http://www.uniprot.org/uniprot/Q96DZ9
P00747	2.14845	1.1033	P00747	PLG	GO:0007599,hemostasis|GO:0048585,negative regulation of response to stimulus|GO:0048584,positive regulation of response to stimulus|GO:0048583,regulation of response to stimulus|GO:0048771,tissue remodeling|GO:0007162,negative regulation of cell adhesion|GO:0071840,cellular component organization or biogenesis|GO:0009611,response to wounding|GO:0048518,positive regulation of biological process|GO…	GO:0019897,extrinsic component of plasma membrane|GO:0009897,external side of plasma membrane|GO:0098552,side of membrane|GO:0031974,membrane-enclosed lumen|GO:0019898,extrinsic component of membrane|GO:0043229,intracellular organelle|GO:0071944,cell periphery|GO:0060205,cytoplasmic membrane-bounded vesicle lumen|GO:0043227,membrane-bounded organelle|GO:0043226,organelle|GO:0005737,cytoplasm|GO:0…	GO:0005488,binding|GO:0004252,serine-type endopeptidase activity|GO:0004175,endopeptidase activity|GO:0017171,serine hydrolase activity|GO:0016787,hydrolase activity|GO:0034185,apolipoprotein binding|GO:0003824,catalytic activity|GO:0070011,peptidase activity, acting on L-amino acid peptides|GO:0019904,protein domain specific binding|GO:0005515,protein binding|GO:0008233,peptidase activity|GO:000…	hsa05164,Influenza A|hsa04080,Neuroactive ligand-receptor interaction|hsa04610,Complement and coagulation cascades|hsa05150,Staphylococcus aureus infection	http://www.uniprot.org/uniprot/P00747
O15260	2.19805	1.13622	O15260	SURF4	GO:0008104,protein localization|GO:0033043,regulation of organelle organization|GO:0051128,regulation of cellular component organization|GO:0051641,cellular localization|GO:0050789,regulation of biological process|GO:0044699,single-organism process|GO:0070727,cellular macromolecule localization|GO:0071840,cellular component organization or biogenesis|GO:0010256,endomembrane system organization|GO…	GO:0005783,endoplasmic reticulum|GO:0033116,endoplasmic reticulum-Golgi intermediate compartment membrane|GO:0005789,endoplasmic reticulum membrane|GO:0042175,nuclear outer membrane-endoplasmic reticulum membrane network|GO:0043229,intracellular organelle|GO:0005622,intracellular|GO:0043227,membrane-bounded organelle|GO:0043226,organelle|GO:0031224,intrinsic component of membrane|GO:0005737,cytop…	GO:0005488,binding|GO:0005515,protein binding		http://www.uniprot.org/uniprot/O15260
P00738	2.22855	1.15611	P00738	HP	GO:0044710,single-organism metabolic process|GO:0009607,response to biotic stimulus|GO:0009894,regulation of catabolic process|GO:0009895,negative regulation of catabolic process|GO:0009892,negative regulation of metabolic process|GO:0006954,inflammatory response|GO:0019222,regulation of metabolic process|GO:0048585,negative regulation of response to stimulus|GO:0031324,negative regulation of cel…	GO:0031974,membrane-enclosed lumen|GO:0030139,endocytic vesicle|GO:0043229,intracellular organelle|GO:0060205,cytoplasmic membrane-bounded vesicle lumen|GO:0043227,membrane-bounded organelle|GO:0043226,organelle|GO:0005737,cytoplasm|GO:0031983,vesicle lumen|GO:0070062,extracellular exosome|GO:0071682,endocytic vesicle lumen|GO:0016023,cytoplasmic membrane-bounded vesicle|GO:0031410,cytoplasmic ve…	GO:0030492,hemoglobin binding|GO:0016209,antioxidant activity|GO:0005488,binding|GO:0005515,protein binding		http://www.uniprot.org/uniprot/P00738
P21291	2.2508	1.17044	P21291	CSRP1	GO:0016337,single organismal cell-cell adhesion|GO:0007596,blood coagulation|GO:0032501,multicellular organismal process|GO:0007599,hemostasis|GO:0044699,single-organism process|GO:0009611,response to wounding|GO:0065007,biological regulation|GO:0065008,regulation of biological quality|GO:0098602,single organism cell adhesion|GO:0050878,regulation of body fluid levels|GO:0098609,cell-cell adhesio…	GO:0043229,intracellular organelle|GO:0005924,cell-substrate adherens junction|GO:0005925,focal adhesion|GO:0043227,membrane-bounded organelle|GO:0043226,organelle|GO:0030054,cell junction|GO:0030055,cell-substrate junction|GO:0031982,vesicle|GO:0005634,nucleus|GO:0031988,membrane-bounded vesicle|GO:0070161,anchoring junction|GO:0005912,adherens junction|GO:1903561,extracellular vesicle|GO:007006…	GO:0005488,binding|GO:0043169,cation binding|GO:0046914,transition metal ion binding|GO:0097159,organic cyclic compound binding|GO:0044822,poly(A) RNA binding|GO:0043167,ion binding|GO:0008270,zinc ion binding|GO:0003676,nucleic acid binding|GO:0046872,metal ion binding|GO:1901363,heterocyclic compound binding|GO:0003723,RNA binding		http://www.uniprot.org/uniprot/P21291
P02042	2.2587	1.17549	P02042	HBD	GO:0051234,establishment of localization|GO:0044699,single-organism process|GO:0032501,multicellular organismal process|GO:0007599,hemostasis|GO:0044707,single-multicellular organism process|GO:0050878,regulation of body fluid levels|GO:0006950,response to stress|GO:0050896,response to stimulus|GO:0007596,blood coagulation|GO:0009611,response to wounding|GO:0042060,wound healing|GO:0015669,gas tr…	GO:0043234,protein complex|GO:0005737,cytoplasm|GO:0032991,macromolecular complex|GO:0005615,extracellular space|GO:0005829,cytosol|GO:0044464,cell part|GO:0005623,cell|GO:0005833,hemoglobin complex|GO:0044444,cytoplasmic part|GO:0044445,cytosolic part|GO:0072562,blood microparticle|GO:0044424,intracellular part|GO:0005622,intracellular|GO:0044421,extracellular region part|GO:0005576,extracellula…	GO:0043169,cation binding|GO:0005344,oxygen transporter activity|GO:0022892,substrate-specific transporter activity|GO:0046914,transition metal ion binding|GO:0020037,heme binding|GO:0046906,tetrapyrrole binding|GO:0005215,transporter activity|GO:0043167,ion binding|GO:0019825,oxygen binding|GO:0005488,binding|GO:0005515,protein binding|GO:0097159,organic cyclic compound binding|GO:0005506,iron i…		http://www.uniprot.org/uniprot/P02042
P02790	2.2924	1.19686	P02790	HPX	GO:0019220,regulation of phosphate metabolic process|GO:0019221,cytokine-mediated signaling pathway|GO:0019222,regulation of metabolic process|GO:0048584,positive regulation of response to stimulus|GO:0048583,regulation of response to stimulus|GO:0006778,porphyrin-containing compound metabolic process|GO:0031349,positive regulation of defense response|GO:0002706,regulation of lymphocyte mediated …	GO:0031974,membrane-enclosed lumen|GO:0030139,endocytic vesicle|GO:0043229,intracellular organelle|GO:0060205,cytoplasmic membrane-bounded vesicle lumen|GO:0043227,membrane-bounded organelle|GO:0043226,organelle|GO:0005737,cytoplasm|GO:0031983,vesicle lumen|GO:0070062,extracellular exosome|GO:0071682,endocytic vesicle lumen|GO:0016023,cytoplasmic membrane-bounded vesicle|GO:0031410,cytoplasmic ve…	GO:0051184,cofactor transporter activity|GO:0015232,heme transporter activity|GO:0043169,cation binding|GO:0005215,transporter activity|GO:0043167,ion binding|GO:0005488,binding|GO:0005515,protein binding|GO:0046872,metal ion binding		http://www.uniprot.org/uniprot/P02790
P02652	2.29435	1.19809	P02652	APOA2	GO:1901566,organonitrogen compound biosynthetic process|GO:0008104,protein localization|GO:0080090,regulation of primary metabolic process|GO:0019222,regulation of metabolic process|GO:0046340,diacylglycerol catabolic process|GO:0051048,negative regulation of secretion|GO:0051049,regulation of transport|GO:0048585,negative regulation of response to stimulus|GO:0048583,regulation of response to st…	GO:0005783,endoplasmic reticulum|GO:0044421,extracellular region part|GO:0031974,membrane-enclosed lumen|GO:0043229,intracellular organelle|GO:1990777,lipoprotein particle|GO:0005622,intracellular|GO:0043227,membrane-bounded organelle|GO:0043226,organelle|GO:0034358,plasma lipoprotein particle|GO:0005737,cytoplasm|GO:0042627,chylomicron|GO:0070062,extracellular exosome|GO:0005615,extracellular sp…	GO:0017127,cholesterol transporter activity|GO:0044877,macromolecular complex binding|GO:0008047,enzyme activator activity|GO:0004857,enzyme inhibitor activity|GO:0098772,molecular function regulator|GO:0060228,phosphatidylcholine-sterol O-acyltransferase activator activity|GO:0034190,apolipoprotein receptor binding|GO:0043168,anion binding|GO:0043169,cation binding|GO:0055102,lipase inhibitor ac…	hsa03320,PPAR signaling pathway	http://www.uniprot.org/uniprot/P02652
O15511	2.44605	1.29045	O15511	ARPC5	GO:0006909,phagocytosis|GO:0048584,positive regulation of response to stimulus|GO:0048583,regulation of response to stimulus|GO:0008064,regulation of actin polymerization or depolymerization|GO:0007165,signal transduction|GO:0007166,cell surface receptor signaling pathway|GO:0007167,enzyme linked receptor protein signaling pathway|GO:0030182,neuron differentiation|GO:0007169,transmembrane recepto…	GO:0015629,actin cytoskeleton|GO:0043229,intracellular organelle|GO:0043228,non-membrane-bounded organelle|GO:0005924,cell-substrate adherens junction|GO:0005925,focal adhesion|GO:0043227,membrane-bounded organelle|GO:0043226,organelle|GO:0030054,cell junction|GO:0030055,cell-substrate junction|GO:0005856,cytoskeleton|GO:0042995,cell projection|GO:0031982,vesicle|GO:0031988,membrane-bounded vesic…	GO:0005200,structural constituent of cytoskeleton|GO:0008092,cytoskeletal protein binding|GO:0051015,actin filament binding|GO:0005198,structural molecule activity|GO:0003779,actin binding|GO:0044877,macromolecular complex binding|GO:0005488,binding|GO:0005515,protein binding|GO:0032403,protein complex binding	hsa05132,Salmonella infection|hsa05131,Shigellosis|hsa05130,Pathogenic Escherichia coli infection|hsa05100,Bacterial invasion of epithelial cells|hsa04144,Endocytosis|hsa04666,Fc gamma R-mediated phagocytosis|hsa04810,Regulation of actin cytoskeleton	http://www.uniprot.org/uniprot/O15511
P0C0L4	2.6026	1.37995	P0C0L4	C4A	GO:0006909,phagocytosis|GO:0080090,regulation of primary metabolic process|GO:0019222,regulation of metabolic process|GO:0051049,regulation of transport|GO:0048584,positive regulation of response to stimulus|GO:0048583,regulation of response to stimulus|GO:0002455,humoral immune response mediated by circulating immunoglobulin|GO:0031347,regulation of defense response|GO:0044710,single-organism me…	GO:0043230,extracellular organelle|GO:0031982,vesicle|GO:0044421,extracellular region part|GO:0043227,membrane-bounded organelle|GO:0016020,membrane|GO:0044464,cell part|GO:0005623,cell|GO:0031988,membrane-bounded vesicle|GO:0071944,cell periphery|GO:0005615,extracellular space|GO:0072562,blood microparticle|GO:0005886,plasma membrane|GO:0005576,extracellular region|GO:1903561,extracellular vesic…	GO:0005488,binding|GO:0004866,endopeptidase inhibitor activity|GO:0061135,endopeptidase regulator activity|GO:0061134,peptidase regulator activity|GO:0001849,complement component C1q binding|GO:0001848,complement binding|GO:0005515,protein binding|GO:0030414,peptidase inhibitor activity|GO:0004857,enzyme inhibitor activity|GO:0098772,molecular function regulator|GO:0030234,enzyme regulator activi…	hsa05133,Pertussis|hsa05322,Systemic lupus erythematosus|hsa04610,Complement and coagulation cascades|hsa05150,Staphylococcus aureus infection	http://www.uniprot.org/uniprot/P0C0L4
P99999	2.8097	1.49042	P99999	CYCS	GO:0080090,regulation of primary metabolic process|GO:0019222,regulation of metabolic process|GO:0009167,purine ribonucleoside monophosphate metabolic process|GO:0007165,signal transduction|GO:0009161,ribonucleoside monophosphate metabolic process|GO:1901576,organic substance biosynthetic process|GO:1901362,organic cyclic compound biosynthetic process|GO:0007005,mitochondrion organization|GO:1901…	GO:0044464,cell part|GO:0031970,organelle envelope lumen|GO:1903293,phosphatase complex|GO:0031974,membrane-enclosed lumen|GO:0031975,envelope|GO:0043229,intracellular organelle|GO:0043227,membrane-bounded organelle|GO:0043226,organelle|GO:0005737,cytoplasm|GO:0031090,organelle membrane|GO:0005634,nucleus|GO:0016020,membrane|GO:0044444,cytoplasmic part|GO:0005739,mitochondrion|GO:0005758,mitochon…	GO:0016787,hydrolase activity|GO:0009055,electron carrier activity|GO:0016791,phosphatase activity|GO:0020037,heme binding|GO:0046906,tetrapyrrole binding|GO:0097159,organic cyclic compound binding|GO:0004722,protein serine/threonine phosphatase activity|GO:0004721,phosphoprotein phosphatase activity|GO:0043167,ion binding|GO:0042578,phosphoric ester hydrolase activity|GO:0003824,catalytic activi…	hsa05416,Viral myocarditis|hsa05134,Legionellosis|hsa01100,Metabolic pathways|hsa05152,Tuberculosis|hsa05200,Pathways in cancer|hsa05210,Colorectal cancer|hsa04115,p53 signaling pathway|hsa05164,Influenza A|hsa00920,Sulfur metabolism|hsa05168,Herpes simplex infection|hsa05012,Parkinson's disease|hsa05145,Toxoplasmosis|hsa05014,Amyotrophic lateral sclerosis (ALS)|hsa04210,Apoptosis|hsa05016,Huntin…	http://www.uniprot.org/uniprot/P99999
P59998	2.88845	1.5303	P59998	ARPC4	GO:0006909,phagocytosis|GO:0048584,positive regulation of response to stimulus|GO:0048583,regulation of response to stimulus|GO:0008064,regulation of actin polymerization or depolymerization|GO:0007165,signal transduction|GO:0007166,cell surface receptor signaling pathway|GO:0007167,enzyme linked receptor protein signaling pathway|GO:0030182,neuron differentiation|GO:0007169,transmembrane recepto…	GO:0015629,actin cytoskeleton|GO:0043229,intracellular organelle|GO:0043228,non-membrane-bounded organelle|GO:0043227,membrane-bounded organelle|GO:0043226,organelle|GO:0005856,cytoskeleton|GO:1903561,extracellular vesicle|GO:0031982,vesicle|GO:0031988,membrane-bounded vesicle|GO:0044430,cytoskeletal part|GO:0005737,cytoplasm|GO:0005885,Arp2/3 protein complex|GO:0032991,macromolecular complex|GO:…	GO:0005488,binding|GO:0030674,protein binding, bridging|GO:0005200,structural constituent of cytoskeleton|GO:0008092,cytoskeletal protein binding|GO:0051015,actin filament binding|GO:0005198,structural molecule activity|GO:0003779,actin binding|GO:0044877,macromolecular complex binding|GO:0019899,enzyme binding|GO:0005515,protein binding|GO:0032403,protein complex binding|GO:0060090,binding, brid…	hsa05132,Salmonella infection|hsa05131,Shigellosis|hsa05130,Pathogenic Escherichia coli infection|hsa05100,Bacterial invasion of epithelial cells|hsa04144,Endocytosis|hsa04666,Fc gamma R-mediated phagocytosis|hsa04810,Regulation of actin cytoskeleton	http://www.uniprot.org/uniprot/P59998
Q13642	2.9168	1.54439	Q13642	FHL1	GO:0000086,G2/M transition of mitotic cell cycle|GO:0051049,regulation of transport|GO:0000082,G1/S transition of mitotic cell cycle|GO:0032844,regulation of homeostatic process|GO:0051899,membrane depolarization|GO:0034765,regulation of ion transmembrane transport|GO:0034762,regulation of transmembrane transport|GO:0007517,muscle organ development|GO:0045786,negative regulation of cell cycle|GO:…	GO:0043229,intracellular organelle|GO:0071944,cell periphery|GO:0005924,cell-substrate adherens junction|GO:0005925,focal adhesion|GO:0043227,membrane-bounded organelle|GO:0043226,organelle|GO:0030054,cell junction|GO:0030055,cell-substrate junction|GO:0005737,cytoplasm|GO:0005634,nucleus|GO:0016020,membrane|GO:0070161,anchoring junction|GO:0005912,adherens junction|GO:0005886,plasma membrane|GO:…	GO:0043169,cation binding|GO:0046914,transition metal ion binding|GO:0043167,ion binding|GO:0008270,zinc ion binding|GO:0005515,protein binding|GO:0044325,ion channel binding|GO:0046872,metal ion binding|GO:0005488,binding		http://www.uniprot.org/uniprot/Q13642
P13501	3.03775	1.603	P13501	CCL5	GO:0051046,regulation of secretion|GO:0051049,regulation of transport|GO:0019058,viral life cycle|GO:0043933,macromolecular complex subunit organization|GO:0044281,small molecule metabolic process|GO:0098771,inorganic ion homeostasis|GO:0043200,response to amino acid|GO:0051716,cellular response to stimulus|GO:0043207,response to external biotic stimulus|GO:0000165,MAPK cascade|GO:0030595,leukocy…	GO:0005737,cytoplasm|GO:0005615,extracellular space|GO:0044464,cell part|GO:0005623,cell|GO:0005622,intracellular|GO:0005576,extracellular region|GO:0044424,intracellular part|GO:0044421,extracellular region part	GO:0005126,cytokine receptor binding|GO:0042056,chemoattractant activity|GO:0005125,cytokine activity|GO:0019207,kinase regulator activity|GO:0008009,chemokine activity|GO:0019209,kinase activator activity|GO:0042578,phosphoric ester hydrolase activity|GO:0046983,protein dimerization activity|GO:0008047,enzyme activator activity|GO:0001664,G-protein coupled receptor binding|GO:0098772,molecular f…	hsa05120,Epithelial cell signaling in Helicobacter pylori infection|hsa05323,Rheumatoid arthritis|hsa04620,Toll-like receptor signaling pathway|hsa04621,NOD-like receptor signaling pathway|hsa04623,Cytosolic DNA-sensing pathway|hsa05142,Chagas disease (American trypanosomiasis)|hsa05164,Influenza A|hsa05168,Herpes simplex infection|hsa05020,Prion diseases|hsa04668,TNF signaling pathway|hsa04062,C…	http://www.uniprot.org/uniprot/P13501
P02749	3.4823	1.80004	P02749	APOH	GO:0007599,hemostasis|GO:0019222,regulation of metabolic process|GO:0048585,negative regulation of response to stimulus|GO:0048584,positive regulation of response to stimulus|GO:0048583,regulation of response to stimulus|GO:0050680,negative regulation of epithelial cell proliferation|GO:0031638,zymogen activation|GO:0072359,circulatory system development|GO:0072358,cardiovascular system developme…	GO:0034358,plasma lipoprotein particle|GO:0031012,extracellular matrix|GO:1990777,lipoprotein particle|GO:0043227,membrane-bounded organelle|GO:0043226,organelle|GO:0042627,chylomicron|GO:0070062,extracellular exosome|GO:0031988,membrane-bounded vesicle|GO:0034361,very-low-density lipoprotein particle|GO:0034364,high-density lipoprotein particle|GO:0009986,cell surface|GO:0031982,vesicle|GO:00329…	GO:1901681,sulfur compound binding|GO:0043168,anion binding|GO:0005543,phospholipid binding|GO:0097367,carbohydrate derivative binding|GO:0030234,enzyme regulator activity|GO:0060230,lipoprotein lipase activator activity|GO:0008289,lipid binding|GO:0008201,heparin binding|GO:0005539,glycosaminoglycan binding|GO:0043167,ion binding|GO:0008047,enzyme activator activity|GO:0005515,protein binding|GO…		http://www.uniprot.org/uniprot/P02749
P01871	3.8687	1.95185	P01871	IGHM	GO:0002376,immune system process|GO:0009607,response to biotic stimulus|GO:0043207,response to external biotic stimulus|GO:0019730,antimicrobial humoral response|GO:0019731,antibacterial humoral response|GO:0050896,response to stimulus|GO:0045087,innate immune response|GO:0009617,response to bacterium|GO:0006952,defense response|GO:0006950,response to stress|GO:0098542,defense response to other o…	GO:0071944,cell periphery|GO:0042571,immunoglobulin complex, circulating|GO:0019814,immunoglobulin complex|GO:0043227,membrane-bounded organelle|GO:0043226,organelle|GO:0031224,intrinsic component of membrane|GO:0031982,vesicle|GO:0005615,extracellular space|GO:0016021,integral component of membrane|GO:0016020,membrane|GO:0072562,blood microparticle|GO:0031988,membrane-bounded vesicle|GO:0044425,…	GO:0034987,immunoglobulin receptor binding|GO:1901363,heterocyclic compound binding|GO:0005488,binding|GO:0003676,nucleic acid binding|GO:0003677,DNA binding|GO:0005539,glycosaminoglycan binding|GO:0043168,anion binding|GO:0043169,cation binding|GO:0043566,structure-specific DNA binding|GO:0005543,phospholipid binding|GO:0043167,ion binding|GO:0003697,single-stranded DNA binding|GO:0008289,lipid …		http://www.uniprot.org/uniprot/P01871
P04003	4.29715	2.10338	P04003	C4BPA	GO:0006909,phagocytosis|GO:0080090,regulation of primary metabolic process|GO:0019222,regulation of metabolic process|GO:0051049,regulation of transport|GO:0048585,negative regulation of response to stimulus|GO:0048584,positive regulation of response to stimulus|GO:0048583,regulation of response to stimulus|GO:0002707,negative regulation of lymphocyte mediated immunity|GO:0002706,regulation of ly…	GO:0044217,other organism part|GO:0044216,other organism cell|GO:0044215,other organism|GO:0016020,membrane|GO:0044464,cell part|GO:0005623,cell|GO:0071944,cell periphery|GO:0072562,blood microparticle|GO:0005886,plasma membrane|GO:0005576,extracellular region|GO:0044421,extracellular region part|GO:0005615,extracellular space	GO:0003676,nucleic acid binding|GO:0097159,organic cyclic compound binding|GO:0044822,poly(A) RNA binding|GO:0003723,RNA binding|GO:0005515,protein binding|GO:1901363,heterocyclic compound binding|GO:0005488,binding	hsa05133,Pertussis|hsa04610,Complement and coagulation cascades	http://www.uniprot.org/uniprot/P04003
P02647	41.1154	5.36161	P02647	APOA1	GO:0007599,hemostasis|GO:0051046,regulation of secretion|GO:0051048,negative regulation of secretion|GO:0051049,regulation of transport|GO:0007596,blood coagulation|GO:0044281,small molecule metabolic process|GO:0002701,negative regulation of production of molecular mediator of immune response|GO:0002700,regulation of production of molecular mediator of immune response|GO:0051716,cellular respons…	GO:0005783,endoplasmic reticulum|GO:0044421,extracellular region part|GO:0005886,plasma membrane|GO:0005788,endoplasmic reticulum lumen|GO:0030139,endocytic vesicle|GO:0043229,intracellular organelle|GO:0071944,cell periphery|GO:1990777,lipoprotein particle|GO:0060205,cytoplasmic membrane-bounded vesicle lumen|GO:0005622,intracellular|GO:0043227,membrane-bounded organelle|GO:0043226,organelle|GO:…	GO:0017127,cholesterol transporter activity|GO:0070325,lipoprotein particle receptor binding|GO:0044877,macromolecular complex binding|GO:0008047,enzyme activator activity|GO:0004857,enzyme inhibitor activity|GO:0098772,molecular function regulator|GO:0060228,phosphatidylcholine-sterol O-acyltransferase activator activity|GO:0034191,apolipoprotein A-I receptor binding|GO:0034190,apolipoprotein re…	hsa05143,African trypanosomiasis|hsa03320,PPAR signaling pathway|hsa04975,Fat digestion and absorption|hsa04977,Vitamin digestion and absorption	http://www.uniprot.org/uniprot/P02647

## Sheet: D-A
ID	FoldChange	Log2FoldChange	Uniprot	Genename	Biological Process	Cell Component	Molecular Function	KEGG Pathways	UNIPROT_URL
Q5JSH3	0.2986	-1.74371	Q5JSH3	WDR44		GO:0043229,intracellular organelle|GO:0043227,membrane-bounded organelle|GO:0043226,organelle|GO:0010008,endosome membrane|GO:0005737,cytoplasm|GO:0031090,organelle membrane|GO:0098805,whole membrane|GO:0016020,membrane|GO:0048471,perinuclear region of cytoplasm|GO:0005794,Golgi apparatus|GO:0098588,bounding membrane of organelle|GO:0012505,endomembrane system|GO:0043231,intracellular membrane-bo…			http://www.uniprot.org/uniprot/Q5JSH3
O43633	0.3519	-1.50676	O43633	CHMP2A	GO:0008104,protein localization|GO:0051046,regulation of secretion|GO:0051047,positive regulation of secretion|GO:0051049,regulation of transport|GO:0006900,membrane budding|GO:0061024,membrane organization|GO:0051656,establishment of organelle localization|GO:0071840,cellular component organization or biogenesis|GO:0007017,microtubule-based process|GO:0045786,negative regulation of cell cycle|GO…	GO:0016020,membrane|GO:0043229,intracellular organelle|GO:0030117,membrane coat|GO:0043227,membrane-bounded organelle|GO:0043226,organelle|GO:0010008,endosome membrane|GO:0005737,cytoplasm|GO:0031982,vesicle|GO:0098805,whole membrane|GO:0005770,late endosome|GO:0070062,extracellular exosome|GO:0031988,membrane-bounded vesicle|GO:0031902,late endosome membrane|GO:0048475,coated membrane|GO:0098588…	GO:0043168,anion binding|GO:0043169,cation binding|GO:0043178,alcohol binding|GO:0005543,phospholipid binding|GO:0008289,lipid binding|GO:0050997,quaternary ammonium group binding|GO:0043167,ion binding|GO:0070405,ammonium ion binding|GO:0031210,phosphatidylcholine binding|GO:0036094,small molecule binding|GO:0019904,protein domain specific binding|GO:0005515,protein binding|GO:0005488,binding	hsa04144,Endocytosis	http://www.uniprot.org/uniprot/O43633
O14974	0.35515	-1.4935	O14974	PPP1R12A	GO:0051169,nuclear transport|GO:0019220,regulation of phosphate metabolic process|GO:0080090,regulation of primary metabolic process|GO:0019222,regulation of metabolic process|GO:0000086,G2/M transition of mitotic cell cycle|GO:0051049,regulation of transport|GO:0032386,regulation of intracellular transport|GO:0007165,signal transduction|GO:1901362,organic cyclic compound biosynthetic process|GO:…	GO:0015629,actin cytoskeleton|GO:1903293,phosphatase complex|GO:0031974,membrane-enclosed lumen|GO:0043229,intracellular organelle|GO:0043228,non-membrane-bounded organelle|GO:0005924,cell-substrate adherens junction|GO:0005925,focal adhesion|GO:0043227,membrane-bounded organelle|GO:0043226,organelle|GO:0030054,cell junction|GO:0030055,cell-substrate junction|GO:0005856,cytoskeleton|GO:0031981,nu…	GO:0005515,protein binding|GO:0019900,kinase binding|GO:0030234,enzyme regulator activity|GO:0019899,enzyme binding|GO:0019901,protein kinase binding|GO:0060089,molecular transducer activity|GO:0071889,14-3-3 protein binding|GO:0005488,binding|GO:0004871,signal transducer activity|GO:0004857,enzyme inhibitor activity|GO:0098772,molecular function regulator|GO:0019208,phosphatase regulator activity	hsa04611,Platelet activation|hsa04022,cGMP-PKG signaling pathway|hsa04024,cAMP signaling pathway|hsa05205,Proteoglycans in cancer|hsa04510,Focal adhesion|hsa04270,Vascular smooth muscle contraction|hsa04921,Oxytocin signaling pathway|hsa04810,Regulation of actin cytoskeleton	http://www.uniprot.org/uniprot/O14974
Q96FZ7	0.36235	-1.46454	Q96FZ7	CHMP6	GO:0039702,viral budding via host ESCRT complex|GO:0051046,regulation of secretion|GO:0051049,regulation of transport|GO:0019068,virion assembly|GO:0006900,membrane budding|GO:1903047,mitotic cell cycle process|GO:0050000,chromosome localization|GO:1902589,single-organism organelle organization|GO:0032940,secretion by cell|GO:0022607,cellular component assembly|GO:0022402,cell cycle process|GO:19…	GO:0016020,membrane|GO:0043229,intracellular organelle|GO:0043227,membrane-bounded organelle|GO:0043226,organelle|GO:0010008,endosome membrane|GO:0005737,cytoplasm|GO:0031982,vesicle|GO:0098805,whole membrane|GO:0005770,late endosome|GO:0070062,extracellular exosome|GO:0031988,membrane-bounded vesicle|GO:0031902,late endosome membrane|GO:0098588,bounding membrane of organelle|GO:0012505,endomembr…	GO:0005515,protein binding|GO:0047485,protein N-terminus binding|GO:0005488,binding	hsa04144,Endocytosis	http://www.uniprot.org/uniprot/Q96FZ7
Q15388	0.3808	-1.39289	Q15388	TOMM20	GO:0008104,protein localization|GO:0051649,establishment of localization in cell|GO:0051641,cellular localization|GO:0044699,single-organism process|GO:0044267,cellular protein metabolic process|GO:0071806,protein transmembrane transport|GO:0044260,cellular macromolecule metabolic process|GO:0070727,cellular macromolecule localization|GO:0071840,cellular component organization or biogenesis|GO:00…	GO:0005783,endoplasmic reticulum|GO:0005789,endoplasmic reticulum membrane|GO:0042175,nuclear outer membrane-endoplasmic reticulum membrane network|GO:0043229,intracellular organelle|GO:0043227,membrane-bounded organelle|GO:0043226,organelle|GO:0031224,intrinsic component of membrane|GO:0005737,cytoplasm|GO:0005742,mitochondrial outer membrane translocase complex|GO:0031090,organelle membrane|GO:…	GO:0008565,protein transporter activity|GO:0022891,substrate-specific transmembrane transporter activity|GO:0015450,P-P-bond-hydrolysis-driven protein transmembrane transporter activity|GO:0022884,macromolecule transmembrane transporter activity|GO:0005215,transporter activity|GO:0051082,unfolded protein binding|GO:0008320,protein transmembrane transporter activity|GO:0015399,primary active trans…		http://www.uniprot.org/uniprot/Q15388
Q71U36	0.3946	-1.34154	Q71U36	TUBA1A	GO:0022607,cellular component assembly|GO:0006457,protein folding|GO:0044839,cell cycle G2/M phase transition|GO:0070271,protein complex biogenesis|GO:0000086,G2/M transition of mitotic cell cycle|GO:0006458,'de novo' protein folding|GO:1903047,mitotic cell cycle process|GO:0044770,cell cycle phase transition|GO:0044772,mitotic cell cycle phase transition|GO:0022402,cell cycle process|GO:0034622,…	GO:0035770,ribonucleoprotein granule|GO:0055037,recycling endosome|GO:0043229,intracellular organelle|GO:0043228,non-membrane-bounded organelle|GO:0036464,cytoplasmic ribonucleoprotein granule|GO:0030529,ribonucleoprotein complex|GO:0005874,microtubule|GO:0043226,organelle|GO:0005856,cytoskeleton|GO:0031982,vesicle|GO:0043209,myelin sheath|GO:0043227,membrane-bounded organelle|GO:0005634,nucleus|…	GO:0005200,structural constituent of cytoskeleton|GO:0035639,purine ribonucleoside triphosphate binding|GO:0005488,binding|GO:0005198,structural molecule activity|GO:1901363,heterocyclic compound binding|GO:1901265,nucleoside phosphate binding|GO:0001882,nucleoside binding|GO:0043168,anion binding|GO:0016462,pyrophosphatase activity|GO:0000166,nucleotide binding|GO:0032561,guanyl ribonucleotide b…	hsa05130,Pathogenic Escherichia coli infection|hsa04145,Phagosome|hsa04540,Gap junction	http://www.uniprot.org/uniprot/Q71U36
Q8NG06	0.41985	-1.25205	Q8NG06	TRIM58	GO:0071704,organic substance metabolic process|GO:0044267,cellular protein metabolic process|GO:0044238,primary metabolic process|GO:0044260,cellular macromolecule metabolic process|GO:0032446,protein modification by small protein conjugation|GO:0019538,protein metabolic process|GO:0009987,cellular process|GO:0070647,protein modification by small protein conjugation or removal|GO:0006464,cellular…	GO:0044464,cell part|GO:0005623,cell|GO:0005622,intracellular	GO:0043169,cation binding|GO:0046914,transition metal ion binding|GO:0043167,ion binding|GO:0003824,catalytic activity|GO:0008270,zinc ion binding|GO:0046872,metal ion binding|GO:0016874,ligase activity|GO:0005488,binding		http://www.uniprot.org/uniprot/Q8NG06
O75410	0.44805	-1.15827	O75410	TACC1	GO:0021537,telencephalon development|GO:0044707,single-multicellular organism process|GO:0030154,cell differentiation|GO:0060322,head development|GO:0000226,microtubule cytoskeleton organization|GO:0032886,regulation of microtubule-based process|GO:0007275,multicellular organismal development|GO:0007049,cell cycle|GO:0007417,central nervous system development|GO:0048869,cellular developmental pro…	GO:0005856,cytoskeleton|GO:0005737,cytoplasm|GO:0045111,intermediate filament cytoskeleton|GO:0015630,microtubule cytoskeleton|GO:0043228,non-membrane-bounded organelle|GO:0043231,intracellular membrane-bounded organelle|GO:0043232,intracellular non-membrane-bounded organelle|GO:0005634,nucleus|GO:0044464,cell part|GO:0005623,cell|GO:0005815,microtubule organizing center|GO:0044446,intracellular …	GO:0019904,protein domain specific binding|GO:0005515,protein binding|GO:0005488,binding		http://www.uniprot.org/uniprot/O75410
O00483	0.4643	-1.10687	O00483	NDUFA4	GO:0051234,establishment of localization|GO:1902600,hydrogen ion transmembrane transport|GO:0009141,nucleoside triphosphate metabolic process|GO:0009144,purine nucleoside triphosphate metabolic process|GO:0009167,purine ribonucleoside monophosphate metabolic process|GO:0034641,cellular nitrogen compound metabolic process|GO:0006807,nitrogen compound metabolic process|GO:0044281,small molecule met…	GO:0044464,cell part|GO:0031090,organelle membrane|GO:1990204,oxidoreductase complex|GO:0043229,intracellular organelle|GO:0070069,cytochrome complex|GO:0031988,membrane-bounded vesicle|GO:0043227,membrane-bounded organelle|GO:0043226,organelle|GO:0005737,cytoplasm|GO:0005751,mitochondrial respiratory chain complex IV|GO:0031982,vesicle|GO:0098796,membrane protein complex|GO:0031975,envelope|GO:0…	GO:0044877,macromolecular complex binding|GO:0005488,binding|GO:0003954,NADH dehydrogenase activity|GO:0016491,oxidoreductase activity|GO:0015077,monovalent inorganic cation transmembrane transporter activity|GO:0050136,NADH dehydrogenase (quinone) activity|GO:0008137,NADH dehydrogenase (ubiquinone) activity|GO:0032403,protein complex binding|GO:0015002,heme-copper terminal oxidase activity|GO:00…	hsa00190,Oxidative phosphorylation|hsa01100,Metabolic pathways|hsa04932,Non-alcoholic fatty liver disease (NAFLD)|hsa05016,Huntington's disease|hsa05010,Alzheimer's disease|hsa05012,Parkinson's disease	http://www.uniprot.org/uniprot/O00483
Q9BQE3	0.4676	-1.09665	Q9BQE3	TUBA1C	GO:0022607,cellular component assembly|GO:0006457,protein folding|GO:0070271,protein complex biogenesis|GO:0043933,macromolecular complex subunit organization|GO:0006458,'de novo' protein folding|GO:0051301,cell division|GO:0034622,cellular macromolecular complex assembly|GO:0044699,single-organism process|GO:0044267,cellular protein metabolic process|GO:0071822,protein complex subunit organizati…	GO:0043229,intracellular organelle|GO:0043228,non-membrane-bounded organelle|GO:0043227,membrane-bounded organelle|GO:0043226,organelle|GO:0005856,cytoskeleton|GO:0031982,vesicle|GO:0005874,microtubule|GO:0005634,nucleus|GO:0044430,cytoskeletal part|GO:0005737,cytoplasm|GO:0015630,microtubule cytoskeleton|GO:0005881,cytoplasmic microtubule|GO:0043234,protein complex|GO:0032991,macromolecular comp…	GO:0005200,structural constituent of cytoskeleton|GO:0035639,purine ribonucleoside triphosphate binding|GO:0005488,binding|GO:0005198,structural molecule activity|GO:1901363,heterocyclic compound binding|GO:1901265,nucleoside phosphate binding|GO:0001882,nucleoside binding|GO:0043168,anion binding|GO:0016462,pyrophosphatase activity|GO:0000166,nucleotide binding|GO:0032561,guanyl ribonucleotide b…	hsa05130,Pathogenic Escherichia coli infection|hsa04145,Phagosome|hsa04540,Gap junction	http://www.uniprot.org/uniprot/Q9BQE3
P04264	0.48985	-1.02959	P04264	KRT1	GO:0007599,hemostasis|GO:0060249,anatomical structure homeostasis|GO:0048585,negative regulation of response to stimulus|GO:0048584,positive regulation of response to stimulus|GO:0048583,regulation of response to stimulus|GO:0031348,negative regulation of defense response|GO:0072359,circulatory system development|GO:0072358,cardiovascular system development|GO:0061436,establishment of skin barrie…	GO:0045095,keratin filament|GO:0031012,extracellular matrix|GO:0043229,intracellular organelle|GO:0043228,non-membrane-bounded organelle|GO:0043227,membrane-bounded organelle|GO:0043226,organelle|GO:0005856,cytoskeleton|GO:0045111,intermediate filament cytoskeleton|GO:0070062,extracellular exosome|GO:0005615,extracellular space|GO:0005634,nucleus|GO:0016020,membrane|GO:0072562,blood microparticle…	GO:0030246,carbohydrate binding|GO:0005198,structural molecule activity|GO:0060089,molecular transducer activity|GO:0005488,binding|GO:0005515,protein binding|GO:0004872,receptor activity		http://www.uniprot.org/uniprot/P04264
O43182	0.4918	-1.02386	O43182	ARHGAP6	GO:0019222,regulation of metabolic process|GO:0048584,positive regulation of response to stimulus|GO:0048583,regulation of response to stimulus|GO:0007160,cell-matrix adhesion|GO:0007162,negative regulation of cell adhesion|GO:0007165,signal transduction|GO:0051893,regulation of focal adhesion assembly|GO:0051895,negative regulation of focal adhesion assembly|GO:0032231,regulation of actin filame…	GO:0005856,cytoskeleton|GO:0043234,protein complex|GO:0043228,non-membrane-bounded organelle|GO:0015629,actin cytoskeleton|GO:0043232,intracellular non-membrane-bounded organelle|GO:0005829,cytosol|GO:0044464,cell part|GO:0044444,cytoplasmic part|GO:0005623,cell|GO:0005737,cytoplasm|GO:0044446,intracellular organelle part|GO:0043229,intracellular organelle|GO:0044430,cytoskeletal part|GO:0005884,…	GO:0005070,SH3/SH2 adaptor activity|GO:0030674,protein binding, bridging|GO:0035591,signaling adaptor activity|GO:0030234,enzyme regulator activity|GO:0005096,GTPase activator activity|GO:0017124,SH3 domain binding|GO:0019899,enzyme binding|GO:0030695,GTPase regulator activity|GO:0043274,phospholipase binding|GO:0008047,enzyme activator activity|GO:0005515,protein binding|GO:0005488,binding|GO:00…		http://www.uniprot.org/uniprot/O43182
O00151	0.49205	-1.02312	O00151	PDLIM1	GO:0009628,response to abiotic stimulus|GO:0080090,regulation of primary metabolic process|GO:0019222,regulation of metabolic process|GO:0031326,regulation of cellular biosynthetic process|GO:0031323,regulation of cellular metabolic process|GO:0090304,nucleic acid metabolic process|GO:0044249,cellular biosynthetic process|GO:0034641,cellular nitrogen compound metabolic process|GO:0006807,nitrogen…	GO:0005856,cytoskeleton|GO:0043234,protein complex|GO:0005622,intracellular|GO:0032991,macromolecular complex|GO:0043232,intracellular non-membrane-bounded organelle|GO:0070161,anchoring junction|GO:0044464,cell part|GO:0005623,cell|GO:0005737,cytoplasm|GO:0043229,intracellular organelle|GO:0043228,non-membrane-bounded organelle|GO:0005912,adherens junction|GO:0005667,transcription factor complex…	GO:0043169,cation binding|GO:0046914,transition metal ion binding|GO:0003713,transcription coactivator activity|GO:0003712,transcription cofactor activity|GO:0043167,ion binding|GO:0005488,binding|GO:0000989,transcription factor activity, transcription factor binding|GO:0000988,transcription factor activity, protein binding|GO:0046872,metal ion binding|GO:0008270,zinc ion binding		http://www.uniprot.org/uniprot/O00151
Q05682	0.49735	-1.00767	Q05682	CALD1	GO:0032501,multicellular organismal process|GO:0006936,muscle contraction|GO:0044707,single-multicellular organism process|GO:0009987,cellular process|GO:0006928,movement of cell or subcellular component|GO:0003012,muscle system process|GO:0044763,single-organism cellular process|GO:0044699,single-organism process|GO:0003008,system process	GO:0015629,actin cytoskeleton|GO:0030016,myofibril|GO:0043229,intracellular organelle|GO:0043228,non-membrane-bounded organelle|GO:0005622,intracellular|GO:0043226,organelle|GO:0005856,cytoskeleton|GO:0016020,membrane|GO:0044430,cytoskeletal part|GO:0005737,cytoplasm|GO:0030478,actin cap|GO:0044424,intracellular part|GO:0005938,cell cortex|GO:0005886,plasma membrane|GO:0043232,intracellular non-m…	GO:0008092,cytoskeletal protein binding|GO:0017022,myosin binding|GO:0003779,actin binding|GO:0005516,calmodulin binding|GO:0005515,protein binding|GO:0005523,tropomyosin binding|GO:0005488,binding	hsa04270,Vascular smooth muscle contraction	http://www.uniprot.org/uniprot/Q05682
B2RUZ4	0.50905	-0.974121	B2RUZ4	SMIM1		GO:0043230,extracellular organelle|GO:0031982,vesicle|GO:0044421,extracellular region part|GO:0043227,membrane-bounded organelle|GO:0016021,integral component of membrane|GO:0016020,membrane|GO:0031988,membrane-bounded vesicle|GO:0005576,extracellular region|GO:0044425,membrane part|GO:1903561,extracellular vesicle|GO:0065010,extracellular membrane-bounded organelle|GO:0043226,organelle|GO:003122…			http://www.uniprot.org/uniprot/B2RUZ4
Q96T51	0.50985	-0.971855	Q96T51	RUFY1	GO:0008104,protein localization|GO:0051049,regulation of transport|GO:0051128,regulation of cellular component organization|GO:0050789,regulation of biological process|GO:0071840,cellular component organization or biogenesis|GO:0032879,regulation of localization|GO:0016043,cellular component organization|GO:0065007,biological regulation|GO:0071702,organic substance transport|GO:0033036,macromolec…	GO:0043229,intracellular organelle|GO:0043227,membrane-bounded organelle|GO:0043226,organelle|GO:0010008,endosome membrane|GO:0005737,cytoplasm|GO:0031090,organelle membrane|GO:0005634,nucleus|GO:0016020,membrane|GO:0031901,early endosome membrane|GO:0098588,bounding membrane of organelle|GO:0012505,endomembrane system|GO:0043231,intracellular membrane-bounded organelle|GO:0044464,cell part|GO:00…	GO:0008565,protein transporter activity|GO:0043169,cation binding|GO:0022892,substrate-specific transporter activity|GO:0046914,transition metal ion binding|GO:0005215,transporter activity|GO:0008289,lipid binding|GO:0043167,ion binding|GO:0008270,zinc ion binding|GO:0005515,protein binding|GO:0046872,metal ion binding|GO:0005488,binding	hsa04144,Endocytosis	http://www.uniprot.org/uniprot/Q96T51
Q9UNH7	0.5113	-0.967758	Q9UNH7	SNX6	GO:0043549,regulation of kinase activity|GO:0019220,regulation of phosphate metabolic process|GO:0080090,regulation of primary metabolic process|GO:0019222,regulation of metabolic process|GO:0051049,regulation of transport|GO:0048585,negative regulation of response to stimulus|GO:0048583,regulation of response to stimulus|GO:0006820,anion transport|GO:0008104,protein localization|GO:0002703,regul…	GO:0019898,extrinsic component of membrane|GO:0043229,intracellular organelle|GO:0043227,membrane-bounded organelle|GO:0043226,organelle|GO:0010008,endosome membrane|GO:0005737,cytoplasm|GO:0044446,intracellular organelle part|GO:0031982,vesicle|GO:0016023,cytoplasmic membrane-bounded vesicle|GO:0031410,cytoplasmic vesicle|GO:0005634,nucleus|GO:0016020,membrane|GO:0031988,membrane-bounded vesicle…	GO:0043168,anion binding|GO:0034452,dynactin binding|GO:0008092,cytoskeletal protein binding|GO:0035091,phosphatidylinositol binding|GO:0005543,phospholipid binding|GO:0008289,lipid binding|GO:0043167,ion binding|GO:0005488,binding|GO:0005515,protein binding|GO:0046983,protein dimerization activity|GO:0042802,identical protein binding|GO:0042803,protein homodimerization activity	hsa04144,Endocytosis	http://www.uniprot.org/uniprot/Q9UNH7
P35527	0.51455	-0.958617	P35527	KRT9	GO:0043933,macromolecular complex subunit organization|GO:0019953,sexual reproduction|GO:0008544,epidermis development|GO:0007275,multicellular organismal development|GO:0044699,single-organism process|GO:0000003,reproduction|GO:0071822,protein complex subunit organization|GO:0071840,cellular component organization or biogenesis|GO:0016043,cellular component organization|GO:0048513,organ developm…	GO:0043229,intracellular organelle|GO:0043228,non-membrane-bounded organelle|GO:0043227,membrane-bounded organelle|GO:0043226,organelle|GO:0005856,cytoskeleton|GO:0045111,intermediate filament cytoskeleton|GO:0031982,vesicle|GO:0005615,extracellular space|GO:0005634,nucleus|GO:0016020,membrane|GO:0031988,membrane-bounded vesicle|GO:0044430,cytoskeletal part|GO:0005882,intermediate filament|GO:003…	GO:0005200,structural constituent of cytoskeleton|GO:0005198,structural molecule activity		http://www.uniprot.org/uniprot/P35527
Q7LDG7	0.51485	-0.957776	Q7LDG7	RASGRP2	GO:0007599,hemostasis|GO:0009893,positive regulation of metabolic process|GO:0019222,regulation of metabolic process|GO:0007596,blood coagulation|GO:0071241,cellular response to inorganic substance|GO:0051128,regulation of cellular component organization|GO:0023052,signaling|GO:0007165,signal transduction|GO:0070887,cellular response to chemical stimulus|GO:0042221,response to chemical|GO:0071840…	GO:0098590,plasma membrane region|GO:0071944,cell periphery|GO:0045202,synapse|GO:0030054,cell junction|GO:0005737,cytoplasm|GO:0001726,ruffle|GO:0098805,whole membrane|GO:0016020,membrane|GO:0097458,neuron part|GO:0043005,neuron projection|GO:0044459,plasma membrane part|GO:0031256,leading edge membrane|GO:0098589,membrane region|GO:0031253,cell projection membrane|GO:0031252,cell leading edge|G…	GO:0043169,cation binding|GO:0098772,molecular function regulator|GO:0019992,diacylglycerol binding|GO:0005085,guanyl-nucleotide exchange factor activity|GO:0008289,lipid binding|GO:0043167,ion binding|GO:0005509,calcium ion binding|GO:0046872,metal ion binding|GO:0005488,binding	hsa04611,Platelet activation|hsa05200,Pathways in cancer|hsa04015,Rap1 signaling pathway|hsa04014,Ras signaling pathway|hsa04010,MAPK signaling pathway|hsa04062,Chemokine signaling pathway	http://www.uniprot.org/uniprot/Q7LDG7
O43561	0.53045	-0.914711	O43561	LAT	GO:0006887,exocytosis|GO:0019220,regulation of phosphate metabolic process|GO:0080090,regulation of primary metabolic process|GO:0019222,regulation of metabolic process|GO:0034110,regulation of homotypic cell-cell adhesion|GO:0048584,positive regulation of response to stimulus|GO:0048583,regulation of response to stimulus|GO:0007165,signal transduction|GO:0007166,cell surface receptor signaling p…	GO:0000323,lytic vacuole|GO:0043229,intracellular organelle|GO:0071944,cell periphery|GO:0043227,membrane-bounded organelle|GO:0043226,organelle|GO:0031224,intrinsic component of membrane|GO:0008180,COP9 signalosome|GO:0005737,cytoplasm|GO:0044446,intracellular organelle part|GO:0005773,vacuole|GO:0005634,nucleus|GO:0016020,membrane|GO:0042629,mast cell granule|GO:0098805,whole membrane|GO:003005…	GO:0005070,SH3/SH2 adaptor activity|GO:0030674,protein binding, bridging|GO:0019900,kinase binding|GO:0019899,enzyme binding|GO:0019901,protein kinase binding|GO:0035591,signaling adaptor activity|GO:0005488,binding|GO:0005515,protein binding|GO:0060090,binding, bridging	hsa04650,Natural killer cell mediated cytotoxicity|hsa04660,T cell receptor signaling pathway|hsa04015,Rap1 signaling pathway|hsa04014,Ras signaling pathway|hsa04664,Fc epsilon RI signaling pathway|hsa04666,Fc gamma R-mediated phagocytosis|hsa04064,NF-kappa B signaling pathway	http://www.uniprot.org/uniprot/O43561
Q5M775	0.53075	-0.913896	Q5M775	SPECC1		GO:0043231,intracellular membrane-bounded organelle|GO:0005634,nucleus|GO:0044464,cell part|GO:0005623,cell|GO:0005622,intracellular|GO:0043229,intracellular organelle|GO:0044424,intracellular part|GO:0043227,membrane-bounded organelle|GO:0043226,organelle			http://www.uniprot.org/uniprot/Q5M775
O75190	0.5313	-0.912401	O75190	DNAJB6	GO:0090084,negative regulation of inclusion body assembly|GO:0090083,regulation of inclusion body assembly|GO:0080090,regulation of primary metabolic process|GO:0019222,regulation of metabolic process|GO:0060710,chorio-allantoic fusion|GO:0060711,labyrinthine layer development|GO:0034605,cellular response to heat|GO:0060713,labyrinthine layer morphogenesis|GO:0048583,regulation of response to sti…	GO:0031974,membrane-enclosed lumen|GO:0030016,myofibril|GO:0030017,sarcomere|GO:0043229,intracellular organelle|GO:0043228,non-membrane-bounded organelle|GO:0043227,membrane-bounded organelle|GO:0043226,organelle|GO:0030018,Z disc|GO:0005737,cytoplasm|GO:0031981,nuclear lumen|GO:0005634,nucleus|GO:0016020,membrane|GO:0031674,I band|GO:0005654,nucleoplasm|GO:0048471,perinuclear region of cytoplasm…	GO:0005488,binding|GO:0003676,nucleic acid binding|GO:0005515,protein binding|GO:0031072,heat shock protein binding|GO:0030234,enzyme regulator activity|GO:0051087,chaperone binding|GO:0097159,organic cyclic compound binding|GO:0051082,unfolded protein binding|GO:0008047,enzyme activator activity|GO:0060590,ATPase regulator activity|GO:0003677,DNA binding|GO:0098772,molecular function regulator|G…		http://www.uniprot.org/uniprot/O75190
P69905	0.5373	-0.8962	P69905	HBA1	GO:0015701,bicarbonate transport|GO:0022607,cellular component assembly|GO:0070271,protein complex biogenesis|GO:0043933,macromolecular complex subunit organization|GO:0000302,response to reactive oxygen species|GO:0044248,cellular catabolic process|GO:0006820,anion transport|GO:0042744,hydrogen peroxide catabolic process|GO:0042743,hydrogen peroxide metabolic process|GO:0044281,small molecule me…	GO:0022626,cytosolic ribosome|GO:0022627,cytosolic small ribosomal subunit|GO:0031974,membrane-enclosed lumen|GO:0030139,endocytic vesicle|GO:0043229,intracellular organelle|GO:0043228,non-membrane-bounded organelle|GO:0060205,cytoplasmic membrane-bounded vesicle lumen|GO:0005833,hemoglobin complex|GO:0043227,membrane-bounded organelle|GO:0043226,organelle|GO:0015935,small ribosomal subunit|GO:00…	GO:0005344,oxygen transporter activity|GO:0005488,binding|GO:1901363,heterocyclic compound binding|GO:0016491,oxidoreductase activity|GO:0043169,cation binding|GO:0016684,oxidoreductase activity, acting on peroxide as acceptor|GO:0046914,transition metal ion binding|GO:0043167,ion binding|GO:0005506,iron ion binding|GO:0046872,metal ion binding|GO:0020037,heme binding|GO:0005215,transporter activ…	hsa05143,African trypanosomiasis|hsa05144,Malaria	http://www.uniprot.org/uniprot/P69905
Q8WUD1	0.54115	-0.8859	Q8WUD1	RAB2B	GO:0045921,positive regulation of exocytosis|GO:0051234,establishment of localization|GO:0060341,regulation of cellular localization|GO:0051047,positive regulation of secretion|GO:0051049,regulation of transport|GO:0032940,secretion by cell|GO:0008104,protein localization|GO:0023052,signaling|GO:1903530,regulation of secretion by cell|GO:1903532,positive regulation of secretion by cell|GO:0035556…	GO:0005783,endoplasmic reticulum|GO:0005789,endoplasmic reticulum membrane|GO:0042175,nuclear outer membrane-endoplasmic reticulum membrane network|GO:0043229,intracellular organelle|GO:0071944,cell periphery|GO:0005622,intracellular|GO:0043227,membrane-bounded organelle|GO:0043226,organelle|GO:0005737,cytoplasm|GO:0031982,vesicle|GO:0016020,membrane|GO:0031988,membrane-bounded vesicle|GO:0044432…	GO:0035639,purine ribonucleoside triphosphate binding|GO:0005488,binding|GO:0043167,ion binding|GO:1901363,heterocyclic compound binding|GO:1901265,nucleoside phosphate binding|GO:0001882,nucleoside binding|GO:0043168,anion binding|GO:0016462,pyrophosphatase activity|GO:0000166,nucleotide binding|GO:0032561,guanyl ribonucleotide binding|GO:0001883,purine nucleoside binding|GO:0032549,ribonucleosi…		http://www.uniprot.org/uniprot/Q8WUD1
Q00577	0.54695	-0.870519	Q00577	PURA	GO:0080090,regulation of primary metabolic process|GO:0019222,regulation of metabolic process|GO:1901362,organic cyclic compound biosynthetic process|GO:0071840,cellular component organization or biogenesis|GO:0010605,negative regulation of macromolecule metabolic process|GO:0010608,posttranscriptional regulation of gene expression|GO:0043043,peptide biosynthetic process|GO:0006260,DNA replicatio…	GO:0031974,membrane-enclosed lumen|GO:0000781,chromosome, telomeric region|GO:0043229,intracellular organelle|GO:0005662,DNA replication factor A complex|GO:0000784,nuclear chromosome, telomeric region|GO:0000228,nuclear chromosome|GO:0043227,membrane-bounded organelle|GO:0043226,organelle|GO:0005737,cytoplasm|GO:0031981,nuclear lumen|GO:0097458,neuron part|GO:0005634,nucleus|GO:0044454,nuclear c…	GO:0005488,binding|GO:0003676,nucleic acid binding|GO:0003677,DNA binding|GO:1901363,heterocyclic compound binding|GO:0043565,sequence-specific DNA binding|GO:0043566,structure-specific DNA binding|GO:0000900,translation repressor activity, nucleic acid binding|GO:0008134,transcription factor binding|GO:0003690,double-stranded DNA binding|GO:0003691,double-stranded telomeric DNA binding|GO:000369…		http://www.uniprot.org/uniprot/Q00577
Q9UNF0	0.5486	-0.866173	Q9UNF0	PACSIN2	GO:0022607,cellular component assembly|GO:0051234,establishment of localization|GO:0030030,cell projection organization|GO:0051049,regulation of transport|GO:0072584,caveolin-mediated endocytosis|GO:0044091,membrane biogenesis|GO:0051129,negative regulation of cellular component organization|GO:0051128,regulation of cellular component organization|GO:0061024,membrane organization|GO:0007009,plasm…	GO:0005911,cell-cell junction|GO:0044463,cell projection part|GO:0055038,recycling endosome membrane|GO:0098590,plasma membrane region|GO:0044421,extracellular region part|GO:0055037,recycling endosome|GO:0031974,membrane-enclosed lumen|GO:0019898,extrinsic component of membrane|GO:0005901,caveola|GO:0043229,intracellular organelle|GO:0043228,non-membrane-bounded organelle|GO:0005924,cell-substra…	GO:0043168,anion binding|GO:0008092,cytoskeletal protein binding|GO:0005215,transporter activity|GO:0070300,phosphatidic acid binding|GO:0005543,phospholipid binding|GO:0008289,lipid binding|GO:0043167,ion binding|GO:0005488,binding|GO:0005515,protein binding|GO:0042802,identical protein binding		http://www.uniprot.org/uniprot/Q9UNF0
P04792	0.54965	-0.863415	P04792	HSPB1	GO:2001234,negative regulation of apoptotic signaling pathway|GO:1901566,organonitrogen compound biosynthetic process|GO:0051348,negative regulation of transferase activity|GO:0019220,regulation of phosphate metabolic process|GO:0080090,regulation of primary metabolic process|GO:0019222,regulation of metabolic process|GO:2001233,regulation of apoptotic signaling pathway|GO:0048585,negative regula…	GO:0030016,myofibril|GO:0030017,sarcomere|GO:0043229,intracellular organelle|GO:0043228,non-membrane-bounded organelle|GO:0005924,cell-substrate adherens junction|GO:0005925,focal adhesion|GO:0043227,membrane-bounded organelle|GO:0043226,organelle|GO:0030018,Z disc|GO:0030055,cell-substrate junction|GO:0005856,cytoskeleton|GO:0005819,spindle|GO:0031982,vesicle|GO:0005615,extracellular space|GO:00…	GO:0019207,kinase regulator activity|GO:0005080,protein kinase C binding|GO:0019899,enzyme binding|GO:0005488,binding|GO:0003676,nucleic acid binding|GO:0004857,enzyme inhibitor activity|GO:0098772,molecular function regulator|GO:1901363,heterocyclic compound binding|GO:0008426,protein kinase C inhibitor activity|GO:0030234,enzyme regulator activity|GO:0042802,identical protein binding|GO:0019210…	hsa05146,Amoebiasis|hsa05169,Epstein-Barr virus infection|hsa04370,VEGF signaling pathway|hsa04010,MAPK signaling pathway	http://www.uniprot.org/uniprot/P04792
Q9H0R4	0.5538	-0.852563	Q9H0R4	HDHD2		GO:0043230,extracellular organelle|GO:0031982,vesicle|GO:0044421,extracellular region part|GO:0043227,membrane-bounded organelle|GO:0031988,membrane-bounded vesicle|GO:0005576,extracellular region|GO:1903561,extracellular vesicle|GO:0065010,extracellular membrane-bounded organelle|GO:0043226,organelle|GO:0070062,extracellular exosome	GO:0043169,cation binding|GO:0019899,enzyme binding|GO:0043167,ion binding|GO:0005488,binding|GO:0005515,protein binding|GO:0046872,metal ion binding		http://www.uniprot.org/uniprot/Q9H0R4
Q27J81	0.55465	-0.85035	Q27J81	INF2	GO:0033043,regulation of organelle organization|GO:0000266,mitochondrial fission|GO:0030036,actin cytoskeleton organization|GO:0051128,regulation of cellular component organization|GO:0010821,regulation of mitochondrion organization|GO:0071840,cellular component organization or biogenesis|GO:0009653,anatomical structure morphogenesis|GO:0050789,regulation of biological process|GO:0044699,single-o…	GO:0005737,cytoplasm|GO:0005783,endoplasmic reticulum|GO:0005634,nucleus|GO:0044464,cell part|GO:0044444,cytoplasmic part|GO:0005623,cell|GO:0005622,intracellular|GO:0043229,intracellular organelle|GO:0012505,endomembrane system|GO:0044424,intracellular part|GO:0048471,perinuclear region of cytoplasm|GO:0043227,membrane-bounded organelle|GO:0043226,organelle|GO:0043231,intracellular membrane-boun…	GO:0008092,cytoskeletal protein binding|GO:0017048,Rho GTPase binding|GO:0017016,Ras GTPase binding|GO:0003779,actin binding|GO:0031267,small GTPase binding|GO:0051020,GTPase binding|GO:0019899,enzyme binding|GO:0005515,protein binding|GO:0005488,binding		http://www.uniprot.org/uniprot/Q27J81
P13224	0.5552	-0.848921	P13224	GP1BB	GO:0007599,hemostasis|GO:0007597,blood coagulation, intrinsic pathway|GO:0007596,blood coagulation|GO:0023052,signaling|GO:0007165,signal transduction|GO:0007166,cell surface receptor signaling pathway|GO:0050789,regulation of biological process|GO:0044699,single-organism process|GO:0044710,single-organism metabolic process|GO:0072376,protein activation cascade|GO:0072378,blood coagulation, fibri…	GO:0031226,intrinsic component of plasma membrane|GO:0016021,integral component of membrane|GO:0016020,membrane|GO:0044464,cell part|GO:0005623,cell|GO:0071944,cell periphery|GO:0005887,integral component of plasma membrane|GO:0005886,plasma membrane|GO:0044425,membrane part|GO:0044459,plasma membrane part|GO:0031224,intrinsic component of membrane	GO:0038023,signaling receptor activity|GO:0005515,protein binding|GO:0060089,molecular transducer activity|GO:0004888,transmembrane signaling receptor activity|GO:0004872,receptor activity|GO:0004871,signal transducer activity|GO:0005488,binding	hsa04611,Platelet activation|hsa04512,ECM-receptor interaction|hsa04640,Hematopoietic cell lineage	http://www.uniprot.org/uniprot/P13224
P02649	0.55845	-0.8405	P02649	APOE	GO:0051043,regulation of membrane protein ectodomain proteolysis|GO:0051044,positive regulation of membrane protein ectodomain proteolysis|GO:0051049,regulation of transport|GO:0001667,ameboidal-type cell migration|GO:0007596,blood coagulation|GO:0016358,dendrite development|GO:0009165,nucleotide biosynthetic process|GO:0044281,small molecule metabolic process|GO:0044282,small molecule catabolic …	GO:0042995,cell projection|GO:0005783,endoplasmic reticulum|GO:0034361,very-low-density lipoprotein particle|GO:0044421,extracellular region part|GO:0031974,membrane-enclosed lumen|GO:0031012,extracellular matrix|GO:0030139,endocytic vesicle|GO:0043229,intracellular organelle|GO:0071944,cell periphery|GO:1990777,lipoprotein particle|GO:0060205,cytoplasmic membrane-bounded vesicle lumen|GO:0005622…	GO:0017127,cholesterol transporter activity|GO:0070325,lipoprotein particle receptor binding|GO:0044877,macromolecular complex binding|GO:0008047,enzyme activator activity|GO:0098772,molecular function regulator|GO:0060228,phosphatidylcholine-sterol O-acyltransferase activator activity|GO:1901681,sulfur compound binding|GO:0043169,cation binding|GO:0046911,metal chelating activity|GO:0001540,beta…	hsa05010,Alzheimer's disease	http://www.uniprot.org/uniprot/P02649
O95721	0.5598	-0.837017	O95721	SNAP29	GO:0022607,cellular component assembly|GO:0008152,metabolic process|GO:0070271,protein complex biogenesis|GO:0043933,macromolecular complex subunit organization|GO:0044237,cellular metabolic process|GO:0006810,transport|GO:0006906,vesicle fusion|GO:0097480,establishment of synaptic vesicle localization|GO:0006903,vesicle targeting|GO:0061025,membrane fusion|GO:0061024,membrane organization|GO:003…	GO:0043229,intracellular organelle|GO:0043228,non-membrane-bounded organelle|GO:0031201,SNARE complex|GO:0005815,microtubule organizing center|GO:0043227,membrane-bounded organelle|GO:0043226,organelle|GO:0005856,cytoskeleton|GO:0031982,vesicle|GO:0005773,vacuole|GO:0031410,cytoplasmic vesicle|GO:0098805,whole membrane|GO:0016020,membrane|GO:0005776,autophagosome|GO:0005774,vacuolar membrane|GO:0…	GO:0000149,SNARE binding|GO:0019905,syntaxin binding|GO:0005488,binding|GO:0005515,protein binding|GO:0005484,SNAP receptor activity	hsa04130,SNARE interactions in vesicular transport	http://www.uniprot.org/uniprot/O95721
P05166	0.55985	-0.836888	P05166	PCCB	GO:0034440,lipid oxidation|GO:0006631,fatty acid metabolic process|GO:0006635,fatty acid beta-oxidation|GO:0019752,carboxylic acid metabolic process|GO:0044248,cellular catabolic process|GO:0009062,fatty acid catabolic process|GO:0034641,cellular nitrogen compound metabolic process|GO:0006807,nitrogen compound metabolic process|GO:0044281,small molecule metabolic process|GO:0044282,small molecule…	GO:0005737,cytoplasm|GO:0043231,intracellular membrane-bounded organelle|GO:0043233,organelle lumen|GO:0005829,cytosol|GO:0044464,cell part|GO:0044444,cytoplasmic part|GO:0031974,membrane-enclosed lumen|GO:0005622,intracellular|GO:0044446,intracellular organelle part|GO:0070013,intracellular organelle lumen|GO:0043229,intracellular organelle|GO:0005739,mitochondrion|GO:0044429,mitochondrial part|…	GO:0035639,purine ribonucleoside triphosphate binding|GO:0016885,ligase activity, forming carbon-carbon bonds|GO:0005488,binding|GO:0043167,ion binding|GO:1901363,heterocyclic compound binding|GO:1901265,nucleoside phosphate binding|GO:0001882,nucleoside binding|GO:0043168,anion binding|GO:0004658,propionyl-CoA carboxylase activity|GO:0000166,nucleotide binding|GO:0001883,purine nucleoside bindin…	hsa01100,Metabolic pathways|hsa00630,Glyoxylate and dicarboxylate metabolism|hsa01200,Carbon metabolism|hsa00280,Valine, leucine and isoleucine degradation|hsa01130,Biosynthesis of antibiotics|hsa00640,Propanoate metabolism	http://www.uniprot.org/uniprot/P05166
P40197	0.56495	-0.823805	P40197	GP5	GO:0032102,negative regulation of response to external stimulus|GO:0008152,metabolic process|GO:0032101,regulation of response to external stimulus|GO:0050865,regulation of cell activation|GO:0048585,negative regulation of response to stimulus|GO:0050866,negative regulation of cell activation|GO:0048583,regulation of response to stimulus|GO:0009611,response to wounding|GO:0007160,cell-matrix adhe…	GO:0071944,cell periphery|GO:0031226,intrinsic component of plasma membrane|GO:0043226,organelle|GO:0031224,intrinsic component of membrane|GO:0031982,vesicle|GO:0043227,membrane-bounded organelle|GO:0016021,integral component of membrane|GO:0016020,membrane|GO:0031988,membrane-bounded vesicle|GO:0044459,plasma membrane part|GO:0005887,integral component of plasma membrane|GO:0005886,plasma membr…	GO:0005488,binding|GO:0005515,protein binding|GO:0032403,protein complex binding|GO:0044877,macromolecular complex binding|GO:0005518,collagen binding	hsa04611,Platelet activation|hsa04512,ECM-receptor interaction|hsa04640,Hematopoietic cell lineage	http://www.uniprot.org/uniprot/P40197
Q16543	0.57075	-0.809069	Q16543	CDC37	GO:0008104,protein localization|GO:0019220,regulation of phosphate metabolic process|GO:0019221,cytokine-mediated signaling pathway|GO:0019222,regulation of metabolic process|GO:0048584,positive regulation of response to stimulus|GO:0048583,regulation of response to stimulus|GO:0098779,activation of mitophagy in response to mitochondrial depolarization|GO:0007165,signal transduction|GO:0007166,ce…	GO:0098590,plasma membrane region|GO:0071944,cell periphery|GO:0043227,membrane-bounded organelle|GO:0043226,organelle|GO:0005737,cytoplasm|GO:0001726,ruffle|GO:0042995,cell projection|GO:0031982,vesicle|GO:0098805,whole membrane|GO:0016020,membrane|GO:0031988,membrane-bounded vesicle|GO:1990565,HSP90-CDC37 chaperone complex|GO:0044459,plasma membrane part|GO:0031256,leading edge membrane|GO:0098…	GO:0005488,binding|GO:0008022,protein C-terminus binding|GO:0019207,kinase regulator activity|GO:0031435,mitogen-activated protein kinase kinase kinase binding|GO:0019887,protein kinase regulator activity|GO:0031072,heat shock protein binding|GO:0030234,enzyme regulator activity|GO:0051087,chaperone binding|GO:0019899,enzyme binding|GO:0019901,protein kinase binding|GO:0019900,kinase binding|GO:0…	hsa04151,PI3K-Akt signaling pathway	http://www.uniprot.org/uniprot/Q16543
Q96GG9	0.5713	-0.80768	Q96GG9	DCUN1D1		GO:0043234,protein complex|GO:0032991,macromolecular complex|GO:0043231,intracellular membrane-bounded organelle|GO:0005634,nucleus|GO:0044464,cell part|GO:0000151,ubiquitin ligase complex|GO:0005623,cell|GO:0005622,intracellular|GO:0043229,intracellular organelle|GO:1990234,transferase complex|GO:0044424,intracellular part|GO:0043227,membrane-bounded organelle|GO:0043226,organelle|GO:1902494,cat…	GO:0005488,binding|GO:0005515,protein binding		http://www.uniprot.org/uniprot/Q96GG9
Q86YL5	0.58325	-0.777814	Q86YL5	TDRP	GO:0044703,multi-organism reproductive process|GO:0044702,single organism reproductive process|GO:0048609,multicellular organismal reproductive process|GO:0032504,multicellular organism reproduction|GO:0019953,sexual reproduction|GO:0022414,reproductive process|GO:0007283,spermatogenesis|GO:0032501,multicellular organismal process|GO:0007276,gamete generation|GO:0048232,male gamete generation|GO:…	GO:0005737,cytoplasm|GO:0043231,intracellular membrane-bounded organelle|GO:0005634,nucleus|GO:0044464,cell part|GO:0005623,cell|GO:0005622,intracellular|GO:0043229,intracellular organelle|GO:0044424,intracellular part|GO:0043227,membrane-bounded organelle|GO:0043226,organelle			http://www.uniprot.org/uniprot/Q86YL5
P53004	0.5852	-0.772998	P53004	BLVRA	GO:0006778,porphyrin-containing compound metabolic process|GO:0044248,cellular catabolic process|GO:0034641,cellular nitrogen compound metabolic process|GO:0006807,nitrogen compound metabolic process|GO:0044281,small molecule metabolic process|GO:0044699,single-organism process|GO:1901361,organic cyclic compound catabolic process|GO:0044712,single-organism catabolic process|GO:0044710,single-orga…	GO:0005737,cytoplasm|GO:0005622,intracellular|GO:0043230,extracellular organelle|GO:0031982,vesicle|GO:0044421,extracellular region part|GO:0043227,membrane-bounded organelle|GO:0005829,cytosol|GO:0044464,cell part|GO:0005623,cell|GO:0031988,membrane-bounded vesicle|GO:0044444,cytoplasmic part|GO:0005576,extracellular region|GO:0044424,intracellular part|GO:1903561,extracellular vesicle|GO:006501…	GO:0005488,binding|GO:0043169,cation binding|GO:0046872,metal ion binding|GO:0016628,oxidoreductase activity, acting on the CH-CH group of donors, NAD or NADP as acceptor|GO:0046914,transition metal ion binding|GO:0016627,oxidoreductase activity, acting on the CH-CH group of donors|GO:0043167,ion binding|GO:0003824,catalytic activity|GO:0008270,zinc ion binding|GO:0005515,protein binding|GO:00040…	hsa00860,Porphyrin and chlorophyll metabolism	http://www.uniprot.org/uniprot/P53004
Q13586	0.58745	-0.767462	Q13586	STIM1	GO:0007599,hemostasis|GO:0051049,regulation of transport|GO:0007596,blood coagulation|GO:0034764,positive regulation of transmembrane transport|GO:0034765,regulation of ion transmembrane transport|GO:0034767,positive regulation of ion transmembrane transport|GO:0034762,regulation of transmembrane transport|GO:0032237,activation of store-operated calcium channel activity|GO:0009611,response to wou…	GO:0005783,endoplasmic reticulum|GO:0005789,endoplasmic reticulum membrane|GO:0042175,nuclear outer membrane-endoplasmic reticulum membrane network|GO:0043229,intracellular organelle|GO:0043228,non-membrane-bounded organelle|GO:0031301,integral component of organelle membrane|GO:0031300,intrinsic component of organelle membrane|GO:0005874,microtubule|GO:0031227,intrinsic component of endoplasmic …	GO:0043169,cation binding|GO:0015631,tubulin binding|GO:0046872,metal ion binding|GO:0005515,protein binding|GO:0008092,cytoskeletal protein binding|GO:0008017,microtubule binding|GO:0051010,microtubule plus-end binding|GO:0019899,enzyme binding|GO:0043167,ion binding|GO:0032403,protein complex binding|GO:0044877,macromolecular complex binding|GO:0005509,calcium ion binding|GO:0002020,protease bi…	hsa04020,Calcium signaling pathway|hsa04611,Platelet activation	http://www.uniprot.org/uniprot/Q13586
P17812	0.5878	-0.766603	P17812	CTPS1	GO:0009218,pyrimidine ribonucleotide metabolic process|GO:0009165,nucleotide biosynthetic process|GO:0009163,nucleoside biosynthetic process|GO:0046134,pyrimidine nucleoside biosynthetic process|GO:1901362,organic cyclic compound biosynthetic process|GO:0046131,pyrimidine ribonucleoside metabolic process|GO:0046132,pyrimidine ribonucleoside biosynthetic process|GO:0044710,single-organism metaboli…	GO:0005737,cytoplasm|GO:0005829,cytosol|GO:0016020,membrane|GO:0044464,cell part|GO:0005623,cell|GO:0005622,intracellular|GO:0044444,cytoplasmic part|GO:0044424,intracellular part	GO:0035639,purine ribonucleoside triphosphate binding|GO:0005488,binding|GO:0043167,ion binding|GO:1901363,heterocyclic compound binding|GO:1901265,nucleoside phosphate binding|GO:0001882,nucleoside binding|GO:0043168,anion binding|GO:0000166,nucleotide binding|GO:0016879,ligase activity, forming carbon-nitrogen bonds|GO:0003883,CTP synthase activity|GO:0001883,purine nucleoside binding|GO:003254…	hsa01100,Metabolic pathways|hsa00240,Pyrimidine metabolism	http://www.uniprot.org/uniprot/P17812
Q6ZVM7	0.5891	-0.763416	Q6ZVM7	TOM1L2	GO:0008104,protein localization|GO:0033043,regulation of organelle organization|GO:0000280,nuclear division|GO:0051649,establishment of localization in cell|GO:0051129,negative regulation of cellular component organization|GO:0051128,regulation of cellular component organization|GO:0010948,negative regulation of cell cycle process|GO:0023052,signaling|GO:0007165,signal transduction|GO:0007067,mit…	GO:0005622,intracellular|GO:0043230,extracellular organelle|GO:0031982,vesicle|GO:0044421,extracellular region part|GO:0043227,membrane-bounded organelle|GO:0044464,cell part|GO:0005623,cell|GO:0031988,membrane-bounded vesicle|GO:0005576,extracellular region|GO:1903561,extracellular vesicle|GO:0065010,extracellular membrane-bounded organelle|GO:0043226,organelle|GO:0070062,extracellular exosome	GO:0019899,enzyme binding|GO:0019901,protein kinase binding|GO:0019900,kinase binding|GO:0030276,clathrin binding|GO:0005488,binding|GO:0005515,protein binding		http://www.uniprot.org/uniprot/Q6ZVM7
Q8N699	0.5927	-0.754626	Q8N699	MYCT1		GO:0043231,intracellular membrane-bounded organelle|GO:0005634,nucleus|GO:0044464,cell part|GO:0005623,cell|GO:0005622,intracellular|GO:0043229,intracellular organelle|GO:0044424,intracellular part|GO:0043227,membrane-bounded organelle|GO:0043226,organelle			http://www.uniprot.org/uniprot/Q8N699
O43306	0.5954	-0.748069	O43306	ADCY6	GO:1901566,organonitrogen compound biosynthetic process|GO:0044238,primary metabolic process|GO:0019220,regulation of phosphate metabolic process|GO:0080090,regulation of primary metabolic process|GO:0019222,regulation of metabolic process|GO:0048468,cell development|GO:0032147,activation of protein kinase activity|GO:0009165,nucleotide biosynthetic process|GO:0003014,renal system process|GO:0007…	GO:0016020,membrane|GO:0016021,integral component of membrane|GO:0005929,cilium|GO:0044464,cell part|GO:0005623,cell|GO:0005622,intracellular|GO:0071944,cell periphery|GO:0005886,plasma membrane|GO:0044425,membrane part|GO:0042995,cell projection|GO:0043226,organelle|GO:0031224,intrinsic component of membrane	GO:0035639,purine ribonucleoside triphosphate binding|GO:0019899,enzyme binding|GO:0004016,adenylate cyclase activity|GO:0005488,binding|GO:0043167,ion binding|GO:1901363,heterocyclic compound binding|GO:1901265,nucleoside phosphate binding|GO:0001882,nucleoside binding|GO:0043168,anion binding|GO:0043169,cation binding|GO:0019900,kinase binding|GO:0016829,lyase activity|GO:0016849,phosphorus-oxy…	hsa04611,Platelet activation|hsa04022,cGMP-PKG signaling pathway|hsa04024,cAMP signaling pathway|hsa04723,Retrograde endocannabinoid signaling|hsa04725,Cholinergic synapse|hsa04724,Glutamatergic synapse|hsa04727,GABAergic synapse|hsa04924,Renin secretion|hsa04062,Chemokine signaling pathway|hsa04921,Oxytocin signaling pathway|hsa04962,Vasopressin-regulated water reabsorption|hsa04961,Endocrine an…	http://www.uniprot.org/uniprot/O43306
Q15942	0.5974	-0.743231	Q15942	ZYX	GO:0042221,response to chemical|GO:0022607,cellular component assembly|GO:0061572,actin filament bundle organization|GO:0032101,regulation of response to external stimulus|GO:0043933,macromolecular complex subunit organization|GO:0050896,response to stimulus|GO:0048583,regulation of response to stimulus|GO:0030036,actin cytoskeleton organization|GO:0009611,response to wounding|GO:0007160,cell-mat…	GO:0032432,actin filament bundle|GO:0015629,actin cytoskeleton|GO:0043229,intracellular organelle|GO:0043228,non-membrane-bounded organelle|GO:0005887,integral component of plasma membrane|GO:0005924,cell-substrate adherens junction|GO:0005925,focal adhesion|GO:0043227,membrane-bounded organelle|GO:0043226,organelle|GO:0030054,cell junction|GO:0030055,cell-substrate junction|GO:0005856,cytoskelet…	GO:0005488,binding|GO:0043169,cation binding|GO:0005515,protein binding|GO:0046914,transition metal ion binding|GO:0097159,organic cyclic compound binding|GO:0044822,poly(A) RNA binding|GO:0043167,ion binding|GO:0008270,zinc ion binding|GO:0003676,nucleic acid binding|GO:0046872,metal ion binding|GO:1901363,heterocyclic compound binding|GO:0003723,RNA binding	hsa04510,Focal adhesion	http://www.uniprot.org/uniprot/Q15942
P51606	0.6132	-0.70557	P51606	RENBP	GO:0009892,negative regulation of metabolic process|GO:0080090,regulation of primary metabolic process|GO:0019222,regulation of metabolic process|GO:0006044,N-acetylglucosamine metabolic process|GO:0031324,negative regulation of cellular metabolic process|GO:0031323,regulation of cellular metabolic process|GO:1901575,organic substance catabolic process|GO:0019752,carboxylic acid metabolic process…	GO:0043230,extracellular organelle|GO:0031982,vesicle|GO:0044421,extracellular region part|GO:0043227,membrane-bounded organelle|GO:0031988,membrane-bounded vesicle|GO:0005576,extracellular region|GO:1903561,extracellular vesicle|GO:0065010,extracellular membrane-bounded organelle|GO:0043226,organelle|GO:0070062,extracellular exosome	GO:0030414,peptidase inhibitor activity|GO:0035639,purine ribonucleoside triphosphate binding|GO:0005488,binding|GO:0004857,enzyme inhibitor activity|GO:0098772,molecular function regulator|GO:1901363,heterocyclic compound binding|GO:0001883,purine nucleoside binding|GO:0001882,nucleoside binding|GO:0043168,anion binding|GO:0000166,nucleotide binding|GO:0043167,ion binding|GO:1901265,nucleoside p…	hsa00520,Amino sugar and nucleotide sugar metabolism	http://www.uniprot.org/uniprot/P51606
P23229	0.6147	-0.702046	P23229	ITGA6	GO:2001234,negative regulation of apoptotic signaling pathway|GO:2001236,regulation of extrinsic apoptotic signaling pathway|GO:2001237,negative regulation of extrinsic apoptotic signaling pathway|GO:0019220,regulation of phosphate metabolic process|GO:0080090,regulation of primary metabolic process|GO:0019222,regulation of metabolic process|GO:2001233,regulation of apoptotic signaling pathway|GO…	GO:0098590,plasma membrane region|GO:0098636,protein complex involved in cell adhesion|GO:0009897,external side of plasma membrane|GO:0031012,extracellular matrix|GO:0071944,cell periphery|GO:0098552,side of membrane|GO:0005924,cell-substrate adherens junction|GO:0005925,focal adhesion|GO:0030056,hemidesmosome|GO:0030054,cell junction|GO:0030055,cell-substrate junction|GO:0045178,basal part of ce…	GO:0005178,integrin binding|GO:0050839,cell adhesion molecule binding|GO:0043169,cation binding|GO:0043167,ion binding|GO:0044877,macromolecular complex binding|GO:0005488,binding|GO:0005515,protein binding|GO:0032403,protein complex binding|GO:0005102,receptor binding|GO:0046872,metal ion binding	hsa04510,Focal adhesion|hsa05200,Pathways in cancer|hsa04514,Cell adhesion molecules (CAMs)|hsa04512,ECM-receptor interaction|hsa05222,Small cell lung cancer|hsa04640,Hematopoietic cell lineage|hsa05145,Toxoplasmosis|hsa05410,Hypertrophic cardiomyopathy (HCM)|hsa05412,Arrhythmogenic right ventricular cardiomyopathy (ARVC)|hsa04151,PI3K-Akt signaling pathway|hsa05414,Dilated cardiomyopathy|hsa0481…	http://www.uniprot.org/uniprot/P23229
Q8TAT6	0.61615	-0.698646	Q8TAT6	NPLOC4	GO:0008104,protein localization|GO:1901362,organic cyclic compound biosynthetic process|GO:0071840,cellular component organization or biogenesis|GO:0044712,single-organism catabolic process|GO:0044710,single-organism metabolic process|GO:0044711,single-organism biosynthetic process|GO:0006301,postreplication repair|GO:0070727,cellular macromolecule localization|GO:0010256,endomembrane system orga…	GO:0005783,endoplasmic reticulum|GO:0031974,membrane-enclosed lumen|GO:0005789,endoplasmic reticulum membrane|GO:0042175,nuclear outer membrane-endoplasmic reticulum membrane network|GO:0043229,intracellular organelle|GO:0043227,membrane-bounded organelle|GO:0043226,organelle|GO:0005737,cytoplasm|GO:0031090,organelle membrane|GO:0031981,nuclear lumen|GO:0070013,intracellular organelle lumen|GO:00…	GO:0043169,cation binding|GO:0031625,ubiquitin protein ligase binding|GO:0044389,ubiquitin-like protein ligase binding|GO:0046914,transition metal ion binding|GO:0032182,ubiquitin-like protein binding|GO:0019899,enzyme binding|GO:0043167,ion binding|GO:0043130,ubiquitin binding|GO:0008270,zinc ion binding|GO:0005515,protein binding|GO:0046872,metal ion binding|GO:0005488,binding	hsa04141,Protein processing in endoplasmic reticulum	http://www.uniprot.org/uniprot/Q8TAT6
P56202	0.61745	-0.695606	P56202	CTSW	GO:0044248,cellular catabolic process|GO:0044267,cellular protein metabolic process|GO:1901575,organic substance catabolic process|GO:0044265,cellular macromolecule catabolic process|GO:0044260,cellular macromolecule metabolic process|GO:0071704,organic substance metabolic process|GO:0006508,proteolysis|GO:0044238,primary metabolic process|GO:0009987,cellular process|GO:0030163,protein catabolic …	GO:0005737,cytoplasm|GO:0000323,lytic vacuole|GO:0043231,intracellular membrane-bounded organelle|GO:0005773,vacuole|GO:0016020,membrane|GO:0044464,cell part|GO:0044444,cytoplasmic part|GO:0005623,cell|GO:0005622,intracellular|GO:0005764,lysosome|GO:0044421,extracellular region part|GO:0043229,intracellular organelle|GO:0005576,extracellular region|GO:0044424,intracellular part|GO:0043227,membran…	GO:0016787,hydrolase activity|GO:0004175,endopeptidase activity|GO:0070011,peptidase activity, acting on L-amino acid peptides|GO:0003824,catalytic activity|GO:0004197,cysteine-type endopeptidase activity|GO:0008233,peptidase activity|GO:0008234,cysteine-type peptidase activity	hsa04142,Lysosome	http://www.uniprot.org/uniprot/P56202
P37840	0.61955	-0.690707	P37840	SNCA	GO:0051046,regulation of secretion|GO:0051047,positive regulation of secretion|GO:0051048,negative regulation of secretion|GO:0051049,regulation of transport|GO:0051188,cofactor biosynthetic process|GO:0009167,purine ribonucleoside monophosphate metabolic process|GO:0001504,neurotransmitter uptake|GO:0044281,small molecule metabolic process|GO:0044283,small molecule biosynthetic process|GO:009877…
P35241	0.6238	-0.680845	P35241	RDX	GO:0008105,asymmetric protein localization|GO:0008104,protein localization|GO:0032388,positive regulation of intracellular transport|GO:0080090,regulation of primary metabolic process|GO:0019222,regulation of metabolic process|GO:0060429,epithelium development|GO:0051049,regulation of transport|GO:0032386,regulation of intracellular transport|GO:0048468,cell development|GO:0008064,regulation of a…	GO:0045177,apical part of cell|GO:0097610,cell surface furrow|GO:0019898,extrinsic component of membrane|GO:0030175,filopodium|GO:0043229,intracellular organelle|GO:0043228,non-membrane-bounded organelle|GO:0005924,cell-substrate adherens junction|GO:0005925,focal adhesion|GO:0043227,membrane-bounded organelle|GO:0043226,organelle|GO:0030054,cell junction|GO:0030055,cell-substrate junction|GO:000…	GO:0005515,protein binding|GO:0008092,cytoskeletal protein binding|GO:0097159,organic cyclic compound binding|GO:0044822,poly(A) RNA binding|GO:0003779,actin binding|GO:0003723,RNA binding|GO:0003676,nucleic acid binding|GO:1901363,heterocyclic compound binding|GO:0005488,binding	hsa05205,Proteoglycans in cancer|hsa05206,MicroRNAs in cancer|hsa04810,Regulation of actin cytoskeleton	http://www.uniprot.org/uniprot/P35241
Q9NX76	0.6348	-0.655626	Q9NX76	CMTM6	GO:0040011,locomotion|GO:0006935,chemotaxis|GO:0042330,taxis|GO:0050896,response to stimulus|GO:0042221,response to chemical|GO:0009605,response to external stimulus	GO:0043230,extracellular organelle|GO:0031982,vesicle|GO:0044421,extracellular region part|GO:0043227,membrane-bounded organelle|GO:0016021,integral component of membrane|GO:0016020,membrane|GO:0031988,membrane-bounded vesicle|GO:0005576,extracellular region|GO:0005615,extracellular space|GO:0044425,membrane part|GO:1903561,extracellular vesicle|GO:0065010,extracellular membrane-bounded organelle…	GO:0005102,receptor binding|GO:0005125,cytokine activity|GO:0005488,binding|GO:0005515,protein binding		http://www.uniprot.org/uniprot/Q9NX76
P56377	0.636	-0.652901	P56377	AP1S2	GO:0008104,protein localization|GO:0050688,regulation of defense response to virus|GO:0032101,regulation of response to external stimulus|GO:0006950,response to stress|GO:0048583,regulation of response to stimulus|GO:0051607,defense response to virus|GO:0002495,antigen processing and presentation of peptide antigen via MHC class II|GO:0061024,membrane organization|GO:0044403,symbiosis, encompassi…	GO:0098796,membrane protein complex|GO:0000323,lytic vacuole|GO:0030139,endocytic vesicle|GO:0031984,organelle subcompartment|GO:0043229,intracellular organelle|GO:0030117,membrane coat|GO:0005905,coated pit|GO:0005773,vacuole|GO:0030119,AP-type membrane coat adaptor complex|GO:0005774,vacuolar membrane|GO:0030135,coated vesicle|GO:0043226,organelle|GO:0030136,clathrin-coated vesicle|GO:0030665,c…	GO:0008565,protein transporter activity|GO:0022892,substrate-specific transporter activity|GO:0005215,transporter activity|GO:0005488,binding|GO:0005515,protein binding	hsa04142,Lysosome	http://www.uniprot.org/uniprot/P56377
P16219	0.6368	-0.651088	P16219	ACADS	GO:0034440,lipid oxidation|GO:0006631,fatty acid metabolic process|GO:0022607,cellular component assembly|GO:0042594,response to starvation|GO:0006635,fatty acid beta-oxidation|GO:0051289,protein homotetramerization|GO:0043933,macromolecular complex subunit organization|GO:0009991,response to extracellular stimulus|GO:0019752,carboxylic acid metabolic process|GO:0044248,cellular catabolic process…	GO:0005737,cytoplasm|GO:0043231,intracellular membrane-bounded organelle|GO:0043233,organelle lumen|GO:0005634,nucleus|GO:0044464,cell part|GO:0044444,cytoplasmic part|GO:0031974,membrane-enclosed lumen|GO:0005622,intracellular|GO:0044446,intracellular organelle part|GO:0070013,intracellular organelle lumen|GO:0043229,intracellular organelle|GO:0005739,mitochondrion|GO:0044429,mitochondrial part|…	GO:1901681,sulfur compound binding|GO:0043168,anion binding|GO:0050660,flavin adenine dinucleotide binding|GO:0050662,coenzyme binding|GO:0097159,organic cyclic compound binding|GO:0052890,oxidoreductase activity, acting on the CH-CH group of donors, with a flavin as acceptor|GO:1901363,heterocyclic compound binding|GO:0000062,fatty-acyl-CoA binding|GO:0000166,nucleotide binding|GO:0036094,small …	hsa01100,Metabolic pathways|hsa00071,Fatty acid degradation|hsa01200,Carbon metabolism|hsa00280,Valine, leucine and isoleucine degradation|hsa01212,Fatty acid metabolism|hsa00650,Butanoate metabolism	http://www.uniprot.org/uniprot/P16219
P78344	0.64065	-0.642392	P78344	EIF4G2	GO:0044238,primary metabolic process|GO:0019221,cytokine-mediated signaling pathway|GO:0019222,regulation of metabolic process|GO:0051246,regulation of protein metabolic process|GO:0031323,regulation of cellular metabolic process|GO:1901564,organonitrogen compound metabolic process|GO:0044249,cellular biosynthetic process|GO:0034641,cellular nitrogen compound metabolic process|GO:0043043,peptide …	GO:0043234,protein complex|GO:0005737,cytoplasm|GO:0032991,macromolecular complex|GO:0016281,eukaryotic translation initiation factor 4F complex|GO:0016020,membrane|GO:0044464,cell part|GO:0005623,cell|GO:0005622,intracellular|GO:0044444,cytoplasmic part|GO:0044424,intracellular part|GO:0005829,cytosol	GO:0005488,binding|GO:0005515,protein binding|GO:0097159,organic cyclic compound binding|GO:0044822,poly(A) RNA binding|GO:0008135,translation factor activity, RNA binding|GO:0003723,RNA binding|GO:0003676,nucleic acid binding|GO:1901363,heterocyclic compound binding|GO:0003743,translation initiation factor activity	hsa03013,RNA transport|hsa05416,Viral myocarditis	http://www.uniprot.org/uniprot/P78344
Q9UJU6	0.6465	-0.629278	Q9UJU6	DBNL	GO:0019220,regulation of phosphate metabolic process|GO:0080090,regulation of primary metabolic process|GO:0019222,regulation of metabolic process|GO:0048584,positive regulation of response to stimulus|GO:0048583,regulation of response to stimulus|GO:0032147,activation of protein kinase activity|GO:0043933,macromolecular complex subunit organization|GO:0007165,signal transduction|GO:0051234,estab…	GO:0042995,cell projection|GO:0015629,actin cytoskeleton|GO:0030425,dendrite|GO:0043229,intracellular organelle|GO:0043228,non-membrane-bounded organelle|GO:0045202,synapse|GO:0005622,intracellular|GO:0030135,coated vesicle|GO:0043226,organelle|GO:0030054,cell junction|GO:0030136,clathrin-coated vesicle|GO:0030665,clathrin-coated vesicle membrane|GO:0001726,ruffle|GO:0002102,podosome|GO:0070062,e…	GO:0005488,binding|GO:0008022,protein C-terminus binding|GO:0008092,cytoskeletal protein binding|GO:0030234,enzyme regulator activity|GO:0051015,actin filament binding|GO:0003779,actin binding|GO:0044877,macromolecular complex binding|GO:0008047,enzyme activator activity|GO:0005515,protein binding|GO:0032403,protein complex binding|GO:0098772,molecular function regulator|GO:0019904,protein domain…		http://www.uniprot.org/uniprot/Q9UJU6
Q12841	0.64675	-0.62872	Q12841	FSTL1	GO:0042221,response to chemical|GO:0009991,response to extracellular stimulus|GO:0080090,regulation of primary metabolic process|GO:0019222,regulation of metabolic process|GO:0006950,response to stress|GO:0031326,regulation of cellular biosynthetic process|GO:0031323,regulation of cellular metabolic process|GO:0031667,response to nutrient levels|GO:0090304,nucleic acid metabolic process|GO:003050…	GO:0043230,extracellular organelle|GO:0031982,vesicle|GO:0044421,extracellular region part|GO:0043227,membrane-bounded organelle|GO:0031988,membrane-bounded vesicle|GO:0005576,extracellular region|GO:0005615,extracellular space|GO:1903561,extracellular vesicle|GO:0065010,extracellular membrane-bounded organelle|GO:0043226,organelle|GO:0070062,extracellular exosome	GO:1901681,sulfur compound binding|GO:0043168,anion binding|GO:0043169,cation binding|GO:0097367,carbohydrate derivative binding|GO:0043167,ion binding|GO:0005539,glycosaminoglycan binding|GO:0005509,calcium ion binding|GO:0005515,protein binding|GO:0046872,metal ion binding|GO:0008201,heparin binding|GO:0005488,binding		http://www.uniprot.org/uniprot/Q12841
P12429	0.64875	-0.624265	P12429	ANXA3	GO:0006909,phagocytosis|GO:0080090,regulation of primary metabolic process|GO:0019222,regulation of metabolic process|GO:0072359,circulatory system development|GO:0072358,cardiovascular system development|GO:0032940,secretion by cell|GO:1901362,organic cyclic compound biosynthetic process|GO:0044707,single-multicellular organism process|GO:1901360,organic cyclic compound metabolic process|GO:0010…	GO:0042995,cell projection|GO:0030425,dendrite|GO:0030424,axon|GO:0030139,endocytic vesicle|GO:0043229,intracellular organelle|GO:0071944,cell periphery|GO:0043227,membrane-bounded organelle|GO:0043226,organelle|GO:0005737,cytoplasm|GO:0030666,endocytic vesicle membrane|GO:0070062,extracellular exosome|GO:0016023,cytoplasmic membrane-bounded vesicle|GO:0031410,cytoplasmic vesicle|GO:0098805,whole…	GO:0043168,anion binding|GO:0019834,phospholipase A2 inhibitor activity|GO:0055102,lipase inhibitor activity|GO:0043169,cation binding|GO:0030234,enzyme regulator activity|GO:0005543,phospholipid binding|GO:0005544,calcium-dependent phospholipid binding|GO:0008289,lipid binding|GO:0043167,ion binding|GO:0048306,calcium-dependent protein binding|GO:0046872,metal ion binding|GO:0004859,phospholipas…		http://www.uniprot.org/uniprot/P12429
P13645	0.64885	-0.624043	P13645	KRT10	GO:0071248,cellular response to metal ion|GO:0030154,cell differentiation|GO:0071241,cellular response to inorganic substance|GO:0070887,cellular response to chemical stimulus|GO:0008544,epidermis development|GO:0007275,multicellular organismal development|GO:0044699,single-organism process|GO:0051716,cellular response to stimulus|GO:0048869,cellular developmental process|GO:0048513,organ develop…	GO:0045095,keratin filament|GO:0043229,intracellular organelle|GO:0043228,non-membrane-bounded organelle|GO:0043227,membrane-bounded organelle|GO:0043226,organelle|GO:0005856,cytoskeleton|GO:0045111,intermediate filament cytoskeleton|GO:0031982,vesicle|GO:0005615,extracellular space|GO:0005634,nucleus|GO:0016020,membrane|GO:0031988,membrane-bounded vesicle|GO:0044430,cytoskeletal part|GO:0005737,…	GO:0005198,structural molecule activity|GO:0030280,structural constituent of epidermis	hsa05150,Staphylococcus aureus infection	http://www.uniprot.org/uniprot/P13645
P07359	0.6493	-0.623043	P07359	GP1BA	GO:0032102,negative regulation of response to external stimulus|GO:0007166,cell surface receptor signaling pathway|GO:0032101,regulation of response to external stimulus|GO:0048585,negative regulation of response to stimulus|GO:0007596,blood coagulation|GO:0048583,regulation of response to stimulus|GO:0008152,metabolic process|GO:0061041,regulation of wound healing|GO:0023052,signaling|GO:0007165…	GO:0009897,external side of plasma membrane|GO:0046658,anchored component of plasma membrane|GO:0071944,cell periphery|GO:0098552,side of membrane|GO:0031226,intrinsic component of plasma membrane|GO:0043226,organelle|GO:0031224,intrinsic component of membrane|GO:0031225,anchored component of membrane|GO:0031982,vesicle|GO:0043227,membrane-bounded organelle|GO:0016021,integral component of membra…	GO:0008528,G-protein coupled peptide receptor activity|GO:0004930,G-protein coupled receptor activity|GO:0038023,signaling receptor activity|GO:0005515,protein binding|GO:0015057,thrombin receptor activity|GO:0060089,molecular transducer activity|GO:0004888,transmembrane signaling receptor activity|GO:0001653,peptide receptor activity|GO:0004872,receptor activity|GO:0004871,signal transducer acti…	hsa04611,Platelet activation|hsa04512,ECM-receptor interaction|hsa04640,Hematopoietic cell lineage	http://www.uniprot.org/uniprot/P07359
Q99418	0.6535	-0.613741	Q99418	CYTH2	GO:0006810,transport|GO:0009893,positive regulation of metabolic process|GO:0019222,regulation of metabolic process|GO:0030155,regulation of cell adhesion|GO:0048583,regulation of response to stimulus|GO:0030036,actin cytoskeleton organization|GO:0006897,endocytosis|GO:0023052,signaling|GO:0007165,signal transduction|GO:0023051,regulation of signaling|GO:0051234,establishment of localization|GO:0…	GO:0044463,cell projection part|GO:0030427,site of polarized growth|GO:0030426,growth cone|GO:0043229,intracellular organelle|GO:0071944,cell periphery|GO:0043227,membrane-bounded organelle|GO:0043226,organelle|GO:0005737,cytoplasm|GO:0031984,organelle subcompartment|GO:0016020,membrane|GO:0097458,neuron part|GO:0044431,Golgi apparatus part|GO:0043005,neuron projection|GO:0005794,Golgi apparatus|…	GO:0043168,anion binding|GO:0070679,inositol 1,4,5 trisphosphate binding|GO:0043178,alcohol binding|GO:0005085,guanyl-nucleotide exchange factor activity|GO:0008289,lipid binding|GO:0043167,ion binding|GO:0036094,small molecule binding|GO:0005488,binding|GO:0005515,protein binding|GO:0098772,molecular function regulator|GO:0005086,ARF guanyl-nucleotide exchange factor activity	hsa04144,Endocytosis	http://www.uniprot.org/uniprot/Q99418
O60496	0.656	-0.608232	O60496	DOK2	GO:0007599,hemostasis|GO:0007596,blood coagulation|GO:0006928,movement of cell or subcellular component|GO:0050900,leukocyte migration|GO:0051674,localization of cell|GO:0023052,signaling|GO:0007165,signal transduction|GO:0007166,cell surface receptor signaling pathway|GO:0007167,enzyme linked receptor protein signaling pathway|GO:0007169,transmembrane receptor protein tyrosine kinase signaling p…	GO:0005737,cytoplasm|GO:0005829,cytosol|GO:0044464,cell part|GO:0005623,cell|GO:0005622,intracellular|GO:0044444,cytoplasmic part|GO:0044424,intracellular part	GO:0030674,protein binding, bridging|GO:0005515,protein binding|GO:0019900,kinase binding|GO:0035591,signaling adaptor activity|GO:0005057,receptor signaling protein activity|GO:0005158,insulin receptor binding|GO:0030971,receptor tyrosine kinase binding|GO:0019899,enzyme binding|GO:0005068,transmembrane receptor protein tyrosine kinase adaptor activity|GO:0019901,protein kinase binding|GO:006008…		http://www.uniprot.org/uniprot/O60496
Q14254	0.6577	-0.604498	Q14254	FLOT2	GO:0034114,regulation of heterotypic cell-cell adhesion|GO:0034113,heterotypic cell-cell adhesion|GO:0080090,regulation of primary metabolic process|GO:0019222,regulation of metabolic process|GO:0034110,regulation of homotypic cell-cell adhesion|GO:0048584,positive regulation of response to stimulus|GO:0048583,regulation of response to stimulus|GO:0031349,positive regulation of defense response|G…	GO:0005911,cell-cell junction|GO:0015629,actin cytoskeleton|GO:0098590,plasma membrane region|GO:0045177,apical part of cell|GO:0002080,acrosomal membrane|GO:0005901,caveola|GO:0043229,intracellular organelle|GO:0043228,non-membrane-bounded organelle|GO:0001669,acrosomal vesicle|GO:0044424,intracellular part|GO:0005924,cell-substrate adherens junction|GO:0005925,focal adhesion|GO:0043227,membrane…	GO:0005515,protein binding|GO:0035255,ionotropic glutamate receptor binding|GO:0035254,glutamate receptor binding|GO:0019899,enzyme binding|GO:0002020,protease binding|GO:0046983,protein dimerization activity|GO:0046982,protein heterodimerization activity|GO:0005102,receptor binding|GO:0005488,binding	hsa04910,Insulin signaling pathway	http://www.uniprot.org/uniprot/Q14254
Q04759	0.66575	-0.586948	Q04759	PRKCQ	GO:0033157,regulation of intracellular protein transport|GO:0051169,nuclear transport|GO:0007599,hemostasis|GO:0051046,regulation of secretion|GO:0051047,positive regulation of secretion|GO:0051049,regulation of transport|GO:0007596,blood coagulation|GO:0042035,regulation of cytokine biosynthetic process|GO:0051716,cellular response to stimulus|GO:0048589,developmental growth|GO:0001666,response …	GO:0031594,neuromuscular junction|GO:0043229,intracellular organelle|GO:0071944,cell periphery|GO:0045202,synapse|GO:0043227,membrane-bounded organelle|GO:0043226,organelle|GO:0005737,cytoplasm|GO:0005634,nucleus|GO:0016020,membrane|GO:0044459,plasma membrane part|GO:0042383,sarcolemma|GO:0001772,immunological synapse|GO:0005886,plasma membrane|GO:0043231,intracellular membrane-bounded organelle|…	GO:0035639,purine ribonucleoside triphosphate binding|GO:0004672,protein kinase activity|GO:0043167,ion binding|GO:0004697,protein kinase C activity|GO:1901363,heterocyclic compound binding|GO:0001883,purine nucleoside binding|GO:0001882,nucleoside binding|GO:0019787,ubiquitin-like protein transferase activity|GO:0043169,cation binding|GO:0000166,nucleotide binding|GO:0004674,protein serine/threo…	hsa04660,T cell receptor signaling pathway|hsa04530,Tight junction|hsa04750,Inflammatory mediator regulation of TRP channels|hsa04064,NF-kappa B signaling pathway|hsa04270,Vascular smooth muscle contraction|hsa05162,Measles|hsa04920,Adipocytokine signaling pathway	http://www.uniprot.org/uniprot/Q04759
P07437	0.66745	-0.583268	P07437	TUBB	GO:0022607,cellular component assembly|GO:0044839,cell cycle G2/M phase transition|GO:0070271,protein complex biogenesis|GO:0000086,G2/M transition of mitotic cell cycle|GO:0006955,immune response|GO:1903047,mitotic cell cycle process|GO:0006928,movement of cell or subcellular component|GO:0044770,cell cycle phase transition|GO:0044772,mitotic cell cycle phase transition|GO:0022402,cell cycle pro…	GO:0035770,ribonucleoprotein granule|GO:0044421,extracellular region part|GO:0031970,organelle envelope lumen|GO:0031974,membrane-enclosed lumen|GO:0031975,envelope|GO:0043229,intracellular organelle|GO:0043228,non-membrane-bounded organelle|GO:0036464,cytoplasmic ribonucleoprotein granule|GO:0030529,ribonucleoprotein complex|GO:0005874,microtubule|GO:0043226,organelle|GO:0005856,cytoskeleton|GO:…	GO:0005200,structural constituent of cytoskeleton|GO:0044389,ubiquitin-like protein ligase binding|GO:0035639,purine ribonucleoside triphosphate binding|GO:0032794,GTPase activating protein binding|GO:0019899,enzyme binding|GO:0044877,macromolecular complex binding|GO:0005488,binding|GO:0000166,nucleotide binding|GO:1901363,heterocyclic compound binding|GO:0001883,purine nucleoside binding|GO:000…	hsa05130,Pathogenic Escherichia coli infection|hsa04145,Phagosome|hsa04540,Gap junction	http://www.uniprot.org/uniprot/P07437
Q15691	0.6698	-0.578198	Q15691	MAPRE1	GO:0031110,regulation of microtubule polymerization or depolymerization|GO:0031111,negative regulation of microtubule polymerization or depolymerization|GO:0031113,regulation of microtubule polymerization|GO:0031115,negative regulation of microtubule polymerization|GO:0044839,cell cycle G2/M phase transition|GO:0033043,regulation of organelle organization|GO:0000086,G2/M transition of mitotic cel…	GO:0098590,plasma membrane region|GO:0035371,microtubule plus-end|GO:0030981,cortical microtubule cytoskeleton|GO:0043229,intracellular organelle|GO:0043228,non-membrane-bounded organelle|GO:0005874,microtubule|GO:1990752,microtubule end|GO:0043227,membrane-bounded organelle|GO:0043226,organelle|GO:0005856,cytoskeleton|GO:0005819,spindle|GO:0005813,centrosome|GO:0098805,whole membrane|GO:0016020,…	GO:0015631,tubulin binding|GO:0005515,protein binding|GO:0008092,cytoskeletal protein binding|GO:0097159,organic cyclic compound binding|GO:0008017,microtubule binding|GO:0051010,microtubule plus-end binding|GO:0008022,protein C-terminus binding|GO:1901363,heterocyclic compound binding|GO:0044877,macromolecular complex binding|GO:0003723,RNA binding|GO:0003676,nucleic acid binding|GO:0032403,prot…		http://www.uniprot.org/uniprot/Q15691
P23219	1.50615	0.590865	P23219	PTGS1	GO:0045907,positive regulation of vasoconstriction|GO:0051046,regulation of secretion|GO:0051048,negative regulation of secretion|GO:0051049,regulation of transport|GO:0007612,learning|GO:0007613,memory|GO:0007610,behavior|GO:0007611,learning or memory|GO:0003012,muscle system process|GO:0003013,circulatory system process|GO:0044281,small molecule metabolic process|GO:0044283,small molecule biosy…	GO:0042995,cell projection|GO:0016020,membrane|GO:0005783,endoplasmic reticulum|GO:0005789,endoplasmic reticulum membrane|GO:0042175,nuclear outer membrane-endoplasmic reticulum membrane network|GO:0043229,intracellular organelle|GO:0005929,cilium|GO:0031988,membrane-bounded vesicle|GO:0043227,membrane-bounded organelle|GO:0043226,organelle|GO:0005737,cytoplasm|GO:0072372,primary cilium|GO:003198…	GO:0043169,cation binding|GO:0043167,ion binding|GO:0046872,metal ion binding|GO:0020037,heme binding|GO:0051213,dioxygenase activity|GO:0046906,tetrapyrrole binding|GO:0097159,organic cyclic compound binding|GO:0016209,antioxidant activity|GO:0016705,oxidoreductase activity, acting on paired donors, with incorporation or reduction of molecular oxygen|GO:0008289,lipid binding|GO:1901363,heterocyc…	hsa04923,Regulation of lipolysis in adipocytes|hsa00590,Arachidonic acid metabolism|hsa04611,Platelet activation|hsa01100,Metabolic pathways|hsa04726,Serotonergic synapse	http://www.uniprot.org/uniprot/P23219
P0CG06	1.5124	0.59684	P0CG06	IGLC3	GO:0006909,phagocytosis|GO:0006950,response to stress|GO:0048584,positive regulation of response to stimulus|GO:0048583,regulation of response to stimulus|GO:0023052,signaling|GO:0007165,signal transduction|GO:0007166,cell surface receptor signaling pathway|GO:0002455,humoral immune response mediated by circulating immunoglobulin|GO:0006955,immune response|GO:0050789,regulation of biological proc…	GO:0005615,extracellular space|GO:0016020,membrane|GO:0044464,cell part|GO:0005623,cell|GO:0071944,cell periphery|GO:0005886,plasma membrane|GO:0044421,extracellular region part|GO:0005576,extracellular region	GO:0005488,binding|GO:0003823,antigen binding		http://www.uniprot.org/uniprot/P0CG06
P27105	1.5166	0.600841	P27105	STOM	GO:0033157,regulation of intracellular protein transport|GO:0008104,protein localization|GO:0032388,positive regulation of intracellular transport|GO:0050688,regulation of defense response to virus|GO:0019222,regulation of metabolic process|GO:0051049,regulation of transport|GO:0032386,regulation of intracellular transport|GO:0048584,positive regulation of response to stimulus|GO:0048583,regulati…	GO:0005783,endoplasmic reticulum|GO:0044421,extracellular region part|GO:0048770,pigment granule|GO:0043229,intracellular organelle|GO:0043228,non-membrane-bounded organelle|GO:0072562,blood microparticle|GO:0043227,membrane-bounded organelle|GO:0043226,organelle|GO:0031224,intrinsic component of membrane|GO:0005856,cytoskeleton|GO:0070062,extracellular exosome|GO:0016023,cytoplasmic membrane-bou…	GO:0070063,RNA polymerase binding|GO:0019899,enzyme binding|GO:0005488,binding|GO:0005515,protein binding|GO:0046983,protein dimerization activity|GO:0042802,identical protein binding|GO:0042803,protein homodimerization activity		http://www.uniprot.org/uniprot/P27105
Q9ULV4	1.5206	0.604641	Q9ULV4	CORO1C	GO:0043549,regulation of kinase activity|GO:0019220,regulation of phosphate metabolic process|GO:0080090,regulation of primary metabolic process|GO:0019222,regulation of metabolic process|GO:0034446,substrate adhesion-dependent cell spreading|GO:0048468,cell development|GO:0007160,cell-matrix adhesion|GO:0060491,regulation of cell projection assembly|GO:0008104,protein localization|GO:0007165,sig…	GO:0098590,plasma membrane region|GO:0015629,actin cytoskeleton|GO:0005901,caveola|GO:0043229,intracellular organelle|GO:0043228,non-membrane-bounded organelle|GO:0044853,plasma membrane raft|GO:0005925,focal adhesion|GO:0005924,cell-substrate adherens junction|GO:0030054,cell junction|GO:0030055,cell-substrate junction|GO:0005856,cytoskeleton|GO:0031982,vesicle|GO:0016600,flotillin complex|GO:00…	GO:0019899,enzyme binding|GO:0008092,cytoskeletal protein binding|GO:0051020,GTPase binding|GO:0051015,actin filament binding|GO:0017016,Ras GTPase binding|GO:0003779,actin binding|GO:0031267,small GTPase binding|GO:0048365,Rac GTPase binding|GO:0044877,macromolecular complex binding|GO:0017048,Rho GTPase binding|GO:0005515,protein binding|GO:0032403,protein complex binding|GO:0005488,binding		http://www.uniprot.org/uniprot/Q9ULV4
P01009	1.5225	0.606442	P01009	SERPINA1	GO:0006954,inflammatory response|GO:0009892,negative regulation of metabolic process|GO:0080090,regulation of primary metabolic process|GO:0019222,regulation of metabolic process|GO:0006950,response to stress|GO:0031324,negative regulation of cellular metabolic process|GO:0031323,regulation of cellular metabolic process|GO:0032940,secretion by cell|GO:0032501,multicellular organismal process|GO:0…	GO:0005783,endoplasmic reticulum|GO:0044421,extracellular region part|GO:0031974,membrane-enclosed lumen|GO:0031012,extracellular matrix|GO:0043229,intracellular organelle|GO:0060205,cytoplasmic membrane-bounded vesicle lumen|GO:0043227,membrane-bounded organelle|GO:0043226,organelle|GO:0005737,cytoplasm|GO:0031983,vesicle lumen|GO:0070062,extracellular exosome|GO:0031093,platelet alpha granule l…	GO:0001948,glycoprotein binding|GO:0004866,endopeptidase inhibitor activity|GO:0097367,carbohydrate derivative binding|GO:0061135,endopeptidase regulator activity|GO:0061134,peptidase regulator activity|GO:0019899,enzyme binding|GO:0002020,protease binding|GO:0005515,protein binding|GO:0030414,peptidase inhibitor activity|GO:0004867,serine-type endopeptidase inhibitor activity|GO:0004857,enzyme i…	hsa04610,Complement and coagulation cascades	http://www.uniprot.org/uniprot/P01009
Q7Z4W1	1.53815	0.621196	Q7Z4W1	DCXR	GO:0019321,pentose metabolic process|GO:0006739,NADP metabolic process|GO:0051289,protein homotetramerization|GO:0043933,macromolecular complex subunit organization|GO:0006733,oxidoreduction coenzyme metabolic process|GO:0006807,nitrogen compound metabolic process|GO:0034641,cellular nitrogen compound metabolic process|GO:0022607,cellular component assembly|GO:1901360,organic cyclic compound meta…	GO:0043229,intracellular organelle|GO:0043228,non-membrane-bounded organelle|GO:0005874,microtubule|GO:0043226,organelle|GO:0005856,cytoskeleton|GO:0042995,cell projection|GO:0031982,vesicle|GO:0043227,membrane-bounded organelle|GO:0005634,nucleus|GO:0016020,membrane|GO:0031988,membrane-bounded vesicle|GO:0044430,cytoskeletal part|GO:0005576,extracellular region|GO:0005737,cytoplasm|GO:0015630,mi…	GO:0016614,oxidoreductase activity, acting on CH-OH group of donors|GO:0016616,oxidoreductase activity, acting on the CH-OH group of donors, NAD or NADP as acceptor|GO:0003824,catalytic activity|GO:0016655,oxidoreductase activity, acting on NAD(P)H, quinone or similar compound as acceptor|GO:0050038,L-xylulose reductase (NADP+) activity|GO:0016651,oxidoreductase activity, acting on NAD(P)H|GO:001…	hsa01100,Metabolic pathways|hsa00040,Pentose and glucuronate interconversions	http://www.uniprot.org/uniprot/Q7Z4W1
P01023	1.54035	0.623258	P01023	A2M	GO:0007599,hemostasis|GO:0080090,regulation of primary metabolic process|GO:0019222,regulation of metabolic process|GO:0048585,negative regulation of response to stimulus|GO:0048584,positive regulation of response to stimulus|GO:0048583,regulation of response to stimulus|GO:0031348,negative regulation of defense response|GO:0007165,signal transduction|GO:0031347,regulation of defense response|GO:…	GO:0031974,membrane-enclosed lumen|GO:0043229,intracellular organelle|GO:0060205,cytoplasmic membrane-bounded vesicle lumen|GO:0043227,membrane-bounded organelle|GO:0043226,organelle|GO:0005737,cytoplasm|GO:0031983,vesicle lumen|GO:0070062,extracellular exosome|GO:0031093,platelet alpha granule lumen|GO:0016023,cytoplasmic membrane-bounded vesicle|GO:0031410,cytoplasmic vesicle|GO:0072562,blood m…	GO:0030414,peptidase inhibitor activity|GO:0019958,C-X-C chemokine binding|GO:0048306,calcium-dependent protein binding|GO:0019956,chemokine binding|GO:0019955,cytokine binding|GO:0019899,enzyme binding|GO:0005488,binding|GO:0004857,enzyme inhibitor activity|GO:0098772,molecular function regulator|GO:0019959,interleukin-8 binding|GO:0019838,growth factor binding|GO:0002020,protease binding|GO:004…	hsa04610,Complement and coagulation cascades	http://www.uniprot.org/uniprot/P01023
P02774	1.5524	0.6345	P02774	GC	GO:0009991,response to extracellular stimulus|GO:0006775,fat-soluble vitamin metabolic process|GO:0007595,lactation|GO:0032355,response to estradiol|GO:0014070,response to organic cyclic compound|GO:0032941,secretion by tissue|GO:0044281,small molecule metabolic process|GO:0007275,multicellular organismal development|GO:0044699,single-organism process|GO:0009719,response to endogenous stimulus|GO…	GO:0042995,cell projection|GO:0000323,lytic vacuole|GO:0031974,membrane-enclosed lumen|GO:0030424,axon|GO:0043229,intracellular organelle|GO:0072562,blood microparticle|GO:0043227,membrane-bounded organelle|GO:0043226,organelle|GO:0005737,cytoplasm|GO:0044446,intracellular organelle part|GO:0043202,lysosomal lumen|GO:0070062,extracellular exosome|GO:0005773,vacuole|GO:0005615,extracellular space|…	GO:0003779,actin binding|GO:1902271,D3 vitamins binding|GO:0051183,vitamin transporter activity|GO:0043178,alcohol binding|GO:0005215,transporter activity|GO:0008092,cytoskeletal protein binding|GO:0008289,lipid binding|GO:0019842,vitamin binding|GO:0036094,small molecule binding|GO:0005496,steroid binding|GO:0005488,binding|GO:0005515,protein binding|GO:0005499,vitamin D binding|GO:1902118,calci…		http://www.uniprot.org/uniprot/P02774
Q86UX7	1.5636	0.644871	Q86UX7	FERMT3	GO:0022607,cellular component assembly|GO:0016337,single organismal cell-cell adhesion|GO:0034446,substrate adhesion-dependent cell spreading|GO:0043933,macromolecular complex subunit organization|GO:0050896,response to stimulus|GO:0030155,regulation of cell adhesion|GO:0030154,cell differentiation|GO:0048468,cell development|GO:0007596,blood coagulation|GO:0022407,regulation of cell-cell adhesio…	GO:0015629,actin cytoskeleton|GO:0043229,intracellular organelle|GO:0043228,non-membrane-bounded organelle|GO:0005623,cell|GO:0043227,membrane-bounded organelle|GO:0043226,organelle|GO:0030054,cell junction|GO:0005856,cytoskeleton|GO:0002102,podosome|GO:0031982,vesicle|GO:0016020,membrane|GO:0031988,membrane-bounded vesicle|GO:0044430,cytoskeletal part|GO:0032991,macromolecular complex|GO:0042995…	GO:0005178,integrin binding|GO:0044877,macromolecular complex binding|GO:0005488,binding|GO:0005515,protein binding|GO:0032403,protein complex binding|GO:0005102,receptor binding|GO:0050839,cell adhesion molecule binding	hsa04611,Platelet activation	http://www.uniprot.org/uniprot/Q86UX7
P22695	1.57865	0.658691	P22695	UQCRC2	GO:0009141,nucleoside triphosphate metabolic process|GO:0009144,purine nucleoside triphosphate metabolic process|GO:0009167,purine ribonucleoside monophosphate metabolic process|GO:0034641,cellular nitrogen compound metabolic process|GO:0009060,aerobic respiration|GO:0044281,small molecule metabolic process|GO:0009161,ribonucleoside monophosphate metabolic process|GO:0009123,nucleoside monophosph…	GO:0044464,cell part|GO:1990204,oxidoreductase complex|GO:0043229,intracellular organelle|GO:0070069,cytochrome complex|GO:0031988,membrane-bounded vesicle|GO:0043227,membrane-bounded organelle|GO:0043226,organelle|GO:0031224,intrinsic component of membrane|GO:0005737,cytoplasm|GO:0031982,vesicle|GO:0098796,membrane protein complex|GO:0031975,envelope|GO:0016021,integral component of membrane|GO:…	GO:0016787,hydrolase activity|GO:0004175,endopeptidase activity|GO:0004222,metalloendopeptidase activity|GO:0046914,transition metal ion binding|GO:0043169,cation binding|GO:0043167,ion binding|GO:0003824,catalytic activity|GO:0070011,peptidase activity, acting on L-amino acid peptides|GO:0044877,macromolecular complex binding|GO:0008270,zinc ion binding|GO:0005515,protein binding|GO:0032403,prot…	hsa00190,Oxidative phosphorylation|hsa04260,Cardiac muscle contraction|hsa01100,Metabolic pathways|hsa04932,Non-alcoholic fatty liver disease (NAFLD)|hsa05016,Huntington's disease|hsa05010,Alzheimer's disease|hsa05012,Parkinson's disease	http://www.uniprot.org/uniprot/P22695
Q13637	1.58625	0.66562	Q13637	RAB32	GO:0022607,cellular component assembly|GO:0051234,establishment of localization|GO:0048753,pigment granule organization|GO:0032438,melanosome organization|GO:0030154,cell differentiation|GO:0048757,pigment granule maturation|GO:0048066,developmental pigmentation|GO:0008104,protein localization|GO:0023052,signaling|GO:0007165,signal transduction|GO:0051641,cellular localization|GO:0035556,intracel…	GO:0048770,pigment granule|GO:0031974,membrane-enclosed lumen|GO:0030139,endocytic vesicle|GO:0043229,intracellular organelle|GO:0043227,membrane-bounded organelle|GO:0043226,organelle|GO:0005737,cytoplasm|GO:0030666,endocytic vesicle membrane|GO:0031982,vesicle|GO:0016023,cytoplasmic membrane-bounded vesicle|GO:0031410,cytoplasmic vesicle|GO:0098805,whole membrane|GO:0016020,membrane|GO:0005739,…	GO:0035639,purine ribonucleoside triphosphate binding|GO:0036461,BLOC-2 complex binding|GO:0044877,macromolecular complex binding|GO:0005488,binding|GO:0043167,ion binding|GO:1901363,heterocyclic compound binding|GO:0001883,purine nucleoside binding|GO:0001882,nucleoside binding|GO:0043168,anion binding|GO:0030742,GTP-dependent protein binding|GO:0016462,pyrophosphatase activity|GO:0000166,nucleo…		http://www.uniprot.org/uniprot/Q13637
P00387	1.58815	0.667347	P00387	CYB5R3	GO:0019752,carboxylic acid metabolic process|GO:0044723,single-organism carbohydrate metabolic process|GO:0016125,sterol metabolic process|GO:0044281,small molecule metabolic process|GO:0044283,small molecule biosynthetic process|GO:1901362,organic cyclic compound biosynthetic process|GO:0044699,single-organism process|GO:0019852,L-ascorbic acid metabolic process|GO:0044710,single-organism metabo…	GO:0016020,membrane|GO:0005783,endoplasmic reticulum|GO:0044464,cell part|GO:0031090,organelle membrane|GO:0005789,endoplasmic reticulum membrane|GO:0042175,nuclear outer membrane-endoplasmic reticulum membrane network|GO:0043229,intracellular organelle|GO:0043228,non-membrane-bounded organelle|GO:0005833,hemoglobin complex|GO:0043227,membrane-bounded organelle|GO:0043226,organelle|GO:0005737,cyt…	GO:0051287,NAD binding|GO:0005488,binding|GO:0001883,purine nucleoside binding|GO:0043167,ion binding|GO:1901363,heterocyclic compound binding|GO:1901265,nucleoside phosphate binding|GO:0001882,nucleoside binding|GO:0043168,anion binding|GO:0043169,cation binding|GO:0050660,flavin adenine dinucleotide binding|GO:0000166,nucleotide binding|GO:0071949,FAD binding|GO:0032549,ribonucleoside binding|G…	hsa00520,Amino sugar and nucleotide sugar metabolism	http://www.uniprot.org/uniprot/P00387
Q14165	1.62555	0.700928	Q14165	MLEC	GO:0006457,protein folding|GO:0044249,cellular biosynthetic process|GO:0034645,cellular macromolecule biosynthetic process|GO:0009100,glycoprotein metabolic process|GO:0009101,glycoprotein biosynthetic process|GO:0044699,single-organism process|GO:0044267,cellular protein metabolic process|GO:0044710,single-organism metabolic process|GO:0044260,cellular macromolecule metabolic process|GO:0006487,…	GO:0005783,endoplasmic reticulum|GO:0005789,endoplasmic reticulum membrane|GO:0042175,nuclear outer membrane-endoplasmic reticulum membrane network|GO:0043229,intracellular organelle|GO:0043227,membrane-bounded organelle|GO:0043226,organelle|GO:0031224,intrinsic component of membrane|GO:0005737,cytoplasm|GO:0031090,organelle membrane|GO:0016021,integral component of membrane|GO:0016020,membrane|G…	GO:0005488,binding|GO:0030246,carbohydrate binding|GO:0019899,enzyme binding|GO:0005515,protein binding		http://www.uniprot.org/uniprot/Q14165
P00747	1.6296	0.704518	P00747	PLG	GO:0007599,hemostasis|GO:0048585,negative regulation of response to stimulus|GO:0048584,positive regulation of response to stimulus|GO:0048583,regulation of response to stimulus|GO:0048771,tissue remodeling|GO:0007162,negative regulation of cell adhesion|GO:0071840,cellular component organization or biogenesis|GO:0009611,response to wounding|GO:0048518,positive regulation of biological process|GO…	GO:0019897,extrinsic component of plasma membrane|GO:0009897,external side of plasma membrane|GO:0098552,side of membrane|GO:0031974,membrane-enclosed lumen|GO:0019898,extrinsic component of membrane|GO:0043229,intracellular organelle|GO:0071944,cell periphery|GO:0060205,cytoplasmic membrane-bounded vesicle lumen|GO:0043227,membrane-bounded organelle|GO:0043226,organelle|GO:0005737,cytoplasm|GO:0…	GO:0005488,binding|GO:0004252,serine-type endopeptidase activity|GO:0004175,endopeptidase activity|GO:0017171,serine hydrolase activity|GO:0016787,hydrolase activity|GO:0034185,apolipoprotein binding|GO:0003824,catalytic activity|GO:0070011,peptidase activity, acting on L-amino acid peptides|GO:0019904,protein domain specific binding|GO:0005515,protein binding|GO:0008233,peptidase activity|GO:000…	hsa05164,Influenza A|hsa04080,Neuroactive ligand-receptor interaction|hsa04610,Complement and coagulation cascades|hsa05150,Staphylococcus aureus infection	http://www.uniprot.org/uniprot/P00747
P02790	1.6318	0.706464	P02790	HPX	GO:0019220,regulation of phosphate metabolic process|GO:0019221,cytokine-mediated signaling pathway|GO:0019222,regulation of metabolic process|GO:0048584,positive regulation of response to stimulus|GO:0048583,regulation of response to stimulus|GO:0006778,porphyrin-containing compound metabolic process|GO:0031349,positive regulation of defense response|GO:0002706,regulation of lymphocyte mediated …	GO:0031974,membrane-enclosed lumen|GO:0030139,endocytic vesicle|GO:0043229,intracellular organelle|GO:0060205,cytoplasmic membrane-bounded vesicle lumen|GO:0043227,membrane-bounded organelle|GO:0043226,organelle|GO:0005737,cytoplasm|GO:0031983,vesicle lumen|GO:0070062,extracellular exosome|GO:0071682,endocytic vesicle lumen|GO:0016023,cytoplasmic membrane-bounded vesicle|GO:0031410,cytoplasmic ve…	GO:0051184,cofactor transporter activity|GO:0015232,heme transporter activity|GO:0043169,cation binding|GO:0005215,transporter activity|GO:0043167,ion binding|GO:0005488,binding|GO:0005515,protein binding|GO:0046872,metal ion binding		http://www.uniprot.org/uniprot/P02790
P61604	1.6327	0.70726	P61604	HSPE1	GO:0032502,developmental process|GO:0006457,protein folding|GO:0080090,regulation of primary metabolic process|GO:0019222,regulation of metabolic process|GO:0031325,positive regulation of cellular metabolic process|GO:0030154,cell differentiation|GO:0031323,regulation of cellular metabolic process|GO:2001056,positive regulation of cysteine-type endopeptidase activity|GO:0031638,zymogen activation…	GO:0031974,membrane-enclosed lumen|GO:0043229,intracellular organelle|GO:0043227,membrane-bounded organelle|GO:0043226,organelle|GO:0005737,cytoplasm|GO:0070062,extracellular exosome|GO:0016020,membrane|GO:0005739,mitochondrion|GO:0031988,membrane-bounded vesicle|GO:0005759,mitochondrial matrix|GO:1903561,extracellular vesicle|GO:0031982,vesicle|GO:0043230,extracellular organelle|GO:0043231,intra…	GO:0035639,purine ribonucleoside triphosphate binding|GO:0005488,binding|GO:0003676,nucleic acid binding|GO:0000166,nucleotide binding|GO:1901363,heterocyclic compound binding|GO:1901265,nucleoside phosphate binding|GO:0001882,nucleoside binding|GO:0043168,anion binding|GO:0051087,chaperone binding|GO:0051082,unfolded protein binding|GO:0043167,ion binding|GO:0001883,purine nucleoside binding|GO:…		http://www.uniprot.org/uniprot/P61604
P14406	1.64225	0.715674	P14406	COX7A2	GO:0044699,single-organism process|GO:0006818,hydrogen transport|GO:0015992,proton transport|GO:0051234,establishment of localization|GO:1902600,hydrogen ion transmembrane transport|GO:0006812,cation transport|GO:0006811,ion transport|GO:0009987,cellular process|GO:0015672,monovalent inorganic cation transport|GO:0034220,ion transmembrane transport|GO:0044765,single-organism transport|GO:0044763,…	GO:0044464,cell part|GO:0031975,envelope|GO:0043229,intracellular organelle|GO:0043227,membrane-bounded organelle|GO:0043226,organelle|GO:0005737,cytoplasm|GO:0031982,vesicle|GO:0016020,membrane|GO:0044444,cytoplasmic part|GO:0005739,mitochondrion|GO:0031988,membrane-bounded vesicle|GO:0044455,mitochondrial membrane part|GO:0031967,organelle envelope|GO:0031966,mitochondrial membrane|GO:1903561,e…	GO:0004129,cytochrome-c oxidase activity|GO:0022890,inorganic cation transmembrane transporter activity|GO:0022891,substrate-specific transmembrane transporter activity|GO:0022892,substrate-specific transporter activity|GO:0005215,transporter activity|GO:0008324,cation transmembrane transporter activity|GO:0022857,transmembrane transporter activity|GO:0015075,ion transmembrane transporter activit…	hsa00190,Oxidative phosphorylation|hsa04260,Cardiac muscle contraction|hsa04932,Non-alcoholic fatty liver disease (NAFLD)|hsa05016,Huntington's disease|hsa05010,Alzheimer's disease|hsa05012,Parkinson's disease	http://www.uniprot.org/uniprot/P14406
P21796	1.64465	0.717781	P21796	VDAC1	GO:0019222,regulation of metabolic process|GO:0051049,regulation of transport|GO:0007612,learning|GO:0007610,behavior|GO:0007611,learning or memory|GO:0006820,anion transport|GO:0034765,regulation of ion transmembrane transport|GO:0034762,regulation of transmembrane transport|GO:0044712,single-organism catabolic process|GO:0044710,single-organism metabolic process|GO:0048869,cellular developmenta…	GO:0098796,membrane protein complex|GO:0044421,extracellular region part|GO:0044464,cell part|GO:0031974,membrane-enclosed lumen|GO:0031975,envelope|GO:0043229,intracellular organelle|GO:0043228,non-membrane-bounded organelle|GO:0042645,mitochondrial nucleoid|GO:0043227,membrane-bounded organelle|GO:0043226,organelle|GO:0031224,intrinsic component of membrane|GO:0005737,cytoplasm|GO:0046930,pore …	GO:0019899,enzyme binding|GO:0044877,macromolecular complex binding|GO:0005488,binding|GO:0022838,substrate-specific channel activity|GO:0008509,anion transmembrane transporter activity|GO:0022829,wide pore channel activity|GO:0032403,protein complex binding|GO:0022803,passive transmembrane transporter activity|GO:0005253,anion channel activity|GO:0005215,transporter activity|GO:0005216,ion chann…	hsa04022,cGMP-PKG signaling pathway|hsa04020,Calcium signaling pathway|hsa05164,Influenza A|hsa05166,HTLV-I infection|hsa05016,Huntington's disease|hsa05012,Parkinson's disease	http://www.uniprot.org/uniprot/P21796
Q8NBM8	1.65285	0.724956	Q8NBM8	PCYOX1L	GO:0030327,prenylated protein catabolic process|GO:0030328,prenylcysteine catabolic process|GO:0030329,prenylcysteine metabolic process|GO:0019752,carboxylic acid metabolic process|GO:0009063,cellular amino acid catabolic process|GO:0043436,oxoacid metabolic process|GO:0006807,nitrogen compound metabolic process|GO:0044281,small molecule metabolic process|GO:0044282,small molecule catabolic proce…	GO:0005737,cytoplasm|GO:0043231,intracellular membrane-bounded organelle|GO:0005773,vacuole|GO:0098588,bounding membrane of organelle|GO:0016020,membrane|GO:0044464,cell part|GO:0044444,cytoplasmic part|GO:0005623,cell|GO:0005774,vacuolar membrane|GO:0044446,intracellular organelle part|GO:0043229,intracellular organelle|GO:0005576,extracellular region|GO:0044437,vacuolar part|GO:0044424,intracel…	GO:0003824,catalytic activity|GO:0016670,oxidoreductase activity, acting on a sulfur group of donors, oxygen as acceptor|GO:0016667,oxidoreductase activity, acting on a sulfur group of donors|GO:0001735,prenylcysteine oxidase activity|GO:0016491,oxidoreductase activity		http://www.uniprot.org/uniprot/Q8NBM8
P01871	1.65355	0.725567	P01871	IGHM	GO:0002376,immune system process|GO:0009607,response to biotic stimulus|GO:0043207,response to external biotic stimulus|GO:0019730,antimicrobial humoral response|GO:0019731,antibacterial humoral response|GO:0050896,response to stimulus|GO:0045087,innate immune response|GO:0009617,response to bacterium|GO:0006952,defense response|GO:0006950,response to stress|GO:0098542,defense response to other o…	GO:0071944,cell periphery|GO:0042571,immunoglobulin complex, circulating|GO:0019814,immunoglobulin complex|GO:0043227,membrane-bounded organelle|GO:0043226,organelle|GO:0031224,intrinsic component of membrane|GO:0031982,vesicle|GO:0005615,extracellular space|GO:0016021,integral component of membrane|GO:0016020,membrane|GO:0072562,blood microparticle|GO:0031988,membrane-bounded vesicle|GO:0044425,…	GO:0034987,immunoglobulin receptor binding|GO:1901363,heterocyclic compound binding|GO:0005488,binding|GO:0003676,nucleic acid binding|GO:0003677,DNA binding|GO:0005539,glycosaminoglycan binding|GO:0043168,anion binding|GO:0043169,cation binding|GO:0043566,structure-specific DNA binding|GO:0005543,phospholipid binding|GO:0043167,ion binding|GO:0003697,single-stranded DNA binding|GO:0008289,lipid …		http://www.uniprot.org/uniprot/P01871
P07954	1.6695	0.739416	P07954	FH	GO:0060249,anatomical structure homeostasis|GO:0019752,carboxylic acid metabolic process|GO:0042592,homeostatic process|GO:0006099,tricarboxylic acid cycle|GO:0009060,aerobic respiration|GO:0044281,small molecule metabolic process|GO:0006091,generation of precursor metabolites and energy|GO:0072350,tricarboxylic acid metabolic process|GO:0044699,single-organism process|GO:0044710,single-organism …	GO:0031974,membrane-enclosed lumen|GO:0043229,intracellular organelle|GO:0043227,membrane-bounded organelle|GO:0043226,organelle|GO:0005737,cytoplasm|GO:0070062,extracellular exosome|GO:0005739,mitochondrion|GO:0031988,membrane-bounded vesicle|GO:0005759,mitochondrial matrix|GO:0045239,tricarboxylic acid cycle enzyme complex|GO:0032991,macromolecular complex|GO:1903561,extracellular vesicle|GO:00…	GO:0016835,carbon-oxygen lyase activity|GO:0016836,hydro-lyase activity|GO:0003824,catalytic activity|GO:0005488,binding|GO:0005515,protein binding|GO:0004333,fumarate hydratase activity|GO:0016829,lyase activity	hsa00620,Pyruvate metabolism|hsa01100,Metabolic pathways|hsa05211,Renal cell carcinoma|hsa05200,Pathways in cancer|hsa01200,Carbon metabolism|hsa01130,Biosynthesis of antibiotics|hsa00020,Citrate cycle (TCA cycle)	http://www.uniprot.org/uniprot/P07954
P14854	1.67635	0.745323	P14854	COX6B1	GO:0044707,single-multicellular organism process|GO:0032774,RNA biosynthetic process|GO:1902600,hydrogen ion transmembrane transport|GO:0006810,transport|GO:0006366,transcription from RNA polymerase II promoter|GO:0090304,nucleic acid metabolic process|GO:0044249,cellular biosynthetic process|GO:0034641,cellular nitrogen compound metabolic process|GO:0060322,head development|GO:0021762,substantia…	GO:0044464,cell part|GO:0031970,organelle envelope lumen|GO:0031974,membrane-enclosed lumen|GO:0031975,envelope|GO:0043229,intracellular organelle|GO:0043227,membrane-bounded organelle|GO:0043226,organelle|GO:0005737,cytoplasm|GO:0031090,organelle membrane|GO:0016020,membrane|GO:0044444,cytoplasmic part|GO:0005739,mitochondrion|GO:0005758,mitochondrial intermembrane space|GO:0031967,organelle env…	GO:0004129,cytochrome-c oxidase activity|GO:0022890,inorganic cation transmembrane transporter activity|GO:0022891,substrate-specific transmembrane transporter activity|GO:0022892,substrate-specific transporter activity|GO:0005215,transporter activity|GO:0008324,cation transmembrane transporter activity|GO:0022857,transmembrane transporter activity|GO:0015075,ion transmembrane transporter activit…	hsa00190,Oxidative phosphorylation|hsa04260,Cardiac muscle contraction|hsa01100,Metabolic pathways|hsa04932,Non-alcoholic fatty liver disease (NAFLD)|hsa05016,Huntington's disease|hsa05010,Alzheimer's disease|hsa05012,Parkinson's disease	http://www.uniprot.org/uniprot/P14854
P07737	1.67675	0.745668	P07737	PFN1	GO:0044238,primary metabolic process|GO:0007599,hemostasis|GO:0080090,regulation of primary metabolic process|GO:0019222,regulation of metabolic process|GO:0007596,blood coagulation|GO:0008064,regulation of actin polymerization or depolymerization|GO:0060491,regulation of cell projection assembly|GO:1901362,organic cyclic compound biosynthetic process|GO:0031344,regulation of cell projection orga…	GO:0043229,intracellular organelle|GO:0043228,non-membrane-bounded organelle|GO:0005924,cell-substrate adherens junction|GO:0005925,focal adhesion|GO:0043227,membrane-bounded organelle|GO:0043226,organelle|GO:0030054,cell junction|GO:0030055,cell-substrate junction|GO:0005856,cytoskeleton|GO:0031982,vesicle|GO:0005615,extracellular space|GO:0005634,nucleus|GO:0016020,membrane|GO:0072562,blood mic…	GO:0019899,enzyme binding|GO:0060590,ATPase regulator activity|GO:0017048,Rho GTPase binding|GO:0031267,small GTPase binding|GO:0051020,GTPase binding|GO:0005488,binding|GO:0003676,nucleic acid binding|GO:0043167,ion binding|GO:1901363,heterocyclic compound binding|GO:1901265,nucleoside phosphate binding|GO:0043168,anion binding|GO:0003779,actin binding|GO:0098772,molecular function regulator|GO:…	hsa05132,Salmonella infection|hsa04015,Rap1 signaling pathway|hsa05131,Shigellosis|hsa04810,Regulation of actin cytoskeleton	http://www.uniprot.org/uniprot/P07737
P39656	1.68405	0.751935	P39656	DDOST	GO:0008104,protein localization|GO:0061024,membrane organization|GO:0071840,cellular component organization or biogenesis|GO:0044710,single-organism metabolic process|GO:0070727,cellular macromolecule localization|GO:0018196,peptidyl-asparagine modification|GO:0043043,peptide biosynthetic process|GO:0018193,peptidyl-amino acid modification|GO:0033036,macromolecule localization|GO:0006605,protein …	GO:0005783,endoplasmic reticulum|GO:0005789,endoplasmic reticulum membrane|GO:0042175,nuclear outer membrane-endoplasmic reticulum membrane network|GO:0043229,intracellular organelle|GO:0043227,membrane-bounded organelle|GO:0043226,organelle|GO:0031224,intrinsic component of membrane|GO:0005737,cytoplasm|GO:0031090,organelle membrane|GO:0016021,integral component of membrane|GO:0016020,membrane|G…	GO:0005515,protein binding|GO:0003824,catalytic activity|GO:0016740,transferase activity|GO:0004576,oligosaccharyl transferase activity|GO:0005488,binding|GO:0016757,transferase activity, transferring glycosyl groups|GO:0016758,transferase activity, transferring hexosyl groups|GO:0004579,dolichyl-diphosphooligosaccharide-protein glycotransferase activity	hsa04141,Protein processing in endoplasmic reticulum|hsa00510,N-Glycan biosynthesis|hsa01100,Metabolic pathways	http://www.uniprot.org/uniprot/P39656
P01766	1.68445	0.752278	P01766	P01766	GO:0006909,phagocytosis|GO:0006950,response to stress|GO:0048584,positive regulation of response to stimulus|GO:0048583,regulation of response to stimulus|GO:0023052,signaling|GO:0007165,signal transduction|GO:0007166,cell surface receptor signaling pathway|GO:0002455,humoral immune response mediated by circulating immunoglobulin|GO:0006955,immune response|GO:0050789,regulation of biological proc…	GO:0043230,extracellular organelle|GO:0031982,vesicle|GO:0044421,extracellular region part|GO:0043227,membrane-bounded organelle|GO:0016020,membrane|GO:0044464,cell part|GO:0005623,cell|GO:0031988,membrane-bounded vesicle|GO:0071944,cell periphery|GO:0005615,extracellular space|GO:0072562,blood microparticle|GO:0005886,plasma membrane|GO:0005576,extracellular region|GO:1903561,extracellular vesic…	GO:0005488,binding|GO:0003823,antigen binding		http://www.uniprot.org/uniprot/P01766
P04179	1.6957	0.761881	P04179	SOD2	GO:2001234,negative regulation of apoptotic signaling pathway|GO:0044238,primary metabolic process|GO:0080090,regulation of primary metabolic process|GO:0019222,regulation of metabolic process|GO:2001233,regulation of apoptotic signaling pathway|GO:0051260,protein homooligomerization|GO:0048585,negative regulation of response to stimulus|GO:0048583,regulation of response to stimulus|GO:0043523,re…	GO:0031974,membrane-enclosed lumen|GO:0043229,intracellular organelle|GO:0043227,membrane-bounded organelle|GO:0043226,organelle|GO:0005737,cytoplasm|GO:0070062,extracellular exosome|GO:0005739,mitochondrion|GO:0031988,membrane-bounded vesicle|GO:0005759,mitochondrial matrix|GO:1903561,extracellular vesicle|GO:0031982,vesicle|GO:0043230,extracellular organelle|GO:0043231,intracellular membrane-bo…	GO:0016721,oxidoreductase activity, acting on superoxide radicals as acceptor|GO:0046914,transition metal ion binding|GO:0043169,cation binding|GO:0016209,antioxidant activity|GO:0030145,manganese ion binding|GO:0043167,ion binding|GO:0003824,catalytic activity|GO:0005488,binding|GO:0005515,protein binding|GO:0004784,superoxide dismutase activity|GO:0046872,metal ion binding|GO:0042802,identical …	hsa05016,Huntington's disease|hsa04068,FoxO signaling pathway|hsa04146,Peroxisome	http://www.uniprot.org/uniprot/P04179
P51659	1.6987	0.764431	P51659	HSD17B4	GO:0034440,lipid oxidation|GO:0060008,Sertoli cell differentiation|GO:0060009,Sertoli cell development|GO:0048468,cell development|GO:0008584,male gonad development|GO:0001503,ossification|GO:0044281,small molecule metabolic process|GO:0044282,small molecule catabolic process|GO:0044283,small molecule biosynthetic process|GO:1901362,organic cyclic compound biosynthetic process|GO:0044255,cellular…	GO:0005782,peroxisomal matrix|GO:0031974,membrane-enclosed lumen|GO:0042579,microbody|GO:0043229,intracellular organelle|GO:0043227,membrane-bounded organelle|GO:0043226,organelle|GO:0005737,cytoplasm|GO:0005778,peroxisomal membrane|GO:0031090,organelle membrane|GO:0098805,whole membrane|GO:0016020,membrane|GO:0005777,peroxisome|GO:0005739,mitochondrion|GO:0031907,microbody lumen|GO:0044439,perox…	GO:0044594,17-beta-hydroxysteroid dehydrogenase (NAD+) activity|GO:0016229,steroid dehydrogenase activity|GO:0005102,receptor binding|GO:0016614,oxidoreductase activity, acting on CH-OH group of donors|GO:0033989,3alpha,7alpha,12alpha-trihydroxy-5beta-cholest-24-enoyl-CoA hydratase activity|GO:0016616,oxidoreductase activity, acting on the CH-OH group of donors, NAD or NADP as acceptor|GO:0016853…	hsa01100,Metabolic pathways|hsa00120,Primary bile acid biosynthesis|hsa04146,Peroxisome	http://www.uniprot.org/uniprot/P51659
P01042	1.71265	0.77623	P01042	KNG1	GO:0007599,hemostasis|GO:0080090,regulation of primary metabolic process|GO:0019222,regulation of metabolic process|GO:0051047,positive regulation of secretion|GO:0051049,regulation of transport|GO:0048585,negative regulation of response to stimulus|GO:0007596,blood coagulation|GO:0048583,regulation of response to stimulus|GO:0032846,positive regulation of homeostatic process|GO:0032844,regulatio…	GO:0005886,plasma membrane|GO:0031974,membrane-enclosed lumen|GO:0043229,intracellular organelle|GO:0071944,cell periphery|GO:0060205,cytoplasmic membrane-bounded vesicle lumen|GO:0043227,membrane-bounded organelle|GO:0043226,organelle|GO:0005737,cytoplasm|GO:0031983,vesicle lumen|GO:0070062,extracellular exosome|GO:0031093,platelet alpha granule lumen|GO:0016023,cytoplasmic membrane-bounded vesi…	GO:0030414,peptidase inhibitor activity|GO:0008270,zinc ion binding|GO:0004857,enzyme inhibitor activity|GO:0098772,molecular function regulator|GO:1901681,sulfur compound binding|GO:0043169,cation binding|GO:0046914,transition metal ion binding|GO:0043167,ion binding|GO:0046872,metal ion binding|GO:0030234,enzyme regulator activity|GO:0043168,anion binding|GO:0061135,endopeptidase regulator acti…	hsa04610,Complement and coagulation cascades	http://www.uniprot.org/uniprot/P01042
Q13867	1.72925	0.790146	Q13867	BLMH	GO:0070647,protein modification by small protein conjugation or removal|GO:0048002,antigen processing and presentation of peptide antigen|GO:0000209,protein polyubiquitination|GO:0044267,cellular protein metabolic process|GO:0044260,cellular macromolecule metabolic process|GO:0032446,protein modification by small protein conjugation|GO:0009636,response to toxic substance|GO:0071704,organic substa…	GO:0031974,membrane-enclosed lumen|GO:0043229,intracellular organelle|GO:0043227,membrane-bounded organelle|GO:0043226,organelle|GO:0005737,cytoplasm|GO:0070062,extracellular exosome|GO:0031981,nuclear lumen|GO:0005634,nucleus|GO:0031988,membrane-bounded vesicle|GO:0005654,nucleoplasm|GO:1903561,extracellular vesicle|GO:0031982,vesicle|GO:0043230,extracellular organelle|GO:0043231,intracellular m…	GO:0004177,aminopeptidase activity|GO:0004175,endopeptidase activity|GO:0016787,hydrolase activity|GO:0003824,catalytic activity|GO:0004180,carboxypeptidase activity|GO:0070011,peptidase activity, acting on L-amino acid peptides|GO:0008238,exopeptidase activity|GO:0004197,cysteine-type endopeptidase activity|GO:0005488,binding|GO:0005515,protein binding|GO:0008233,peptidase activity|GO:0008234,cy…		http://www.uniprot.org/uniprot/Q13867
P13716	1.7567	0.812868	P13716	ALAD	GO:0032025,response to cobalt ion|GO:0009636,response to toxic substance|GO:0006778,porphyrin-containing compound metabolic process|GO:0006779,porphyrin-containing compound biosynthetic process|GO:0044281,small molecule metabolic process|GO:0010043,response to zinc ion|GO:1901362,organic cyclic compound biosynthetic process|GO:0071840,cellular component organization or biogenesis|GO:0010044,respo…	GO:0043229,intracellular organelle|GO:0043227,membrane-bounded organelle|GO:0043226,organelle|GO:0005737,cytoplasm|GO:0031982,vesicle|GO:0005634,nucleus|GO:0031988,membrane-bounded vesicle|GO:1903561,extracellular vesicle|GO:0005615,extracellular space|GO:0043230,extracellular organelle|GO:0043231,intracellular membrane-bounded organelle|GO:0070062,extracellular exosome|GO:0005829,cytosol|GO:0044…	GO:0043169,cation binding|GO:0046914,transition metal ion binding|GO:0016835,carbon-oxygen lyase activity|GO:0004655,porphobilinogen synthase activity|GO:0032791,lead ion binding|GO:0043167,ion binding|GO:0003824,catalytic activity|GO:0008270,zinc ion binding|GO:0005515,protein binding|GO:0016836,hydro-lyase activity|GO:0046872,metal ion binding|GO:0016829,lyase activity|GO:0042802,identical prot…	hsa00860,Porphyrin and chlorophyll metabolism|hsa01100,Metabolic pathways	http://www.uniprot.org/uniprot/P13716
P61158	1.7894	0.839476	P61158	ACTR3	GO:0006909,phagocytosis|GO:0048584,positive regulation of response to stimulus|GO:0048583,regulation of response to stimulus|GO:0008064,regulation of actin polymerization or depolymerization|GO:0007163,establishment or maintenance of cell polarity|GO:0007165,signal transduction|GO:0007166,cell surface receptor signaling pathway|GO:0007167,enzyme linked receptor protein signaling pathway|GO:003018…	GO:0015629,actin cytoskeleton|GO:0043229,intracellular organelle|GO:0043228,non-membrane-bounded organelle|GO:0005924,cell-substrate adherens junction|GO:0005925,focal adhesion|GO:0043227,membrane-bounded organelle|GO:0043226,organelle|GO:0030054,cell junction|GO:0030055,cell-substrate junction|GO:0005856,cytoskeleton|GO:0042995,cell projection|GO:0031982,vesicle|GO:0016020,membrane|GO:0031988,me…	GO:0005200,structural constituent of cytoskeleton|GO:0035639,purine ribonucleoside triphosphate binding|GO:0044877,macromolecular complex binding|GO:0005488,binding|GO:0005198,structural molecule activity|GO:1901363,heterocyclic compound binding|GO:1901265,nucleoside phosphate binding|GO:0001882,nucleoside binding|GO:0043168,anion binding|GO:0043167,ion binding|GO:0003779,actin binding|GO:0001883…		http://www.uniprot.org/uniprot/P61158
P47756	1.79205	0.841611	P47756	CAPZB	GO:0007599,hemostasis|GO:0007596,blood coagulation|GO:0008064,regulation of actin polymerization or depolymerization|GO:0060491,regulation of cell projection assembly|GO:0090066,regulation of anatomical structure size|GO:0031345,negative regulation of cell projection organization|GO:0031344,regulation of cell projection organization|GO:0071840,cellular component organization or biogenesis|GO:0048…	GO:0015629,actin cytoskeleton|GO:0030016,myofibril|GO:0030017,sarcomere|GO:0043229,intracellular organelle|GO:0043228,non-membrane-bounded organelle|GO:0043227,membrane-bounded organelle|GO:0043226,organelle|GO:0005856,cytoskeleton|GO:0031982,vesicle|GO:0031988,membrane-bounded vesicle|GO:0044430,cytoskeletal part|GO:0005737,cytoplasm|GO:0044424,intracellular part|GO:0005884,actin filament|GO:003…	GO:0008092,cytoskeletal protein binding|GO:0051015,actin filament binding|GO:0003779,actin binding|GO:0044877,macromolecular complex binding|GO:0005488,binding|GO:0005515,protein binding|GO:0032403,protein complex binding	hsa04144,Endocytosis	http://www.uniprot.org/uniprot/P47756
P01876	1.8297	0.871607	P01876	IGHA1	GO:0060263,regulation of respiratory burst|GO:0009893,positive regulation of metabolic process|GO:0019222,regulation of metabolic process|GO:0060267,positive regulation of respiratory burst|GO:0019730,antimicrobial humoral response|GO:0042592,homeostatic process|GO:0003014,renal system process|GO:0042742,defense response to bacterium|GO:0006959,humoral immune response|GO:0050789,regulation of bio…	GO:0042571,immunoglobulin complex, circulating|GO:0019814,immunoglobulin complex|GO:0043227,membrane-bounded organelle|GO:0043226,organelle|GO:0031982,vesicle|GO:0072562,blood microparticle|GO:0031988,membrane-bounded vesicle|GO:0071749,polymeric IgA immunoglobulin complex|GO:0071748,monomeric IgA immunoglobulin complex|GO:0071745,IgA immunoglobulin complex|GO:0071746,IgA immunoglobulin complex, …	GO:0003823,antigen binding|GO:0005488,binding|GO:0005515,protein binding|GO:0034987,immunoglobulin receptor binding|GO:0005102,receptor binding		http://www.uniprot.org/uniprot/P01876
P02776	1.8838	0.913646	P02776	PF4	GO:2001234,negative regulation of apoptotic signaling pathway|GO:2001236,regulation of extrinsic apoptotic signaling pathway|GO:2001237,negative regulation of extrinsic apoptotic signaling pathway|GO:0019220,regulation of phosphate metabolic process|GO:0019221,cytokine-mediated signaling pathway|GO:0019222,regulation of metabolic process|GO:2001233,regulation of apoptotic signaling pathway|GO:003…	GO:0031974,membrane-enclosed lumen|GO:0043229,intracellular organelle|GO:0060205,cytoplasmic membrane-bounded vesicle lumen|GO:0043227,membrane-bounded organelle|GO:0043226,organelle|GO:0005737,cytoplasm|GO:0031983,vesicle lumen|GO:0031982,vesicle|GO:0031093,platelet alpha granule lumen|GO:0016023,cytoplasmic membrane-bounded vesicle|GO:0031410,cytoplasmic vesicle|GO:0031988,membrane-bounded vesi…	GO:1901681,sulfur compound binding|GO:0043168,anion binding|GO:0042379,chemokine receptor binding|GO:0008009,chemokine activity|GO:0097367,carbohydrate derivative binding|GO:0005102,receptor binding|GO:0043167,ion binding|GO:0005539,glycosaminoglycan binding|GO:0005125,cytokine activity|GO:0048248,CXCR3 chemokine receptor binding|GO:0005488,binding|GO:0005515,protein binding|GO:0045236,CXCR chemo…	hsa04062,Chemokine signaling pathway|hsa04060,Cytokine-cytokine receptor interaction	http://www.uniprot.org/uniprot/P02776
P61160	1.90255	0.927934	P61160	ACTR2	GO:0006909,phagocytosis|GO:0048584,positive regulation of response to stimulus|GO:0048583,regulation of response to stimulus|GO:0008064,regulation of actin polymerization or depolymerization|GO:0007163,establishment or maintenance of cell polarity|GO:0007165,signal transduction|GO:0007166,cell surface receptor signaling pathway|GO:0007167,enzyme linked receptor protein signaling pathway|GO:003018…	GO:0015629,actin cytoskeleton|GO:0043229,intracellular organelle|GO:0043228,non-membrane-bounded organelle|GO:0005924,cell-substrate adherens junction|GO:0005925,focal adhesion|GO:0043227,membrane-bounded organelle|GO:0043226,organelle|GO:0030054,cell junction|GO:0030055,cell-substrate junction|GO:0005856,cytoskeleton|GO:0042995,cell projection|GO:0031982,vesicle|GO:0016020,membrane|GO:0031988,me…	GO:0005200,structural constituent of cytoskeleton|GO:0035639,purine ribonucleoside triphosphate binding|GO:0044877,macromolecular complex binding|GO:0005488,binding|GO:0005198,structural molecule activity|GO:1901363,heterocyclic compound binding|GO:1901265,nucleoside phosphate binding|GO:0001882,nucleoside binding|GO:0043168,anion binding|GO:0043167,ion binding|GO:0003779,actin binding|GO:0001883…		http://www.uniprot.org/uniprot/P61160
O75964	1.9338	0.951439	O75964	ATP5L	GO:0009167,purine ribonucleoside monophosphate metabolic process|GO:0009165,nucleotide biosynthetic process|GO:0009163,nucleoside biosynthetic process|GO:0009161,ribonucleoside monophosphate metabolic process|GO:1901362,organic cyclic compound biosynthetic process|GO:0042451,purine nucleoside biosynthetic process|GO:0009168,purine ribonucleoside monophosphate biosynthetic process|GO:0044710,singl…	GO:0044464,cell part|GO:0031975,envelope|GO:0043229,intracellular organelle|GO:0031988,membrane-bounded vesicle|GO:0043227,membrane-bounded organelle|GO:0043226,organelle|GO:0005737,cytoplasm|GO:0045263,proton-transporting ATP synthase complex, coupling factor F(o)|GO:0031982,vesicle|GO:0098796,membrane protein complex|GO:0016020,membrane|GO:0044444,cytoplasmic part|GO:0005739,mitochondrion|GO:00…	GO:0022891,substrate-specific transmembrane transporter activity|GO:0022890,inorganic cation transmembrane transporter activity|GO:0016818,hydrolase activity, acting on acid anhydrides, in phosphorus-containing anhydrides|GO:0022892,substrate-specific transporter activity|GO:0016787,hydrolase activity|GO:0005215,transporter activity|GO:0003824,catalytic activity|GO:0008324,cation transmembrane tr…	hsa01100,Metabolic pathways|hsa00190,Oxidative phosphorylation	http://www.uniprot.org/uniprot/O75964
P01024	1.9364	0.953377	P01024	C3	GO:0032026,response to magnesium ion|GO:0019220,regulation of phosphate metabolic process|GO:0080090,regulation of primary metabolic process|GO:0019222,regulation of metabolic process|GO:0048589,developmental growth|GO:0051049,regulation of transport|GO:0048584,positive regulation of response to stimulus|GO:0048583,regulation of response to stimulus|GO:0002437,inflammatory response to antigenic s…	GO:0043230,extracellular organelle|GO:0031982,vesicle|GO:0044421,extracellular region part|GO:0043227,membrane-bounded organelle|GO:0016020,membrane|GO:0044464,cell part|GO:0005623,cell|GO:0031988,membrane-bounded vesicle|GO:0071944,cell periphery|GO:0005615,extracellular space|GO:0072562,blood microparticle|GO:0005886,plasma membrane|GO:0005576,extracellular region|GO:1903561,extracellular vesic…	GO:0005102,receptor binding|GO:0004866,endopeptidase inhibitor activity|GO:0061135,endopeptidase regulator activity|GO:0061134,peptidase regulator activity|GO:0008289,lipid binding|GO:0031714,C5a anaphylatoxin chemotactic receptor binding|GO:0048037,cofactor binding|GO:0005515,protein binding|GO:0030414,peptidase inhibitor activity|GO:0031715,C5L2 anaphylatoxin chemotactic receptor binding|GO:000…	hsa05133,Pertussis|hsa04610,Complement and coagulation cascades|hsa05134,Legionellosis|hsa05322,Systemic lupus erythematosus|hsa05203,Viral carcinogenesis|hsa05142,Chagas disease (American trypanosomiasis)|hsa05140,Leishmaniasis|hsa04145,Phagosome|hsa05150,Staphylococcus aureus infection|hsa05152,Tuberculosis|hsa05168,Herpes simplex infection	http://www.uniprot.org/uniprot/P01024
P01008	1.9381	0.954643	P01008	SERPINC1	GO:0006954,inflammatory response|GO:0009991,response to extracellular stimulus|GO:0009892,negative regulation of metabolic process|GO:0080090,regulation of primary metabolic process|GO:0019222,regulation of metabolic process|GO:0032101,regulation of response to external stimulus|GO:0050896,response to stimulus|GO:2000266,regulation of blood coagulation, intrinsic pathway|GO:0031324,negative regul…	GO:0043230,extracellular organelle|GO:0031982,vesicle|GO:0044421,extracellular region part|GO:0043227,membrane-bounded organelle|GO:0016020,membrane|GO:0044464,cell part|GO:0005623,cell|GO:0031988,membrane-bounded vesicle|GO:0071944,cell periphery|GO:0005615,extracellular space|GO:0072562,blood microparticle|GO:0005886,plasma membrane|GO:0005576,extracellular region|GO:1903561,extracellular vesic…	GO:1901681,sulfur compound binding|GO:0043168,anion binding|GO:0004866,endopeptidase inhibitor activity|GO:0097367,carbohydrate derivative binding|GO:0061135,endopeptidase regulator activity|GO:0061134,peptidase regulator activity|GO:0019899,enzyme binding|GO:0008201,heparin binding|GO:0005539,glycosaminoglycan binding|GO:0043167,ion binding|GO:0002020,protease binding|GO:0005515,protein binding|…	hsa04610,Complement and coagulation cascades	http://www.uniprot.org/uniprot/P01008
P02787	1.95275	0.965507	P02787	TF	GO:0006887,exocytosis|GO:0019220,regulation of phosphate metabolic process|GO:0080090,regulation of primary metabolic process|GO:0019222,regulation of metabolic process|GO:0060249,anatomical structure homeostasis|GO:0048584,positive regulation of response to stimulus|GO:0048583,regulation of response to stimulus|GO:0032147,activation of protein kinase activity|GO:0032844,regulation of homeostatic…	GO:0098590,plasma membrane region|GO:0016020,membrane|GO:0044421,extracellular region part|GO:0055037,recycling endosome|GO:1990712,HFE-transferrin receptor complex|GO:0031974,membrane-enclosed lumen|GO:0045178,basal part of cell|GO:0030139,endocytic vesicle|GO:0043229,intracellular organelle|GO:0071944,cell periphery|GO:0005905,coated pit|GO:0060205,cytoplasmic membrane-bounded vesicle lumen|GO:…	GO:1990459,transferrin receptor binding|GO:0005488,binding|GO:0043169,cation binding|GO:0046914,transition metal ion binding|GO:0046915,transition metal ion transmembrane transporter activity|GO:0043167,ion binding|GO:0046873,metal ion transmembrane transporter activity|GO:0046872,metal ion binding|GO:0005215,transporter activity|GO:0008324,cation transmembrane transporter activity|GO:0008199,fer…	hsa04066,HIF-1 signaling pathway|hsa04978,Mineral absorption	http://www.uniprot.org/uniprot/P02787
P24557	1.9608	0.971442	P24557	TBXAS1	GO:0006633,fatty acid biosynthetic process|GO:0006631,fatty acid metabolic process|GO:0006636,unsaturated fatty acid biosynthetic process|GO:0019752,carboxylic acid metabolic process|GO:0043436,oxoacid metabolic process|GO:0009410,response to xenobiotic stimulus|GO:0044281,small molecule metabolic process|GO:0070887,cellular response to chemical stimulus|GO:0044283,small molecule biosynthetic pro…	GO:0005783,endoplasmic reticulum|GO:0005789,endoplasmic reticulum membrane|GO:0042175,nuclear outer membrane-endoplasmic reticulum membrane network|GO:0043229,intracellular organelle|GO:0043227,membrane-bounded organelle|GO:0043226,organelle|GO:0031224,intrinsic component of membrane|GO:0005737,cytoplasm|GO:0031090,organelle membrane|GO:0016021,integral component of membrane|GO:0016020,membrane|G…	GO:0043169,cation binding|GO:0004497,monooxygenase activity|GO:0046872,metal ion binding|GO:0016853,isomerase activity|GO:0020037,heme binding|GO:0046906,tetrapyrrole binding|GO:0097159,organic cyclic compound binding|GO:0016705,oxidoreductase activity, acting on paired donors, with incorporation or reduction of molecular oxygen|GO:0046914,transition metal ion binding|GO:0003824,catalytic activit…	hsa00590,Arachidonic acid metabolism|hsa04611,Platelet activation|hsa01100,Metabolic pathways	http://www.uniprot.org/uniprot/P24557
P25705	1.96655	0.975667	P25705	ATP5A1	GO:0050680,negative regulation of epithelial cell proliferation|GO:0009167,purine ribonucleoside monophosphate metabolic process|GO:0009165,nucleotide biosynthetic process|GO:0009163,nucleoside biosynthetic process|GO:0009161,ribonucleoside monophosphate metabolic process|GO:1901362,organic cyclic compound biosynthetic process|GO:0042451,purine nucleoside biosynthetic process|GO:0009168,purine ri…	GO:0098796,membrane protein complex|GO:0044464,cell part|GO:0031974,membrane-enclosed lumen|GO:0031975,envelope|GO:0043229,intracellular organelle|GO:0071944,cell periphery|GO:0031988,membrane-bounded vesicle|GO:0043227,membrane-bounded organelle|GO:0043226,organelle|GO:0008180,COP9 signalosome|GO:0045261,proton-transporting ATP synthase complex, catalytic core F(1)|GO:0033178,proton-transporting…	GO:0042287,MHC protein binding|GO:0003676,nucleic acid binding|GO:0035639,purine ribonucleoside triphosphate binding|GO:0036442,hydrogen-exporting ATPase activity|GO:0005488,binding|GO:0016887,ATPase activity|GO:0000166,nucleotide binding|GO:1901363,heterocyclic compound binding|GO:0032550,purine ribonucleoside binding|GO:0001882,nucleoside binding|GO:0043168,anion binding|GO:0042625,ATPase activ…	hsa05016,Huntington's disease|hsa01100,Metabolic pathways|hsa05010,Alzheimer's disease|hsa05012,Parkinson's disease|hsa00190,Oxidative phosphorylation	http://www.uniprot.org/uniprot/P25705
P56385	1.96715	0.976107	P56385	ATP5I	GO:0009167,purine ribonucleoside monophosphate metabolic process|GO:0009165,nucleotide biosynthetic process|GO:0009163,nucleoside biosynthetic process|GO:0009161,ribonucleoside monophosphate metabolic process|GO:1901362,organic cyclic compound biosynthetic process|GO:0042451,purine nucleoside biosynthetic process|GO:0009168,purine ribonucleoside monophosphate biosynthetic process|GO:0044710,singl…	GO:0044464,cell part|GO:0031975,envelope|GO:0043229,intracellular organelle|GO:0043227,membrane-bounded organelle|GO:0043226,organelle|GO:0005737,cytoplasm|GO:0045263,proton-transporting ATP synthase complex, coupling factor F(o)|GO:0031090,organelle membrane|GO:0098796,membrane protein complex|GO:0016020,membrane|GO:0044444,cytoplasmic part|GO:0005739,mitochondrion|GO:0098800,inner mitochondrial…	GO:0022891,substrate-specific transmembrane transporter activity|GO:0022890,inorganic cation transmembrane transporter activity|GO:0016818,hydrolase activity, acting on acid anhydrides, in phosphorus-containing anhydrides|GO:0022892,substrate-specific transporter activity|GO:0016787,hydrolase activity|GO:0005215,transporter activity|GO:0003824,catalytic activity|GO:0008324,cation transmembrane tr…	hsa01100,Metabolic pathways|hsa00190,Oxidative phosphorylation	http://www.uniprot.org/uniprot/P56385
P40926	1.977	0.983313	P40926	MDH2	GO:0044238,primary metabolic process|GO:0019674,NAD metabolic process|GO:0006732,coenzyme metabolic process|GO:0046364,monosaccharide biosynthetic process|GO:0006473,protein acetylation|GO:0006475,internal protein amino acid acetylation|GO:0019752,carboxylic acid metabolic process|GO:0044723,single-organism carbohydrate metabolic process|GO:0006099,tricarboxylic acid cycle|GO:0009060,aerobic resp…	GO:0044464,cell part|GO:0031974,membrane-enclosed lumen|GO:0031975,envelope|GO:0043229,intracellular organelle|GO:0071944,cell periphery|GO:0043227,membrane-bounded organelle|GO:0043226,organelle|GO:0005737,cytoplasm|GO:0070062,extracellular exosome|GO:0031981,nuclear lumen|GO:0005743,mitochondrial inner membrane|GO:0043209,myelin sheath|GO:0005634,nucleus|GO:0016020,membrane|GO:0044444,cytoplasm…	GO:0005488,binding|GO:0016614,oxidoreductase activity, acting on CH-OH group of donors|GO:0016615,malate dehydrogenase activity|GO:0016616,oxidoreductase activity, acting on the CH-OH group of donors, NAD or NADP as acceptor|GO:0043621,protein self-association|GO:0097159,organic cyclic compound binding|GO:0044822,poly(A) RNA binding|GO:0005515,protein binding|GO:0003824,catalytic activity|GO:0030…	hsa00620,Pyruvate metabolism|hsa01100,Metabolic pathways|hsa00630,Glyoxylate and dicarboxylate metabolism|hsa01200,Carbon metabolism|hsa01130,Biosynthesis of antibiotics|hsa00270,Cysteine and methionine metabolism|hsa00020,Citrate cycle (TCA cycle)	http://www.uniprot.org/uniprot/P40926
O15145	2.00065	1.00047	O15145	ARPC3	GO:0006909,phagocytosis|GO:0048584,positive regulation of response to stimulus|GO:0048583,regulation of response to stimulus|GO:0008064,regulation of actin polymerization or depolymerization|GO:0007165,signal transduction|GO:0007166,cell surface receptor signaling pathway|GO:0007167,enzyme linked receptor protein signaling pathway|GO:0030182,neuron differentiation|GO:0007169,transmembrane recepto…	GO:0015629,actin cytoskeleton|GO:0043229,intracellular organelle|GO:0043228,non-membrane-bounded organelle|GO:0005924,cell-substrate adherens junction|GO:0005925,focal adhesion|GO:0043227,membrane-bounded organelle|GO:0043226,organelle|GO:0030054,cell junction|GO:0030055,cell-substrate junction|GO:0005856,cytoskeleton|GO:0042995,cell projection|GO:0031982,vesicle|GO:0016020,membrane|GO:0031988,me…	GO:0005200,structural constituent of cytoskeleton|GO:0008092,cytoskeletal protein binding|GO:0051015,actin filament binding|GO:0005198,structural molecule activity|GO:0003779,actin binding|GO:0044877,macromolecular complex binding|GO:0005488,binding|GO:0005515,protein binding|GO:0032403,protein complex binding	hsa05132,Salmonella infection|hsa05131,Shigellosis|hsa05130,Pathogenic Escherichia coli infection|hsa05100,Bacterial invasion of epithelial cells|hsa04144,Endocytosis|hsa04666,Fc gamma R-mediated phagocytosis|hsa04810,Regulation of actin cytoskeleton	http://www.uniprot.org/uniprot/O15145
P30405	2.00065	1.00047	P30405	PPIF	GO:2001234,negative regulation of apoptotic signaling pathway|GO:2001235,positive regulation of apoptotic signaling pathway|GO:0019220,regulation of phosphate metabolic process|GO:0080090,regulation of primary metabolic process|GO:0019222,regulation of metabolic process|GO:2001233,regulation of apoptotic signaling pathway|GO:0051049,regulation of transport|GO:0048585,negative regulation of respon…	GO:0098796,membrane protein complex|GO:0044464,cell part|GO:0031974,membrane-enclosed lumen|GO:0031975,envelope|GO:0043229,intracellular organelle|GO:0043227,membrane-bounded organelle|GO:0043226,organelle|GO:0005737,cytoplasm|GO:0031090,organelle membrane|GO:0005743,mitochondrial inner membrane|GO:0016020,membrane|GO:0044444,cytoplasmic part|GO:0005739,mitochondrion|GO:0098800,inner mitochondria…	GO:0042277,peptide binding|GO:0016853,isomerase activity|GO:0033218,amide binding|GO:0008144,drug binding|GO:0003824,catalytic activity|GO:0005515,protein binding|GO:0003755,peptidyl-prolyl cis-trans isomerase activity|GO:0016018,cyclosporin A binding|GO:0016859,cis-trans isomerase activity|GO:0005488,binding	hsa04022,cGMP-PKG signaling pathway|hsa04020,Calcium signaling pathway|hsa05016,Huntington's disease|hsa05012,Parkinson's disease|hsa05145,Toxoplasmosis	http://www.uniprot.org/uniprot/P30405
O15143	2.01445	1.01039	O15143	ARPC1B	GO:0022607,cellular component assembly|GO:0033043,regulation of organelle organization|GO:0043933,macromolecular complex subunit organization|GO:0030036,actin cytoskeleton organization|GO:0051128,regulation of cellular component organization|GO:0008064,regulation of actin polymerization or depolymerization|GO:0034314,Arp2/3 complex-mediated actin nucleation|GO:0034622,cellular macromolecular comp…	GO:0015629,actin cytoskeleton|GO:0043229,intracellular organelle|GO:0043228,non-membrane-bounded organelle|GO:0005924,cell-substrate adherens junction|GO:0005925,focal adhesion|GO:0043227,membrane-bounded organelle|GO:0043226,organelle|GO:0030054,cell junction|GO:0030055,cell-substrate junction|GO:0005856,cytoskeleton|GO:0031982,vesicle|GO:0031988,membrane-bounded vesicle|GO:0044430,cytoskeletal …	GO:0005200,structural constituent of cytoskeleton|GO:0008092,cytoskeletal protein binding|GO:0051015,actin filament binding|GO:0005198,structural molecule activity|GO:0003779,actin binding|GO:0044877,macromolecular complex binding|GO:0005488,binding|GO:0005515,protein binding|GO:0032403,protein complex binding	hsa05132,Salmonella infection|hsa05131,Shigellosis|hsa05130,Pathogenic Escherichia coli infection|hsa05100,Bacterial invasion of epithelial cells|hsa04144,Endocytosis|hsa04666,Fc gamma R-mediated phagocytosis|hsa04810,Regulation of actin cytoskeleton	http://www.uniprot.org/uniprot/O15143
P48047	2.02925	1.02095	P48047	ATP5O	GO:0009167,purine ribonucleoside monophosphate metabolic process|GO:0009165,nucleotide biosynthetic process|GO:0009163,nucleoside biosynthetic process|GO:0009161,ribonucleoside monophosphate metabolic process|GO:1901362,organic cyclic compound biosynthetic process|GO:0042451,purine nucleoside biosynthetic process|GO:0009168,purine ribonucleoside monophosphate biosynthetic process|GO:0044710,singl…	GO:0044464,cell part|GO:0031975,envelope|GO:0043229,intracellular organelle|GO:0071944,cell periphery|GO:0031988,membrane-bounded vesicle|GO:0043227,membrane-bounded organelle|GO:0043226,organelle|GO:0005737,cytoplasm|GO:0031090,organelle membrane|GO:0098796,membrane protein complex|GO:0005634,nucleus|GO:0016020,membrane|GO:0044444,cytoplasmic part|GO:0005739,mitochondrion|GO:0098800,inner mitoch…	GO:0008144,drug binding|GO:0005488,binding|GO:0016887,ATPase activity|GO:0042625,ATPase activity, coupled to transmembrane movement of ions|GO:0042626,ATPase activity, coupled to transmembrane movement of substances|GO:0016820,hydrolase activity, acting on acid anhydrides, catalyzing transmembrane movement of substances|GO:0046933,proton-transporting ATP synthase activity, rotational mechanism|GO…	hsa05016,Huntington's disease|hsa01100,Metabolic pathways|hsa05010,Alzheimer's disease|hsa05012,Parkinson's disease|hsa00190,Oxidative phosphorylation	http://www.uniprot.org/uniprot/P48047
P01861	2.0376	1.02687	P01861	IGHG4	GO:0044238,primary metabolic process|GO:0006909,phagocytosis|GO:0006950,response to stress|GO:0048584,positive regulation of response to stimulus|GO:0048583,regulation of response to stimulus|GO:0023052,signaling|GO:0007165,signal transduction|GO:0007166,cell surface receptor signaling pathway|GO:0002455,humoral immune response mediated by circulating immunoglobulin|GO:0050789,regulation of biolo…	GO:0043230,extracellular organelle|GO:0031982,vesicle|GO:0044421,extracellular region part|GO:0043227,membrane-bounded organelle|GO:0072562,blood microparticle|GO:0031988,membrane-bounded vesicle|GO:0005576,extracellular region|GO:0005615,extracellular space|GO:1903561,extracellular vesicle|GO:0065010,extracellular membrane-bounded organelle|GO:0043226,organelle|GO:0070062,extracellular exosome	GO:0005488,binding|GO:0003823,antigen binding		http://www.uniprot.org/uniprot/P01861
O15511	2.0637	1.04523	O15511	ARPC5	GO:0006909,phagocytosis|GO:0048584,positive regulation of response to stimulus|GO:0048583,regulation of response to stimulus|GO:0008064,regulation of actin polymerization or depolymerization|GO:0007165,signal transduction|GO:0007166,cell surface receptor signaling pathway|GO:0007167,enzyme linked receptor protein signaling pathway|GO:0030182,neuron differentiation|GO:0007169,transmembrane recepto…	GO:0015629,actin cytoskeleton|GO:0043229,intracellular organelle|GO:0043228,non-membrane-bounded organelle|GO:0005924,cell-substrate adherens junction|GO:0005925,focal adhesion|GO:0043227,membrane-bounded organelle|GO:0043226,organelle|GO:0030054,cell junction|GO:0030055,cell-substrate junction|GO:0005856,cytoskeleton|GO:0042995,cell projection|GO:0031982,vesicle|GO:0031988,membrane-bounded vesic…	GO:0005200,structural constituent of cytoskeleton|GO:0008092,cytoskeletal protein binding|GO:0051015,actin filament binding|GO:0005198,structural molecule activity|GO:0003779,actin binding|GO:0044877,macromolecular complex binding|GO:0005488,binding|GO:0005515,protein binding|GO:0032403,protein complex binding	hsa05132,Salmonella infection|hsa05131,Shigellosis|hsa05130,Pathogenic Escherichia coli infection|hsa05100,Bacterial invasion of epithelial cells|hsa04144,Endocytosis|hsa04666,Fc gamma R-mediated phagocytosis|hsa04810,Regulation of actin cytoskeleton	http://www.uniprot.org/uniprot/O15511
P18136	2.07155	1.05071	P18136	P18136	GO:0009607,response to biotic stimulus|GO:0006909,phagocytosis|GO:0019730,antimicrobial humoral response|GO:0019731,antibacterial humoral response|GO:0006950,response to stress|GO:0048584,positive regulation of response to stimulus|GO:0048583,regulation of response to stimulus|GO:0023052,signaling|GO:0007165,signal transduction|GO:0007166,cell surface receptor signaling pathway|GO:0002455,humoral…	GO:0071944,cell periphery|GO:0042571,immunoglobulin complex, circulating|GO:0019814,immunoglobulin complex|GO:0005615,extracellular space|GO:0016020,membrane|GO:0072562,blood microparticle|GO:0071749,polymeric IgA immunoglobulin complex|GO:0071748,monomeric IgA immunoglobulin complex|GO:0071745,IgA immunoglobulin complex|GO:0071746,IgA immunoglobulin complex, circulating|GO:0005886,plasma membran…	GO:0003823,antigen binding|GO:0005488,binding|GO:0005515,protein binding|GO:0034987,immunoglobulin receptor binding|GO:0005102,receptor binding		http://www.uniprot.org/uniprot/P18136
P00738	2.07445	1.05273	P00738	HP	GO:0044710,single-organism metabolic process|GO:0009607,response to biotic stimulus|GO:0009894,regulation of catabolic process|GO:0009895,negative regulation of catabolic process|GO:0009892,negative regulation of metabolic process|GO:0006954,inflammatory response|GO:0019222,regulation of metabolic process|GO:0048585,negative regulation of response to stimulus|GO:0031324,negative regulation of cel…	GO:0031974,membrane-enclosed lumen|GO:0030139,endocytic vesicle|GO:0043229,intracellular organelle|GO:0060205,cytoplasmic membrane-bounded vesicle lumen|GO:0043227,membrane-bounded organelle|GO:0043226,organelle|GO:0005737,cytoplasm|GO:0031983,vesicle lumen|GO:0070062,extracellular exosome|GO:0071682,endocytic vesicle lumen|GO:0016023,cytoplasmic membrane-bounded vesicle|GO:0031410,cytoplasmic ve…	GO:0030492,hemoglobin binding|GO:0016209,antioxidant activity|GO:0005488,binding|GO:0005515,protein binding		http://www.uniprot.org/uniprot/P00738
P01857	2.07635	1.05405	P01857	IGHG1	GO:0044238,primary metabolic process|GO:0006909,phagocytosis|GO:0006950,response to stress|GO:0048584,positive regulation of response to stimulus|GO:0048583,regulation of response to stimulus|GO:0023052,signaling|GO:0007165,signal transduction|GO:0007166,cell surface receptor signaling pathway|GO:0002455,humoral immune response mediated by circulating immunoglobulin|GO:0050789,regulation of biolo…	GO:0043230,extracellular organelle|GO:0031982,vesicle|GO:0044421,extracellular region part|GO:0043227,membrane-bounded organelle|GO:0072562,blood microparticle|GO:0031988,membrane-bounded vesicle|GO:0005576,extracellular region|GO:0005615,extracellular space|GO:1903561,extracellular vesicle|GO:0065010,extracellular membrane-bounded organelle|GO:0043226,organelle|GO:0070062,extracellular exosome	GO:0005515,protein binding|GO:0003823,antigen binding|GO:0005488,binding		http://www.uniprot.org/uniprot/P01857
P52907	2.08935	1.06305	P52907	CAPZA1	GO:0022607,cellular component assembly|GO:0007599,hemostasis|GO:0033043,regulation of organelle organization|GO:0043933,macromolecular complex subunit organization|GO:0050896,response to stimulus|GO:1901879,regulation of protein depolymerization|GO:0051129,negative regulation of cellular component organization|GO:0051128,regulation of cellular component organization|GO:0008064,regulation of actin…	GO:0015629,actin cytoskeleton|GO:0043229,intracellular organelle|GO:0043228,non-membrane-bounded organelle|GO:0043227,membrane-bounded organelle|GO:0043226,organelle|GO:0030054,cell junction|GO:0005856,cytoskeleton|GO:0031982,vesicle|GO:0016020,membrane|GO:0031988,membrane-bounded vesicle|GO:0044430,cytoskeletal part|GO:0005576,extracellular region|GO:0005737,cytoplasm|GO:0005938,cell cortex|GO:0…	GO:0008092,cytoskeletal protein binding|GO:0051015,actin filament binding|GO:0003779,actin binding|GO:0044877,macromolecular complex binding|GO:0005488,binding|GO:0005515,protein binding|GO:0032403,protein complex binding	hsa04144,Endocytosis	http://www.uniprot.org/uniprot/P52907
P62942	2.09825	1.06919	P62942	FKBP1A	GO:0044238,primary metabolic process|GO:0032924,activin receptor signaling pathway|GO:0032925,regulation of activin receptor signaling pathway|GO:0019222,regulation of metabolic process|GO:0051049,regulation of transport|GO:0032386,regulation of intracellular transport|GO:0048584,positive regulation of response to stimulus|GO:0051282,regulation of sequestering of calcium ion|GO:0051283,negative r…	GO:0005783,endoplasmic reticulum|GO:0005789,endoplasmic reticulum membrane|GO:0030016,myofibril|GO:0030017,sarcomere|GO:0043229,intracellular organelle|GO:0043228,non-membrane-bounded organelle|GO:0005623,cell|GO:0043227,membrane-bounded organelle|GO:0043226,organelle|GO:0030018,Z disc|GO:0005737,cytoplasm|GO:0031984,organelle subcompartment|GO:0070062,extracellular exosome|GO:0016020,membrane|GO…	GO:0005126,cytokine receptor binding|GO:0005160,transforming growth factor beta receptor binding|GO:0008144,drug binding|GO:0060089,molecular transducer activity|GO:0044877,macromolecular complex binding|GO:0005488,binding|GO:0004871,signal transducer activity|GO:0044325,ion channel binding|GO:0098772,molecular function regulator|GO:1901363,heterocyclic compound binding|GO:0019855,calcium channel…		http://www.uniprot.org/uniprot/P62942
P02652	2.15775	1.10953	P02652	APOA2	GO:1901566,organonitrogen compound biosynthetic process|GO:0008104,protein localization|GO:0080090,regulation of primary metabolic process|GO:0019222,regulation of metabolic process|GO:0046340,diacylglycerol catabolic process|GO:0051048,negative regulation of secretion|GO:0051049,regulation of transport|GO:0048585,negative regulation of response to stimulus|GO:0048583,regulation of response to st…	GO:0005783,endoplasmic reticulum|GO:0044421,extracellular region part|GO:0031974,membrane-enclosed lumen|GO:0043229,intracellular organelle|GO:1990777,lipoprotein particle|GO:0005622,intracellular|GO:0043227,membrane-bounded organelle|GO:0043226,organelle|GO:0034358,plasma lipoprotein particle|GO:0005737,cytoplasm|GO:0042627,chylomicron|GO:0070062,extracellular exosome|GO:0005615,extracellular sp…	GO:0017127,cholesterol transporter activity|GO:0044877,macromolecular complex binding|GO:0008047,enzyme activator activity|GO:0004857,enzyme inhibitor activity|GO:0098772,molecular function regulator|GO:0060228,phosphatidylcholine-sterol O-acyltransferase activator activity|GO:0034190,apolipoprotein receptor binding|GO:0043168,anion binding|GO:0043169,cation binding|GO:0055102,lipase inhibitor ac…	hsa03320,PPAR signaling pathway	http://www.uniprot.org/uniprot/P02652
P0C0L4	2.18925	1.13044	P0C0L4	C4A	GO:0006909,phagocytosis|GO:0080090,regulation of primary metabolic process|GO:0019222,regulation of metabolic process|GO:0051049,regulation of transport|GO:0048584,positive regulation of response to stimulus|GO:0048583,regulation of response to stimulus|GO:0002455,humoral immune response mediated by circulating immunoglobulin|GO:0031347,regulation of defense response|GO:0044710,single-organism me…	GO:0043230,extracellular organelle|GO:0031982,vesicle|GO:0044421,extracellular region part|GO:0043227,membrane-bounded organelle|GO:0016020,membrane|GO:0044464,cell part|GO:0005623,cell|GO:0031988,membrane-bounded vesicle|GO:0071944,cell periphery|GO:0005615,extracellular space|GO:0072562,blood microparticle|GO:0005886,plasma membrane|GO:0005576,extracellular region|GO:1903561,extracellular vesic…	GO:0005488,binding|GO:0004866,endopeptidase inhibitor activity|GO:0061135,endopeptidase regulator activity|GO:0061134,peptidase regulator activity|GO:0001849,complement component C1q binding|GO:0001848,complement binding|GO:0005515,protein binding|GO:0030414,peptidase inhibitor activity|GO:0004857,enzyme inhibitor activity|GO:0098772,molecular function regulator|GO:0030234,enzyme regulator activi…	hsa05133,Pertussis|hsa05322,Systemic lupus erythematosus|hsa04610,Complement and coagulation cascades|hsa05150,Staphylococcus aureus infection	http://www.uniprot.org/uniprot/P0C0L4
Q9UN19	2.22285	1.15241	Q9UN19	DAPP1	GO:0016311,dephosphorylation|GO:0006470,protein dephosphorylation|GO:0023052,signaling|GO:0007165,signal transduction|GO:0050789,regulation of biological process|GO:0044699,single-organism process|GO:0044267,cellular protein metabolic process|GO:0051716,cellular response to stimulus|GO:0044260,cellular macromolecule metabolic process|GO:0071704,organic substance metabolic process|GO:0065007,biolo…	GO:0005737,cytoplasm|GO:0005829,cytosol|GO:0016020,membrane|GO:0044464,cell part|GO:0005623,cell|GO:0005622,intracellular|GO:0044444,cytoplasmic part|GO:0071944,cell periphery|GO:0005886,plasma membrane|GO:0044424,intracellular part	GO:0043168,anion binding|GO:0035091,phosphatidylinositol binding|GO:0005543,phospholipid binding|GO:0008289,lipid binding|GO:0005547,phosphatidylinositol-3,4,5-trisphosphate binding|GO:1902936,phosphatidylinositol bisphosphate binding|GO:0043325,phosphatidylinositol-3,4-bisphosphate binding|GO:0005488,binding|GO:0005515,protein binding|GO:1901981,phosphatidylinositol phosphate binding|GO:0043167,…	hsa04662,B cell receptor signaling pathway	http://www.uniprot.org/uniprot/Q9UN19
Q9Y277	2.25405	1.17252	Q9Y277	VDAC3	GO:0022604,regulation of cell morphogenesis|GO:0022607,cellular component assembly|GO:0015853,adenine transport|GO:0015851,nucleobase transport|GO:0033043,regulation of organelle organization|GO:0030030,cell projection organization|GO:0051049,regulation of transport|GO:0006863,purine nucleobase transport|GO:0051128,regulation of cellular component organization|GO:0060491,regulation of cell projec…	GO:0044421,extracellular region part|GO:0031975,envelope|GO:0043229,intracellular organelle|GO:0043227,membrane-bounded organelle|GO:0043226,organelle|GO:0031224,intrinsic component of membrane|GO:0005737,cytoplasm|GO:0046930,pore complex|GO:0031982,vesicle|GO:0005634,nucleus|GO:0016020,membrane|GO:0044444,cytoplasmic part|GO:0005739,mitochondrion|GO:0031988,membrane-bounded vesicle|GO:0005576,ex…	GO:0015288,porin activity|GO:0005488,binding|GO:0022838,substrate-specific channel activity|GO:1901363,heterocyclic compound binding|GO:1901265,nucleoside phosphate binding|GO:0008509,anion transmembrane transporter activity|GO:0000166,nucleotide binding|GO:0022829,wide pore channel activity|GO:0022803,passive transmembrane transporter activity|GO:0005253,anion channel activity|GO:0005215,transpo…	hsa04022,cGMP-PKG signaling pathway|hsa04020,Calcium signaling pathway|hsa05203,Viral carcinogenesis|hsa05161,Hepatitis B|hsa05166,HTLV-I infection|hsa05016,Huntington's disease|hsa05012,Parkinson's disease	http://www.uniprot.org/uniprot/Q9Y277
P02647	2.2924	1.19686	P02647	APOA1	GO:0007599,hemostasis|GO:0051046,regulation of secretion|GO:0051048,negative regulation of secretion|GO:0051049,regulation of transport|GO:0007596,blood coagulation|GO:0044281,small molecule metabolic process|GO:0002701,negative regulation of production of molecular mediator of immune response|GO:0002700,regulation of production of molecular mediator of immune response|GO:0051716,cellular respons…	GO:0005783,endoplasmic reticulum|GO:0044421,extracellular region part|GO:0005886,plasma membrane|GO:0005788,endoplasmic reticulum lumen|GO:0030139,endocytic vesicle|GO:0043229,intracellular organelle|GO:0071944,cell periphery|GO:1990777,lipoprotein particle|GO:0060205,cytoplasmic membrane-bounded vesicle lumen|GO:0005622,intracellular|GO:0043227,membrane-bounded organelle|GO:0043226,organelle|GO:…	GO:0017127,cholesterol transporter activity|GO:0070325,lipoprotein particle receptor binding|GO:0044877,macromolecular complex binding|GO:0008047,enzyme activator activity|GO:0004857,enzyme inhibitor activity|GO:0098772,molecular function regulator|GO:0060228,phosphatidylcholine-sterol O-acyltransferase activator activity|GO:0034191,apolipoprotein A-I receptor binding|GO:0034190,apolipoprotein re…	hsa05143,African trypanosomiasis|hsa03320,PPAR signaling pathway|hsa04975,Fat digestion and absorption|hsa04977,Vitamin digestion and absorption	http://www.uniprot.org/uniprot/P02647
P45880	2.32205	1.2154	P45880	VDAC2	GO:2001234,negative regulation of apoptotic signaling pathway|GO:0022607,cellular component assembly|GO:0006461,protein complex assembly|GO:0051234,establishment of localization|GO:2001233,regulation of apoptotic signaling pathway|GO:0043933,macromolecular complex subunit organization|GO:0051049,regulation of transport|GO:0048585,negative regulation of response to stimulus|GO:0034622,cellular mac…	GO:0098796,membrane protein complex|GO:0044421,extracellular region part|GO:0044464,cell part|GO:0031974,membrane-enclosed lumen|GO:0031975,envelope|GO:0043229,intracellular organelle|GO:0043228,non-membrane-bounded organelle|GO:0042645,mitochondrial nucleoid|GO:0043227,membrane-bounded organelle|GO:0043226,organelle|GO:0031224,intrinsic component of membrane|GO:0005737,cytoplasm|GO:0046930,pore …	GO:0015288,porin activity|GO:0005488,binding|GO:0022838,substrate-specific channel activity|GO:1901363,heterocyclic compound binding|GO:1901265,nucleoside phosphate binding|GO:0008509,anion transmembrane transporter activity|GO:0000166,nucleotide binding|GO:0022829,wide pore channel activity|GO:0022803,passive transmembrane transporter activity|GO:0005253,anion channel activity|GO:0005215,transpo…	hsa04022,cGMP-PKG signaling pathway|hsa04020,Calcium signaling pathway|hsa05166,HTLV-I infection|hsa05016,Huntington's disease|hsa05012,Parkinson's disease	http://www.uniprot.org/uniprot/P45880
O15144	2.34145	1.2274	O15144	ARPC2	GO:0006909,phagocytosis|GO:0034446,substrate adhesion-dependent cell spreading|GO:0048584,positive regulation of response to stimulus|GO:0048583,regulation of response to stimulus|GO:0008064,regulation of actin polymerization or depolymerization|GO:0060491,regulation of cell projection assembly|GO:0007165,signal transduction|GO:0007166,cell surface receptor signaling pathway|GO:0007167,enzyme lin…	GO:0015629,actin cytoskeleton|GO:0043229,intracellular organelle|GO:0043228,non-membrane-bounded organelle|GO:0045202,synapse|GO:0005924,cell-substrate adherens junction|GO:0005925,focal adhesion|GO:0043227,membrane-bounded organelle|GO:0043226,organelle|GO:0030054,cell junction|GO:0030055,cell-substrate junction|GO:0005856,cytoskeleton|GO:0042995,cell projection|GO:0070062,extracellular exosome|…	GO:0071933,Arp2/3 complex binding|GO:0005200,structural constituent of cytoskeleton|GO:0008092,cytoskeletal protein binding|GO:0051015,actin filament binding|GO:0005198,structural molecule activity|GO:0003779,actin binding|GO:0019894,kinesin binding|GO:0044877,macromolecular complex binding|GO:0005488,binding|GO:0005515,protein binding|GO:0035650,AP-1 adaptor complex binding|GO:0032403,protein co…	hsa05132,Salmonella infection|hsa05131,Shigellosis|hsa05130,Pathogenic Escherichia coli infection|hsa05100,Bacterial invasion of epithelial cells|hsa04144,Endocytosis|hsa04666,Fc gamma R-mediated phagocytosis|hsa04810,Regulation of actin cytoskeleton	http://www.uniprot.org/uniprot/O15144
[truncated: 14 more rows]

## Sheet: C-B
ID	FoldChange	Log2FoldChange	Uniprot	Genename	Biological Process	Cell Component	Molecular Function	KEGG Pathways	UNIPROT_URL
[truncated: 78 more rows]

## Sheet: D-B
ID	FoldChange	Log2FoldChange	Uniprot	Genename	Biological Process	Cell Component	Molecular Function	KEGG Pathways	UNIPROT_URL
[truncated: 98 more rows]
