# Supplementary material
Source: publisher figshare collection journal article supplement (https://tandf.figshare.com/articles/dataset/_/6062987)
Supplement: Supplementary file 1 [file 2 › Exc.2 The detail information of the 33 common differentially expressed proteins caused by storage time by General iTRAQ.xlsx]

## Sheet: Sheet1
NO	ID	Genename	Log2FoldChange	Biological Process	Cell Component	Molecular Function	KEGG Pathways	UNIPROT_URL
1	B2RUZ4	SMIM1	-1.55173	0	GO:0043230,extracellular organelle|GO:0031982,vesicle|GO:0044421,extracellular region part|GO:0043227,membrane-bounded organelle|GO:0016021,integral component of membrane|GO:0016020,membrane|GO:0031988,membrane-bounded vesicle|GO:0005576,extracellular region|GO:0044425,membrane part|GO:1903561,extracellular vesicle|GO:0065010,extracellular membrane-bounded organelle|GO:0043226,organelle|GO:003122…	0	0	http://www.uniprot.org/uniprot/B2RUZ4
2	Q71U36	TUBA1A	-1.22702	GO:0022607,cellular component assembly|GO:0006457,protein folding|GO:0044839,cell cycle G2/M phase transition|GO:0070271,protein complex biogenesis|GO:0000086,G2/M transition of mitotic cell cycle|GO:0006458,'de novo' protein folding|GO:1903047,mitotic cell cycle process|GO:0044770,cell cycle phase transition|GO:0044772,mitotic cell cycle phase transition|GO:0022402,cell cycle process|GO:0034622,…	GO:0005200,structural constituent of cytoskeleton|GO:0035639,purine ribonucleoside triphosphate binding|GO:0005488,binding|GO:0005198,structural molecule activity|GO:1901363,heterocyclic compound binding|GO:1901265,nucleoside phosphate binding|GO:0001882,nucleoside binding|GO:0043168,anion binding|GO:0016462,pyrophosphatase activity|GO:0000166,nucleotide binding|GO:0032561,guanyl ribonucleotide b…	GO:0005200,structural constituent of cytoskeleton|GO:0035639,purine ribonucleoside triphosphate binding|GO:0005488,binding|GO:0005198,structural molecule activity|GO:1901363,heterocyclic compound binding|GO:1901265,nucleoside phosphate binding|GO:0001882,nucleoside binding|GO:0043168,anion binding|GO:0016462,pyrophosphatase activity|GO:0000166,nucleotide binding|GO:0032561,guanyl ribonucleotide b…	hsa05130,Pathogenic Escherichia coli infection|hsa04145,Phagosome|hsa04540,Gap junction	http://www.uniprot.org/uniprot/Q71U36
3	P40197	GP5	-1.21961	GO:0032102,negative regulation of response to external stimulus|GO:0008152,metabolic process|GO:0032101,regulation of response to external stimulus|GO:0050865,regulation of cell activation|GO:0048585,negative regulation of response to stimulus|GO:0050866,negative regulation of cell activation|GO:0048583,regulation of response to stimulus|GO:0009611,response to wounding|GO:0007160,cell-matrix adhe…	GO:0005488,binding|GO:0005515,protein binding|GO:0032403,protein complex binding|GO:0044877,macromolecular complex binding|GO:0005518,collagen binding	GO:0005488,binding|GO:0005515,protein binding|GO:0032403,protein complex binding|GO:0044877,macromolecular complex binding|GO:0005518,collagen binding	hsa04611,Platelet activation|hsa04512,ECM-receptor interaction|hsa04640,Hematopoietic cell lineage	http://www.uniprot.org/uniprot/P40197
4	Q8NG06	TRIM58	-0.962688	GO:0071704,organic substance metabolic process|GO:0044267,cellular protein metabolic process|GO:0044238,primary metabolic process|GO:0044260,cellular macromolecule metabolic process|GO:0032446,protein modification by small protein conjugation|GO:0019538,protein metabolic process|GO:0009987,cellular process|GO:0070647,protein modification by small protein conjugation or removal|GO:0006464,cellular…	GO:0043169,cation binding|GO:0046914,transition metal ion binding|GO:0043167,ion binding|GO:0003824,catalytic activity|GO:0008270,zinc ion binding|GO:0046872,metal ion binding|GO:0016874,ligase activity|GO:0005488,binding	GO:0043169,cation binding|GO:0046914,transition metal ion binding|GO:0043167,ion binding|GO:0003824,catalytic activity|GO:0008270,zinc ion binding|GO:0046872,metal ion binding|GO:0016874,ligase activity|GO:0005488,binding	0	http://www.uniprot.org/uniprot/Q8NG06
5	O43633	CHMP2A	-0.864465	GO:0008104,protein localization|GO:0051046,regulation of secretion|GO:0051047,positive regulation of secretion|GO:0051049,regulation of transport|GO:0006900,membrane budding|GO:0061024,membrane organization|GO:0051656,establishment of organelle localization|GO:0071840,cellular component organization or biogenesis|GO:0007017,microtubule-based process|GO:0045786,negative regulation of cell cycle|GO…	GO:0043168,anion binding|GO:0043169,cation binding|GO:0043178,alcohol binding|GO:0005543,phospholipid binding|GO:0008289,lipid binding|GO:0050997,quaternary ammonium group binding|GO:0043167,ion binding|GO:0070405,ammonium ion binding|GO:0031210,phosphatidylcholine binding|GO:0036094,small molecule binding|GO:0019904,protein domain specific binding|GO:0005515,protein binding|GO:0005488,binding	GO:0043168,anion binding|GO:0043169,cation binding|GO:0043178,alcohol binding|GO:0005543,phospholipid binding|GO:0008289,lipid binding|GO:0050997,quaternary ammonium group binding|GO:0043167,ion binding|GO:0070405,ammonium ion binding|GO:0031210,phosphatidylcholine binding|GO:0036094,small molecule binding|GO:0019904,protein domain specific binding|GO:0005515,protein binding|GO:0005488,binding	hsa04144,Endocytosis	http://www.uniprot.org/uniprot/O43633
6	P56202	CTSW	-0.816926	GO:0044248,cellular catabolic process|GO:0044267,cellular protein metabolic process|GO:1901575,organic substance catabolic process|GO:0044265,cellular macromolecule catabolic process|GO:0044260,cellular macromolecule metabolic process|GO:0071704,organic substance metabolic process|GO:0006508,proteolysis|GO:0044238,primary metabolic process|GO:0009987,cellular process|GO:0030163,protein catabolic …	GO:0016787,hydrolase activity|GO:0004175,endopeptidase activity|GO:0070011,peptidase activity, acting on L-amino acid peptides|GO:0003824,catalytic activity|GO:0004197,cysteine-type endopeptidase activity|GO:0008233,peptidase activity|GO:0008234,cysteine-type peptidase activity	GO:0016787,hydrolase activity|GO:0004175,endopeptidase activity|GO:0070011,peptidase activity, acting on L-amino acid peptides|GO:0003824,catalytic activity|GO:0004197,cysteine-type endopeptidase activity|GO:0008233,peptidase activity|GO:0008234,cysteine-type peptidase activity	hsa04142,Lysosome	http://www.uniprot.org/uniprot/P56202
7	Q8N699	MYCT1	-0.737928	0	0	0	0	http://www.uniprot.org/uniprot/Q8N699
8	Q9NX76	CMTM6	-0.717382	GO:0040011,locomotion|GO:0006935,chemotaxis|GO:0042330,taxis|GO:0050896,response to stimulus|GO:0042221,response to chemical|GO:0009605,response to external stimulus	GO:0005102,receptor binding|GO:0005125,cytokine activity|GO:0005488,binding|GO:0005515,protein binding	GO:0005102,receptor binding|GO:0005125,cytokine activity|GO:0005488,binding|GO:0005515,protein binding	0	http://www.uniprot.org/uniprot/Q9NX76
9	Q99418	CYTH2	-0.615729	GO:0006810,transport|GO:0009893,positive regulation of metabolic process|GO:0019222,regulation of metabolic process|GO:0030155,regulation of cell adhesion|GO:0048583,regulation of response to stimulus|GO:0030036,actin cytoskeleton organization|GO:0006897,endocytosis|GO:0023052,signaling|GO:0007165,signal transduction|GO:0023051,regulation of signaling|GO:0051234,establishment of localization|GO:0…	GO:0043168,anion binding|GO:0070679,inositol 1,4,5 trisphosphate binding|GO:0043178,alcohol binding|GO:0005085,guanyl-nucleotide exchange factor activity|GO:0008289,lipid binding|GO:0043167,ion binding|GO:0036094,small molecule binding|GO:0005488,binding|GO:0005515,protein binding|GO:0098772,molecular function regulator|GO:0005086,ARF guanyl-nucleotide exchange factor activity	GO:0043168,anion binding|GO:0070679,inositol 1,4,5 trisphosphate binding|GO:0043178,alcohol binding|GO:0005085,guanyl-nucleotide exchange factor activity|GO:0008289,lipid binding|GO:0043167,ion binding|GO:0036094,small molecule binding|GO:0005488,binding|GO:0005515,protein binding|GO:0098772,molecular function regulator|GO:0005086,ARF guanyl-nucleotide exchange factor activity	hsa04144,Endocytosis	http://www.uniprot.org/uniprot/Q99418
10	P14854	COX6B1	0.651408	GO:0044707,single-multicellular organism process|GO:0032774,RNA biosynthetic process|GO:1902600,hydrogen ion transmembrane transport|GO:0006810,transport|GO:0006366,transcription from RNA polymerase II promoter|GO:0090304,nucleic acid metabolic process|GO:0044249,cellular biosynthetic process|GO:0034641,cellular nitrogen compound metabolic process|GO:0060322,head development|GO:0021762,substantia…	GO:0004129,cytochrome-c oxidase activity|GO:0022890,inorganic cation transmembrane transporter activity|GO:0022891,substrate-specific transmembrane transporter activity|GO:0022892,substrate-specific transporter activity|GO:0005215,transporter activity|GO:0008324,cation transmembrane transporter activity|GO:0022857,transmembrane transporter activity|GO:0015075,ion transmembrane transporter activit…	GO:0004129,cytochrome-c oxidase activity|GO:0022890,inorganic cation transmembrane transporter activity|GO:0022891,substrate-specific transmembrane transporter activity|GO:0022892,substrate-specific transporter activity|GO:0005215,transporter activity|GO:0008324,cation transmembrane transporter activity|GO:0022857,transmembrane transporter activity|GO:0015075,ion transmembrane transporter activit…	hsa00190,Oxidative phosphorylation|hsa04260,Cardiac muscle contraction|hsa01100,Metabolic pathways|hsa04932,Non-alcoholic fatty liver disease (NAFLD)|hsa05016,Huntington's disease|hsa05010,Alzheimer's disease|hsa05012,Parkinson's disease	http://www.uniprot.org/uniprot/P14854
11	P45880	VDAC2	0.667256	GO:2001234,negative regulation of apoptotic signaling pathway|GO:0022607,cellular component assembly|GO:0006461,protein complex assembly|GO:0051234,establishment of localization|GO:2001233,regulation of apoptotic signaling pathway|GO:0043933,macromolecular complex subunit organization|GO:0051049,regulation of transport|GO:0048585,negative regulation of response to stimulus|GO:0034622,cellular mac…	GO:0015288,porin activity|GO:0005488,binding|GO:0022838,substrate-specific channel activity|GO:1901363,heterocyclic compound binding|GO:1901265,nucleoside phosphate binding|GO:0008509,anion transmembrane transporter activity|GO:0000166,nucleotide binding|GO:0022829,wide pore channel activity|GO:0022803,passive transmembrane transporter activity|GO:0005253,anion channel activity|GO:0005215,transpo…	GO:0015288,porin activity|GO:0005488,binding|GO:0022838,substrate-specific channel activity|GO:1901363,heterocyclic compound binding|GO:1901265,nucleoside phosphate binding|GO:0008509,anion transmembrane transporter activity|GO:0000166,nucleotide binding|GO:0022829,wide pore channel activity|GO:0022803,passive transmembrane transporter activity|GO:0005253,anion channel activity|GO:0005215,transpo…	hsa04022,cGMP-PKG signaling pathway|hsa04020,Calcium signaling pathway|hsa05166,HTLV-I infection|hsa05016,Huntington's disease|hsa05012,Parkinson's disease	http://www.uniprot.org/uniprot/P45880
12	P48047	ATP5O	0.69488	GO:0009167,purine ribonucleoside monophosphate metabolic process|GO:0009165,nucleotide biosynthetic process|GO:0009163,nucleoside biosynthetic process|GO:0009161,ribonucleoside monophosphate metabolic process|GO:1901362,organic cyclic compound biosynthetic process|GO:0042451,purine nucleoside biosynthetic process|GO:0009168,purine ribonucleoside monophosphate biosynthetic process|GO:0044710,singl…	GO:0008144,drug binding|GO:0005488,binding|GO:0016887,ATPase activity|GO:0042625,ATPase activity, coupled to transmembrane movement of ions|GO:0042626,ATPase activity, coupled to transmembrane movement of substances|GO:0016820,hydrolase activity, acting on acid anhydrides, catalyzing transmembrane movement of substances|GO:0046933,proton-transporting ATP synthase activity, rotational mechanism|GO…	GO:0008144,drug binding|GO:0005488,binding|GO:0016887,ATPase activity|GO:0042625,ATPase activity, coupled to transmembrane movement of ions|GO:0042626,ATPase activity, coupled to transmembrane movement of substances|GO:0016820,hydrolase activity, acting on acid anhydrides, catalyzing transmembrane movement of substances|GO:0046933,proton-transporting ATP synthase activity, rotational mechanism|GO…	hsa05016,Huntington's disease|hsa01100,Metabolic pathways|hsa05010,Alzheimer's disease|hsa05012,Parkinson's disease|hsa00190,Oxidative phosphorylation	http://www.uniprot.org/uniprot/P48047
13	P24557	TBXAS1	0.715586	GO:0006633,fatty acid biosynthetic process|GO:0006631,fatty acid metabolic process|GO:0006636,unsaturated fatty acid biosynthetic process|GO:0019752,carboxylic acid metabolic process|GO:0043436,oxoacid metabolic process|GO:0009410,response to xenobiotic stimulus|GO:0044281,small molecule metabolic process|GO:0070887,cellular response to chemical stimulus|GO:0044283,small molecule biosynthetic pro…	GO:0043169,cation binding|GO:0004497,monooxygenase activity|GO:0046872,metal ion binding|GO:0016853,isomerase activity|GO:0020037,heme binding|GO:0046906,tetrapyrrole binding|GO:0097159,organic cyclic compound binding|GO:0016705,oxidoreductase activity, acting on paired donors, with incorporation or reduction of molecular oxygen|GO:0046914,transition metal ion binding|GO:0003824,catalytic activit…	GO:0043169,cation binding|GO:0004497,monooxygenase activity|GO:0046872,metal ion binding|GO:0016853,isomerase activity|GO:0020037,heme binding|GO:0046906,tetrapyrrole binding|GO:0097159,organic cyclic compound binding|GO:0016705,oxidoreductase activity, acting on paired donors, with incorporation or reduction of molecular oxygen|GO:0046914,transition metal ion binding|GO:0003824,catalytic activit…	hsa00590,Arachidonic acid metabolism|hsa04611,Platelet activation|hsa01100,Metabolic pathways	http://www.uniprot.org/uniprot/P24557
14	Q14165	MLEC	0.73127	GO:0006457,protein folding|GO:0044249,cellular biosynthetic process|GO:0034645,cellular macromolecule biosynthetic process|GO:0009100,glycoprotein metabolic process|GO:0009101,glycoprotein biosynthetic process|GO:0044699,single-organism process|GO:0044267,cellular protein metabolic process|GO:0044710,single-organism metabolic process|GO:0044260,cellular macromolecule metabolic process|GO:0006487,…	GO:0005488,binding|GO:0030246,carbohydrate binding|GO:0019899,enzyme binding|GO:0005515,protein binding	GO:0005488,binding|GO:0030246,carbohydrate binding|GO:0019899,enzyme binding|GO:0005515,protein binding	0	http://www.uniprot.org/uniprot/Q14165
15	P30405	PPIF	0.734742	GO:2001234,negative regulation of apoptotic signaling pathway|GO:2001235,positive regulation of apoptotic signaling pathway|GO:0019220,regulation of phosphate metabolic process|GO:0080090,regulation of primary metabolic process|GO:0019222,regulation of metabolic process|GO:2001233,regulation of apoptotic signaling pathway|GO:0051049,regulation of transport|GO:0048585,negative regulation of respon…	GO:0042277,peptide binding|GO:0016853,isomerase activity|GO:0033218,amide binding|GO:0008144,drug binding|GO:0003824,catalytic activity|GO:0005515,protein binding|GO:0003755,peptidyl-prolyl cis-trans isomerase activity|GO:0016018,cyclosporin A binding|GO:0016859,cis-trans isomerase activity|GO:0005488,binding	GO:0042277,peptide binding|GO:0016853,isomerase activity|GO:0033218,amide binding|GO:0008144,drug binding|GO:0003824,catalytic activity|GO:0005515,protein binding|GO:0003755,peptidyl-prolyl cis-trans isomerase activity|GO:0016018,cyclosporin A binding|GO:0016859,cis-trans isomerase activity|GO:0005488,binding	hsa04022,cGMP-PKG signaling pathway|hsa04020,Calcium signaling pathway|hsa05016,Huntington's disease|hsa05012,Parkinson's disease|hsa05145,Toxoplasmosis	http://www.uniprot.org/uniprot/P30405
16	P01861	IGHG4	0.747989	GO:0044238,primary metabolic process|GO:0006909,phagocytosis|GO:0006950,response to stress|GO:0048584,positive regulation of response to stimulus|GO:0048583,regulation of response to stimulus|GO:0023052,signaling|GO:0007165,signal transduction|GO:0007166,cell surface receptor signaling pathway|GO:0002455,humoral immune response mediated by circulating immunoglobulin|GO:0050789,regulation of biolo…	GO:0005488,binding|GO:0003823,antigen binding	GO:0005488,binding|GO:0003823,antigen binding	0	http://www.uniprot.org/uniprot/P01861
17	P62942	FKBP1A	0.765917	GO:0044238,primary metabolic process|GO:0032924,activin receptor signaling pathway|GO:0032925,regulation of activin receptor signaling pathway|GO:0019222,regulation of metabolic process|GO:0051049,regulation of transport|GO:0032386,regulation of intracellular transport|GO:0048584,positive regulation of response to stimulus|GO:0051282,regulation of sequestering of calcium ion|GO:0051283,negative r…	GO:0005126,cytokine receptor binding|GO:0005160,transforming growth factor beta receptor binding|GO:0008144,drug binding|GO:0060089,molecular transducer activity|GO:0044877,macromolecular complex binding|GO:0005488,binding|GO:0004871,signal transducer activity|GO:0044325,ion channel binding|GO:0098772,molecular function regulator|GO:1901363,heterocyclic compound binding|GO:0019855,calcium channel…	GO:0005126,cytokine receptor binding|GO:0005160,transforming growth factor beta receptor binding|GO:0008144,drug binding|GO:0060089,molecular transducer activity|GO:0044877,macromolecular complex binding|GO:0005488,binding|GO:0004871,signal transducer activity|GO:0044325,ion channel binding|GO:0098772,molecular function regulator|GO:1901363,heterocyclic compound binding|GO:0019855,calcium channel…	0	http://www.uniprot.org/uniprot/P62942
18	Q9Y277	VDAC3	0.771632	GO:0022604,regulation of cell morphogenesis|GO:0022607,cellular component assembly|GO:0015853,adenine transport|GO:0015851,nucleobase transport|GO:0033043,regulation of organelle organization|GO:0030030,cell projection organization|GO:0051049,regulation of transport|GO:0006863,purine nucleobase transport|GO:0051128,regulation of cellular component organization|GO:0060491,regulation of cell projec…	GO:0015288,porin activity|GO:0005488,binding|GO:0022838,substrate-specific channel activity|GO:1901363,heterocyclic compound binding|GO:1901265,nucleoside phosphate binding|GO:0008509,anion transmembrane transporter activity|GO:0000166,nucleotide binding|GO:0022829,wide pore channel activity|GO:0022803,passive transmembrane transporter activity|GO:0005253,anion channel activity|GO:0005215,transpo…	GO:0015288,porin activity|GO:0005488,binding|GO:0022838,substrate-specific channel activity|GO:1901363,heterocyclic compound binding|GO:1901265,nucleoside phosphate binding|GO:0008509,anion transmembrane transporter activity|GO:0000166,nucleotide binding|GO:0022829,wide pore channel activity|GO:0022803,passive transmembrane transporter activity|GO:0005253,anion channel activity|GO:0005215,transpo…	hsa04022,cGMP-PKG signaling pathway|hsa04020,Calcium signaling pathway|hsa05203,Viral carcinogenesis|hsa05161,Hepatitis B|hsa05166,HTLV-I infection|hsa05016,Huntington's disease|hsa05012,Parkinson's disease	http://www.uniprot.org/uniprot/Q9Y277
19	P40926	MDH2	0.840322	GO:0044238,primary metabolic process|GO:0019674,NAD metabolic process|GO:0006732,coenzyme metabolic process|GO:0046364,monosaccharide biosynthetic process|GO:0006473,protein acetylation|GO:0006475,internal protein amino acid acetylation|GO:0019752,carboxylic acid metabolic process|GO:0044723,single-organism carbohydrate metabolic process|GO:0006099,tricarboxylic acid cycle|GO:0009060,aerobic resp…	GO:0005488,binding|GO:0016614,oxidoreductase activity, acting on CH-OH group of donors|GO:0016615,malate dehydrogenase activity|GO:0016616,oxidoreductase activity, acting on the CH-OH group of donors, NAD or NADP as acceptor|GO:0043621,protein self-association|GO:0097159,organic cyclic compound binding|GO:0044822,poly(A) RNA binding|GO:0005515,protein binding|GO:0003824,catalytic activity|GO:0030…	GO:0005488,binding|GO:0016614,oxidoreductase activity, acting on CH-OH group of donors|GO:0016615,malate dehydrogenase activity|GO:0016616,oxidoreductase activity, acting on the CH-OH group of donors, NAD or NADP as acceptor|GO:0043621,protein self-association|GO:0097159,organic cyclic compound binding|GO:0044822,poly(A) RNA binding|GO:0005515,protein binding|GO:0003824,catalytic activity|GO:0030…	hsa00620,Pyruvate metabolism|hsa01100,Metabolic pathways|hsa00630,Glyoxylate and dicarboxylate metabolism|hsa01200,Carbon metabolism|hsa01130,Biosynthesis of antibiotics|hsa00270,Cysteine and methionine metabolism|hsa00020,Citrate cycle (TCA cycle)	http://www.uniprot.org/uniprot/P40926
20	P52907	CAPZA1	0.859214	GO:0022607,cellular component assembly|GO:0007599,hemostasis|GO:0033043,regulation of organelle organization|GO:0043933,macromolecular complex subunit organization|GO:0050896,response to stimulus|GO:1901879,regulation of protein depolymerization|GO:0051129,negative regulation of cellular component organization|GO:0051128,regulation of cellular component organization|GO:0008064,regulation of actin…	GO:0008092,cytoskeletal protein binding|GO:0051015,actin filament binding|GO:0003779,actin binding|GO:0044877,macromolecular complex binding|GO:0005488,binding|GO:0005515,protein binding|GO:0032403,protein complex binding	GO:0008092,cytoskeletal protein binding|GO:0051015,actin filament binding|GO:0003779,actin binding|GO:0044877,macromolecular complex binding|GO:0005488,binding|GO:0005515,protein binding|GO:0032403,protein complex binding	hsa04144,Endocytosis	http://www.uniprot.org/uniprot/P52907
21	O15143	ARPC1B	0.894604	GO:0022607,cellular component assembly|GO:0033043,regulation of organelle organization|GO:0043933,macromolecular complex subunit organization|GO:0030036,actin cytoskeleton organization|GO:0051128,regulation of cellular component organization|GO:0008064,regulation of actin polymerization or depolymerization|GO:0034314,Arp2/3 complex-mediated actin nucleation|GO:0034622,cellular macromolecular comp…	GO:0005200,structural constituent of cytoskeleton|GO:0008092,cytoskeletal protein binding|GO:0051015,actin filament binding|GO:0005198,structural molecule activity|GO:0003779,actin binding|GO:0044877,macromolecular complex binding|GO:0005488,binding|GO:0005515,protein binding|GO:0032403,protein complex binding	GO:0005200,structural constituent of cytoskeleton|GO:0008092,cytoskeletal protein binding|GO:0051015,actin filament binding|GO:0005198,structural molecule activity|GO:0003779,actin binding|GO:0044877,macromolecular complex binding|GO:0005488,binding|GO:0005515,protein binding|GO:0032403,protein complex binding	hsa05132,Salmonella infection|hsa05131,Shigellosis|hsa05130,Pathogenic Escherichia coli infection|hsa05100,Bacterial invasion of epithelial cells|hsa04144,Endocytosis|hsa04666,Fc gamma R-mediated phagocytosis|hsa04810,Regulation of actin cytoskeleton	http://www.uniprot.org/uniprot/O15143
22	P60709	ACTB	0.91575	GO:0006909,phagocytosis|GO:0007409,axonogenesis|GO:0060249,anatomical structure homeostasis|GO:0048584,positive regulation of response to stimulus|GO:0048583,regulation of response to stimulus|GO:0061024,membrane organization|GO:0060322,head development|GO:0007165,signal transduction|GO:0007166,cell surface receptor signaling pathway|GO:0007167,enzyme linked receptor protein signaling pathway|GO:…	GO:0019894,kinesin binding|GO:0019899,enzyme binding|GO:0005200,structural constituent of cytoskeleton|GO:0035639,purine ribonucleoside triphosphate binding|GO:0001012,RNA polymerase II regulatory region DNA binding|GO:0001159,core promoter proximal region DNA binding|GO:0001158,enhancer sequence-specific DNA binding|GO:0031491,nucleosome binding|GO:0031490,chromatin DNA binding|GO:0031492,nucleo…	GO:0019894,kinesin binding|GO:0019899,enzyme binding|GO:0005200,structural constituent of cytoskeleton|GO:0035639,purine ribonucleoside triphosphate binding|GO:0001012,RNA polymerase II regulatory region DNA binding|GO:0001159,core promoter proximal region DNA binding|GO:0001158,enhancer sequence-specific DNA binding|GO:0031491,nucleosome binding|GO:0031490,chromatin DNA binding|GO:0031492,nucleo…	hsa05132,Salmonella infection|hsa05131,Shigellosis|hsa05130,Pathogenic Escherichia coli infection|hsa04611,Platelet activation|hsa04530,Tight junction|hsa04670,Leukocyte transendothelial migration|hsa04145,Phagosome|hsa04510,Focal adhesion|hsa05410,Hypertrophic cardiomyopathy (HCM)|hsa05412,Arrhythmogenic right ventricular cardiomyopathy (ARVC)|hsa05414,Dilated cardiomyopathy|hsa04921,Oxytocin si…	http://www.uniprot.org/uniprot/P60709
23	O15511	ARPC5	0.91575	GO:0006909,phagocytosis|GO:0048584,positive regulation of response to stimulus|GO:0048583,regulation of response to stimulus|GO:0008064,regulation of actin polymerization or depolymerization|GO:0007165,signal transduction|GO:0007166,cell surface receptor signaling pathway|GO:0007167,enzyme linked receptor protein signaling pathway|GO:0030182,neuron differentiation|GO:0007169,transmembrane recepto…	GO:0005200,structural constituent of cytoskeleton|GO:0008092,cytoskeletal protein binding|GO:0051015,actin filament binding|GO:0005198,structural molecule activity|GO:0003779,actin binding|GO:0044877,macromolecular complex binding|GO:0005488,binding|GO:0005515,protein binding|GO:0032403,protein complex binding	GO:0005200,structural constituent of cytoskeleton|GO:0008092,cytoskeletal protein binding|GO:0051015,actin filament binding|GO:0005198,structural molecule activity|GO:0003779,actin binding|GO:0044877,macromolecular complex binding|GO:0005488,binding|GO:0005515,protein binding|GO:0032403,protein complex binding	hsa05132,Salmonella infection|hsa05131,Shigellosis|hsa05130,Pathogenic Escherichia coli infection|hsa05100,Bacterial invasion of epithelial cells|hsa04144,Endocytosis|hsa04666,Fc gamma R-mediated phagocytosis|hsa04810,Regulation of actin cytoskeleton	http://www.uniprot.org/uniprot/O15511
24	O15144	ARPC2	0.923872	GO:0006909,phagocytosis|GO:0034446,substrate adhesion-dependent cell spreading|GO:0048584,positive regulation of response to stimulus|GO:0048583,regulation of response to stimulus|GO:0008064,regulation of actin polymerization or depolymerization|GO:0060491,regulation of cell projection assembly|GO:0007165,signal transduction|GO:0007166,cell surface receptor signaling pathway|GO:0007167,enzyme lin…	GO:0071933,Arp2/3 complex binding|GO:0005200,structural constituent of cytoskeleton|GO:0008092,cytoskeletal protein binding|GO:0051015,actin filament binding|GO:0005198,structural molecule activity|GO:0003779,actin binding|GO:0019894,kinesin binding|GO:0044877,macromolecular complex binding|GO:0005488,binding|GO:0005515,protein binding|GO:0035650,AP-1 adaptor complex binding|GO:0032403,protein co…	GO:0071933,Arp2/3 complex binding|GO:0005200,structural constituent of cytoskeleton|GO:0008092,cytoskeletal protein binding|GO:0051015,actin filament binding|GO:0005198,structural molecule activity|GO:0003779,actin binding|GO:0019894,kinesin binding|GO:0044877,macromolecular complex binding|GO:0005488,binding|GO:0005515,protein binding|GO:0035650,AP-1 adaptor complex binding|GO:0032403,protein co…	hsa05132,Salmonella infection|hsa05131,Shigellosis|hsa05130,Pathogenic Escherichia coli infection|hsa05100,Bacterial invasion of epithelial cells|hsa04144,Endocytosis|hsa04666,Fc gamma R-mediated phagocytosis|hsa04810,Regulation of actin cytoskeleton	http://www.uniprot.org/uniprot/O15144
25	P14406	COX7A2	0.943284	GO:0044699,single-organism process|GO:0006818,hydrogen transport|GO:0015992,proton transport|GO:0051234,establishment of localization|GO:1902600,hydrogen ion transmembrane transport|GO:0006812,cation transport|GO:0006811,ion transport|GO:0009987,cellular process|GO:0015672,monovalent inorganic cation transport|GO:0034220,ion transmembrane transport|GO:0044765,single-organism transport|GO:0044763,…	GO:0004129,cytochrome-c oxidase activity|GO:0022890,inorganic cation transmembrane transporter activity|GO:0022891,substrate-specific transmembrane transporter activity|GO:0022892,substrate-specific transporter activity|GO:0005215,transporter activity|GO:0008324,cation transmembrane transporter activity|GO:0022857,transmembrane transporter activity|GO:0015075,ion transmembrane transporter activit…	GO:0004129,cytochrome-c oxidase activity|GO:0022890,inorganic cation transmembrane transporter activity|GO:0022891,substrate-specific transmembrane transporter activity|GO:0022892,substrate-specific transporter activity|GO:0005215,transporter activity|GO:0008324,cation transmembrane transporter activity|GO:0022857,transmembrane transporter activity|GO:0015075,ion transmembrane transporter activit…	hsa00190,Oxidative phosphorylation|hsa04260,Cardiac muscle contraction|hsa04932,Non-alcoholic fatty liver disease (NAFLD)|hsa05016,Huntington's disease|hsa05010,Alzheimer's disease|hsa05012,Parkinson's disease	http://www.uniprot.org/uniprot/P14406
26	O15260	SURF4	0.947891	GO:0008104,protein localization|GO:0033043,regulation of organelle organization|GO:0051128,regulation of cellular component organization|GO:0051641,cellular localization|GO:0050789,regulation of biological process|GO:0044699,single-organism process|GO:0070727,cellular macromolecule localization|GO:0071840,cellular component organization or biogenesis|GO:0010256,endomembrane system organization|GO…	GO:0005488,binding|GO:0005515,protein binding	GO:0005488,binding|GO:0005515,protein binding	0	http://www.uniprot.org/uniprot/O15260
27	P01871	IGHM	0.952222	GO:0002376,immune system process|GO:0009607,response to biotic stimulus|GO:0043207,response to external biotic stimulus|GO:0019730,antimicrobial humoral response|GO:0019731,antibacterial humoral response|GO:0050896,response to stimulus|GO:0045087,innate immune response|GO:0009617,response to bacterium|GO:0006952,defense response|GO:0006950,response to stress|GO:0098542,defense response to other o…	GO:0034987,immunoglobulin receptor binding|GO:1901363,heterocyclic compound binding|GO:0005488,binding|GO:0003676,nucleic acid binding|GO:0003677,DNA binding|GO:0005539,glycosaminoglycan binding|GO:0043168,anion binding|GO:0043169,cation binding|GO:0043566,structure-specific DNA binding|GO:0005543,phospholipid binding|GO:0043167,ion binding|GO:0003697,single-stranded DNA binding|GO:0008289,lipid …	GO:0034987,immunoglobulin receptor binding|GO:1901363,heterocyclic compound binding|GO:0005488,binding|GO:0003676,nucleic acid binding|GO:0003677,DNA binding|GO:0005539,glycosaminoglycan binding|GO:0043168,anion binding|GO:0043169,cation binding|GO:0043566,structure-specific DNA binding|GO:0005543,phospholipid binding|GO:0043167,ion binding|GO:0003697,single-stranded DNA binding|GO:0008289,lipid …	0	http://www.uniprot.org/uniprot/P01871
28	P07954	FH	0.965212	GO:0060249,anatomical structure homeostasis|GO:0019752,carboxylic acid metabolic process|GO:0042592,homeostatic process|GO:0006099,tricarboxylic acid cycle|GO:0009060,aerobic respiration|GO:0044281,small molecule metabolic process|GO:0006091,generation of precursor metabolites and energy|GO:0072350,tricarboxylic acid metabolic process|GO:0044699,single-organism process|GO:0044710,single-organism …	GO:0016835,carbon-oxygen lyase activity|GO:0016836,hydro-lyase activity|GO:0003824,catalytic activity|GO:0005488,binding|GO:0005515,protein binding|GO:0004333,fumarate hydratase activity|GO:0016829,lyase activity	GO:0016835,carbon-oxygen lyase activity|GO:0016836,hydro-lyase activity|GO:0003824,catalytic activity|GO:0005488,binding|GO:0005515,protein binding|GO:0004333,fumarate hydratase activity|GO:0016829,lyase activity	hsa00620,Pyruvate metabolism|hsa01100,Metabolic pathways|hsa05211,Renal cell carcinoma|hsa05200,Pathways in cancer|hsa01200,Carbon metabolism|hsa01130,Biosynthesis of antibiotics|hsa00020,Citrate cycle (TCA cycle)	http://www.uniprot.org/uniprot/P07954
29	P21291	CSRP1	1.03118	GO:0016337,single organismal cell-cell adhesion|GO:0007596,blood coagulation|GO:0032501,multicellular organismal process|GO:0007599,hemostasis|GO:0044699,single-organism process|GO:0009611,response to wounding|GO:0065007,biological regulation|GO:0065008,regulation of biological quality|GO:0098602,single organism cell adhesion|GO:0050878,regulation of body fluid levels|GO:0098609,cell-cell adhesio…	GO:0005488,binding|GO:0043169,cation binding|GO:0046914,transition metal ion binding|GO:0097159,organic cyclic compound binding|GO:0044822,poly(A) RNA binding|GO:0043167,ion binding|GO:0008270,zinc ion binding|GO:0003676,nucleic acid binding|GO:0046872,metal ion binding|GO:1901363,heterocyclic compound binding|GO:0003723,RNA binding	GO:0005488,binding|GO:0043169,cation binding|GO:0046914,transition metal ion binding|GO:0097159,organic cyclic compound binding|GO:0044822,poly(A) RNA binding|GO:0043167,ion binding|GO:0008270,zinc ion binding|GO:0003676,nucleic acid binding|GO:0046872,metal ion binding|GO:1901363,heterocyclic compound binding|GO:0003723,RNA binding	0	http://www.uniprot.org/uniprot/P21291
30	Q86UX7	FERMT3	1.04138	GO:0022607,cellular component assembly|GO:0016337,single organismal cell-cell adhesion|GO:0034446,substrate adhesion-dependent cell spreading|GO:0043933,macromolecular complex subunit organization|GO:0050896,response to stimulus|GO:0030155,regulation of cell adhesion|GO:0030154,cell differentiation|GO:0048468,cell development|GO:0007596,blood coagulation|GO:0022407,regulation of cell-cell adhesio…	GO:0005178,integrin binding|GO:0044877,macromolecular complex binding|GO:0005488,binding|GO:0005515,protein binding|GO:0032403,protein complex binding|GO:0005102,receptor binding|GO:0050839,cell adhesion molecule binding	GO:0005178,integrin binding|GO:0044877,macromolecular complex binding|GO:0005488,binding|GO:0005515,protein binding|GO:0032403,protein complex binding|GO:0005102,receptor binding|GO:0050839,cell adhesion molecule binding	hsa04611,Platelet activation	http://www.uniprot.org/uniprot/Q86UX7
31	Q13642	FHL1	1.20596	GO:0000086,G2/M transition of mitotic cell cycle|GO:0051049,regulation of transport|GO:0000082,G1/S transition of mitotic cell cycle|GO:0032844,regulation of homeostatic process|GO:0051899,membrane depolarization|GO:0034765,regulation of ion transmembrane transport|GO:0034762,regulation of transmembrane transport|GO:0007517,muscle organ development|GO:0045786,negative regulation of cell cycle|GO:…	GO:0043169,cation binding|GO:0046914,transition metal ion binding|GO:0043167,ion binding|GO:0008270,zinc ion binding|GO:0005515,protein binding|GO:0044325,ion channel binding|GO:0046872,metal ion binding|GO:0005488,binding	GO:0043169,cation binding|GO:0046914,transition metal ion binding|GO:0043167,ion binding|GO:0008270,zinc ion binding|GO:0005515,protein binding|GO:0044325,ion channel binding|GO:0046872,metal ion binding|GO:0005488,binding	0	http://www.uniprot.org/uniprot/Q13642
32	P13501	CCL5	1.23582	GO:0051046,regulation of secretion|GO:0051049,regulation of transport|GO:0019058,viral life cycle|GO:0043933,macromolecular complex subunit organization|GO:0044281,small molecule metabolic process|GO:0098771,inorganic ion homeostasis|GO:0043200,response to amino acid|GO:0051716,cellular response to stimulus|GO:0043207,response to external biotic stimulus|GO:0000165,MAPK cascade|GO:0030595,leukocy…	GO:0005126,cytokine receptor binding|GO:0042056,chemoattractant activity|GO:0005125,cytokine activity|GO:0019207,kinase regulator activity|GO:0008009,chemokine activity|GO:0019209,kinase activator activity|GO:0042578,phosphoric ester hydrolase activity|GO:0046983,protein dimerization activity|GO:0008047,enzyme activator activity|GO:0001664,G-protein coupled receptor binding|GO:0098772,molecular f…	GO:0005126,cytokine receptor binding|GO:0042056,chemoattractant activity|GO:0005125,cytokine activity|GO:0019207,kinase regulator activity|GO:0008009,chemokine activity|GO:0019209,kinase activator activity|GO:0042578,phosphoric ester hydrolase activity|GO:0046983,protein dimerization activity|GO:0008047,enzyme activator activity|GO:0001664,G-protein coupled receptor binding|GO:0098772,molecular f…	hsa05120,Epithelial cell signaling in Helicobacter pylori infection|hsa05323,Rheumatoid arthritis|hsa04620,Toll-like receptor signaling pathway|hsa04621,NOD-like receptor signaling pathway|hsa04623,Cytosolic DNA-sensing pathway|hsa05142,Chagas disease (American trypanosomiasis)|hsa05164,Influenza A|hsa05168,Herpes simplex infection|hsa05020,Prion diseases|hsa04668,TNF signaling pathway|hsa04062,C…	http://www.uniprot.org/uniprot/P13501
33	P59998	ARPC4	1.96436	GO:0006909,phagocytosis|GO:0048584,positive regulation of response to stimulus|GO:0048583,regulation of response to stimulus|GO:0008064,regulation of actin polymerization or depolymerization|GO:0007165,signal transduction|GO:0007166,cell surface receptor signaling pathway|GO:0007167,enzyme linked receptor protein signaling pathway|GO:0030182,neuron differentiation|GO:0007169,transmembrane recepto…	GO:0005488,binding|GO:0030674,protein binding, bridging|GO:0005200,structural constituent of cytoskeleton|GO:0008092,cytoskeletal protein binding|GO:0051015,actin filament binding|GO:0005198,structural molecule activity|GO:0003779,actin binding|GO:0044877,macromolecular complex binding|GO:0019899,enzyme binding|GO:0005515,protein binding|GO:0032403,protein complex binding|GO:0060090,binding, brid…	GO:0005488,binding|GO:0030674,protein binding, bridging|GO:0005200,structural constituent of cytoskeleton|GO:0008092,cytoskeletal protein binding|GO:0051015,actin filament binding|GO:0005198,structural molecule activity|GO:0003779,actin binding|GO:0044877,macromolecular complex binding|GO:0019899,enzyme binding|GO:0005515,protein binding|GO:0032403,protein complex binding|GO:0060090,binding, brid…	hsa05132,Salmonella infection|hsa05131,Shigellosis|hsa05130,Pathogenic Escherichia coli infection|hsa05100,Bacterial invasion of epithelial cells|hsa04144,Endocytosis|hsa04666,Fc gamma R-mediated phagocytosis|hsa04810,Regulation of actin cytoskeleton	http://www.uniprot.org/uniprot/P59998
