# Supplementary material
Source: publisher figshare collection journal article supplement (https://tandf.figshare.com/articles/dataset/_/6062987)
Supplement: Supplementary file 1 [file 2 › Exc.3 The detail information of the 44 common differentially expressed proteins caused by storage temperature by General iTRAQ.xlsx]

## Sheet: Sheet1
NO	ID	Genename	Log2FoldChange	Biological Process	Cell Component	Molecular Function	KEGG Pathways	UNIPROT_URL
1	O95433	AHSA1	-0.942723	GO:0051336,regulation of hydrolase activity|GO:0043462,regulation of ATPase activity|GO:0009893,positive regulation of metabolic process|GO:0051345,positive regulation of hydrolase activity|GO:0065009,regulation of molecular function|GO:0032781,positive regulation of ATPase activity|GO:0050896,response to stimulus|GO:0050790,regulation of catalytic activity|GO:0008152,metabolic process|GO:0006950…	GO:0005783,endoplasmic reticulum|GO:0043229,intracellular organelle|GO:0043227,membrane-bounded organelle|GO:0043226,organelle|GO:0005737,cytoplasm|GO:0031982,vesicle|GO:0031988,membrane-bounded vesicle|GO:0012505,endomembrane system|GO:1903561,extracellular vesicle|GO:0070062,extracellular exosome|GO:0043230,extracellular organelle|GO:0043231,intracellular membrane-bounded organelle|GO:0005829,c…	GO:0005488,binding|GO:0005515,protein binding|GO:0030234,enzyme regulator activity|GO:0051087,chaperone binding|GO:0008047,enzyme activator activity|GO:0060590,ATPase regulator activity|GO:0098772,molecular function regulator|GO:0060589,nucleoside-triphosphatase regulator activity|GO:0001671,ATPase activator activity	0	http://www.uniprot.org/uniprot/O95433
2	O00483	NDUFA4	-2.61617	GO:0051234,establishment of localization|GO:1902600,hydrogen ion transmembrane transport|GO:0009141,nucleoside triphosphate metabolic process|GO:0009144,purine nucleoside triphosphate metabolic process|GO:0009167,purine ribonucleoside monophosphate metabolic process|GO:0034641,cellular nitrogen compound metabolic process|GO:0006807,nitrogen compound metabolic process|GO:0044281,small molecule met…	GO:0044464,cell part|GO:0031090,organelle membrane|GO:1990204,oxidoreductase complex|GO:0043229,intracellular organelle|GO:0070069,cytochrome complex|GO:0031988,membrane-bounded vesicle|GO:0043227,membrane-bounded organelle|GO:0043226,organelle|GO:0005737,cytoplasm|GO:0005751,mitochondrial respiratory chain complex IV|GO:0031982,vesicle|GO:0098796,membrane protein complex|GO:0031975,envelope|GO:0…	GO:0044877,macromolecular complex binding|GO:0005488,binding|GO:0003954,NADH dehydrogenase activity|GO:0016491,oxidoreductase activity|GO:0015077,monovalent inorganic cation transmembrane transporter activity|GO:0050136,NADH dehydrogenase (quinone) activity|GO:0008137,NADH dehydrogenase (ubiquinone) activity|GO:0032403,protein complex binding|GO:0015002,heme-copper terminal oxidase activity|GO:00…	hsa00190,Oxidative phosphorylation|hsa01100,Metabolic pathways|hsa04932,Non-alcoholic fatty liver disease (NAFLD)|hsa05016,Huntington's disease|hsa05010,Alzheimer's disease|hsa05012,Parkinson's disease	http://www.uniprot.org/uniprot/O00483
3	P18136	P18136	0.731748	GO:0009607,response to biotic stimulus|GO:0006909,phagocytosis|GO:0019730,antimicrobial humoral response|GO:0019731,antibacterial humoral response|GO:0006950,response to stress|GO:0048584,positive regulation of response to stimulus|GO:0048583,regulation of response to stimulus|GO:0023052,signaling|GO:0007165,signal transduction|GO:0007166,cell surface receptor signaling pathway|GO:0002455,humoral…	GO:0071944,cell periphery|GO:0042571,immunoglobulin complex, circulating|GO:0019814,immunoglobulin complex|GO:0005615,extracellular space|GO:0016020,membrane|GO:0072562,blood microparticle|GO:0071749,polymeric IgA immunoglobulin complex|GO:0071748,monomeric IgA immunoglobulin complex|GO:0071745,IgA immunoglobulin complex|GO:0071746,IgA immunoglobulin complex, circulating|GO:0005886,plasma membran…	GO:0003823,antigen binding|GO:0005488,binding|GO:0005515,protein binding|GO:0034987,immunoglobulin receptor binding|GO:0005102,receptor binding	0	http://www.uniprot.org/uniprot/P18136
4	Q9UNF0	PACSIN2	-1.10501	GO:0022607,cellular component assembly|GO:0051234,establishment of localization|GO:0030030,cell projection organization|GO:0051049,regulation of transport|GO:0072584,caveolin-mediated endocytosis|GO:0044091,membrane biogenesis|GO:0051129,negative regulation of cellular component organization|GO:0051128,regulation of cellular component organization|GO:0061024,membrane organization|GO:0007009,plasm…	GO:0005911,cell-cell junction|GO:0044463,cell projection part|GO:0055038,recycling endosome membrane|GO:0098590,plasma membrane region|GO:0044421,extracellular region part|GO:0055037,recycling endosome|GO:0031974,membrane-enclosed lumen|GO:0019898,extrinsic component of membrane|GO:0005901,caveola|GO:0043229,intracellular organelle|GO:0043228,non-membrane-bounded organelle|GO:0005924,cell-substra…	GO:0043168,anion binding|GO:0008092,cytoskeletal protein binding|GO:0005215,transporter activity|GO:0070300,phosphatidic acid binding|GO:0005543,phospholipid binding|GO:0008289,lipid binding|GO:0043167,ion binding|GO:0005488,binding|GO:0005515,protein binding|GO:0042802,identical protein binding	0	http://www.uniprot.org/uniprot/Q9UNF0
5	O00534	VWA5A	-0.644984	0	GO:0044446,intracellular organelle part|GO:0043231,intracellular membrane-bounded organelle|GO:0031981,nuclear lumen|GO:0043233,organelle lumen|GO:0005634,nucleus|GO:0044464,cell part|GO:0031974,membrane-enclosed lumen|GO:0005622,intracellular|GO:0005654,nucleoplasm|GO:0070013,intracellular organelle lumen|GO:0043229,intracellular organelle|GO:0044428,nuclear part|GO:0005623,cell|GO:0044424,intra…	0	0	http://www.uniprot.org/uniprot/O00534
6	P25705	ATP5A1	0.887096	GO:0050680,negative regulation of epithelial cell proliferation|GO:0009167,purine ribonucleoside monophosphate metabolic process|GO:0009165,nucleotide biosynthetic process|GO:0009163,nucleoside biosynthetic process|GO:0009161,ribonucleoside monophosphate metabolic process|GO:1901362,organic cyclic compound biosynthetic process|GO:0042451,purine nucleoside biosynthetic process|GO:0009168,purine ri…	GO:0098796,membrane protein complex|GO:0044464,cell part|GO:0031974,membrane-enclosed lumen|GO:0031975,envelope|GO:0043229,intracellular organelle|GO:0071944,cell periphery|GO:0031988,membrane-bounded vesicle|GO:0043227,membrane-bounded organelle|GO:0043226,organelle|GO:0008180,COP9 signalosome|GO:0045261,proton-transporting ATP synthase complex, catalytic core F(1)|GO:0033178,proton-transporting…	GO:0042287,MHC protein binding|GO:0003676,nucleic acid binding|GO:0035639,purine ribonucleoside triphosphate binding|GO:0036442,hydrogen-exporting ATPase activity|GO:0005488,binding|GO:0016887,ATPase activity|GO:0000166,nucleotide binding|GO:1901363,heterocyclic compound binding|GO:0032550,purine ribonucleoside binding|GO:0001882,nucleoside binding|GO:0043168,anion binding|GO:0042625,ATPase activ…	hsa05016,Huntington's disease|hsa01100,Metabolic pathways|hsa05010,Alzheimer's disease|hsa05012,Parkinson's disease|hsa00190,Oxidative phosphorylation	http://www.uniprot.org/uniprot/P25705
7	P09486	SPARC	1.26123	GO:0001503,ossification|GO:0009628,response to abiotic stimulus|GO:0007599,hemostasis|GO:0007596,blood coagulation|GO:0050680,negative regulation of epithelial cell proliferation|GO:0001501,skeletal system development|GO:0072359,circulatory system development|GO:0072358,cardiovascular system development|GO:0007165,signal transduction|GO:0014074,response to purine-containing compound|GO:0044707,si…	GO:0044421,extracellular region part|GO:0005886,plasma membrane|GO:0031974,membrane-enclosed lumen|GO:0031012,extracellular matrix|GO:0030139,endocytic vesicle|GO:0043229,intracellular organelle|GO:0071944,cell periphery|GO:0060205,cytoplasmic membrane-bounded vesicle lumen|GO:0043227,membrane-bounded organelle|GO:0043226,organelle|GO:0034399,nuclear periphery|GO:0030667,secretory granule membran…	GO:0043169,cation binding|GO:0005518,collagen binding|GO:0050840,extracellular matrix binding|GO:0043167,ion binding|GO:0044877,macromolecular complex binding|GO:0005509,calcium ion binding|GO:0005515,protein binding|GO:0032403,protein complex binding|GO:0046872,metal ion binding|GO:0005488,binding	0	http://www.uniprot.org/uniprot/P09486
8	B2RUZ4	SMIM1	0.649845	0	GO:0043230,extracellular organelle|GO:0031982,vesicle|GO:0044421,extracellular region part|GO:0043227,membrane-bounded organelle|GO:0016021,integral component of membrane|GO:0016020,membrane|GO:0031988,membrane-bounded vesicle|GO:0005576,extracellular region|GO:0044425,membrane part|GO:1903561,extracellular vesicle|GO:0065010,extracellular membrane-bounded organelle|GO:0043226,organelle|GO:003122…	0	0	http://www.uniprot.org/uniprot/B2RUZ4
9	Q9H3K6	BOLA2	0.585588	0	GO:0043230,extracellular organelle|GO:0031982,vesicle|GO:0044421,extracellular region part|GO:0043227,membrane-bounded organelle|GO:0031988,membrane-bounded vesicle|GO:0005576,extracellular region|GO:1903561,extracellular vesicle|GO:0065010,extracellular membrane-bounded organelle|GO:0043226,organelle|GO:0070062,extracellular exosome	0	0	http://www.uniprot.org/uniprot/Q9H3K6
10	P10124	SRGN	1.07635	GO:0006887,exocytosis|GO:0007599,hemostasis|GO:0051046,regulation of secretion|GO:0051048,negative regulation of secretion|GO:0051049,regulation of transport|GO:0007596,blood coagulation|GO:0001503,ossification|GO:0007165,signal transduction|GO:0030500,regulation of bone mineralization|GO:0030502,negative regulation of bone mineralization|GO:0051651,maintenance of location in cell|GO:0071840,cell…	GO:0000323,lytic vacuole|GO:0031974,membrane-enclosed lumen|GO:0043229,intracellular organelle|GO:0060205,cytoplasmic membrane-bounded vesicle lumen|GO:0005622,intracellular|GO:0043227,membrane-bounded organelle|GO:0043226,organelle|GO:0005737,cytoplasm|GO:0005764,lysosome|GO:0031983,vesicle lumen|GO:0031982,vesicle|GO:0031093,platelet alpha granule lumen|GO:0016023,cytoplasmic membrane-bounded v…	GO:0005488,binding|GO:0005515,protein binding|GO:0032403,protein complex binding|GO:0044877,macromolecular complex binding|GO:0005518,collagen binding	0	http://www.uniprot.org/uniprot/P10124
11	P01009	SERPINA1	1.15205	GO:0006954,inflammatory response|GO:0009892,negative regulation of metabolic process|GO:0080090,regulation of primary metabolic process|GO:0019222,regulation of metabolic process|GO:0006950,response to stress|GO:0031324,negative regulation of cellular metabolic process|GO:0031323,regulation of cellular metabolic process|GO:0032940,secretion by cell|GO:0032501,multicellular organismal process|GO:0…	GO:0005783,endoplasmic reticulum|GO:0044421,extracellular region part|GO:0031974,membrane-enclosed lumen|GO:0031012,extracellular matrix|GO:0043229,intracellular organelle|GO:0060205,cytoplasmic membrane-bounded vesicle lumen|GO:0043227,membrane-bounded organelle|GO:0043226,organelle|GO:0005737,cytoplasm|GO:0031983,vesicle lumen|GO:0070062,extracellular exosome|GO:0031093,platelet alpha granule l…	GO:0001948,glycoprotein binding|GO:0004866,endopeptidase inhibitor activity|GO:0097367,carbohydrate derivative binding|GO:0061135,endopeptidase regulator activity|GO:0061134,peptidase regulator activity|GO:0019899,enzyme binding|GO:0002020,protease binding|GO:0005515,protein binding|GO:0030414,peptidase inhibitor activity|GO:0004867,serine-type endopeptidase inhibitor activity|GO:0004857,enzyme i…	hsa04610,Complement and coagulation cascades	http://www.uniprot.org/uniprot/P01009
12	P02787	TF	1.24607	GO:0006887,exocytosis|GO:0019220,regulation of phosphate metabolic process|GO:0080090,regulation of primary metabolic process|GO:0019222,regulation of metabolic process|GO:0060249,anatomical structure homeostasis|GO:0048584,positive regulation of response to stimulus|GO:0048583,regulation of response to stimulus|GO:0032147,activation of protein kinase activity|GO:0032844,regulation of homeostatic…	GO:0098590,plasma membrane region|GO:0016020,membrane|GO:0044421,extracellular region part|GO:0055037,recycling endosome|GO:1990712,HFE-transferrin receptor complex|GO:0031974,membrane-enclosed lumen|GO:0045178,basal part of cell|GO:0030139,endocytic vesicle|GO:0043229,intracellular organelle|GO:0071944,cell periphery|GO:0005905,coated pit|GO:0060205,cytoplasmic membrane-bounded vesicle lumen|GO:…	GO:1990459,transferrin receptor binding|GO:0005488,binding|GO:0043169,cation binding|GO:0046914,transition metal ion binding|GO:0046915,transition metal ion transmembrane transporter activity|GO:0043167,ion binding|GO:0046873,metal ion transmembrane transporter activity|GO:0046872,metal ion binding|GO:0005215,transporter activity|GO:0008324,cation transmembrane transporter activity|GO:0008199,fer…	hsa04066,HIF-1 signaling pathway|hsa04978,Mineral absorption	http://www.uniprot.org/uniprot/P02787
13	P01834	IGKC	1.22256	GO:0044707,single-multicellular organism process|GO:0006909,phagocytosis|GO:0060249,anatomical structure homeostasis|GO:0006950,response to stress|GO:0048584,positive regulation of response to stimulus|GO:0048583,regulation of response to stimulus|GO:0042592,homeostatic process|GO:0023052,signaling|GO:0007165,signal transduction|GO:0007166,cell surface receptor signaling pathway|GO:0001894,tissue…	GO:0043230,extracellular organelle|GO:0031982,vesicle|GO:0044421,extracellular region part|GO:0043227,membrane-bounded organelle|GO:0016020,membrane|GO:0044464,cell part|GO:0005623,cell|GO:0031988,membrane-bounded vesicle|GO:0071944,cell periphery|GO:0005615,extracellular space|GO:0072562,blood microparticle|GO:0005886,plasma membrane|GO:0005576,extracellular region|GO:1903561,extracellular vesic…	GO:0005488,binding|GO:0003823,antigen binding	0	http://www.uniprot.org/uniprot/P01834
14	P01024	C3	0.87998	GO:0032026,response to magnesium ion|GO:0019220,regulation of phosphate metabolic process|GO:0080090,regulation of primary metabolic process|GO:0019222,regulation of metabolic process|GO:0048589,developmental growth|GO:0051049,regulation of transport|GO:0048584,positive regulation of response to stimulus|GO:0048583,regulation of response to stimulus|GO:0002437,inflammatory response to antigenic s…	GO:0043230,extracellular organelle|GO:0031982,vesicle|GO:0044421,extracellular region part|GO:0043227,membrane-bounded organelle|GO:0016020,membrane|GO:0044464,cell part|GO:0005623,cell|GO:0031988,membrane-bounded vesicle|GO:0071944,cell periphery|GO:0005615,extracellular space|GO:0072562,blood microparticle|GO:0005886,plasma membrane|GO:0005576,extracellular region|GO:1903561,extracellular vesic…	GO:0005102,receptor binding|GO:0004866,endopeptidase inhibitor activity|GO:0061135,endopeptidase regulator activity|GO:0061134,peptidase regulator activity|GO:0008289,lipid binding|GO:0031714,C5a anaphylatoxin chemotactic receptor binding|GO:0048037,cofactor binding|GO:0005515,protein binding|GO:0030414,peptidase inhibitor activity|GO:0031715,C5L2 anaphylatoxin chemotactic receptor binding|GO:000…	hsa05133,Pertussis|hsa04610,Complement and coagulation cascades|hsa05134,Legionellosis|hsa05322,Systemic lupus erythematosus|hsa05203,Viral carcinogenesis|hsa05142,Chagas disease (American trypanosomiasis)|hsa05140,Leishmaniasis|hsa04145,Phagosome|hsa05150,Staphylococcus aureus infection|hsa05152,Tuberculosis|hsa05168,Herpes simplex infection	http://www.uniprot.org/uniprot/P01024
15	P01137	TGFB1	1.05651	GO:0033157,regulation of intracellular protein transport|GO:0051169,nuclear transport|GO:0051168,nuclear export|GO:0006909,phagocytosis|GO:0045216,cell-cell junction organization|GO:0051046,regulation of secretion|GO:0051047,positive regulation of secretion|GO:0051049,regulation of transport|GO:0001667,ameboidal-type cell migration|GO:0007596,blood coagulation|GO:0032355,response to estradiol|GO:…	0	0	0	0
16	P00751	CFB	2.33871	GO:0006954,inflammatory response|GO:0030449,regulation of complement activation|GO:0080090,regulation of primary metabolic process|GO:0019222,regulation of metabolic process|GO:0032101,regulation of response to external stimulus|GO:0048584,positive regulation of response to stimulus|GO:0048583,regulation of response to stimulus|GO:0009611,response to wounding|GO:0016485,protein processing|GO:0002…	GO:0043230,extracellular organelle|GO:0031982,vesicle|GO:0044421,extracellular region part|GO:0043227,membrane-bounded organelle|GO:0016020,membrane|GO:0044464,cell part|GO:0005623,cell|GO:0031988,membrane-bounded vesicle|GO:0071944,cell periphery|GO:0005615,extracellular space|GO:0072562,blood microparticle|GO:0005886,plasma membrane|GO:0005576,extracellular region|GO:1903561,extracellular vesic…	GO:0004252,serine-type endopeptidase activity|GO:0004175,endopeptidase activity|GO:0017171,serine hydrolase activity|GO:0016787,hydrolase activity|GO:0003824,catalytic activity|GO:0070011,peptidase activity, acting on L-amino acid peptides|GO:0005488,binding|GO:0005515,protein binding|GO:0001848,complement binding|GO:0008233,peptidase activity|GO:0008236,serine-type peptidase activity	hsa04610,Complement and coagulation cascades|hsa05150,Staphylococcus aureus infection	http://www.uniprot.org/uniprot/P00751
17	O75947	ATP5H	0.599365	GO:0009167,purine ribonucleoside monophosphate metabolic process|GO:0009165,nucleotide biosynthetic process|GO:0009163,nucleoside biosynthetic process|GO:0009161,ribonucleoside monophosphate metabolic process|GO:1901362,organic cyclic compound biosynthetic process|GO:0042451,purine nucleoside biosynthetic process|GO:0009168,purine ribonucleoside monophosphate biosynthetic process|GO:0044710,singl…	GO:0098796,membrane protein complex|GO:0044464,cell part|GO:0031974,membrane-enclosed lumen|GO:0031975,envelope|GO:0043229,intracellular organelle|GO:0031988,membrane-bounded vesicle|GO:0043227,membrane-bounded organelle|GO:0043226,organelle|GO:0005737,cytoplasm|GO:0005654,nucleoplasm|GO:0045263,proton-transporting ATP synthase complex, coupling factor F(o)|GO:0070062,extracellular exosome|GO:003…	GO:0022891,substrate-specific transmembrane transporter activity|GO:0022890,inorganic cation transmembrane transporter activity|GO:0016818,hydrolase activity, acting on acid anhydrides, in phosphorus-containing anhydrides|GO:0022892,substrate-specific transporter activity|GO:0016787,hydrolase activity|GO:0005215,transporter activity|GO:0003824,catalytic activity|GO:0008324,cation transmembrane tr…	hsa05016,Huntington's disease|hsa01100,Metabolic pathways|hsa05010,Alzheimer's disease|hsa05012,Parkinson's disease|hsa00190,Oxidative phosphorylation	http://www.uniprot.org/uniprot/O75947
18	Q8NEU8	APPL2	0.977646	GO:0044700,single organism signaling|GO:0044699,single-organism process|GO:0008283,cell proliferation|GO:0050896,response to stimulus|GO:0009987,cellular process|GO:0044763,single-organism cellular process|GO:0051716,cellular response to stimulus|GO:0050794,regulation of cellular process|GO:0065007,biological regulation|GO:0023052,signaling|GO:0007165,signal transduction|GO:0007154,cell communica…	GO:0044421,extracellular region part|GO:0031974,membrane-enclosed lumen|GO:0043229,intracellular organelle|GO:0005622,intracellular|GO:0043227,membrane-bounded organelle|GO:0043226,organelle|GO:0010008,endosome membrane|GO:0005737,cytoplasm|GO:1903561,extracellular vesicle|GO:0070603,SWI/SNF superfamily-type complex|GO:0031982,vesicle|GO:0031981,nuclear lumen|GO:0005634,nucleus|GO:0016020,membran…	GO:0005488,binding|GO:0005515,protein binding	0	http://www.uniprot.org/uniprot/Q8NEU8
19	P01859	IGHG2	0.750178	GO:0044238,primary metabolic process|GO:0006909,phagocytosis|GO:0006950,response to stress|GO:0048584,positive regulation of response to stimulus|GO:0048583,regulation of response to stimulus|GO:0023052,signaling|GO:0007165,signal transduction|GO:0007166,cell surface receptor signaling pathway|GO:0002455,humoral immune response mediated by circulating immunoglobulin|GO:0050789,regulation of biolo…	GO:0043230,extracellular organelle|GO:0031982,vesicle|GO:0044421,extracellular region part|GO:0043227,membrane-bounded organelle|GO:0072562,blood microparticle|GO:0031988,membrane-bounded vesicle|GO:0005576,extracellular region|GO:0005615,extracellular space|GO:1903561,extracellular vesicle|GO:0065010,extracellular membrane-bounded organelle|GO:0043226,organelle|GO:0070062,extracellular exosome	GO:0005515,protein binding|GO:0003823,antigen binding|GO:0005488,binding	0	http://www.uniprot.org/uniprot/P01859
20	P01857	IGHG1	1.19001	GO:0044238,primary metabolic process|GO:0006909,phagocytosis|GO:0006950,response to stress|GO:0048584,positive regulation of response to stimulus|GO:0048583,regulation of response to stimulus|GO:0023052,signaling|GO:0007165,signal transduction|GO:0007166,cell surface receptor signaling pathway|GO:0002455,humoral immune response mediated by circulating immunoglobulin|GO:0050789,regulation of biolo…	GO:0043230,extracellular organelle|GO:0031982,vesicle|GO:0044421,extracellular region part|GO:0043227,membrane-bounded organelle|GO:0072562,blood microparticle|GO:0031988,membrane-bounded vesicle|GO:0005576,extracellular region|GO:0005615,extracellular space|GO:1903561,extracellular vesicle|GO:0065010,extracellular membrane-bounded organelle|GO:0043226,organelle|GO:0070062,extracellular exosome	GO:0005515,protein binding|GO:0003823,antigen binding|GO:0005488,binding	0	http://www.uniprot.org/uniprot/P01857
21	P07225	PROS1	0.953489	GO:0006909,phagocytosis|GO:0080090,regulation of primary metabolic process|GO:0019222,regulation of metabolic process|GO:0051049,regulation of transport|GO:0048585,negative regulation of response to stimulus|GO:0048584,positive regulation of response to stimulus|GO:0048583,regulation of response to stimulus|GO:0007599,hemostasis|GO:0031347,regulation of defense response|GO:0044710,single-organism…	GO:0005783,endoplasmic reticulum|GO:0005886,plasma membrane|GO:0031974,membrane-enclosed lumen|GO:0005789,endoplasmic reticulum membrane|GO:0042175,nuclear outer membrane-endoplasmic reticulum membrane network|GO:0043229,intracellular organelle|GO:0071944,cell periphery|GO:0060205,cytoplasmic membrane-bounded vesicle lumen|GO:0005622,intracellular|GO:0043227,membrane-bounded organelle|GO:0043226,…	GO:0043169,cation binding|GO:0046872,metal ion binding|GO:0004866,endopeptidase inhibitor activity|GO:0005515,protein binding|GO:0061135,endopeptidase regulator activity|GO:0061134,peptidase regulator activity|GO:0043167,ion binding|GO:0044877,macromolecular complex binding|GO:0005509,calcium ion binding|GO:0030414,peptidase inhibitor activity|GO:0032403,protein complex binding|GO:0004857,enzyme …	hsa04610,Complement and coagulation cascades	http://www.uniprot.org/uniprot/P07225
22	Q15388	TOMM20	-1.03667	GO:0008104,protein localization|GO:0051649,establishment of localization in cell|GO:0051641,cellular localization|GO:0044699,single-organism process|GO:0044267,cellular protein metabolic process|GO:0071806,protein transmembrane transport|GO:0044260,cellular macromolecule metabolic process|GO:0070727,cellular macromolecule localization|GO:0071840,cellular component organization or biogenesis|GO:00…	GO:0005783,endoplasmic reticulum|GO:0005789,endoplasmic reticulum membrane|GO:0042175,nuclear outer membrane-endoplasmic reticulum membrane network|GO:0043229,intracellular organelle|GO:0043227,membrane-bounded organelle|GO:0043226,organelle|GO:0031224,intrinsic component of membrane|GO:0005737,cytoplasm|GO:0005742,mitochondrial outer membrane translocase complex|GO:0031090,organelle membrane|GO:…	GO:0008565,protein transporter activity|GO:0022891,substrate-specific transmembrane transporter activity|GO:0015450,P-P-bond-hydrolysis-driven protein transmembrane transporter activity|GO:0022884,macromolecule transmembrane transporter activity|GO:0005215,transporter activity|GO:0051082,unfolded protein binding|GO:0008320,protein transmembrane transporter activity|GO:0015399,primary active trans…	0	http://www.uniprot.org/uniprot/Q15388
23	P05067	APP	1.07933	GO:0007599,hemostasis|GO:0007596,blood coagulation|GO:0016358,dendrite development|GO:0044281,small molecule metabolic process|GO:0098771,inorganic ion homeostasis|GO:0051716,cellular response to stimulus|GO:0048589,developmental growth|GO:0018212,peptidyl-tyrosine modification|GO:0048468,cell development|GO:0045859,regulation of protein kinase activity|GO:0007528,neuromuscular junction developme…	GO:0005783,endoplasmic reticulum|GO:0031970,organelle envelope lumen|GO:0031974,membrane-enclosed lumen|GO:0031975,envelope|GO:0031594,neuromuscular junction|GO:0030054,cell junction|GO:0031984,organelle subcompartment|GO:0031983,vesicle lumen|GO:0031982,vesicle|GO:0016023,cytoplasmic membrane-bounded vesicle|GO:0016021,integral component of membrane|GO:0016020,membrane|GO:0031988,membrane-bounde…	GO:0030414,peptidase inhibitor activity|GO:0033130,acetylcholine receptor binding|GO:0019899,enzyme binding|GO:0008047,enzyme activator activity|GO:0003676,nucleic acid binding|GO:0003677,DNA binding|GO:0004857,enzyme inhibitor activity|GO:0098772,molecular function regulator|GO:1901363,heterocyclic compound binding|GO:1901681,sulfur compound binding|GO:0043169,cation binding|GO:0046914,transitio…	hsa05010,Alzheimer's disease|hsa04726,Serotonergic synapse	http://www.uniprot.org/uniprot/P05067
24	P10909	CLU	1.143	GO:0007599,hemostasis|GO:0007596,blood coagulation|GO:0019220,regulation of phosphate metabolic process|GO:0051716,cellular response to stimulus|GO:0019222,regulation of metabolic process|GO:0043207,response to external biotic stimulus|GO:0060548,negative regulation of cell death|GO:0045859,regulation of protein kinase activity|GO:0008366,axon ensheathment|GO:0046483,heterocycle metabolic process…	GO:0005783,endoplasmic reticulum|GO:0016234,inclusion body|GO:0031974,membrane-enclosed lumen|GO:0031012,extracellular matrix|GO:0043229,intracellular organelle|GO:1990777,lipoprotein particle|GO:0072562,blood microparticle|GO:0060205,cytoplasmic membrane-bounded vesicle lumen|GO:0005622,intracellular|GO:0043227,membrane-bounded organelle|GO:0043226,organelle|GO:0034358,plasma lipoprotein particl…	GO:0016787,hydrolase activity|GO:0016818,hydrolase activity, acting on acid anhydrides, in phosphorus-containing anhydrides|GO:0031625,ubiquitin protein ligase binding|GO:0044389,ubiquitin-like protein ligase binding|GO:0005515,protein binding|GO:0003824,catalytic activity|GO:0051087,chaperone binding|GO:0017111,nucleoside-triphosphatase activity|GO:0019899,enzyme binding|GO:0016817,hydrolase act…	0	http://www.uniprot.org/uniprot/P10909
25	P0C0L4	C4A	0.780646	GO:0006909,phagocytosis|GO:0080090,regulation of primary metabolic process|GO:0019222,regulation of metabolic process|GO:0051049,regulation of transport|GO:0048584,positive regulation of response to stimulus|GO:0048583,regulation of response to stimulus|GO:0002455,humoral immune response mediated by circulating immunoglobulin|GO:0031347,regulation of defense response|GO:0044710,single-organism me…	GO:0043230,extracellular organelle|GO:0031982,vesicle|GO:0044421,extracellular region part|GO:0043227,membrane-bounded organelle|GO:0016020,membrane|GO:0044464,cell part|GO:0005623,cell|GO:0031988,membrane-bounded vesicle|GO:0071944,cell periphery|GO:0005615,extracellular space|GO:0072562,blood microparticle|GO:0005886,plasma membrane|GO:0005576,extracellular region|GO:1903561,extracellular vesic…	GO:0005488,binding|GO:0004866,endopeptidase inhibitor activity|GO:0061135,endopeptidase regulator activity|GO:0061134,peptidase regulator activity|GO:0001849,complement component C1q binding|GO:0001848,complement binding|GO:0005515,protein binding|GO:0030414,peptidase inhibitor activity|GO:0004857,enzyme inhibitor activity|GO:0098772,molecular function regulator|GO:0030234,enzyme regulator activi…	hsa05133,Pertussis|hsa05322,Systemic lupus erythematosus|hsa04610,Complement and coagulation cascades|hsa05150,Staphylococcus aureus infection	http://www.uniprot.org/uniprot/P0C0L4
26	Q14766	LTBP1	1.28179	GO:0033036,macromolecule localization|GO:0008104,protein localization|GO:0070887,cellular response to chemical stimulus|GO:0048585,negative regulation of response to stimulus|GO:0007167,enzyme linked receptor protein signaling pathway|GO:0048583,regulation of response to stimulus|GO:0070848,response to growth factor|GO:0023057,negative regulation of signaling|GO:0065007,biological regulation|GO:0…	GO:0043234,protein complex|GO:0043205,fibril|GO:0044421,extracellular region part|GO:0031012,extracellular matrix|GO:0032991,macromolecular complex|GO:0005576,extracellular region|GO:0001527,microfibril|GO:0044420,extracellular matrix component|GO:0005578,proteinaceous extracellular matrix	GO:0038023,signaling receptor activity|GO:0019955,cytokine binding|GO:0060089,molecular transducer activity|GO:0004872,receptor activity|GO:0004871,signal transducer activity|GO:0050436,microfibril binding|GO:0050431,transforming growth factor beta binding|GO:0043169,cation binding|GO:0019838,growth factor binding|GO:0043167,ion binding|GO:0004675,transmembrane receptor protein serine/threonine k…	hsa04350,TGF-beta signaling pathway	http://www.uniprot.org/uniprot/Q14766
27	P99999	CYCS	1.33325	GO:0080090,regulation of primary metabolic process|GO:0019222,regulation of metabolic process|GO:0009167,purine ribonucleoside monophosphate metabolic process|GO:0007165,signal transduction|GO:0009161,ribonucleoside monophosphate metabolic process|GO:1901576,organic substance biosynthetic process|GO:1901362,organic cyclic compound biosynthetic process|GO:0007005,mitochondrion organization|GO:1901…	GO:0044464,cell part|GO:0031970,organelle envelope lumen|GO:1903293,phosphatase complex|GO:0031974,membrane-enclosed lumen|GO:0031975,envelope|GO:0043229,intracellular organelle|GO:0043227,membrane-bounded organelle|GO:0043226,organelle|GO:0005737,cytoplasm|GO:0031090,organelle membrane|GO:0005634,nucleus|GO:0016020,membrane|GO:0044444,cytoplasmic part|GO:0005739,mitochondrion|GO:0005758,mitochon…	GO:0016787,hydrolase activity|GO:0009055,electron carrier activity|GO:0016791,phosphatase activity|GO:0020037,heme binding|GO:0046906,tetrapyrrole binding|GO:0097159,organic cyclic compound binding|GO:0004722,protein serine/threonine phosphatase activity|GO:0004721,phosphoprotein phosphatase activity|GO:0043167,ion binding|GO:0042578,phosphoric ester hydrolase activity|GO:0003824,catalytic activi…	hsa05416,Viral myocarditis|hsa05134,Legionellosis|hsa01100,Metabolic pathways|hsa05152,Tuberculosis|hsa05200,Pathways in cancer|hsa05210,Colorectal cancer|hsa04115,p53 signaling pathway|hsa05164,Influenza A|hsa00920,Sulfur metabolism|hsa05168,Herpes simplex infection|hsa05012,Parkinson's disease|hsa05145,Toxoplasmosis|hsa05014,Amyotrophic lateral sclerosis (ALS)|hsa04210,Apoptosis|hsa05016,Huntin…	http://www.uniprot.org/uniprot/P99999
28	P30084	ECHS1	2.23295	GO:0034440,lipid oxidation|GO:0006631,fatty acid metabolic process|GO:0006635,fatty acid beta-oxidation|GO:0019752,carboxylic acid metabolic process|GO:0044248,cellular catabolic process|GO:0009062,fatty acid catabolic process|GO:0044281,small molecule metabolic process|GO:0044282,small molecule catabolic process|GO:0044242,cellular lipid catabolic process|GO:0044699,single-organism process|GO:00…	GO:0031974,membrane-enclosed lumen|GO:0043229,intracellular organelle|GO:0043227,membrane-bounded organelle|GO:0043226,organelle|GO:0005737,cytoplasm|GO:0070062,extracellular exosome|GO:0005739,mitochondrion|GO:0031988,membrane-bounded vesicle|GO:0005759,mitochondrial matrix|GO:1903561,extracellular vesicle|GO:0031982,vesicle|GO:0043230,extracellular organelle|GO:0043231,intracellular membrane-bo…	GO:0003824,catalytic activity|GO:0016835,carbon-oxygen lyase activity|GO:0016836,hydro-lyase activity|GO:0004300,enoyl-CoA hydratase activity|GO:0005488,binding|GO:0005515,protein binding|GO:0016829,lyase activity	hsa00310,Lysine degradation|hsa00062,Fatty acid elongation|hsa01100,Metabolic pathways|hsa00071,Fatty acid degradation|hsa01200,Carbon metabolism|hsa00280,Valine, leucine and isoleucine degradation|hsa01130,Biosynthesis of antibiotics|hsa00640,Propanoate metabolism|hsa00380,Tryptophan metabolism|hsa01212,Fatty acid metabolism|hsa00650,Butanoate metabolism|hsa00410,beta-Alanine metabolism	http://www.uniprot.org/uniprot/P30084
29	P11277	SPTB	1.07755	GO:0048468,cell development|GO:0006778,porphyrin-containing compound metabolic process|GO:0006779,porphyrin-containing compound biosynthetic process|GO:0008064,regulation of actin polymerization or depolymerization|GO:0061024,membrane organization|GO:0007009,plasma membrane organization|GO:0030182,neuron differentiation|GO:0090066,regulation of anatomical structure size|GO:1901362,organic cyclic …	GO:0015629,actin cytoskeleton|GO:0009898,cytoplasmic side of plasma membrane|GO:0043229,intracellular organelle|GO:0043228,non-membrane-bounded organelle|GO:0098552,side of membrane|GO:0005622,intracellular|GO:0031226,intrinsic component of plasma membrane|GO:0043226,organelle|GO:0031224,intrinsic component of membrane|GO:0005856,cytoskeleton|GO:0016020,membrane|GO:0044430,cytoskeletal part|GO:00…	GO:0005200,structural constituent of cytoskeleton|GO:0008092,cytoskeletal protein binding|GO:0051015,actin filament binding|GO:0005198,structural molecule activity|GO:0003779,actin binding|GO:0044877,macromolecular complex binding|GO:0005488,binding|GO:0005515,protein binding|GO:0032403,protein complex binding|GO:0046983,protein dimerization activity|GO:0046982,protein heterodimerization activity…	0	http://www.uniprot.org/uniprot/P11277
30	P02760	AMBP	1.2888	GO:0019220,regulation of phosphate metabolic process|GO:0080090,regulation of primary metabolic process|GO:0019222,regulation of metabolic process|GO:0048585,negative regulation of response to stimulus|GO:0048583,regulation of response to stimulus|GO:0006778,porphyrin-containing compound metabolic process|GO:0007165,signal transduction|GO:0023014,signal transduction by protein phosphorylation|GO:…	GO:0043229,intracellular organelle|GO:0071944,cell periphery|GO:0043227,membrane-bounded organelle|GO:0043226,organelle|GO:0031982,vesicle|GO:0016020,membrane|GO:0072562,blood microparticle|GO:0031988,membrane-bounded vesicle|GO:0009986,cell surface|GO:0005886,plasma membrane|GO:1903561,extracellular vesicle|GO:0005615,extracellular space|GO:0043230,extracellular organelle|GO:0043231,intracellula…	GO:0004866,endopeptidase inhibitor activity|GO:0044877,macromolecular complex binding|GO:0005488,binding|GO:0004857,enzyme inhibitor activity|GO:0098772,molecular function regulator|GO:1901363,heterocyclic compound binding|GO:0019855,calcium channel inhibitor activity|GO:0016248,channel inhibitor activity|GO:0032403,protein complex binding|GO:0030234,enzyme regulator activity|GO:0042802,identical…	0	http://www.uniprot.org/uniprot/P02760
31	P69905	HBA1	-0.620601	GO:0015701,bicarbonate transport|GO:0022607,cellular component assembly|GO:0070271,protein complex biogenesis|GO:0043933,macromolecular complex subunit organization|GO:0000302,response to reactive oxygen species|GO:0044248,cellular catabolic process|GO:0006820,anion transport|GO:0042744,hydrogen peroxide catabolic process|GO:0042743,hydrogen peroxide metabolic process|GO:0044281,small molecule me…	GO:0022626,cytosolic ribosome|GO:0022627,cytosolic small ribosomal subunit|GO:0031974,membrane-enclosed lumen|GO:0030139,endocytic vesicle|GO:0043229,intracellular organelle|GO:0043228,non-membrane-bounded organelle|GO:0060205,cytoplasmic membrane-bounded vesicle lumen|GO:0005833,hemoglobin complex|GO:0043227,membrane-bounded organelle|GO:0043226,organelle|GO:0015935,small ribosomal subunit|GO:00…	GO:0005344,oxygen transporter activity|GO:0005488,binding|GO:1901363,heterocyclic compound binding|GO:0016491,oxidoreductase activity|GO:0043169,cation binding|GO:0016684,oxidoreductase activity, acting on peroxide as acceptor|GO:0046914,transition metal ion binding|GO:0043167,ion binding|GO:0005506,iron ion binding|GO:0046872,metal ion binding|GO:0020037,heme binding|GO:0005215,transporter activ…	hsa05143,African trypanosomiasis|hsa05144,Malaria	http://www.uniprot.org/uniprot/P69905
32	P02790	HPX	0.685043	GO:0019220,regulation of phosphate metabolic process|GO:0019221,cytokine-mediated signaling pathway|GO:0019222,regulation of metabolic process|GO:0048584,positive regulation of response to stimulus|GO:0048583,regulation of response to stimulus|GO:0006778,porphyrin-containing compound metabolic process|GO:0031349,positive regulation of defense response|GO:0002706,regulation of lymphocyte mediated …	GO:0031974,membrane-enclosed lumen|GO:0030139,endocytic vesicle|GO:0043229,intracellular organelle|GO:0060205,cytoplasmic membrane-bounded vesicle lumen|GO:0043227,membrane-bounded organelle|GO:0043226,organelle|GO:0005737,cytoplasm|GO:0031983,vesicle lumen|GO:0070062,extracellular exosome|GO:0071682,endocytic vesicle lumen|GO:0016023,cytoplasmic membrane-bounded vesicle|GO:0031410,cytoplasmic ve…	GO:0051184,cofactor transporter activity|GO:0015232,heme transporter activity|GO:0043169,cation binding|GO:0005215,transporter activity|GO:0043167,ion binding|GO:0005488,binding|GO:0005515,protein binding|GO:0046872,metal ion binding	0	http://www.uniprot.org/uniprot/P02790
33	P02671	FGA	1.76407	GO:2001234,negative regulation of apoptotic signaling pathway|GO:0034116,positive regulation of heterotypic cell-cell adhesion|GO:2001236,regulation of extrinsic apoptotic signaling pathway|GO:2001237,negative regulation of extrinsic apoptotic signaling pathway|GO:0019220,regulation of phosphate metabolic process|GO:0080090,regulation of primary metabolic process|GO:0019222,regulation of metaboli…	GO:0009897,external side of plasma membrane|GO:0005783,endoplasmic reticulum|GO:0098552,side of membrane|GO:0031974,membrane-enclosed lumen|GO:0043229,intracellular organelle|GO:0071944,cell periphery|GO:0060205,cytoplasmic membrane-bounded vesicle lumen|GO:0043227,membrane-bounded organelle|GO:0043226,organelle|GO:0005737,cytoplasm|GO:0031983,vesicle lumen|GO:0070062,extracellular exosome|GO:003…	GO:0030674,protein binding, bridging|GO:0005198,structural molecule activity|GO:0005488,binding|GO:0005515,protein binding|GO:0005102,receptor binding|GO:0050839,cell adhesion molecule binding|GO:0060090,binding, bridging	hsa04611,Platelet activation|hsa04610,Complement and coagulation cascades	http://www.uniprot.org/uniprot/P02671
34	P02652	APOA2	1.34849	GO:1901566,organonitrogen compound biosynthetic process|GO:0008104,protein localization|GO:0080090,regulation of primary metabolic process|GO:0019222,regulation of metabolic process|GO:0046340,diacylglycerol catabolic process|GO:0051048,negative regulation of secretion|GO:0051049,regulation of transport|GO:0048585,negative regulation of response to stimulus|GO:0048583,regulation of response to st…	GO:0005783,endoplasmic reticulum|GO:0044421,extracellular region part|GO:0031974,membrane-enclosed lumen|GO:0043229,intracellular organelle|GO:1990777,lipoprotein particle|GO:0005622,intracellular|GO:0043227,membrane-bounded organelle|GO:0043226,organelle|GO:0034358,plasma lipoprotein particle|GO:0005737,cytoplasm|GO:0042627,chylomicron|GO:0070062,extracellular exosome|GO:0005615,extracellular sp…	GO:0017127,cholesterol transporter activity|GO:0044877,macromolecular complex binding|GO:0008047,enzyme activator activity|GO:0004857,enzyme inhibitor activity|GO:0098772,molecular function regulator|GO:0060228,phosphatidylcholine-sterol O-acyltransferase activator activity|GO:0034190,apolipoprotein receptor binding|GO:0043168,anion binding|GO:0043169,cation binding|GO:0055102,lipase inhibitor ac…	hsa03320,PPAR signaling pathway	http://www.uniprot.org/uniprot/P02652
35	P12259	F5	1.70933	GO:0007599,hemostasis|GO:0006950,response to stress|GO:0007596,blood coagulation|GO:0032940,secretion by cell|GO:0003013,circulatory system process|GO:0051641,cellular localization|GO:0044699,single-organism process|GO:0002576,platelet degranulation|GO:0006887,exocytosis|GO:0009611,response to wounding|GO:0065007,biological regulation|GO:0030168,platelet activation|GO:0006810,transport|GO:0065008…	GO:0005886,plasma membrane|GO:0031974,membrane-enclosed lumen|GO:0043229,intracellular organelle|GO:0071944,cell periphery|GO:0060205,cytoplasmic membrane-bounded vesicle lumen|GO:0043227,membrane-bounded organelle|GO:0043226,organelle|GO:0005737,cytoplasm|GO:0031983,vesicle lumen|GO:0031982,vesicle|GO:0031093,platelet alpha granule lumen|GO:0016023,cytoplasmic membrane-bounded vesicle|GO:0031410…	GO:0043169,cation binding|GO:0005507,copper ion binding|GO:0046914,transition metal ion binding|GO:0043167,ion binding|GO:0005488,binding|GO:0005515,protein binding|GO:0046872,metal ion binding	hsa04610,Complement and coagulation cascades	http://www.uniprot.org/uniprot/P12259
36	P02679	FGG	1.94124	GO:2001234,negative regulation of apoptotic signaling pathway|GO:0034116,positive regulation of heterotypic cell-cell adhesion|GO:2001236,regulation of extrinsic apoptotic signaling pathway|GO:2001237,negative regulation of extrinsic apoptotic signaling pathway|GO:0019220,regulation of phosphate metabolic process|GO:0080090,regulation of primary metabolic process|GO:0019222,regulation of metaboli…	GO:0009897,external side of plasma membrane|GO:0098552,side of membrane|GO:0031974,membrane-enclosed lumen|GO:0043229,intracellular organelle|GO:0071944,cell periphery|GO:0060205,cytoplasmic membrane-bounded vesicle lumen|GO:0043227,membrane-bounded organelle|GO:0043226,organelle|GO:0005737,cytoplasm|GO:0031983,vesicle lumen|GO:0070062,extracellular exosome|GO:0031093,platelet alpha granule lumen…	GO:0043169,cation binding|GO:0030674,protein binding, bridging|GO:0050839,cell adhesion molecule binding|GO:0005198,structural molecule activity|GO:0043167,ion binding|GO:0005488,binding|GO:0005515,protein binding|GO:0005102,receptor binding|GO:0046872,metal ion binding|GO:0060090,binding, bridging	hsa04611,Platelet activation|hsa04610,Complement and coagulation cascades|hsa05150,Staphylococcus aureus infection	http://www.uniprot.org/uniprot/P02679
37	P07996	THBS1	2.61288	GO:0006909,phagocytosis|GO:0051049,regulation of transport|GO:0001667,ameboidal-type cell migration|GO:0007596,blood coagulation|GO:0001501,skeletal system development|GO:0032026,response to magnesium ion|GO:0042035,regulation of cytokine biosynthetic process|GO:0044281,small molecule metabolic process|GO:0051641,cellular localization|GO:0007599,hemostasis|GO:0048266,behavioral response to pain|G…	GO:0009897,external side of plasma membrane|GO:0005783,endoplasmic reticulum|GO:0098552,side of membrane|GO:0005788,endoplasmic reticulum lumen|GO:0031012,extracellular matrix|GO:0043229,intracellular organelle|GO:0071944,cell periphery|GO:0060205,cytoplasmic membrane-bounded vesicle lumen|GO:0043227,membrane-bounded organelle|GO:0043226,organelle|GO:0005737,cytoplasm|GO:0031983,vesicle lumen|GO:…	GO:0050840,extracellular matrix binding|GO:0031406,carboxylic acid binding|GO:0019955,cytokine binding|GO:0044877,macromolecular complex binding|GO:0005488,binding|GO:0030169,low-density lipoprotein particle binding|GO:0016597,amino acid binding|GO:0043168,anion binding|GO:0001948,glycoprotein binding|GO:1901681,sulfur compound binding|GO:0043169,cation binding|GO:0005543,phospholipid binding|GO:…	hsa04350,TGF-beta signaling pathway|hsa05219,Bladder cancer|hsa05144,Malaria|hsa05205,Proteoglycans in cancer|hsa05206,MicroRNAs in cancer|hsa04115,p53 signaling pathway|hsa04015,Rap1 signaling pathway|hsa04145,Phagosome|hsa04510,Focal adhesion|hsa04512,ECM-receptor interaction|hsa04151,PI3K-Akt signaling pathway	http://www.uniprot.org/uniprot/P07996
38	P02675	FGB	2.28604	GO:2001234,negative regulation of apoptotic signaling pathway|GO:0034116,positive regulation of heterotypic cell-cell adhesion|GO:2001236,regulation of extrinsic apoptotic signaling pathway|GO:2001237,negative regulation of extrinsic apoptotic signaling pathway|GO:0019220,regulation of phosphate metabolic process|GO:0080090,regulation of primary metabolic process|GO:0019222,regulation of metaboli…	GO:0009897,external side of plasma membrane|GO:0098552,side of membrane|GO:0031974,membrane-enclosed lumen|GO:0043229,intracellular organelle|GO:0071944,cell periphery|GO:0060205,cytoplasmic membrane-bounded vesicle lumen|GO:0043227,membrane-bounded organelle|GO:0043226,organelle|GO:0005737,cytoplasm|GO:0031983,vesicle lumen|GO:0070062,extracellular exosome|GO:0031093,platelet alpha granule lumen…	GO:0030674,protein binding, bridging|GO:0051087,chaperone binding|GO:0005198,structural molecule activity|GO:0005488,binding|GO:0005515,protein binding|GO:0005102,receptor binding|GO:0050839,cell adhesion molecule binding|GO:0060090,binding, bridging	hsa04611,Platelet activation|hsa04610,Complement and coagulation cascades	http://www.uniprot.org/uniprot/P02675
39	P04275	VWF	2.14672	GO:0022607,cellular component assembly|GO:0007599,hemostasis|GO:0070271,protein complex biogenesis|GO:0043933,macromolecular complex subunit organization|GO:0007597,blood coagulation, intrinsic pathway|GO:0007596,blood coagulation|GO:0032940,secretion by cell|GO:0071840,cellular component organization or biogenesis|GO:0044699,single-organism process|GO:0044710,single-organism metabolic process|GO…	GO:0005783,endoplasmic reticulum|GO:0044421,extracellular region part|GO:0031974,membrane-enclosed lumen|GO:0031012,extracellular matrix|GO:0043229,intracellular organelle|GO:0060205,cytoplasmic membrane-bounded vesicle lumen|GO:0030135,coated vesicle|GO:0043226,organelle|GO:0030136,clathrin-coated vesicle|GO:0005737,cytoplasm|GO:0031983,vesicle lumen|GO:0031982,vesicle|GO:0031093,platelet alpha …	GO:0001948,glycoprotein binding|GO:0005178,integrin binding|GO:0050839,cell adhesion molecule binding|GO:0005515,protein binding|GO:0047485,protein N-terminus binding|GO:0097367,carbohydrate derivative binding|GO:0051087,chaperone binding|GO:0019899,enzyme binding|GO:0019865,immunoglobulin binding|GO:0044877,macromolecular complex binding|GO:0005488,binding|GO:0002020,protease binding|GO:0032403,…	hsa04611,Platelet activation|hsa04512,ECM-receptor interaction|hsa04610,Complement and coagulation cascades|hsa04510,Focal adhesion|hsa04151,PI3K-Akt signaling pathway	http://www.uniprot.org/uniprot/P04275
40	P02749	APOH	2.96994	GO:0007599,hemostasis|GO:0019222,regulation of metabolic process|GO:0048585,negative regulation of response to stimulus|GO:0048584,positive regulation of response to stimulus|GO:0048583,regulation of response to stimulus|GO:0050680,negative regulation of epithelial cell proliferation|GO:0031638,zymogen activation|GO:0072359,circulatory system development|GO:0072358,cardiovascular system developme…	GO:0034358,plasma lipoprotein particle|GO:0031012,extracellular matrix|GO:1990777,lipoprotein particle|GO:0043227,membrane-bounded organelle|GO:0043226,organelle|GO:0042627,chylomicron|GO:0070062,extracellular exosome|GO:0031988,membrane-bounded vesicle|GO:0034361,very-low-density lipoprotein particle|GO:0034364,high-density lipoprotein particle|GO:0009986,cell surface|GO:0031982,vesicle|GO:00329…	GO:1901681,sulfur compound binding|GO:0043168,anion binding|GO:0005543,phospholipid binding|GO:0097367,carbohydrate derivative binding|GO:0030234,enzyme regulator activity|GO:0060230,lipoprotein lipase activator activity|GO:0008289,lipid binding|GO:0008201,heparin binding|GO:0005539,glycosaminoglycan binding|GO:0043167,ion binding|GO:0008047,enzyme activator activity|GO:0005515,protein binding|GO…	0	http://www.uniprot.org/uniprot/P02749
41	P02776	PF4	3.11965	GO:2001234,negative regulation of apoptotic signaling pathway|GO:2001236,regulation of extrinsic apoptotic signaling pathway|GO:2001237,negative regulation of extrinsic apoptotic signaling pathway|GO:0019220,regulation of phosphate metabolic process|GO:0019221,cytokine-mediated signaling pathway|GO:0019222,regulation of metabolic process|GO:2001233,regulation of apoptotic signaling pathway|GO:003…	GO:0031974,membrane-enclosed lumen|GO:0043229,intracellular organelle|GO:0060205,cytoplasmic membrane-bounded vesicle lumen|GO:0043227,membrane-bounded organelle|GO:0043226,organelle|GO:0005737,cytoplasm|GO:0031983,vesicle lumen|GO:0031982,vesicle|GO:0031093,platelet alpha granule lumen|GO:0016023,cytoplasmic membrane-bounded vesicle|GO:0031410,cytoplasmic vesicle|GO:0031988,membrane-bounded vesi…	GO:1901681,sulfur compound binding|GO:0043168,anion binding|GO:0042379,chemokine receptor binding|GO:0008009,chemokine activity|GO:0097367,carbohydrate derivative binding|GO:0005102,receptor binding|GO:0043167,ion binding|GO:0005539,glycosaminoglycan binding|GO:0005125,cytokine activity|GO:0048248,CXCR3 chemokine receptor binding|GO:0005488,binding|GO:0005515,protein binding|GO:0045236,CXCR chemo…	hsa04062,Chemokine signaling pathway|hsa04060,Cytokine-cytokine receptor interaction	http://www.uniprot.org/uniprot/P02776
42	Q13201	MMRN1	2.39479	GO:0007599,hemostasis|GO:0006950,response to stress|GO:0007596,blood coagulation|GO:0032940,secretion by cell|GO:0044699,single-organism process|GO:0002576,platelet degranulation|GO:0006887,exocytosis|GO:0009611,response to wounding|GO:0065007,biological regulation|GO:0030168,platelet activation|GO:0006810,transport|GO:0022610,biological adhesion|GO:0032501,multicellular organismal process|GO:005…	GO:0031974,membrane-enclosed lumen|GO:0043229,intracellular organelle|GO:0060205,cytoplasmic membrane-bounded vesicle lumen|GO:0043227,membrane-bounded organelle|GO:0043226,organelle|GO:0005737,cytoplasm|GO:0031983,vesicle lumen|GO:0031982,vesicle|GO:0031093,platelet alpha granule lumen|GO:0016023,cytoplasmic membrane-bounded vesicle|GO:0031410,cytoplasmic vesicle|GO:0031988,membrane-bounded vesi…	0	0	http://www.uniprot.org/uniprot/Q13201
43	P04003	C4BPA	1.42919	GO:0006909,phagocytosis|GO:0080090,regulation of primary metabolic process|GO:0019222,regulation of metabolic process|GO:0051049,regulation of transport|GO:0048585,negative regulation of response to stimulus|GO:0048584,positive regulation of response to stimulus|GO:0048583,regulation of response to stimulus|GO:0002707,negative regulation of lymphocyte mediated immunity|GO:0002706,regulation of ly…	GO:0044217,other organism part|GO:0044216,other organism cell|GO:0044215,other organism|GO:0016020,membrane|GO:0044464,cell part|GO:0005623,cell|GO:0071944,cell periphery|GO:0072562,blood microparticle|GO:0005886,plasma membrane|GO:0005576,extracellular region|GO:0044421,extracellular region part|GO:0005615,extracellular space	GO:0003676,nucleic acid binding|GO:0097159,organic cyclic compound binding|GO:0044822,poly(A) RNA binding|GO:0003723,RNA binding|GO:0005515,protein binding|GO:1901363,heterocyclic compound binding|GO:0005488,binding	hsa05133,Pertussis|hsa04610,Complement and coagulation cascades	http://www.uniprot.org/uniprot/P04003
44	P02647	APOA1	1.30921	GO:0007599,hemostasis|GO:0051046,regulation of secretion|GO:0051048,negative regulation of secretion|GO:0051049,regulation of transport|GO:0007596,blood coagulation|GO:0044281,small molecule metabolic process|GO:0002701,negative regulation of production of molecular mediator of immune response|GO:0002700,regulation of production of molecular mediator of immune response|GO:0051716,cellular respons…	GO:0005783,endoplasmic reticulum|GO:0044421,extracellular region part|GO:0005886,plasma membrane|GO:0005788,endoplasmic reticulum lumen|GO:0030139,endocytic vesicle|GO:0043229,intracellular organelle|GO:0071944,cell periphery|GO:1990777,lipoprotein particle|GO:0060205,cytoplasmic membrane-bounded vesicle lumen|GO:0005622,intracellular|GO:0043227,membrane-bounded organelle|GO:0043226,organelle|GO:…	GO:0017127,cholesterol transporter activity|GO:0070325,lipoprotein particle receptor binding|GO:0044877,macromolecular complex binding|GO:0008047,enzyme activator activity|GO:0004857,enzyme inhibitor activity|GO:0098772,molecular function regulator|GO:0060228,phosphatidylcholine-sterol O-acyltransferase activator activity|GO:0034191,apolipoprotein A-I receptor binding|GO:0034190,apolipoprotein re…	hsa05143,African trypanosomiasis|hsa03320,PPAR signaling pathway|hsa04975,Fat digestion and absorption|hsa04977,Vitamin digestion and absorption	http://www.uniprot.org/uniprot/P02647
