# Supplementary material
Source: publisher figshare collection journal article supplement (https://tandf.figshare.com/articles/dataset/_/6062987)
Supplement: Supplementary file 1 [file 2 › Exc.4 The detail information of all the differentially expressed proteins between each groups by Phosphorylation iTRAQ.xls]

## Sheet: B-A
ID	FoldChange	Log2FoldChange	Uniprot	Genename	Biological Process	Cell Component	Molecular Function	KEGG Pathways	UNIPROT_URL
P52333	0.45305	-1.14226	P52333	JAK3	GO:0051169,nuclear transport|GO:0035771,interleukin-4-mediated signaling pathway|GO:0051049,regulation of transport|GO:0002704,negative regulation of leukocyte mediated immunity|GO:0002703,regulation of leukocyte mediated immunity|GO:0002701,negative regulation of production of molecular mediator of immune response|GO:0002700,regulation of production of molecular mediator of immune response|GO:00…	GO:0019897,extrinsic component of plasma membrane|GO:0009898,cytoplasmic side of plasma membrane|GO:0019898,extrinsic component of membrane|GO:0043229,intracellular organelle|GO:0071944,cell periphery|GO:0098552,side of membrane|GO:0043226,organelle|GO:0005856,cytoskeleton|GO:0016020,membrane|GO:0044459,plasma membrane part|GO:0005737,cytoplasm|GO:0098562,cytoplasmic side of membrane|GO:0012505,e…	GO:0035639,purine ribonucleoside triphosphate binding|GO:0019899,enzyme binding|GO:0004672,protein kinase activity|GO:0043167,ion binding|GO:1901363,heterocyclic compound binding|GO:0001883,purine nucleoside binding|GO:0001882,nucleoside binding|GO:0043168,anion binding|GO:0000166,nucleotide binding|GO:0016740,transferase activity|GO:0004715,non-membrane spanning protein tyrosine kinase activity|…	hsa04550,Signaling pathways regulating pluripotency of stem cells|hsa05203,Viral carcinogenesis|hsa04630,Jak-STAT signaling pathway|hsa05169,Epstein-Barr virus infection|hsa05340,Primary immunodeficiency|hsa05166,HTLV-I infection|hsa04062,Chemokine signaling pathway|hsa05162,Measles|hsa04151,PI3K-Akt signaling pathway	http://www.uniprot.org/uniprot/P52333
Q96EV8	0.538725	-0.892379	Q96EV8	DTNBP1	GO:0019220,regulation of phosphate metabolic process|GO:0080090,regulation of primary metabolic process|GO:0019222,regulation of metabolic process|GO:0051047,positive regulation of secretion|GO:0051049,regulation of transport|GO:0032438,melanosome organization|GO:0007596,blood coagulation|GO:0048583,regulation of response to stimulus|GO:0015872,dopamine transport|GO:0061024,membrane organization|…	GO:0008021,synaptic vesicle|GO:0005783,endoplasmic reticulum|GO:0098590,plasma membrane region|GO:0044464,cell part|GO:0048770,pigment granule|GO:0030426,growth cone|GO:0030425,dendrite|GO:0005789,endoplasmic reticulum membrane|GO:0042175,nuclear outer membrane-endoplasmic reticulum membrane network|GO:0043229,intracellular organelle|GO:0071944,cell periphery|GO:0045202,synapse|GO:0032991,macromo…	GO:0005488,binding|GO:0005515,protein binding		http://www.uniprot.org/uniprot/Q96EV8
O14745	0.63125	-0.663717	O14745	SLC9A3R1	GO:0033157,regulation of intracellular protein transport|GO:0051169,nuclear transport|GO:0051046,regulation of secretion|GO:0051049,regulation of transport|GO:0098771,inorganic ion homeostasis|GO:0051656,establishment of organelle localization|GO:0051716,cellular response to stimulus|GO:0000165,MAPK cascade|GO:0090162,establishment of epithelial cell polarity|GO:0030855,epithelial cell differenti…	GO:0098590,plasma membrane region|GO:0016020,membrane|GO:0015629,actin cytoskeleton|GO:0044421,extracellular region part|GO:0045177,apical part of cell|GO:0097223,sperm part|GO:0030175,filopodium|GO:0043229,intracellular organelle|GO:0043228,non-membrane-bounded organelle|GO:0005929,cilium|GO:0005815,microtubule organizing center|GO:0043227,membrane-bounded organelle|GO:0043226,organelle|GO:00058…	GO:0031690,adrenergic receptor binding|GO:0019899,enzyme binding|GO:0031698,beta-2 adrenergic receptor binding|GO:0005488,binding|GO:0001664,G-protein coupled receptor binding|GO:0098772,molecular function regulator|GO:0005198,structural molecule activity|GO:0017081,chloride channel regulator activity|GO:0032403,protein complex binding|GO:0008013,beta-catenin binding|GO:0016247,channel regulator …		http://www.uniprot.org/uniprot/O14745
Q9H7J1	0.63405	-0.657331	Q9H7J1	PPP1R3E	GO:0009894,regulation of catabolic process|GO:0080090,regulation of primary metabolic process|GO:0031329,regulation of cellular catabolic process|GO:0016311,dephosphorylation|GO:0031326,regulation of cellular biosynthetic process|GO:0031323,regulation of cellular metabolic process|GO:0044699,single-organism process|GO:0010906,regulation of glucose metabolic process|GO:0044249,cellular biosyntheti…	GO:0005737,cytoplasm|GO:0044464,cell part|GO:0005623,cell|GO:0005622,intracellular|GO:0044444,cytoplasmic part|GO:0042587,glycogen granule|GO:0044424,intracellular part	GO:0016787,hydrolase activity|GO:0016791,phosphatase activity|GO:0016788,hydrolase activity, acting on ester bonds|GO:0042578,phosphoric ester hydrolase activity|GO:0003824,catalytic activity|GO:0004721,phosphoprotein phosphatase activity	hsa04910,Insulin signaling pathway	http://www.uniprot.org/uniprot/Q9H7J1
Q99501	0.645125	-0.632349	Q99501	GAS2L1	GO:0031110,regulation of microtubule polymerization or depolymerization|GO:0031111,negative regulation of microtubule polymerization or depolymerization|GO:0031114,regulation of microtubule depolymerization|GO:0019222,regulation of metabolic process|GO:0032870,cellular response to hormone stimulus|GO:0032845,negative regulation of homeostatic process|GO:0032844,regulation of homeostatic process|G…	GO:0032432,actin filament bundle|GO:0015629,actin cytoskeleton|GO:0043229,intracellular organelle|GO:0043228,non-membrane-bounded organelle|GO:0005874,microtubule|GO:0043226,organelle|GO:0042641,actomyosin|GO:0005856,cytoskeleton|GO:0001725,stress fiber|GO:0044430,cytoskeletal part|GO:0005737,cytoplasm|GO:0015630,microtubule cytoskeleton|GO:0043234,protein complex|GO:0032991,macromolecular comple…	GO:0030674,protein binding, bridging|GO:0008093,cytoskeletal adaptor activity|GO:0008092,cytoskeletal protein binding|GO:0008017,microtubule binding|GO:0035257,nuclear hormone receptor binding|GO:0015631,tubulin binding|GO:0046966,thyroid hormone receptor binding|GO:0044877,macromolecular complex binding|GO:0005488,binding|GO:0005515,protein binding|GO:0032403,protein complex binding|GO:0051427,h…		http://www.uniprot.org/uniprot/Q99501
Q9HCN4	0.650075	-0.621322	Q9HCN4	GPN1	GO:0008152,metabolic process	GO:0005737,cytoplasm|GO:0043231,intracellular membrane-bounded organelle|GO:0005634,nucleus|GO:0044464,cell part|GO:0005623,cell|GO:0005622,intracellular|GO:0043229,intracellular organelle|GO:0044424,intracellular part|GO:0043227,membrane-bounded organelle|GO:0043226,organelle	GO:0035639,purine ribonucleoside triphosphate binding|GO:0005488,binding|GO:0043167,ion binding|GO:1901363,heterocyclic compound binding|GO:1901265,nucleoside phosphate binding|GO:0001882,nucleoside binding|GO:0043168,anion binding|GO:0016462,pyrophosphatase activity|GO:0000166,nucleotide binding|GO:0032561,guanyl ribonucleotide binding|GO:0001883,purine nucleoside binding|GO:0032549,ribonucleosi…		http://www.uniprot.org/uniprot/Q9HCN4
Q9UDX5	0.6619	-0.595315	Q9UDX5	MTFP1	GO:0016265,death|GO:0006996,organelle organization|GO:0009987,cellular process|GO:0000266,mitochondrial fission|GO:0071840,cellular component organization or biogenesis|GO:0006915,apoptotic process|GO:0016043,cellular component organization|GO:0012501,programmed cell death|GO:0044763,single-organism cellular process|GO:0007005,mitochondrion organization|GO:0008219,cell death|GO:0044699,single-org…	GO:0044464,cell part|GO:0031975,envelope|GO:0043229,intracellular organelle|GO:0043227,membrane-bounded organelle|GO:0043226,organelle|GO:0031224,intrinsic component of membrane|GO:0005737,cytoplasm|GO:0031090,organelle membrane|GO:0016021,integral component of membrane|GO:0016020,membrane|GO:0044444,cytoplasmic part|GO:0005739,mitochondrion|GO:0031967,organelle envelope|GO:0031966,mitochondrial …			http://www.uniprot.org/uniprot/Q9UDX5
Q15084	1.50735	0.592014	Q15084	PDIA6	GO:0006457,protein folding|GO:0042592,homeostatic process|GO:0023052,signaling|GO:0007165,signal transduction|GO:0070887,cellular response to chemical stimulus|GO:0042221,response to chemical|GO:0050789,regulation of biological process|GO:0044699,single-organism process|GO:0044267,cellular protein metabolic process|GO:0051716,cellular response to stimulus|GO:0006986,response to unfolded protein|G…	GO:0005783,endoplasmic reticulum|GO:0048770,pigment granule|GO:0031974,membrane-enclosed lumen|GO:0005789,endoplasmic reticulum membrane|GO:0042175,nuclear outer membrane-endoplasmic reticulum membrane network|GO:0043229,intracellular organelle|GO:0071944,cell periphery|GO:0034663,endoplasmic reticulum chaperone complex|GO:0043227,membrane-bounded organelle|GO:0043226,organelle|GO:0005737,cytopla…	GO:0005488,binding|GO:0016853,isomerase activity|GO:0003824,catalytic activity|GO:0003756,protein disulfide isomerase activity|GO:0005515,protein binding|GO:0016864,intramolecular oxidoreductase activity, transposing S-S bonds|GO:0016860,intramolecular oxidoreductase activity	hsa04141,Protein processing in endoplasmic reticulum	http://www.uniprot.org/uniprot/Q15084
O75821	1.51307	0.597484	O75821	EIF3G	GO:0022607,cellular component assembly|GO:0080090,regulation of primary metabolic process|GO:0019222,regulation of metabolic process|GO:0043933,macromolecular complex subunit organization|GO:2000112,regulation of cellular macromolecule biosynthetic process|GO:0031323,regulation of cellular metabolic process|GO:0044249,cellular biosynthetic process|GO:0034641,cellular nitrogen compound metabolic p…	GO:0043234,protein complex|GO:0005737,cytoplasm|GO:0005829,cytosol|GO:0005852,eukaryotic translation initiation factor 3 complex|GO:0043231,intracellular membrane-bounded organelle|GO:0044464,cell part|GO:0016282,eukaryotic 43S preinitiation complex|GO:0005634,nucleus|GO:0070993,translation preinitiation complex|GO:0044444,cytoplasmic part|GO:0005623,cell|GO:0030529,ribonucleoprotein complex|GO:0…	GO:0005488,binding|GO:0005515,protein binding|GO:0097159,organic cyclic compound binding|GO:0044822,poly(A) RNA binding|GO:0008135,translation factor activity, RNA binding|GO:0000166,nucleotide binding|GO:0036094,small molecule binding|GO:0003723,RNA binding|GO:0003676,nucleic acid binding|GO:1901363,heterocyclic compound binding|GO:1901265,nucleoside phosphate binding|GO:0003743,translation init…	hsa03013,RNA transport	http://www.uniprot.org/uniprot/O75821
Q6VY07	1.55105	0.633245	Q6VY07	PACS1	GO:0008104,protein localization|GO:0050688,regulation of defense response to virus|GO:0032101,regulation of response to external stimulus|GO:0034067,protein localization to Golgi apparatus|GO:0050896,response to stimulus|GO:0072661,protein targeting to plasma membrane|GO:0006612,protein targeting to membrane|GO:0048583,regulation of response to stimulus|GO:0072600,establishment of protein localiz…	GO:0030135,coated vesicle|GO:0043229,intracellular organelle|GO:0043227,membrane-bounded organelle|GO:0043226,organelle|GO:0030137,COPI-coated vesicle|GO:0005737,cytoplasm|GO:0031982,vesicle|GO:0016023,cytoplasmic membrane-bounded vesicle|GO:0031410,cytoplasmic vesicle|GO:0031988,membrane-bounded vesicle|GO:0044431,Golgi apparatus part|GO:0048471,perinuclear region of cytoplasm|GO:0005794,Golgi a…	GO:0044325,ion channel binding|GO:0005488,binding|GO:0005515,protein binding		http://www.uniprot.org/uniprot/Q6VY07
Q9Y624	1.55545	0.637332	Q9Y624	F11R	GO:2000249,regulation of actin cytoskeleton reorganization|GO:0007599,hemostasis|GO:0019222,regulation of metabolic process|GO:0007596,blood coagulation|GO:0048468,cell development|GO:0061024,membrane organization|GO:0007009,plasma membrane organization|GO:0003013,circulatory system process|GO:0007165,signal transduction|GO:0007166,cell surface receptor signaling pathway|GO:0007167,enzyme linked …	GO:0043226,organelle|GO:0043229,intracellular organelle|GO:0043228,non-membrane-bounded organelle|GO:0043227,membrane-bounded organelle|GO:0005923,bicellular tight junction|GO:0030054,cell junction|GO:0005856,cytoskeleton|GO:0070062,extracellular exosome|GO:0031410,cytoplasmic vesicle|GO:0016021,integral component of membrane|GO:0016020,membrane|GO:0031988,membrane-bounded vesicle|GO:0005576,extr…	GO:0030165,PDZ domain binding|GO:0019904,protein domain specific binding|GO:0005515,protein binding|GO:0005488,binding	hsa04530,Tight junction|hsa05120,Epithelial cell signaling in Helicobacter pylori infection|hsa04514,Cell adhesion molecules (CAMs)|hsa04670,Leukocyte transendothelial migration	http://www.uniprot.org/uniprot/Q9Y624
Q6XQN6	1.56563	0.646739	Q6XQN6	NAPRT	GO:0019674,NAD metabolic process|GO:0006732,coenzyme metabolic process|GO:0006733,oxidoreduction coenzyme metabolic process|GO:0046496,nicotinamide nucleotide metabolic process|GO:0009435,NAD biosynthetic process|GO:0034641,cellular nitrogen compound metabolic process|GO:0009165,nucleotide biosynthetic process|GO:0046497,nicotinate nucleotide metabolic process|GO:0044281,small molecule metabolic …	GO:0031974,membrane-enclosed lumen|GO:0043229,intracellular organelle|GO:0043227,membrane-bounded organelle|GO:0043226,organelle|GO:0005737,cytoplasm|GO:0070062,extracellular exosome|GO:0031981,nuclear lumen|GO:0005634,nucleus|GO:0031988,membrane-bounded vesicle|GO:0005654,nucleoplasm|GO:0005794,Golgi apparatus|GO:0012505,endomembrane system|GO:1903561,extracellular vesicle|GO:0031982,vesicle|GO:…	GO:0004514,nicotinate-nucleotide diphosphorylase (carboxylating) activity|GO:0005515,protein binding|GO:0004516,nicotinate phosphoribosyltransferase activity|GO:0003824,catalytic activity|GO:0016740,transferase activity|GO:0005488,binding|GO:0016757,transferase activity, transferring glycosyl groups|GO:0016763,transferase activity, transferring pentosyl groups|GO:0016874,ligase activity	hsa00760,Nicotinate and nicotinamide metabolism|hsa01100,Metabolic pathways	http://www.uniprot.org/uniprot/Q6XQN6
Q6ZSS7	1.56955	0.650351	Q6ZSS7	MFSD6	GO:0006810,transport|GO:0009987,cellular process|GO:0051179,localization|GO:0044765,single-organism transport|GO:0044763,single-organism cellular process|GO:1902578,single-organism localization|GO:0051234,establishment of localization|GO:0055085,transmembrane transport|GO:0044699,single-organism process	GO:0044425,membrane part|GO:0016021,integral component of membrane|GO:0016020,membrane|GO:0031224,intrinsic component of membrane			http://www.uniprot.org/uniprot/Q6ZSS7
Q8TCJ2	1.58407	0.663641	Q8TCJ2	STT3B	GO:0006950,response to stress|GO:0036503,ERAD pathway|GO:0044248,cellular catabolic process|GO:0044257,cellular protein catabolic process|GO:0034645,cellular macromolecule biosynthetic process|GO:1901576,organic substance biosynthetic process|GO:0043632,modification-dependent macromolecule catabolic process|GO:0009100,glycoprotein metabolic process|GO:0009101,glycoprotein biosynthetic process|GO:…	GO:0005783,endoplasmic reticulum|GO:0005789,endoplasmic reticulum membrane|GO:0042175,nuclear outer membrane-endoplasmic reticulum membrane network|GO:0043229,intracellular organelle|GO:0043227,membrane-bounded organelle|GO:0043226,organelle|GO:0031224,intrinsic component of membrane|GO:0005737,cytoplasm|GO:0031090,organelle membrane|GO:0016021,integral component of membrane|GO:0016020,membrane|G…	GO:0003824,catalytic activity|GO:0016740,transferase activity|GO:0004576,oligosaccharyl transferase activity|GO:0016757,transferase activity, transferring glycosyl groups|GO:0016758,transferase activity, transferring hexosyl groups|GO:0004579,dolichyl-diphosphooligosaccharide-protein glycotransferase activity	hsa04141,Protein processing in endoplasmic reticulum|hsa00510,N-Glycan biosynthesis|hsa01100,Metabolic pathways	http://www.uniprot.org/uniprot/Q8TCJ2
P07900	1.59175	0.670614	P07900	HSP90AA1	GO:0008104,protein localization|GO:0006909,phagocytosis|GO:0019222,regulation of metabolic process|GO:0000086,G2/M transition of mitotic cell cycle|GO:0034605,cellular response to heat|GO:0048584,positive regulation of response to stimulus|GO:0048583,regulation of response to stimulus|GO:0009408,response to heat|GO:0061024,membrane organization|GO:0007008,outer mitochondrial membrane organization…	GO:0098590,plasma membrane region|GO:0044421,extracellular region part|GO:0048770,pigment granule|GO:0031974,membrane-enclosed lumen|GO:0030139,endocytic vesicle|GO:0043229,intracellular organelle|GO:0071944,cell periphery|GO:0060205,cytoplasmic membrane-bounded vesicle lumen|GO:0005622,intracellular|GO:0043227,membrane-bounded organelle|GO:0043226,organelle|GO:0005737,cytoplasm|GO:0044433,cytopl…	GO:0016887,ATPase activity|GO:0035639,purine ribonucleoside triphosphate binding|GO:0019899,enzyme binding|GO:0051020,GTPase binding|GO:0044877,macromolecular complex binding|GO:0005488,binding|GO:0003676,nucleic acid binding|GO:0098772,molecular function regulator|GO:1901363,heterocyclic compound binding|GO:0001883,purine nucleoside binding|GO:0001882,nucleoside binding|GO:0043168,anion binding|…	hsa04612,Antigen processing and presentation|hsa04621,NOD-like receptor signaling pathway|hsa05200,Pathways in cancer|hsa04141,Protein processing in endoplasmic reticulum|hsa04914,Progesterone-mediated oocyte maturation|hsa04915,Estrogen signaling pathway|hsa05215,Prostate cancer|hsa04151,PI3K-Akt signaling pathway	http://www.uniprot.org/uniprot/P07900
Q15555	1.60823	0.685469	Q15555	MAPRE2	GO:1903047,mitotic cell cycle process|GO:0023052,signaling|GO:0007165,signal transduction|GO:0051301,cell division|GO:0007067,mitotic nuclear division|GO:0050789,regulation of biological process|GO:0044699,single-organism process|GO:0051716,cellular response to stimulus|GO:0000280,nuclear division|GO:0016043,cellular component organization|GO:0065007,biological regulation|GO:0071840,cellular comp…	GO:0005856,cytoskeleton|GO:0043234,protein complex|GO:0015630,microtubule cytoskeleton|GO:0043228,non-membrane-bounded organelle|GO:0005622,intracellular|GO:0043232,intracellular non-membrane-bounded organelle|GO:0035371,microtubule plus-end|GO:0044464,cell part|GO:0005623,cell|GO:0005737,cytoplasm|GO:0044446,intracellular organelle part|GO:0043229,intracellular organelle|GO:0044430,cytoskeletal …	GO:0015631,tubulin binding|GO:0008092,cytoskeletal protein binding|GO:0008017,microtubule binding|GO:0044877,macromolecular complex binding|GO:0005488,binding|GO:0005515,protein binding|GO:0032403,protein complex binding		http://www.uniprot.org/uniprot/Q15555
Q9Y6D6	1.61823	0.694412	Q9Y6D6	ARFGEF1	GO:0008104,protein localization|GO:0080090,regulation of primary metabolic process|GO:0019222,regulation of metabolic process|GO:0048584,positive regulation of response to stimulus|GO:0048583,regulation of response to stimulus|GO:0008064,regulation of actin polymerization or depolymerization|GO:0007163,establishment or maintenance of cell polarity|GO:0007165,signal transduction|GO:0090066,regulat…	GO:0016020,membrane|GO:0031974,membrane-enclosed lumen|GO:0043229,intracellular organelle|GO:0043228,non-membrane-bounded organelle|GO:0005622,intracellular|GO:0043227,membrane-bounded organelle|GO:0043226,organelle|GO:0034399,nuclear periphery|GO:0031984,organelle subcompartment|GO:0031090,organelle membrane|GO:0031981,nuclear lumen|GO:0005730,nucleolus|GO:0005634,nucleus|GO:0043233,organelle lu…	GO:0005488,binding|GO:0051018,protein kinase A binding|GO:0008092,cytoskeletal protein binding|GO:0005085,guanyl-nucleotide exchange factor activity|GO:0030234,enzyme regulator activity|GO:0005096,GTPase activator activity|GO:0017022,myosin binding|GO:0005086,ARF guanyl-nucleotide exchange factor activity|GO:0030695,GTPase regulator activity|GO:0008047,enzyme activator activity|GO:0005515,protein…	hsa04144,Endocytosis	http://www.uniprot.org/uniprot/Q9Y6D6
Q00013	1.6248	0.700262	Q00013	MPP1	GO:0051716,cellular response to stimulus|GO:0008152,metabolic process|GO:0032101,regulation of response to external stimulus|GO:0016310,phosphorylation|GO:1990266,neutrophil migration|GO:0048583,regulation of response to stimulus|GO:0007610,behavior|GO:0006928,movement of cell or subcellular component|GO:0050900,leukocyte migration|GO:0006807,nitrogen compound metabolic process|GO:1902622,regulat…	GO:0005902,microvillus|GO:0043228,non-membrane-bounded organelle|GO:0005622,intracellular|GO:0031226,intrinsic component of plasma membrane|GO:0043226,organelle|GO:0031224,intrinsic component of membrane|GO:0005856,cytoskeleton|GO:0016021,integral component of membrane|GO:0016020,membrane|GO:0044459,plasma membrane part|GO:0032421,stereocilium bundle|GO:0032420,stereocilium|GO:0005938,cell cortex…	GO:0019201,nucleotide kinase activity|GO:0019205,nucleobase-containing compound kinase activity|GO:0016772,transferase activity, transferring phosphorus-containing groups|GO:0016301,kinase activity|GO:0004385,guanylate kinase activity|GO:0016776,phosphotransferase activity, phosphate group as acceptor|GO:0003824,catalytic activity|GO:0016740,transferase activity|GO:0005488,binding|GO:0005515,prot…		http://www.uniprot.org/uniprot/Q00013
Q9P289	1.68837	0.755635	Q9P289	STK26	GO:0019220,regulation of phosphate metabolic process|GO:0080090,regulation of primary metabolic process|GO:0019222,regulation of metabolic process|GO:0048583,regulation of response to stimulus|GO:0032147,activation of protein kinase activity|GO:0007165,signal transduction|GO:0071840,cellular component organization or biogenesis|GO:0044710,single-organism metabolic process|GO:0010604,positive regu…	GO:0098590,plasma membrane region|GO:0044421,extracellular region part|GO:0031974,membrane-enclosed lumen|GO:0043229,intracellular organelle|GO:0043228,non-membrane-bounded organelle|GO:0005815,microtubule organizing center|GO:0043227,membrane-bounded organelle|GO:0043226,organelle|GO:0005856,cytoskeleton|GO:0045177,apical part of cell|GO:0070062,extracellular exosome|GO:0031981,nuclear lumen|GO:…	GO:0035639,purine ribonucleoside triphosphate binding|GO:0004672,protein kinase activity|GO:0043167,ion binding|GO:1901363,heterocyclic compound binding|GO:0001883,purine nucleoside binding|GO:0001882,nucleoside binding|GO:0043168,anion binding|GO:0043169,cation binding|GO:0000287,magnesium ion binding|GO:0000166,nucleotide binding|GO:0004674,protein serine/threonine kinase activity|GO:0016740,tr…		http://www.uniprot.org/uniprot/Q9P289
Q12846	1.69245	0.759113	Q12846	STX4	GO:0035774,positive regulation of insulin secretion involved in cellular response to glucose stimulus|GO:0032024,positive regulation of insulin secretion|GO:2001236,regulation of extrinsic apoptotic signaling pathway|GO:0006887,exocytosis|GO:0007599,hemostasis|GO:0019222,regulation of metabolic process|GO:2001233,regulation of apoptotic signaling pathway|GO:0051049,regulation of transport|GO:0008…	GO:0008021,synaptic vesicle|GO:0042995,cell projection|GO:0043219,lateral loop|GO:0098590,plasma membrane region|GO:0044421,extracellular region part|GO:0030425,dendrite|GO:0043229,intracellular organelle|GO:0071944,cell periphery|GO:0045202,synapse|GO:0031201,SNARE complex|GO:0043227,membrane-bounded organelle|GO:0043226,organelle|GO:0031224,intrinsic component of membrane|GO:0005737,cytoplasm|G…	GO:0005488,binding|GO:0016230,sphingomyelin phosphodiesterase activator activity|GO:0060229,lipase activator activity|GO:0008047,enzyme activator activity|GO:0005515,protein binding|GO:0000149,SNARE binding|GO:0005484,SNAP receptor activity|GO:0098772,molecular function regulator|GO:0030234,enzyme regulator activity|GO:0016004,phospholipase activator activity	hsa04962,Vasopressin-regulated water reabsorption|hsa04130,SNARE interactions in vesicular transport	http://www.uniprot.org/uniprot/Q12846
Q00577	1.7254	0.786931	Q00577	PURA	GO:0080090,regulation of primary metabolic process|GO:0019222,regulation of metabolic process|GO:1901362,organic cyclic compound biosynthetic process|GO:0071840,cellular component organization or biogenesis|GO:0010605,negative regulation of macromolecule metabolic process|GO:0010608,posttranscriptional regulation of gene expression|GO:0043043,peptide biosynthetic process|GO:0006260,DNA replicatio…	GO:0031974,membrane-enclosed lumen|GO:0000781,chromosome, telomeric region|GO:0043229,intracellular organelle|GO:0005662,DNA replication factor A complex|GO:0000784,nuclear chromosome, telomeric region|GO:0000228,nuclear chromosome|GO:0043227,membrane-bounded organelle|GO:0043226,organelle|GO:0005737,cytoplasm|GO:0031981,nuclear lumen|GO:0097458,neuron part|GO:0005634,nucleus|GO:0044454,nuclear c…	GO:0005488,binding|GO:0003676,nucleic acid binding|GO:0003677,DNA binding|GO:1901363,heterocyclic compound binding|GO:0043565,sequence-specific DNA binding|GO:0043566,structure-specific DNA binding|GO:0000900,translation repressor activity, nucleic acid binding|GO:0008134,transcription factor binding|GO:0003690,double-stranded DNA binding|GO:0003691,double-stranded telomeric DNA binding|GO:000369…		http://www.uniprot.org/uniprot/Q00577
P13861	1.7521	0.809085	P13861	PRKAR2A	GO:0090087,regulation of peptide transport|GO:0043549,regulation of kinase activity|GO:0019220,regulation of phosphate metabolic process|GO:0080090,regulation of primary metabolic process|GO:0019222,regulation of metabolic process|GO:0051049,regulation of transport|GO:0007596,blood coagulation|GO:0032147,activation of protein kinase activity|GO:0008104,protein localization|GO:0003014,renal system…	GO:0098590,plasma membrane region|GO:0044463,cell projection part|GO:0043229,intracellular organelle|GO:0043228,non-membrane-bounded organelle|GO:0005929,cilium|GO:0005924,cell-substrate adherens junction|GO:0005925,focal adhesion|GO:0043227,membrane-bounded organelle|GO:0043226,organelle|GO:0030054,cell junction|GO:0030055,cell-substrate junction|GO:0005856,cytoskeleton|GO:0098589,membrane regio…	GO:0044389,ubiquitin-like protein ligase binding|GO:0019207,kinase regulator activity|GO:0019901,protein kinase binding|GO:0019899,enzyme binding|GO:0036094,small molecule binding|GO:0005488,binding|GO:0004857,enzyme inhibitor activity|GO:0098772,molecular function regulator|GO:1901363,heterocyclic compound binding|GO:1901265,nucleoside phosphate binding|GO:0043168,anion binding|GO:0008603,cAMP-d…	hsa04210,Apoptosis|hsa04910,Insulin signaling pathway	http://www.uniprot.org/uniprot/P13861
O75396	1.76598	0.820465	O75396	SEC22B	GO:0009896,positive regulation of catabolic process|GO:0009894,regulation of catabolic process|GO:0008104,protein localization|GO:0080090,regulation of primary metabolic process|GO:0019222,regulation of metabolic process|GO:0033043,regulation of organelle organization|GO:0051128,regulation of cellular component organization|GO:0042176,regulation of protein catabolic process|GO:0051641,cellular lo…	GO:0005783,endoplasmic reticulum|GO:0033116,endoplasmic reticulum-Golgi intermediate compartment membrane|GO:0005789,endoplasmic reticulum membrane|GO:0042175,nuclear outer membrane-endoplasmic reticulum membrane network|GO:0043229,intracellular organelle|GO:0005622,intracellular|GO:0043227,membrane-bounded organelle|GO:0043226,organelle|GO:0031224,intrinsic component of membrane|GO:0005737,cytop…	GO:0000149,SNARE binding|GO:0019905,syntaxin binding|GO:0005488,binding|GO:0005515,protein binding	hsa04145,Phagosome|hsa04130,SNARE interactions in vesicular transport|hsa05134,Legionellosis	http://www.uniprot.org/uniprot/O75396
Q6ZU35	1.80363	0.850899	Q6ZU35	KIAA1211
Q16512	1.81367	0.858916	Q16512	PKN1	GO:0006366,transcription from RNA polymerase II promoter|GO:0043549,regulation of kinase activity|GO:0019220,regulation of phosphate metabolic process|GO:0080090,regulation of primary metabolic process|GO:0019222,regulation of metabolic process|GO:0001667,ameboidal-type cell migration|GO:0048584,positive regulation of response to stimulus|GO:0048583,regulation of response to stimulus|GO:0032147,a…	GO:0044464,cell part|GO:0031974,membrane-enclosed lumen|GO:0043229,intracellular organelle|GO:0071944,cell periphery|GO:0097610,cell surface furrow|GO:0043227,membrane-bounded organelle|GO:0043226,organelle|GO:0005737,cytoplasm|GO:0031982,vesicle|GO:0031981,nuclear lumen|GO:0016023,cytoplasmic membrane-bounded vesicle|GO:0031410,cytoplasmic vesicle|GO:0005634,nucleus|GO:0016020,membrane|GO:003198…	GO:0000988,transcription factor activity, protein binding|GO:0042393,histone binding|GO:0035639,purine ribonucleoside triphosphate binding|GO:0005080,protein kinase C binding|GO:0050681,androgen receptor binding|GO:0017048,Rho GTPase binding|GO:0017049,GTP-Rho binding|GO:0031267,small GTPase binding|GO:0051020,GTPase binding|GO:0044877,macromolecular complex binding|GO:0004672,protein kinase acti…	hsa05132,Salmonella infection|hsa04151,PI3K-Akt signaling pathway	http://www.uniprot.org/uniprot/Q16512
P53621	1.8952	0.92235	P53621	COPA	GO:0033036,macromolecule localization|GO:0008104,protein localization|GO:0022600,digestive system process|GO:0048200,Golgi transport vesicle coating|GO:0006901,vesicle coating|GO:0048205,COPI coating of Golgi vesicle|GO:0006903,vesicle targeting|GO:0061024,membrane organization|GO:0032941,secretion by tissue|GO:0051641,cellular localization|GO:0051640,organelle localization|GO:0051656,establishme…	GO:0031090,organelle membrane|GO:0043229,intracellular organelle|GO:0030117,membrane coat|GO:0005622,intracellular|GO:0030135,coated vesicle|GO:0043226,organelle|GO:0030137,COPI-coated vesicle|GO:0005737,cytoplasm|GO:0070062,extracellular exosome|GO:0030663,COPI-coated vesicle membrane|GO:0030662,coated vesicle membrane|GO:0016023,cytoplasmic membrane-bounded vesicle|GO:0031410,cytoplasmic vesicl…	GO:0005179,hormone activity|GO:0005198,structural molecule activity|GO:0005488,binding|GO:0005515,protein binding|GO:0005102,receptor binding		http://www.uniprot.org/uniprot/P53621
P24844	1.90607	0.930605	P24844	MYL9	GO:0050817,coagulation|GO:0006936,muscle contraction|GO:0044707,single-multicellular organism process|GO:0016337,single organismal cell-cell adhesion|GO:0007409,axonogenesis|GO:0030030,cell projection organization|GO:0031175,neuron projection development|GO:0048468,cell development|GO:0006928,movement of cell or subcellular component|GO:0007596,blood coagulation|GO:0003012,muscle system process|G…	GO:0032432,actin filament bundle|GO:0015629,actin cytoskeleton|GO:0030016,myofibril|GO:0030017,sarcomere|GO:0043229,intracellular organelle|GO:0043228,non-membrane-bounded organelle|GO:0044430,cytoskeletal part|GO:0043226,organelle|GO:0030018,Z disc|GO:0042641,actomyosin|GO:0005856,cytoskeleton|GO:0001725,stress fiber|GO:0031674,I band|GO:0005859,muscle myosin complex|GO:0016459,myosin complex|GO…	GO:0032036,myosin heavy chain binding|GO:0043169,cation binding|GO:0005198,structural molecule activity|GO:0008092,cytoskeletal protein binding|GO:0017022,myosin binding|GO:0043167,ion binding|GO:0008307,structural constituent of muscle|GO:0005509,calcium ion binding|GO:0005515,protein binding|GO:0046872,metal ion binding|GO:0005488,binding	hsa04022,cGMP-PKG signaling pathway|hsa04024,cAMP signaling pathway|hsa04530,Tight junction|hsa04670,Leukocyte transendothelial migration|hsa04510,Focal adhesion|hsa04810,Regulation of actin cytoskeleton|hsa04921,Oxytocin signaling pathway|hsa04270,Vascular smooth muscle contraction	http://www.uniprot.org/uniprot/P24844
Q13442	2.07253	1.05139	Q13442	PDAP1	GO:0044700,single organism signaling|GO:0051716,cellular response to stimulus|GO:0008283,cell proliferation|GO:0050896,response to stimulus|GO:0009987,cellular process|GO:0044763,single-organism cellular process|GO:0050794,regulation of cellular process|GO:0065007,biological regulation|GO:0023052,signaling|GO:0007165,signal transduction|GO:0007154,cell communication|GO:0050789,regulation of biolo…		GO:0097159,organic cyclic compound binding|GO:0044822,poly(A) RNA binding|GO:0005488,binding|GO:0003676,nucleic acid binding|GO:1901363,heterocyclic compound binding|GO:0003723,RNA binding		http://www.uniprot.org/uniprot/Q13442
P08567	2.3215	1.21506	P08567	PLEK	GO:0043933,macromolecular complex subunit organization|GO:0019220,regulation of phosphate metabolic process|GO:0080090,regulation of primary metabolic process|GO:0019222,regulation of metabolic process|GO:0006904,vesicle docking involved in exocytosis|GO:0048585,negative regulation of response to stimulus|GO:0048584,positive regulation of response to stimulus|GO:0048583,regulation of response to …	GO:0098590,plasma membrane region|GO:0071944,cell periphery|GO:0005737,cytoplasm|GO:0001726,ruffle|GO:0098805,whole membrane|GO:0016020,membrane|GO:0044459,plasma membrane part|GO:0031256,leading edge membrane|GO:0098589,membrane region|GO:0031253,cell projection membrane|GO:0031252,cell leading edge|GO:0005886,plasma membrane|GO:0042995,cell projection|GO:0032587,ruffle membrane|GO:0005829,cytos…	GO:0043168,anion binding|GO:0019901,protein kinase binding|GO:0035091,phosphatidylinositol binding|GO:0005080,protein kinase C binding|GO:0005543,phospholipid binding|GO:0008289,lipid binding|GO:0019899,enzyme binding|GO:0043167,ion binding|GO:1902936,phosphatidylinositol bisphosphate binding|GO:0019900,kinase binding|GO:0043325,phosphatidylinositol-3,4-bisphosphate binding|GO:0005488,binding|GO:…		http://www.uniprot.org/uniprot/P08567
Q6ZTN6	2.78322	1.47676	Q6ZTN6	ANKRD13D		GO:0005737,cytoplasm|GO:0016020,membrane|GO:0043231,intracellular membrane-bounded organelle|GO:0005768,endosome|GO:0005770,late endosome|GO:0044464,cell part|GO:0044444,cytoplasmic part|GO:0005623,cell|GO:0005622,intracellular|GO:0043229,intracellular organelle|GO:0071944,cell periphery|GO:0012505,endomembrane system|GO:0005886,plasma membrane|GO:0044424,intracellular part|GO:0043227,membrane-bo…			http://www.uniprot.org/uniprot/Q6ZTN6
P37802	2.87122	1.52167	P37802	TAGLN2	GO:0032502,developmental process|GO:0060429,epithelium development|GO:0048869,cellular developmental process|GO:0030154,cell differentiation|GO:0009888,tissue development|GO:0044767,single-organism developmental process|GO:0044763,single-organism cellular process|GO:0030855,epithelial cell differentiation|GO:0009987,cellular process|GO:0044699,single-organism process|GO:0048856,anatomical structu…	GO:0043230,extracellular organelle|GO:0031982,vesicle|GO:0044421,extracellular region part|GO:0043227,membrane-bounded organelle|GO:0031988,membrane-bounded vesicle|GO:0005576,extracellular region|GO:1903561,extracellular vesicle|GO:0065010,extracellular membrane-bounded organelle|GO:0043226,organelle|GO:0070062,extracellular exosome	GO:0008092,cytoskeletal protein binding|GO:0051015,actin filament binding|GO:0003779,actin binding|GO:0044877,macromolecular complex binding|GO:0005488,binding|GO:0005515,protein binding|GO:0032403,protein complex binding		http://www.uniprot.org/uniprot/P37802

## Sheet: C-A
ID	FoldChange	Log2FoldChange	Uniprot	Genename	Biological Process	Cell Component	Molecular Function	KEGG Pathways	UNIPROT_URL
Q9BYB0	0.417675	-1.25955	Q9BYB0	SHANK3	GO:0044238,primary metabolic process|GO:0010975,regulation of neuron projection development|GO:0051049,regulation of transport|GO:0048584,positive regulation of response to stimulus|GO:0007612,learning|GO:0007613,memory|GO:0007610,behavior|GO:0007611,learning or memory|GO:0061024,membrane organization|GO:0060322,head development|GO:0007165,signal transduction|GO:0007166,cell surface receptor sign…	GO:0098590,plasma membrane region|GO:0060170,ciliary membrane|GO:0030425,dendrite|GO:0071944,cell periphery|GO:0045202,synapse|GO:0005929,cilium|GO:0043227,membrane-bounded organelle|GO:0043226,organelle|GO:0030054,cell junction|GO:0097060,synaptic membrane|GO:0031090,organelle membrane|GO:0098805,whole membrane|GO:0016020,membrane|GO:0044309,neuron spine|GO:0097458,neuron part|GO:0044456,synapse…	GO:0008022,protein C-terminus binding|GO:0030159,receptor signaling complex scaffold activity|GO:0017124,SH3 domain binding|GO:0005488,binding|GO:0043167,ion binding|GO:0043169,cation binding|GO:0046914,transition metal ion binding|GO:0005198,structural molecule activity|GO:0003779,actin binding|GO:0046872,metal ion binding|GO:0042802,identical protein binding|GO:0035255,ionotropic glutamate rece…	hsa04724,Glutamatergic synapse	http://www.uniprot.org/uniprot/Q9BYB0
Q9NYM9	0.490575	-1.02745	Q9NYM9	BET1L	GO:0008104,protein localization|GO:0060341,regulation of cellular localization|GO:0051049,regulation of transport|GO:0032386,regulation of intracellular transport|GO:0061025,membrane fusion|GO:0061024,membrane organization|GO:0050789,regulation of biological process|GO:0044699,single-organism process|GO:0051234,establishment of localization|GO:0016043,cellular component organization|GO:0065007,bi…	GO:0043229,intracellular organelle|GO:0005622,intracellular|GO:0043227,membrane-bounded organelle|GO:0031201,SNARE complex|GO:0031224,intrinsic component of membrane|GO:0005737,cytoplasm|GO:0031984,organelle subcompartment|GO:0031090,organelle membrane|GO:0016021,integral component of membrane|GO:0016020,membrane|GO:0043226,organelle|GO:0044431,Golgi apparatus part|GO:0005795,Golgi stack|GO:00057…	GO:0005484,SNAP receptor activity|GO:0005488,binding|GO:0005515,protein binding	hsa04130,SNARE interactions in vesicular transport	http://www.uniprot.org/uniprot/Q9NYM9
Q0JRZ9	0.4978	-1.00636	Q0JRZ9	FCHO2	GO:0022607,cellular component assembly|GO:0070271,protein complex biogenesis|GO:0043933,macromolecular complex subunit organization|GO:0006901,vesicle coating|GO:0006900,membrane budding|GO:0061024,membrane organization|GO:0048268,clathrin coat assembly|GO:0008104,protein localization|GO:0016050,vesicle organization|GO:0034622,cellular macromolecular complex assembly|GO:1990778,protein localizati…	GO:0030135,coated vesicle|GO:0043229,intracellular organelle|GO:0071944,cell periphery|GO:0005905,coated pit|GO:0043227,membrane-bounded organelle|GO:0043226,organelle|GO:0030136,clathrin-coated vesicle|GO:0005737,cytoplasm|GO:0031982,vesicle|GO:0016023,cytoplasmic membrane-bounded vesicle|GO:0031410,cytoplasmic vesicle|GO:0098805,whole membrane|GO:0016020,membrane|GO:0031988,membrane-bounded ves…	GO:0043168,anion binding|GO:0036094,small molecule binding|GO:0072341,modified amino acid binding|GO:0035091,phosphatidylinositol binding|GO:0016597,amino acid binding|GO:0005543,phospholipid binding|GO:0031406,carboxylic acid binding|GO:0008289,lipid binding|GO:0005546,phosphatidylinositol-4,5-bisphosphate binding|GO:0043167,ion binding|GO:1902936,phosphatidylinositol bisphosphate binding|GO:004…		http://www.uniprot.org/uniprot/Q0JRZ9
Q4V328	0.6324	-0.661091	Q4V328	GRIPAP1		GO:0005737,cytoplasm|GO:0043231,intracellular membrane-bounded organelle|GO:0044421,extracellular region part|GO:0005768,endosome|GO:0044464,cell part|GO:0044444,cytoplasmic part|GO:0005623,cell|GO:0005769,early endosome|GO:0043229,intracellular organelle|GO:0005576,extracellular region|GO:0005615,extracellular space|GO:0012505,endomembrane system|GO:0044424,intracellular part|GO:0005622,intracel…			http://www.uniprot.org/uniprot/Q4V328
O43516	1.51695	0.601174	O43516	WIPF1	GO:0006909,phagocytosis|GO:0048584,positive regulation of response to stimulus|GO:0048583,regulation of response to stimulus|GO:0008064,regulation of actin polymerization or depolymerization|GO:0007165,signal transduction|GO:0007166,cell surface receptor signaling pathway|GO:0071840,cellular component organization or biogenesis|GO:0051716,cellular response to stimulus|GO:0043207,response to exter…	GO:0015629,actin cytoskeleton|GO:0061645,endocytic patch|GO:0043229,intracellular organelle|GO:0043228,non-membrane-bounded organelle|GO:0005622,intracellular|GO:0043227,membrane-bounded organelle|GO:0043226,organelle|GO:0005856,cytoskeleton|GO:0001726,ruffle|GO:0031982,vesicle|GO:0016023,cytoplasmic membrane-bounded vesicle|GO:0031410,cytoplasmic vesicle|GO:0031988,membrane-bounded vesicle|GO:00…	GO:0008092,cytoskeletal protein binding|GO:0051015,actin filament binding|GO:0003779,actin binding|GO:0005522,profilin binding|GO:0044877,macromolecular complex binding|GO:0005488,binding|GO:0005515,protein binding|GO:0032403,protein complex binding	hsa04144,Endocytosis	http://www.uniprot.org/uniprot/O43516
O14791	1.51747	0.601673	O14791	APOL1	GO:0006869,lipid transport|GO:0006810,transport|GO:0006820,anion transport|GO:0006821,chloride transport|GO:0044281,small molecule metabolic process|GO:0044699,single-organism process|GO:0019835,cytolysis|GO:0002376,immune system process|GO:0044710,single-organism metabolic process|GO:0044364,disruption of cells of other organism|GO:1901360,organic cyclic compound metabolic process|GO:0051179,loc…	GO:0034361,very-low-density lipoprotein particle|GO:0034364,high-density lipoprotein particle|GO:0034358,plasma lipoprotein particle|GO:0032994,protein-lipid complex|GO:0044421,extracellular region part|GO:0016020,membrane|GO:0072562,blood microparticle|GO:0034385,triglyceride-rich lipoprotein particle|GO:0005576,extracellular region|GO:1990777,lipoprotein particle|GO:0044425,membrane part|GO:003…	GO:0022891,substrate-specific transmembrane transporter activity|GO:0022838,substrate-specific channel activity|GO:0005515,protein binding|GO:0005215,transporter activity|GO:0008509,anion transmembrane transporter activity|GO:0008289,lipid binding|GO:0015108,chloride transmembrane transporter activity|GO:0015075,ion transmembrane transporter activity|GO:0022857,transmembrane transporter activity|…	hsa05143,African trypanosomiasis	http://www.uniprot.org/uniprot/O14791
O43765	1.52435	0.608194	O43765	SGTA	GO:0009896,positive regulation of catabolic process|GO:0009894,regulation of catabolic process|GO:0051716,cellular response to stimulus|GO:0032436,positive regulation of proteasomal ubiquitin-dependent protein catabolic process|GO:0009893,positive regulation of metabolic process|GO:0032434,regulation of proteasomal ubiquitin-dependent protein catabolic process|GO:0010498,proteasomal protein catab…	GO:0005737,cytoplasm|GO:0005829,cytosol|GO:0016020,membrane|GO:0044464,cell part|GO:0005623,cell|GO:0005622,intracellular|GO:0044444,cytoplasmic part|GO:0044424,intracellular part	GO:0070628,proteasome binding|GO:1904288,BAT3 complex binding|GO:0044877,macromolecular complex binding|GO:0005488,binding|GO:0005515,protein binding|GO:0032403,protein complex binding		http://www.uniprot.org/uniprot/O43765
Q9NY65	1.53147	0.614922	Q9NY65	TUBA8	GO:0051258,protein polymerization|GO:0007017,microtubule-based process|GO:0071822,protein complex subunit organization|GO:0070271,protein complex biogenesis|GO:0043933,macromolecular complex subunit organization|GO:0006461,protein complex assembly|GO:0016043,cellular component organization|GO:0065003,macromolecular complex assembly|GO:0022607,cellular component assembly|GO:0044763,single-organism…	GO:0005856,cytoskeleton|GO:0043234,protein complex|GO:0015630,microtubule cytoskeleton|GO:0043228,non-membrane-bounded organelle|GO:0043232,intracellular non-membrane-bounded organelle|GO:0044464,cell part|GO:0005623,cell|GO:0005737,cytoplasm|GO:0044446,intracellular organelle part|GO:0043229,intracellular organelle|GO:0044430,cytoskeletal part|GO:0044424,intracellular part|GO:0032991,macromolecu…	GO:0005200,structural constituent of cytoskeleton|GO:0035639,purine ribonucleoside triphosphate binding|GO:0005488,binding|GO:0005198,structural molecule activity|GO:1901363,heterocyclic compound binding|GO:1901265,nucleoside phosphate binding|GO:0001882,nucleoside binding|GO:0043168,anion binding|GO:0016462,pyrophosphatase activity|GO:0000166,nucleotide binding|GO:0032561,guanyl ribonucleotide b…	hsa05130,Pathogenic Escherichia coli infection|hsa04145,Phagosome|hsa04540,Gap junction	http://www.uniprot.org/uniprot/Q9NY65
Q96C24	1.53335	0.616687	Q96C24	SYTL4	GO:0090087,regulation of peptide transport|GO:0008104,protein localization|GO:0051046,regulation of secretion|GO:0051047,positive regulation of secretion|GO:0051048,negative regulation of secretion|GO:0051049,regulation of transport|GO:0001505,regulation of neurotransmitter levels|GO:0051656,establishment of organelle localization|GO:0051650,establishment of vesicle localization|GO:0070727,cellul…	GO:0098590,plasma membrane region|GO:0031974,membrane-enclosed lumen|GO:0019898,extrinsic component of membrane|GO:0043229,intracellular organelle|GO:0043228,non-membrane-bounded organelle|GO:0030133,transport vesicle|GO:0005815,microtubule organizing center|GO:0043227,membrane-bounded organelle|GO:0043226,organelle|GO:0005856,cytoskeleton|GO:0005654,nucleoplasm|GO:0030667,secretory granule membr…	GO:0019899,enzyme binding|GO:0031267,small GTPase binding|GO:0051020,GTPase binding|GO:0005488,binding|GO:0043168,anion binding|GO:0043169,cation binding|GO:0046914,transition metal ion binding|GO:0000149,SNARE binding|GO:0005543,phospholipid binding|GO:0005544,calcium-dependent phospholipid binding|GO:0043167,ion binding|GO:0005509,calcium ion binding|GO:0046872,metal ion binding|GO:0042043,neur…		http://www.uniprot.org/uniprot/Q96C24
O15173	1.53812	0.621173	O15173	PGRMC2	GO:0043401,steroid hormone mediated signaling pathway|GO:0071383,cellular response to steroid hormone stimulus|GO:0023052,signaling|GO:0007165,signal transduction|GO:0070887,cellular response to chemical stimulus|GO:0042221,response to chemical|GO:0050789,regulation of biological process|GO:0044699,single-organism process|GO:0009755,hormone-mediated signaling pathway|GO:0051716,cellular response …	GO:0016021,integral component of membrane|GO:0016020,membrane|GO:0044464,cell part|GO:0005623,cell|GO:0012505,endomembrane system|GO:0044425,membrane part|GO:0031224,intrinsic component of membrane	GO:0038023,signaling receptor activity|GO:0020037,heme binding|GO:0046906,tetrapyrrole binding|GO:0097159,organic cyclic compound binding|GO:0008289,lipid binding|GO:0003707,steroid hormone receptor activity|GO:0060089,molecular transducer activity|GO:0004872,receptor activity|GO:0004871,signal transducer activity|GO:0005496,steroid binding|GO:1901363,heterocyclic compound binding|GO:0005488,bind…		http://www.uniprot.org/uniprot/O15173
Q14141	1.5409	0.623773	Q14141	2016-09-06	GO:0000910,cytokinesis|GO:0007049,cell cycle|GO:0009987,cellular process|GO:0044419,interspecies interaction between organisms|GO:0044764,multi-organism cellular process|GO:0044763,single-organism cellular process|GO:0051301,cell division|GO:0016032,viral process|GO:0044403,symbiosis, encompassing mutualism through parasitism|GO:0022402,cell cycle process|GO:0044699,single-organism process|GO:005…	GO:0008021,synaptic vesicle|GO:0044464,cell part|GO:0030424,axon|GO:0043229,intracellular organelle|GO:0043228,non-membrane-bounded organelle|GO:0045202,synapse|GO:0097610,cell surface furrow|GO:0043227,membrane-bounded organelle|GO:0043226,organelle|GO:0005856,cytoskeleton|GO:0043679,axon terminus|GO:0005819,spindle|GO:0031982,vesicle|GO:0016023,cytoplasmic membrane-bounded vesicle|GO:0031410,cy…	GO:0035639,purine ribonucleoside triphosphate binding|GO:0005488,binding|GO:0000166,nucleotide binding|GO:1901363,heterocyclic compound binding|GO:1901265,nucleoside phosphate binding|GO:0001882,nucleoside binding|GO:0043168,anion binding|GO:0043167,ion binding|GO:0032561,guanyl ribonucleotide binding|GO:0001883,purine nucleoside binding|GO:0032549,ribonucleoside binding|GO:0017076,purine nucleot…	hsa05100,Bacterial invasion of epithelial cells	http://www.uniprot.org/uniprot/Q14141
A0FGR8	1.55937	0.640968	A0FGR8	ESYT2	GO:0033036,macromolecule localization|GO:0006897,endocytosis|GO:0016192,vesicle-mediated transport|GO:0006869,lipid transport|GO:0006810,transport|GO:0044765,single-organism transport|GO:1902578,single-organism localization|GO:0071702,organic substance transport|GO:0051234,establishment of localization|GO:0010876,lipid localization|GO:0051179,localization|GO:0044699,single-organism process	GO:0019897,extrinsic component of plasma membrane|GO:0005783,endoplasmic reticulum|GO:0009898,cytoplasmic side of plasma membrane|GO:0005789,endoplasmic reticulum membrane|GO:0042175,nuclear outer membrane-endoplasmic reticulum membrane network|GO:0043229,intracellular organelle|GO:0071944,cell periphery|GO:0031300,intrinsic component of organelle membrane|GO:0098552,side of membrane|GO:0031226,i…	GO:0043168,anion binding|GO:0043169,cation binding|GO:0008429,phosphatidylethanolamine binding|GO:0043178,alcohol binding|GO:0035091,phosphatidylinositol binding|GO:0005543,phospholipid binding|GO:0005544,calcium-dependent phospholipid binding|GO:0008289,lipid binding|GO:0050997,quaternary ammonium group binding|GO:0043167,ion binding|GO:0070405,ammonium ion binding|GO:0031210,phosphatidylcholine…		http://www.uniprot.org/uniprot/A0FGR8
Q99685	1.59377	0.672448	Q99685	MGLL	GO:0007599,hemostasis|GO:0007596,blood coagulation|GO:0048583,regulation of response to stimulus|GO:0008277,regulation of G-protein coupled receptor protein signaling pathway|GO:0007165,signal transduction|GO:0044283,small molecule biosynthetic process|GO:0031347,regulation of defense response|GO:0044712,single-organism catabolic process|GO:0051716,cellular response to stimulus|GO:0044711,single-…	GO:0005783,endoplasmic reticulum|GO:0031974,membrane-enclosed lumen|GO:0005789,endoplasmic reticulum membrane|GO:0042175,nuclear outer membrane-endoplasmic reticulum membrane network|GO:0043229,intracellular organelle|GO:0071944,cell periphery|GO:0043227,membrane-bounded organelle|GO:0043226,organelle|GO:0005737,cytoplasm|GO:0031090,organelle membrane|GO:0031981,nuclear lumen|GO:0005634,nucleus|G…	GO:0005488,binding|GO:0016787,hydrolase activity|GO:0016788,hydrolase activity, acting on ester bonds|GO:0003824,catalytic activity|GO:0052689,carboxylic ester hydrolase activity|GO:0005515,protein binding|GO:0004622,lysophospholipase activity|GO:0004620,phospholipase activity|GO:0042803,protein homodimerization activity|GO:0016298,lipase activity|GO:0046983,protein dimerization activity|GO:00428…	hsa04923,Regulation of lipolysis in adipocytes|hsa00561,Glycerolipid metabolism|hsa04723,Retrograde endocannabinoid signaling|hsa01100,Metabolic pathways	http://www.uniprot.org/uniprot/Q99685
P37802	1.60013	0.678185	P37802	TAGLN2	GO:0032502,developmental process|GO:0060429,epithelium development|GO:0048869,cellular developmental process|GO:0030154,cell differentiation|GO:0009888,tissue development|GO:0044767,single-organism developmental process|GO:0044763,single-organism cellular process|GO:0030855,epithelial cell differentiation|GO:0009987,cellular process|GO:0044699,single-organism process|GO:0048856,anatomical structu…	GO:0043230,extracellular organelle|GO:0031982,vesicle|GO:0044421,extracellular region part|GO:0043227,membrane-bounded organelle|GO:0031988,membrane-bounded vesicle|GO:0005576,extracellular region|GO:1903561,extracellular vesicle|GO:0065010,extracellular membrane-bounded organelle|GO:0043226,organelle|GO:0070062,extracellular exosome	GO:0008092,cytoskeletal protein binding|GO:0051015,actin filament binding|GO:0003779,actin binding|GO:0044877,macromolecular complex binding|GO:0005488,binding|GO:0005515,protein binding|GO:0032403,protein complex binding		http://www.uniprot.org/uniprot/P37802
Q6PCE3	1.60082	0.678816	Q6PCE3	PGM2L1	GO:0019320,hexose catabolic process|GO:0046365,monosaccharide catabolic process|GO:0016310,phosphorylation|GO:0044249,cellular biosynthetic process|GO:0009250,glucan biosynthetic process|GO:0034645,cellular macromolecule biosynthetic process|GO:0006091,generation of precursor metabolites and energy|GO:0019388,galactose catabolic process|GO:0044699,single-organism process|GO:0044712,single-organis…	GO:0005737,cytoplasm|GO:0005829,cytosol|GO:0044464,cell part|GO:0005623,cell|GO:0005622,intracellular|GO:0044444,cytoplasmic part|GO:0044424,intracellular part	GO:0043169,cation binding|GO:0016853,isomerase activity|GO:0016773,phosphotransferase activity, alcohol group as acceptor|GO:0016772,transferase activity, transferring phosphorus-containing groups|GO:0016301,kinase activity|GO:0043167,ion binding|GO:0003824,catalytic activity|GO:0016740,transferase activity|GO:0047933,glucose-1,6-bisphosphate synthase activity|GO:0005488,binding|GO:0004614,phosph…	hsa00500,Starch and sucrose metabolism	http://www.uniprot.org/uniprot/Q6PCE3
P07948	1.60175	0.679649	P07948	LYN	GO:0043303,mast cell degranulation|GO:0006909,phagocytosis|GO:0051046,regulation of secretion|GO:0051049,regulation of transport|GO:0034605,cellular response to heat|GO:0007596,blood coagulation|GO:0002703,regulation of leukocyte mediated immunity|GO:0060402,calcium ion transport into cytosol|GO:0007599,hemostasis|GO:0043200,response to amino acid|GO:0051716,cellular response to stimulus|GO:00432…	GO:0019897,extrinsic component of plasma membrane|GO:0098636,protein complex involved in cell adhesion|GO:0009898,cytoplasmic side of plasma membrane|GO:0000323,lytic vacuole|GO:0005887,integral component of plasma membrane|GO:0044421,extracellular region part|GO:0044444,cytoplasmic part|GO:0031970,organelle envelope lumen|GO:0031974,membrane-enclosed lumen|GO:0098802,plasma membrane receptor com…	GO:0005488,binding|GO:0044389,ubiquitin-like protein ligase binding|GO:0035639,purine ribonucleoside triphosphate binding|GO:0005161,platelet-derived growth factor receptor binding|GO:0017124,SH3 domain binding|GO:0019899,enzyme binding|GO:0060089,molecular transducer activity|GO:0044877,macromolecular complex binding|GO:0004672,protein kinase activity|GO:0004871,signal transducer activity|GO:004…	hsa05120,Epithelial cell signaling in Helicobacter pylori infection|hsa04611,Platelet activation|hsa05203,Viral carcinogenesis|hsa04662,B cell receptor signaling pathway|hsa04664,Fc epsilon RI signaling pathway|hsa05169,Epstein-Barr virus infection|hsa04666,Fc gamma R-mediated phagocytosis|hsa04064,NF-kappa B signaling pathway|hsa04062,Chemokine signaling pathway|hsa04730,Long-term depression	http://www.uniprot.org/uniprot/P07948
Q6VY07	1.6161	0.692516	Q6VY07	PACS1	GO:0008104,protein localization|GO:0050688,regulation of defense response to virus|GO:0032101,regulation of response to external stimulus|GO:0034067,protein localization to Golgi apparatus|GO:0050896,response to stimulus|GO:0072661,protein targeting to plasma membrane|GO:0006612,protein targeting to membrane|GO:0048583,regulation of response to stimulus|GO:0072600,establishment of protein localiz…	GO:0030135,coated vesicle|GO:0043229,intracellular organelle|GO:0043227,membrane-bounded organelle|GO:0043226,organelle|GO:0030137,COPI-coated vesicle|GO:0005737,cytoplasm|GO:0031982,vesicle|GO:0016023,cytoplasmic membrane-bounded vesicle|GO:0031410,cytoplasmic vesicle|GO:0031988,membrane-bounded vesicle|GO:0044431,Golgi apparatus part|GO:0048471,perinuclear region of cytoplasm|GO:0005794,Golgi a…	GO:0044325,ion channel binding|GO:0005488,binding|GO:0005515,protein binding		http://www.uniprot.org/uniprot/Q6VY07
O75396	1.62522	0.700639	O75396	SEC22B	GO:0009896,positive regulation of catabolic process|GO:0009894,regulation of catabolic process|GO:0008104,protein localization|GO:0080090,regulation of primary metabolic process|GO:0019222,regulation of metabolic process|GO:0033043,regulation of organelle organization|GO:0051128,regulation of cellular component organization|GO:0042176,regulation of protein catabolic process|GO:0051641,cellular lo…	GO:0005783,endoplasmic reticulum|GO:0033116,endoplasmic reticulum-Golgi intermediate compartment membrane|GO:0005789,endoplasmic reticulum membrane|GO:0042175,nuclear outer membrane-endoplasmic reticulum membrane network|GO:0043229,intracellular organelle|GO:0005622,intracellular|GO:0043227,membrane-bounded organelle|GO:0043226,organelle|GO:0031224,intrinsic component of membrane|GO:0005737,cytop…	GO:0000149,SNARE binding|GO:0019905,syntaxin binding|GO:0005488,binding|GO:0005515,protein binding	hsa04145,Phagosome|hsa04130,SNARE interactions in vesicular transport|hsa05134,Legionellosis	http://www.uniprot.org/uniprot/O75396
Q86UX7	1.63983	0.713542	Q86UX7	FERMT3	GO:0022607,cellular component assembly|GO:0016337,single organismal cell-cell adhesion|GO:0034446,substrate adhesion-dependent cell spreading|GO:0043933,macromolecular complex subunit organization|GO:0050896,response to stimulus|GO:0030155,regulation of cell adhesion|GO:0030154,cell differentiation|GO:0048468,cell development|GO:0007596,blood coagulation|GO:0022407,regulation of cell-cell adhesio…	GO:0015629,actin cytoskeleton|GO:0043229,intracellular organelle|GO:0043228,non-membrane-bounded organelle|GO:0005623,cell|GO:0043227,membrane-bounded organelle|GO:0043226,organelle|GO:0030054,cell junction|GO:0005856,cytoskeleton|GO:0002102,podosome|GO:0031982,vesicle|GO:0016020,membrane|GO:0031988,membrane-bounded vesicle|GO:0044430,cytoskeletal part|GO:0032991,macromolecular complex|GO:0042995…	GO:0005178,integrin binding|GO:0044877,macromolecular complex binding|GO:0005488,binding|GO:0005515,protein binding|GO:0032403,protein complex binding|GO:0005102,receptor binding|GO:0050839,cell adhesion molecule binding	hsa04611,Platelet activation	http://www.uniprot.org/uniprot/Q86UX7
Q12846	1.6471	0.719928	Q12846	STX4	GO:0035774,positive regulation of insulin secretion involved in cellular response to glucose stimulus|GO:0032024,positive regulation of insulin secretion|GO:2001236,regulation of extrinsic apoptotic signaling pathway|GO:0006887,exocytosis|GO:0007599,hemostasis|GO:0019222,regulation of metabolic process|GO:2001233,regulation of apoptotic signaling pathway|GO:0051049,regulation of transport|GO:0008…	GO:0008021,synaptic vesicle|GO:0042995,cell projection|GO:0043219,lateral loop|GO:0098590,plasma membrane region|GO:0044421,extracellular region part|GO:0030425,dendrite|GO:0043229,intracellular organelle|GO:0071944,cell periphery|GO:0045202,synapse|GO:0031201,SNARE complex|GO:0043227,membrane-bounded organelle|GO:0043226,organelle|GO:0031224,intrinsic component of membrane|GO:0005737,cytoplasm|G…	GO:0005488,binding|GO:0016230,sphingomyelin phosphodiesterase activator activity|GO:0060229,lipase activator activity|GO:0008047,enzyme activator activity|GO:0005515,protein binding|GO:0000149,SNARE binding|GO:0005484,SNAP receptor activity|GO:0098772,molecular function regulator|GO:0030234,enzyme regulator activity|GO:0016004,phospholipase activator activity	hsa04962,Vasopressin-regulated water reabsorption|hsa04130,SNARE interactions in vesicular transport	http://www.uniprot.org/uniprot/Q12846
P01861	1.65335	0.725392	P01861	IGHG4	GO:0044238,primary metabolic process|GO:0006909,phagocytosis|GO:0006950,response to stress|GO:0048584,positive regulation of response to stimulus|GO:0048583,regulation of response to stimulus|GO:0023052,signaling|GO:0007165,signal transduction|GO:0007166,cell surface receptor signaling pathway|GO:0002455,humoral immune response mediated by circulating immunoglobulin|GO:0050789,regulation of biolo…	GO:0043230,extracellular organelle|GO:0031982,vesicle|GO:0044421,extracellular region part|GO:0043227,membrane-bounded organelle|GO:0072562,blood microparticle|GO:0031988,membrane-bounded vesicle|GO:0005576,extracellular region|GO:0005615,extracellular space|GO:1903561,extracellular vesicle|GO:0065010,extracellular membrane-bounded organelle|GO:0043226,organelle|GO:0070062,extracellular exosome	GO:0005488,binding|GO:0003823,antigen binding		http://www.uniprot.org/uniprot/P01861
P68871	1.67877	0.747409	P68871	HBB	GO:0007599,hemostasis|GO:0019222,regulation of metabolic process|GO:0007596,blood coagulation|GO:0006820,anion transport|GO:0003013,circulatory system process|GO:0003014,renal system process|GO:0044281,small molecule metabolic process|GO:0003018,vascular process in circulatory system|GO:0071840,cellular component organization or biogenesis|GO:0044712,single-organism catabolic process|GO:0044710,s…	GO:0031974,membrane-enclosed lumen|GO:0030139,endocytic vesicle|GO:0043229,intracellular organelle|GO:0060205,cytoplasmic membrane-bounded vesicle lumen|GO:0031988,membrane-bounded vesicle|GO:0043227,membrane-bounded organelle|GO:0043226,organelle|GO:0005737,cytoplasm|GO:0031983,vesicle lumen|GO:0070062,extracellular exosome|GO:0071682,endocytic vesicle lumen|GO:0016023,cytoplasmic membrane-bound…	GO:0005344,oxygen transporter activity|GO:0005488,binding|GO:1901363,heterocyclic compound binding|GO:0016491,oxidoreductase activity|GO:0043169,cation binding|GO:0016684,oxidoreductase activity, acting on peroxide as acceptor|GO:0046914,transition metal ion binding|GO:0043167,ion binding|GO:0005506,iron ion binding|GO:0046872,metal ion binding|GO:0020037,heme binding|GO:0005215,transporter activ…	hsa05143,African trypanosomiasis|hsa05144,Malaria	http://www.uniprot.org/uniprot/P68871
P53621	1.67992	0.748397	P53621	COPA	GO:0033036,macromolecule localization|GO:0008104,protein localization|GO:0022600,digestive system process|GO:0048200,Golgi transport vesicle coating|GO:0006901,vesicle coating|GO:0048205,COPI coating of Golgi vesicle|GO:0006903,vesicle targeting|GO:0061024,membrane organization|GO:0032941,secretion by tissue|GO:0051641,cellular localization|GO:0051640,organelle localization|GO:0051656,establishme…	GO:0031090,organelle membrane|GO:0043229,intracellular organelle|GO:0030117,membrane coat|GO:0005622,intracellular|GO:0030135,coated vesicle|GO:0043226,organelle|GO:0030137,COPI-coated vesicle|GO:0005737,cytoplasm|GO:0070062,extracellular exosome|GO:0030663,COPI-coated vesicle membrane|GO:0030662,coated vesicle membrane|GO:0016023,cytoplasmic membrane-bounded vesicle|GO:0031410,cytoplasmic vesicl…	GO:0005179,hormone activity|GO:0005198,structural molecule activity|GO:0005488,binding|GO:0005515,protein binding|GO:0005102,receptor binding		http://www.uniprot.org/uniprot/P53621
P24844	1.7183	0.780982	P24844	MYL9	GO:0050817,coagulation|GO:0006936,muscle contraction|GO:0044707,single-multicellular organism process|GO:0016337,single organismal cell-cell adhesion|GO:0007409,axonogenesis|GO:0030030,cell projection organization|GO:0031175,neuron projection development|GO:0048468,cell development|GO:0006928,movement of cell or subcellular component|GO:0007596,blood coagulation|GO:0003012,muscle system process|G…	GO:0032432,actin filament bundle|GO:0015629,actin cytoskeleton|GO:0030016,myofibril|GO:0030017,sarcomere|GO:0043229,intracellular organelle|GO:0043228,non-membrane-bounded organelle|GO:0044430,cytoskeletal part|GO:0043226,organelle|GO:0030018,Z disc|GO:0042641,actomyosin|GO:0005856,cytoskeleton|GO:0001725,stress fiber|GO:0031674,I band|GO:0005859,muscle myosin complex|GO:0016459,myosin complex|GO…	GO:0032036,myosin heavy chain binding|GO:0043169,cation binding|GO:0005198,structural molecule activity|GO:0008092,cytoskeletal protein binding|GO:0017022,myosin binding|GO:0043167,ion binding|GO:0008307,structural constituent of muscle|GO:0005509,calcium ion binding|GO:0005515,protein binding|GO:0046872,metal ion binding|GO:0005488,binding	hsa04022,cGMP-PKG signaling pathway|hsa04024,cAMP signaling pathway|hsa04530,Tight junction|hsa04670,Leukocyte transendothelial migration|hsa04510,Focal adhesion|hsa04810,Regulation of actin cytoskeleton|hsa04921,Oxytocin signaling pathway|hsa04270,Vascular smooth muscle contraction	http://www.uniprot.org/uniprot/P24844
P31146	1.79875	0.846995	P31146	CORO1A	GO:0006887,exocytosis|GO:0006909,phagocytosis|GO:0034112,positive regulation of homotypic cell-cell adhesion|GO:0051234,establishment of localization|GO:0034110,regulation of homotypic cell-cell adhesion|GO:0051049,regulation of transport|GO:0032386,regulation of intracellular transport|GO:0006906,vesicle fusion|GO:0051282,regulation of sequestering of calcium ion|GO:0051283,negative regulation o…	GO:0005911,cell-cell junction|GO:0042995,cell projection|GO:0015629,actin cytoskeleton|GO:0044421,extracellular region part|GO:0043232,intracellular non-membrane-bounded organelle|GO:0030424,axon|GO:0030139,endocytic vesicle|GO:0043229,intracellular organelle|GO:0043228,non-membrane-bounded organelle|GO:0005622,intracellular|GO:0043227,membrane-bounded organelle|GO:0043226,organelle|GO:0030054,ce…	GO:0032036,myosin heavy chain binding|GO:0008022,protein C-terminus binding|GO:0005515,protein binding|GO:0008092,cytoskeletal protein binding|GO:0097159,organic cyclic compound binding|GO:0044822,poly(A) RNA binding|GO:0051015,actin filament binding|GO:0003779,actin binding|GO:0017022,myosin binding|GO:0044877,macromolecular complex binding|GO:0003723,RNA binding|GO:0003676,nucleic acid binding|…	hsa04145,Phagosome|hsa05152,Tuberculosis	http://www.uniprot.org/uniprot/P31146
Q00013	1.8022	0.849759	Q00013	MPP1	GO:0051716,cellular response to stimulus|GO:0008152,metabolic process|GO:0032101,regulation of response to external stimulus|GO:0016310,phosphorylation|GO:1990266,neutrophil migration|GO:0048583,regulation of response to stimulus|GO:0007610,behavior|GO:0006928,movement of cell or subcellular component|GO:0050900,leukocyte migration|GO:0006807,nitrogen compound metabolic process|GO:1902622,regulat…	GO:0005902,microvillus|GO:0043228,non-membrane-bounded organelle|GO:0005622,intracellular|GO:0031226,intrinsic component of plasma membrane|GO:0043226,organelle|GO:0031224,intrinsic component of membrane|GO:0005856,cytoskeleton|GO:0016021,integral component of membrane|GO:0016020,membrane|GO:0044459,plasma membrane part|GO:0032421,stereocilium bundle|GO:0032420,stereocilium|GO:0005938,cell cortex…	GO:0019201,nucleotide kinase activity|GO:0019205,nucleobase-containing compound kinase activity|GO:0016772,transferase activity, transferring phosphorus-containing groups|GO:0016301,kinase activity|GO:0004385,guanylate kinase activity|GO:0016776,phosphotransferase activity, phosphate group as acceptor|GO:0003824,catalytic activity|GO:0016740,transferase activity|GO:0005488,binding|GO:0005515,prot…		http://www.uniprot.org/uniprot/Q00013
Q9NR12	1.80365	0.850919	Q9NR12	PDLIM7	GO:0006898,receptor-mediated endocytosis|GO:0030154,cell differentiation|GO:0030036,actin cytoskeleton organization|GO:0001503,ossification|GO:0071840,cellular component organization or biogenesis|GO:0007275,multicellular organismal development|GO:0001649,osteoblast differentiation|GO:0048869,cellular developmental process|GO:0051240,positive regulation of multicellular organismal process|GO:0016…	GO:0032432,actin filament bundle|GO:0015629,actin cytoskeleton|GO:0043229,intracellular organelle|GO:0043228,non-membrane-bounded organelle|GO:0005924,cell-substrate adherens junction|GO:0005925,focal adhesion|GO:0043227,membrane-bounded organelle|GO:0043226,organelle|GO:0030054,cell junction|GO:0030055,cell-substrate junction|GO:0005856,cytoskeleton|GO:0001725,stress fiber|GO:0001726,ruffle|GO:0…	GO:0043169,cation binding|GO:0046914,transition metal ion binding|GO:0043167,ion binding|GO:0008270,zinc ion binding|GO:0005515,protein binding|GO:0046872,metal ion binding|GO:0005488,binding		http://www.uniprot.org/uniprot/Q9NR12
Q13442	1.81268	0.85812	Q13442	PDAP1	GO:0044700,single organism signaling|GO:0051716,cellular response to stimulus|GO:0008283,cell proliferation|GO:0050896,response to stimulus|GO:0009987,cellular process|GO:0044763,single-organism cellular process|GO:0050794,regulation of cellular process|GO:0065007,biological regulation|GO:0023052,signaling|GO:0007165,signal transduction|GO:0007154,cell communication|GO:0050789,regulation of biolo…		GO:0097159,organic cyclic compound binding|GO:0044822,poly(A) RNA binding|GO:0005488,binding|GO:0003676,nucleic acid binding|GO:1901363,heterocyclic compound binding|GO:0003723,RNA binding		http://www.uniprot.org/uniprot/Q13442
P61978	1.8371	0.87743	P61978	HNRNPK	GO:0080090,regulation of primary metabolic process|GO:0019222,regulation of metabolic process|GO:0051049,regulation of transport|GO:0007165,signal transduction|GO:0048260,positive regulation of receptor-mediated endocytosis|GO:1901362,organic cyclic compound biosynthetic process|GO:0071840,cellular component organization or biogenesis|GO:0051716,cellular response to stimulus|GO:0010604,positive r…	GO:0042995,cell projection|GO:0015629,actin cytoskeleton|GO:0005924,cell-substrate adherens junction|GO:0031974,membrane-enclosed lumen|GO:0043229,intracellular organelle|GO:0043228,non-membrane-bounded organelle|GO:0000785,chromatin|GO:0000228,nuclear chromosome|GO:0005925,focal adhesion|GO:0043227,membrane-bounded organelle|GO:0043226,organelle|GO:0030054,cell junction|GO:0030055,cell-substrate…	GO:0001012,RNA polymerase II regulatory region DNA binding|GO:0001159,core promoter proximal region DNA binding|GO:0001077,transcriptional activator activity, RNA polymerase II core promoter proximal region sequence-specific binding|GO:0005488,binding|GO:0003676,nucleic acid binding|GO:0003677,DNA binding|GO:1901363,heterocyclic compound binding|GO:0043565,sequence-specific DNA binding|GO:0043566…	hsa05206,MicroRNAs in cancer|hsa05168,Herpes simplex infection|hsa03040,Spliceosome|hsa05203,Viral carcinogenesis	http://www.uniprot.org/uniprot/P61978
Q8NBN3	1.83955	0.879353	Q8NBN3	TMEM87A		GO:0044425,membrane part|GO:0016021,integral component of membrane|GO:0016020,membrane|GO:0031224,intrinsic component of membrane			http://www.uniprot.org/uniprot/Q8NBN3
P13861	1.8398	0.879549	P13861	PRKAR2A	GO:0090087,regulation of peptide transport|GO:0043549,regulation of kinase activity|GO:0019220,regulation of phosphate metabolic process|GO:0080090,regulation of primary metabolic process|GO:0019222,regulation of metabolic process|GO:0051049,regulation of transport|GO:0007596,blood coagulation|GO:0032147,activation of protein kinase activity|GO:0008104,protein localization|GO:0003014,renal system…	GO:0098590,plasma membrane region|GO:0044463,cell projection part|GO:0043229,intracellular organelle|GO:0043228,non-membrane-bounded organelle|GO:0005929,cilium|GO:0005924,cell-substrate adherens junction|GO:0005925,focal adhesion|GO:0043227,membrane-bounded organelle|GO:0043226,organelle|GO:0030054,cell junction|GO:0030055,cell-substrate junction|GO:0005856,cytoskeleton|GO:0098589,membrane regio…	GO:0044389,ubiquitin-like protein ligase binding|GO:0019207,kinase regulator activity|GO:0019901,protein kinase binding|GO:0019899,enzyme binding|GO:0036094,small molecule binding|GO:0005488,binding|GO:0004857,enzyme inhibitor activity|GO:0098772,molecular function regulator|GO:1901363,heterocyclic compound binding|GO:1901265,nucleoside phosphate binding|GO:0043168,anion binding|GO:0008603,cAMP-d…	hsa04210,Apoptosis|hsa04910,Insulin signaling pathway	http://www.uniprot.org/uniprot/P13861
Q05682	1.88857	0.917298	Q05682	CALD1	GO:0032501,multicellular organismal process|GO:0006936,muscle contraction|GO:0044707,single-multicellular organism process|GO:0009987,cellular process|GO:0006928,movement of cell or subcellular component|GO:0003012,muscle system process|GO:0044763,single-organism cellular process|GO:0044699,single-organism process|GO:0003008,system process	GO:0015629,actin cytoskeleton|GO:0030016,myofibril|GO:0043229,intracellular organelle|GO:0043228,non-membrane-bounded organelle|GO:0005622,intracellular|GO:0043226,organelle|GO:0005856,cytoskeleton|GO:0016020,membrane|GO:0044430,cytoskeletal part|GO:0005737,cytoplasm|GO:0030478,actin cap|GO:0044424,intracellular part|GO:0005938,cell cortex|GO:0005886,plasma membrane|GO:0043232,intracellular non-m…	GO:0008092,cytoskeletal protein binding|GO:0017022,myosin binding|GO:0003779,actin binding|GO:0005516,calmodulin binding|GO:0005515,protein binding|GO:0005523,tropomyosin binding|GO:0005488,binding	hsa04270,Vascular smooth muscle contraction	http://www.uniprot.org/uniprot/Q05682
Q6ZTN6	2.00108	1.00078	Q6ZTN6	ANKRD13D		GO:0005737,cytoplasm|GO:0016020,membrane|GO:0043231,intracellular membrane-bounded organelle|GO:0005768,endosome|GO:0005770,late endosome|GO:0044464,cell part|GO:0044444,cytoplasmic part|GO:0005623,cell|GO:0005622,intracellular|GO:0043229,intracellular organelle|GO:0071944,cell periphery|GO:0012505,endomembrane system|GO:0005886,plasma membrane|GO:0044424,intracellular part|GO:0043227,membrane-bo…			http://www.uniprot.org/uniprot/Q6ZTN6
P21291	2.0205	1.01471	P21291	CSRP1	GO:0016337,single organismal cell-cell adhesion|GO:0007596,blood coagulation|GO:0032501,multicellular organismal process|GO:0007599,hemostasis|GO:0044699,single-organism process|GO:0009611,response to wounding|GO:0065007,biological regulation|GO:0065008,regulation of biological quality|GO:0098602,single organism cell adhesion|GO:0050878,regulation of body fluid levels|GO:0098609,cell-cell adhesio…	GO:0043229,intracellular organelle|GO:0005924,cell-substrate adherens junction|GO:0005925,focal adhesion|GO:0043227,membrane-bounded organelle|GO:0043226,organelle|GO:0030054,cell junction|GO:0030055,cell-substrate junction|GO:0031982,vesicle|GO:0005634,nucleus|GO:0031988,membrane-bounded vesicle|GO:0070161,anchoring junction|GO:0005912,adherens junction|GO:1903561,extracellular vesicle|GO:007006…	GO:0005488,binding|GO:0043169,cation binding|GO:0046914,transition metal ion binding|GO:0097159,organic cyclic compound binding|GO:0044822,poly(A) RNA binding|GO:0043167,ion binding|GO:0008270,zinc ion binding|GO:0003676,nucleic acid binding|GO:0046872,metal ion binding|GO:1901363,heterocyclic compound binding|GO:0003723,RNA binding		http://www.uniprot.org/uniprot/P21291
Q9UBC2	2.12435	1.08702	Q9UBC2	EPS15L1	GO:0048585,negative regulation of response to stimulus|GO:0007167,enzyme linked receptor protein signaling pathway|GO:0048583,regulation of response to stimulus|GO:0042059,negative regulation of epidermal growth factor receptor signaling pathway|GO:0042058,regulation of epidermal growth factor receptor signaling pathway|GO:0023057,negative regulation of signaling|GO:0023052,signaling|GO:0010648,n…	GO:0043229,intracellular organelle|GO:0071944,cell periphery|GO:0030117,membrane coat|GO:0005905,coated pit|GO:0030118,clathrin coat|GO:0043227,membrane-bounded organelle|GO:0043226,organelle|GO:0005737,cytoplasm|GO:0030132,clathrin coat of coated pit|GO:0005634,nucleus|GO:0016020,membrane|GO:0044459,plasma membrane part|GO:0048475,coated membrane|GO:0098589,membrane region|GO:0012505,endomembran…	GO:0043169,cation binding|GO:0043167,ion binding|GO:0005488,binding|GO:0005515,protein binding|GO:0046872,metal ion binding|GO:0005509,calcium ion binding	hsa04144,Endocytosis	http://www.uniprot.org/uniprot/Q9UBC2
Q9H939	2.20615	1.14153	Q9H939	PSTPIP2	GO:0006996,organelle organization|GO:0040011,locomotion|GO:0007010,cytoskeleton organization|GO:0048870,cell motility|GO:0009987,cellular process|GO:0016043,cellular component organization|GO:0006928,movement of cell or subcellular component|GO:0051674,localization of cell|GO:0044763,single-organism cellular process|GO:0071840,cellular component organization or biogenesis|GO:0016477,cell migratio…	GO:0005856,cytoskeleton|GO:0005737,cytoplasm|GO:0043232,intracellular non-membrane-bounded organelle|GO:0005829,cytosol|GO:0016020,membrane|GO:0044464,cell part|GO:0044444,cytoplasmic part|GO:0005623,cell|GO:0005622,intracellular|GO:0043229,intracellular organelle|GO:0043228,non-membrane-bounded organelle|GO:0044424,intracellular part|GO:0043226,organelle	GO:0003779,actin binding|GO:0005488,binding|GO:0005515,protein binding|GO:0008092,cytoskeletal protein binding		http://www.uniprot.org/uniprot/Q9H939
O75116	2.23965	1.16327	O75116	ROCK2	GO:0043933,macromolecular complex subunit organization|GO:0019220,regulation of phosphate metabolic process|GO:0080090,regulation of primary metabolic process|GO:0019222,regulation of metabolic process|GO:0060429,epithelium development|GO:0048468,cell development|GO:0016358,dendrite development|GO:0007160,cell-matrix adhesion|GO:0072359,circulatory system development|GO:0072358,cardiovascular sys…	GO:0035770,ribonucleoprotein granule|GO:0043229,intracellular organelle|GO:0043228,non-membrane-bounded organelle|GO:0036464,cytoplasmic ribonucleoprotein granule|GO:0031616,spindle pole centrosome|GO:0005815,microtubule organizing center|GO:0043227,membrane-bounded organelle|GO:0043226,organelle|GO:0005856,cytoskeleton|GO:0000922,spindle pole|GO:0005819,spindle|GO:0005813,centrosome|GO:0005634,n…	GO:0035639,purine ribonucleoside triphosphate binding|GO:0017048,Rho GTPase binding|GO:0031267,small GTPase binding|GO:0051020,GTPase binding|GO:0004672,protein kinase activity|GO:0003676,nucleic acid binding|GO:0000166,nucleotide binding|GO:1901363,heterocyclic compound binding|GO:0001883,purine nucleoside binding|GO:0001882,nucleoside binding|GO:0043168,anion binding|GO:0043169,cation binding|G…	hsa05132,Salmonella infection|hsa05131,Shigellosis|hsa05130,Pathogenic Escherichia coli infection|hsa04611,Platelet activation|hsa04022,cGMP-PKG signaling pathway|hsa04062,Chemokine signaling pathway|hsa05200,Pathways in cancer|hsa04024,cAMP signaling pathway|hsa04071,Sphingolipid signaling pathway|hsa05205,Proteoglycans in cancer|hsa04670,Leukocyte transendothelial migration|hsa04510,Focal adhes…	http://www.uniprot.org/uniprot/O75116
Q16512	2.32362	1.21638	Q16512	PKN1	GO:0006366,transcription from RNA polymerase II promoter|GO:0043549,regulation of kinase activity|GO:0019220,regulation of phosphate metabolic process|GO:0080090,regulation of primary metabolic process|GO:0019222,regulation of metabolic process|GO:0001667,ameboidal-type cell migration|GO:0048584,positive regulation of response to stimulus|GO:0048583,regulation of response to stimulus|GO:0032147,a…	GO:0044464,cell part|GO:0031974,membrane-enclosed lumen|GO:0043229,intracellular organelle|GO:0071944,cell periphery|GO:0097610,cell surface furrow|GO:0043227,membrane-bounded organelle|GO:0043226,organelle|GO:0005737,cytoplasm|GO:0031982,vesicle|GO:0031981,nuclear lumen|GO:0016023,cytoplasmic membrane-bounded vesicle|GO:0031410,cytoplasmic vesicle|GO:0005634,nucleus|GO:0016020,membrane|GO:003198…	GO:0000988,transcription factor activity, protein binding|GO:0042393,histone binding|GO:0035639,purine ribonucleoside triphosphate binding|GO:0005080,protein kinase C binding|GO:0050681,androgen receptor binding|GO:0017048,Rho GTPase binding|GO:0017049,GTP-Rho binding|GO:0031267,small GTPase binding|GO:0051020,GTPase binding|GO:0044877,macromolecular complex binding|GO:0004672,protein kinase acti…	hsa05132,Salmonella infection|hsa04151,PI3K-Akt signaling pathway	http://www.uniprot.org/uniprot/Q16512
Q15555	2.39447	1.25971	Q15555	MAPRE2	GO:1903047,mitotic cell cycle process|GO:0023052,signaling|GO:0007165,signal transduction|GO:0051301,cell division|GO:0007067,mitotic nuclear division|GO:0050789,regulation of biological process|GO:0044699,single-organism process|GO:0051716,cellular response to stimulus|GO:0000280,nuclear division|GO:0016043,cellular component organization|GO:0065007,biological regulation|GO:0071840,cellular comp…	GO:0005856,cytoskeleton|GO:0043234,protein complex|GO:0015630,microtubule cytoskeleton|GO:0043228,non-membrane-bounded organelle|GO:0005622,intracellular|GO:0043232,intracellular non-membrane-bounded organelle|GO:0035371,microtubule plus-end|GO:0044464,cell part|GO:0005623,cell|GO:0005737,cytoplasm|GO:0044446,intracellular organelle part|GO:0043229,intracellular organelle|GO:0044430,cytoskeletal …	GO:0015631,tubulin binding|GO:0008092,cytoskeletal protein binding|GO:0008017,microtubule binding|GO:0044877,macromolecular complex binding|GO:0005488,binding|GO:0005515,protein binding|GO:0032403,protein complex binding		http://www.uniprot.org/uniprot/Q15555
P07437	2.9333	1.55252	P07437	TUBB	GO:0022607,cellular component assembly|GO:0044839,cell cycle G2/M phase transition|GO:0070271,protein complex biogenesis|GO:0000086,G2/M transition of mitotic cell cycle|GO:0006955,immune response|GO:1903047,mitotic cell cycle process|GO:0006928,movement of cell or subcellular component|GO:0044770,cell cycle phase transition|GO:0044772,mitotic cell cycle phase transition|GO:0022402,cell cycle pro…	GO:0035770,ribonucleoprotein granule|GO:0044421,extracellular region part|GO:0031970,organelle envelope lumen|GO:0031974,membrane-enclosed lumen|GO:0031975,envelope|GO:0043229,intracellular organelle|GO:0043228,non-membrane-bounded organelle|GO:0036464,cytoplasmic ribonucleoprotein granule|GO:0030529,ribonucleoprotein complex|GO:0005874,microtubule|GO:0043226,organelle|GO:0005856,cytoskeleton|GO:…	GO:0005200,structural constituent of cytoskeleton|GO:0044389,ubiquitin-like protein ligase binding|GO:0035639,purine ribonucleoside triphosphate binding|GO:0032794,GTPase activating protein binding|GO:0019899,enzyme binding|GO:0044877,macromolecular complex binding|GO:0005488,binding|GO:0000166,nucleotide binding|GO:1901363,heterocyclic compound binding|GO:0001883,purine nucleoside binding|GO:000…	hsa05130,Pathogenic Escherichia coli infection|hsa04145,Phagosome|hsa04540,Gap junction	http://www.uniprot.org/uniprot/P07437
Q9H4B7	2.93958	1.55561	Q9H4B7	TUBB1	GO:0022607,cellular component assembly|GO:0006457,protein folding|GO:0070271,protein complex biogenesis|GO:0043933,macromolecular complex subunit organization|GO:0006458,'de novo' protein folding|GO:0000226,microtubule cytoskeleton organization|GO:0034622,cellular macromolecular complex assembly|GO:0051225,spindle assembly|GO:0044699,single-organism process|GO:0044267,cellular protein metabolic p…	GO:0043229,intracellular organelle|GO:0043228,non-membrane-bounded organelle|GO:0005874,microtubule|GO:0043226,organelle|GO:0005856,cytoskeleton|GO:0031982,vesicle|GO:0043227,membrane-bounded organelle|GO:0031988,membrane-bounded vesicle|GO:0044430,cytoskeletal part|GO:0005737,cytoplasm|GO:0015630,microtubule cytoskeleton|GO:0032991,macromolecular complex|GO:1903561,extracellular vesicle|GO:00700…	GO:0005200,structural constituent of cytoskeleton|GO:0035639,purine ribonucleoside triphosphate binding|GO:0005488,binding|GO:0005198,structural molecule activity|GO:1901363,heterocyclic compound binding|GO:1901265,nucleoside phosphate binding|GO:0001882,nucleoside binding|GO:0043168,anion binding|GO:0016462,pyrophosphatase activity|GO:0000166,nucleotide binding|GO:0032561,guanyl ribonucleotide b…	hsa05130,Pathogenic Escherichia coli infection|hsa04145,Phagosome|hsa04540,Gap junction	http://www.uniprot.org/uniprot/Q9H4B7
P08567	3.07903	1.62247	P08567	PLEK	GO:0043933,macromolecular complex subunit organization|GO:0019220,regulation of phosphate metabolic process|GO:0080090,regulation of primary metabolic process|GO:0019222,regulation of metabolic process|GO:0006904,vesicle docking involved in exocytosis|GO:0048585,negative regulation of response to stimulus|GO:0048584,positive regulation of response to stimulus|GO:0048583,regulation of response to …	GO:0098590,plasma membrane region|GO:0071944,cell periphery|GO:0005737,cytoplasm|GO:0001726,ruffle|GO:0098805,whole membrane|GO:0016020,membrane|GO:0044459,plasma membrane part|GO:0031256,leading edge membrane|GO:0098589,membrane region|GO:0031253,cell projection membrane|GO:0031252,cell leading edge|GO:0005886,plasma membrane|GO:0042995,cell projection|GO:0032587,ruffle membrane|GO:0005829,cytos…	GO:0043168,anion binding|GO:0019901,protein kinase binding|GO:0035091,phosphatidylinositol binding|GO:0005080,protein kinase C binding|GO:0005543,phospholipid binding|GO:0008289,lipid binding|GO:0019899,enzyme binding|GO:0043167,ion binding|GO:1902936,phosphatidylinositol bisphosphate binding|GO:0019900,kinase binding|GO:0043325,phosphatidylinositol-3,4-bisphosphate binding|GO:0005488,binding|GO:…		http://www.uniprot.org/uniprot/P08567
P68363	3.24085	1.69637	P68363	TUBA1B	GO:0022607,cellular component assembly|GO:0006457,protein folding|GO:0070271,protein complex biogenesis|GO:0043933,macromolecular complex subunit organization|GO:0006458,'de novo' protein folding|GO:0000226,microtubule cytoskeleton organization|GO:0070887,cellular response to chemical stimulus|GO:0034622,cellular macromolecular complex assembly|GO:0044699,single-organism process|GO:0044267,cellul…	GO:0043229,intracellular organelle|GO:0043228,non-membrane-bounded organelle|GO:0005874,microtubule|GO:0043226,organelle|GO:0005856,cytoskeleton|GO:0031982,vesicle|GO:0043209,myelin sheath|GO:0043227,membrane-bounded organelle|GO:0031988,membrane-bounded vesicle|GO:0044430,cytoskeletal part|GO:0005737,cytoplasm|GO:0015630,microtubule cytoskeleton|GO:0005881,cytoplasmic microtubule|GO:0032991,macr…	GO:0005200,structural constituent of cytoskeleton|GO:0044389,ubiquitin-like protein ligase binding|GO:0035639,purine ribonucleoside triphosphate binding|GO:0019899,enzyme binding|GO:0005488,binding|GO:0003676,nucleic acid binding|GO:0000166,nucleotide binding|GO:1901363,heterocyclic compound binding|GO:0001883,purine nucleoside binding|GO:0001882,nucleoside binding|GO:0043168,anion binding|GO:001…	hsa05130,Pathogenic Escherichia coli infection|hsa04145,Phagosome|hsa04540,Gap junction	http://www.uniprot.org/uniprot/P68363
P68366	3.88678	1.95857	P68366	TUBA4A	GO:0022607,cellular component assembly|GO:0007599,hemostasis|GO:0044839,cell cycle G2/M phase transition|GO:0070271,protein complex biogenesis|GO:0000086,G2/M transition of mitotic cell cycle|GO:0044699,single-organism process|GO:0007596,blood coagulation|GO:1903047,mitotic cell cycle process|GO:0044770,cell cycle phase transition|GO:0032940,secretion by cell|GO:0022402,cell cycle process|GO:0051…	GO:0043229,intracellular organelle|GO:0043228,non-membrane-bounded organelle|GO:0005874,microtubule|GO:0043226,organelle|GO:0005856,cytoskeleton|GO:0031982,vesicle|GO:0043227,membrane-bounded organelle|GO:0031988,membrane-bounded vesicle|GO:0044430,cytoskeletal part|GO:0005737,cytoplasm|GO:0015630,microtubule cytoskeleton|GO:0032991,macromolecular complex|GO:1903561,extracellular vesicle|GO:00700…	GO:0005200,structural constituent of cytoskeleton|GO:0035639,purine ribonucleoside triphosphate binding|GO:0005488,binding|GO:0005198,structural molecule activity|GO:1901363,heterocyclic compound binding|GO:1901265,nucleoside phosphate binding|GO:0001882,nucleoside binding|GO:0043168,anion binding|GO:0016462,pyrophosphatase activity|GO:0000166,nucleotide binding|GO:0032561,guanyl ribonucleotide b…	hsa05130,Pathogenic Escherichia coli infection|hsa04145,Phagosome|hsa04540,Gap junction	http://www.uniprot.org/uniprot/P68366
Q9BQE3	4.0846	2.03019	Q9BQE3	TUBA1C	GO:0022607,cellular component assembly|GO:0006457,protein folding|GO:0070271,protein complex biogenesis|GO:0043933,macromolecular complex subunit organization|GO:0006458,'de novo' protein folding|GO:0051301,cell division|GO:0034622,cellular macromolecular complex assembly|GO:0044699,single-organism process|GO:0044267,cellular protein metabolic process|GO:0071822,protein complex subunit organizati…	GO:0043229,intracellular organelle|GO:0043228,non-membrane-bounded organelle|GO:0043227,membrane-bounded organelle|GO:0043226,organelle|GO:0005856,cytoskeleton|GO:0031982,vesicle|GO:0005874,microtubule|GO:0005634,nucleus|GO:0044430,cytoskeletal part|GO:0005737,cytoplasm|GO:0015630,microtubule cytoskeleton|GO:0005881,cytoplasmic microtubule|GO:0043234,protein complex|GO:0032991,macromolecular comp…	GO:0005200,structural constituent of cytoskeleton|GO:0035639,purine ribonucleoside triphosphate binding|GO:0005488,binding|GO:0005198,structural molecule activity|GO:1901363,heterocyclic compound binding|GO:1901265,nucleoside phosphate binding|GO:0001882,nucleoside binding|GO:0043168,anion binding|GO:0016462,pyrophosphatase activity|GO:0000166,nucleotide binding|GO:0032561,guanyl ribonucleotide b…	hsa05130,Pathogenic Escherichia coli infection|hsa04145,Phagosome|hsa04540,Gap junction	http://www.uniprot.org/uniprot/Q9BQE3
P04745	44.2453	5.46745	P04745	AMY1A	GO:0044238,primary metabolic process|GO:0032501,multicellular organismal process|GO:0005975,carbohydrate metabolic process|GO:0044707,single-multicellular organism process|GO:0007586,digestion|GO:0071704,organic substance metabolic process|GO:0008152,metabolic process|GO:0044699,single-organism process	GO:0043230,extracellular organelle|GO:0031982,vesicle|GO:0044421,extracellular region part|GO:0043227,membrane-bounded organelle|GO:0031988,membrane-bounded vesicle|GO:0005576,extracellular region|GO:0005615,extracellular space|GO:1903561,extracellular vesicle|GO:0065010,extracellular membrane-bounded organelle|GO:0043226,organelle|GO:0070062,extracellular exosome	GO:0016787,hydrolase activity|GO:0043169,cation binding|GO:0016160,amylase activity|GO:0016798,hydrolase activity, acting on glycosyl bonds|GO:0043167,ion binding|GO:0003824,catalytic activity|GO:0004556,alpha-amylase activity|GO:0005488,binding|GO:0005515,protein binding|GO:0004553,hydrolase activity, hydrolyzing O-glycosyl compounds|GO:0046872,metal ion binding	hsa04970,Salivary secretion|hsa01100,Metabolic pathways|hsa04973,Carbohydrate digestion and absorption|hsa00500,Starch and sucrose metabolism	http://www.uniprot.org/uniprot/P04745

## Sheet: C-B
ID	FoldChange	Log2FoldChange	Uniprot	Genename	Biological Process	Cell Component	Molecular Function	KEGG Pathways	UNIPROT_URL
Q0JRZ9	0.33195	-1.59096	Q0JRZ9	FCHO2	GO:0022607,cellular component assembly|GO:0070271,protein complex biogenesis|GO:0043933,macromolecular complex subunit organization|GO:0006901,vesicle coating|GO:0006900,membrane budding|GO:0061024,membrane organization|GO:0048268,clathrin coat assembly|GO:0008104,protein localization|GO:0016050,vesicle organization|GO:0034622,cellular macromolecular complex assembly|GO:1990778,protein localizati…	GO:0030135,coated vesicle|GO:0043229,intracellular organelle|GO:0071944,cell periphery|GO:0005905,coated pit|GO:0043227,membrane-bounded organelle|GO:0043226,organelle|GO:0030136,clathrin-coated vesicle|GO:0005737,cytoplasm|GO:0031982,vesicle|GO:0016023,cytoplasmic membrane-bounded vesicle|GO:0031410,cytoplasmic vesicle|GO:0098805,whole membrane|GO:0016020,membrane|GO:0031988,membrane-bounded ves…	GO:0043168,anion binding|GO:0036094,small molecule binding|GO:0072341,modified amino acid binding|GO:0035091,phosphatidylinositol binding|GO:0016597,amino acid binding|GO:0005543,phospholipid binding|GO:0031406,carboxylic acid binding|GO:0008289,lipid binding|GO:0005546,phosphatidylinositol-4,5-bisphosphate binding|GO:0043167,ion binding|GO:1902936,phosphatidylinositol bisphosphate binding|GO:004…		http://www.uniprot.org/uniprot/Q0JRZ9
P37802	0.5601	-0.836244	P37802	TAGLN2	GO:0032502,developmental process|GO:0060429,epithelium development|GO:0048869,cellular developmental process|GO:0030154,cell differentiation|GO:0009888,tissue development|GO:0044767,single-organism developmental process|GO:0044763,single-organism cellular process|GO:0030855,epithelial cell differentiation|GO:0009987,cellular process|GO:0044699,single-organism process|GO:0048856,anatomical structu…	GO:0043230,extracellular organelle|GO:0031982,vesicle|GO:0044421,extracellular region part|GO:0043227,membrane-bounded organelle|GO:0031988,membrane-bounded vesicle|GO:0005576,extracellular region|GO:1903561,extracellular vesicle|GO:0065010,extracellular membrane-bounded organelle|GO:0043226,organelle|GO:0070062,extracellular exosome	GO:0008092,cytoskeletal protein binding|GO:0051015,actin filament binding|GO:0003779,actin binding|GO:0044877,macromolecular complex binding|GO:0005488,binding|GO:0005515,protein binding|GO:0032403,protein complex binding		http://www.uniprot.org/uniprot/P37802
Q9BYB0	0.6185	-0.693154	Q9BYB0	SHANK3	GO:0044238,primary metabolic process|GO:0010975,regulation of neuron projection development|GO:0051049,regulation of transport|GO:0048584,positive regulation of response to stimulus|GO:0007612,learning|GO:0007613,memory|GO:0007610,behavior|GO:0007611,learning or memory|GO:0061024,membrane organization|GO:0060322,head development|GO:0007165,signal transduction|GO:0007166,cell surface receptor sign…	GO:0098590,plasma membrane region|GO:0060170,ciliary membrane|GO:0030425,dendrite|GO:0071944,cell periphery|GO:0045202,synapse|GO:0005929,cilium|GO:0043227,membrane-bounded organelle|GO:0043226,organelle|GO:0030054,cell junction|GO:0097060,synaptic membrane|GO:0031090,organelle membrane|GO:0098805,whole membrane|GO:0016020,membrane|GO:0044309,neuron spine|GO:0097458,neuron part|GO:0044456,synapse…	GO:0008022,protein C-terminus binding|GO:0030159,receptor signaling complex scaffold activity|GO:0017124,SH3 domain binding|GO:0005488,binding|GO:0043167,ion binding|GO:0043169,cation binding|GO:0046914,transition metal ion binding|GO:0005198,structural molecule activity|GO:0003779,actin binding|GO:0046872,metal ion binding|GO:0042802,identical protein binding|GO:0035255,ionotropic glutamate rece…	hsa04724,Glutamatergic synapse	http://www.uniprot.org/uniprot/Q9BYB0
O75122	0.646225	-0.629892	O75122	CLASP2	GO:0031110,regulation of microtubule polymerization or depolymerization|GO:0031111,negative regulation of microtubule polymerization or depolymerization|GO:0043933,macromolecular complex subunit organization|GO:2000736,regulation of stem cell differentiation|GO:0045216,cell-cell junction organization|GO:0051046,regulation of secretion|GO:0051047,positive regulation of secretion|GO:0051049,regulat…	GO:0098590,plasma membrane region|GO:0042995,cell projection|GO:0005828,kinetochore microtubule|GO:0043229,intracellular organelle|GO:0043228,non-membrane-bounded organelle|GO:0005924,cell-substrate adherens junction|GO:0005925,focal adhesion|GO:0005874,microtubule|GO:0043226,organelle|GO:0005876,spindle microtubule|GO:0030055,cell-substrate junction|GO:0005856,cytoskeleton|GO:0098589,membrane re…	GO:0008107,galactoside 2-alpha-L-fucosyltransferase activity|GO:0001948,glycoprotein binding|GO:0015631,tubulin binding|GO:0005515,protein binding|GO:0008092,cytoskeletal protein binding|GO:0097367,carbohydrate derivative binding|GO:0031127,alpha-(1,2)-fucosyltransferase activity|GO:0051010,microtubule plus-end binding|GO:0008417,fucosyltransferase activity|GO:0003824,catalytic activity|GO:001674…		http://www.uniprot.org/uniprot/O75122
Q96B97	1.5064	0.591105	Q96B97	SH3KBP1	GO:0022604,regulation of cell morphogenesis|GO:0032502,developmental process|GO:0051234,establishment of localization|GO:0022603,regulation of anatomical structure morphogenesis|GO:0048585,negative regulation of response to stimulus|GO:0007167,enzyme linked receptor protein signaling pathway|GO:0048583,regulation of response to stimulus|GO:0042059,negative regulation of epidermal growth factor re…	GO:0005911,cell-cell junction|GO:0043229,intracellular organelle|GO:0043228,non-membrane-bounded organelle|GO:0045202,synapse|GO:0005924,cell-substrate adherens junction|GO:0005925,focal adhesion|GO:0043227,membrane-bounded organelle|GO:0043226,organelle|GO:0030054,cell junction|GO:0030055,cell-substrate junction|GO:0005856,cytoskeleton|GO:0031982,vesicle|GO:0016023,cytoplasmic membrane-bounded v…	GO:0005488,binding|GO:0017124,SH3 domain binding|GO:0005515,protein binding|GO:0019904,protein domain specific binding	hsa04144,Endocytosis	http://www.uniprot.org/uniprot/Q96B97
P21291	1.51517	0.599484	P21291	CSRP1	GO:0016337,single organismal cell-cell adhesion|GO:0007596,blood coagulation|GO:0032501,multicellular organismal process|GO:0007599,hemostasis|GO:0044699,single-organism process|GO:0009611,response to wounding|GO:0065007,biological regulation|GO:0065008,regulation of biological quality|GO:0098602,single organism cell adhesion|GO:0050878,regulation of body fluid levels|GO:0098609,cell-cell adhesio…	GO:0043229,intracellular organelle|GO:0005924,cell-substrate adherens junction|GO:0005925,focal adhesion|GO:0043227,membrane-bounded organelle|GO:0043226,organelle|GO:0030054,cell junction|GO:0030055,cell-substrate junction|GO:0031982,vesicle|GO:0005634,nucleus|GO:0031988,membrane-bounded vesicle|GO:0070161,anchoring junction|GO:0005912,adherens junction|GO:1903561,extracellular vesicle|GO:007006…	GO:0005488,binding|GO:0043169,cation binding|GO:0046914,transition metal ion binding|GO:0097159,organic cyclic compound binding|GO:0044822,poly(A) RNA binding|GO:0043167,ion binding|GO:0008270,zinc ion binding|GO:0003676,nucleic acid binding|GO:0046872,metal ion binding|GO:1901363,heterocyclic compound binding|GO:0003723,RNA binding		http://www.uniprot.org/uniprot/P21291
P52333	1.5165	0.600745	P52333	JAK3	GO:0051169,nuclear transport|GO:0035771,interleukin-4-mediated signaling pathway|GO:0051049,regulation of transport|GO:0002704,negative regulation of leukocyte mediated immunity|GO:0002703,regulation of leukocyte mediated immunity|GO:0002701,negative regulation of production of molecular mediator of immune response|GO:0002700,regulation of production of molecular mediator of immune response|GO:00…	GO:0019897,extrinsic component of plasma membrane|GO:0009898,cytoplasmic side of plasma membrane|GO:0019898,extrinsic component of membrane|GO:0043229,intracellular organelle|GO:0071944,cell periphery|GO:0098552,side of membrane|GO:0043226,organelle|GO:0005856,cytoskeleton|GO:0016020,membrane|GO:0044459,plasma membrane part|GO:0005737,cytoplasm|GO:0098562,cytoplasmic side of membrane|GO:0012505,e…	GO:0035639,purine ribonucleoside triphosphate binding|GO:0019899,enzyme binding|GO:0004672,protein kinase activity|GO:0043167,ion binding|GO:1901363,heterocyclic compound binding|GO:0001883,purine nucleoside binding|GO:0001882,nucleoside binding|GO:0043168,anion binding|GO:0000166,nucleotide binding|GO:0016740,transferase activity|GO:0004715,non-membrane spanning protein tyrosine kinase activity|…	hsa04550,Signaling pathways regulating pluripotency of stem cells|hsa05203,Viral carcinogenesis|hsa04630,Jak-STAT signaling pathway|hsa05169,Epstein-Barr virus infection|hsa05340,Primary immunodeficiency|hsa05166,HTLV-I infection|hsa04062,Chemokine signaling pathway|hsa05162,Measles|hsa04151,PI3K-Akt signaling pathway	http://www.uniprot.org/uniprot/P52333
Q9UBC2	1.57422	0.654642	Q9UBC2	EPS15L1	GO:0048585,negative regulation of response to stimulus|GO:0007167,enzyme linked receptor protein signaling pathway|GO:0048583,regulation of response to stimulus|GO:0042059,negative regulation of epidermal growth factor receptor signaling pathway|GO:0042058,regulation of epidermal growth factor receptor signaling pathway|GO:0023057,negative regulation of signaling|GO:0023052,signaling|GO:0010648,n…	GO:0043229,intracellular organelle|GO:0071944,cell periphery|GO:0030117,membrane coat|GO:0005905,coated pit|GO:0030118,clathrin coat|GO:0043227,membrane-bounded organelle|GO:0043226,organelle|GO:0005737,cytoplasm|GO:0030132,clathrin coat of coated pit|GO:0005634,nucleus|GO:0016020,membrane|GO:0044459,plasma membrane part|GO:0048475,coated membrane|GO:0098589,membrane region|GO:0012505,endomembran…	GO:0043169,cation binding|GO:0043167,ion binding|GO:0005488,binding|GO:0005515,protein binding|GO:0046872,metal ion binding|GO:0005509,calcium ion binding	hsa04144,Endocytosis	http://www.uniprot.org/uniprot/Q9UBC2
Q13546	1.62895	0.703942	Q13546	RIPK1	GO:0030225,macrophage differentiation|GO:0051049,regulation of transport|GO:0051716,cellular response to stimulus|GO:0000165,MAPK cascade|GO:0060545,positive regulation of necroptotic process|GO:0060544,regulation of necroptotic process|GO:0048583,regulation of response to stimulus|GO:0045859,regulation of protein kinase activity|GO:0051291,protein heterooligomerization|GO:0046330,positive regula…	GO:0031264,death-inducing signaling complex|GO:0071944,cell periphery|GO:0043227,membrane-bounded organelle|GO:0043226,organelle|GO:0005737,cytoplasm|GO:0098805,whole membrane|GO:0016020,membrane|GO:0005739,mitochondrion|GO:0044459,plasma membrane part|GO:1902494,catalytic complex|GO:0098589,membrane region|GO:0005886,plasma membrane|GO:0043234,protein complex|GO:0043235,receptor complex|GO:00329…	GO:0005126,cytokine receptor binding|GO:0044389,ubiquitin-like protein ligase binding|GO:0005123,death receptor binding|GO:0035639,purine ribonucleoside triphosphate binding|GO:0019899,enzyme binding|GO:0044877,macromolecular complex binding|GO:0004672,protein kinase activity|GO:0043167,ion binding|GO:1901363,heterocyclic compound binding|GO:0001883,purine nucleoside binding|GO:0001882,nucleoside…	hsa04620,Toll-like receptor signaling pathway|hsa04622,RIG-I-like receptor signaling pathway|hsa04623,Cytosolic DNA-sensing pathway|hsa05169,Epstein-Barr virus infection|hsa04668,TNF signaling pathway|hsa04210,Apoptosis|hsa04064,NF-kappa B signaling pathway|hsa05160,Hepatitis C	http://www.uniprot.org/uniprot/Q13546
Q05682	1.63742	0.711429	Q05682	CALD1	GO:0032501,multicellular organismal process|GO:0006936,muscle contraction|GO:0044707,single-multicellular organism process|GO:0009987,cellular process|GO:0006928,movement of cell or subcellular component|GO:0003012,muscle system process|GO:0044763,single-organism cellular process|GO:0044699,single-organism process|GO:0003008,system process	GO:0015629,actin cytoskeleton|GO:0030016,myofibril|GO:0043229,intracellular organelle|GO:0043228,non-membrane-bounded organelle|GO:0005622,intracellular|GO:0043226,organelle|GO:0005856,cytoskeleton|GO:0016020,membrane|GO:0044430,cytoskeletal part|GO:0005737,cytoplasm|GO:0030478,actin cap|GO:0044424,intracellular part|GO:0005938,cell cortex|GO:0005886,plasma membrane|GO:0043232,intracellular non-m…	GO:0008092,cytoskeletal protein binding|GO:0017022,myosin binding|GO:0003779,actin binding|GO:0005516,calmodulin binding|GO:0005515,protein binding|GO:0005523,tropomyosin binding|GO:0005488,binding	hsa04270,Vascular smooth muscle contraction	http://www.uniprot.org/uniprot/Q05682
O75116	1.64793	0.720651	O75116	ROCK2	GO:0043933,macromolecular complex subunit organization|GO:0019220,regulation of phosphate metabolic process|GO:0080090,regulation of primary metabolic process|GO:0019222,regulation of metabolic process|GO:0060429,epithelium development|GO:0048468,cell development|GO:0016358,dendrite development|GO:0007160,cell-matrix adhesion|GO:0072359,circulatory system development|GO:0072358,cardiovascular sys…	GO:0035770,ribonucleoprotein granule|GO:0043229,intracellular organelle|GO:0043228,non-membrane-bounded organelle|GO:0036464,cytoplasmic ribonucleoprotein granule|GO:0031616,spindle pole centrosome|GO:0005815,microtubule organizing center|GO:0043227,membrane-bounded organelle|GO:0043226,organelle|GO:0005856,cytoskeleton|GO:0000922,spindle pole|GO:0005819,spindle|GO:0005813,centrosome|GO:0005634,n…	GO:0035639,purine ribonucleoside triphosphate binding|GO:0017048,Rho GTPase binding|GO:0031267,small GTPase binding|GO:0051020,GTPase binding|GO:0004672,protein kinase activity|GO:0003676,nucleic acid binding|GO:0000166,nucleotide binding|GO:1901363,heterocyclic compound binding|GO:0001883,purine nucleoside binding|GO:0001882,nucleoside binding|GO:0043168,anion binding|GO:0043169,cation binding|G…	hsa05132,Salmonella infection|hsa05131,Shigellosis|hsa05130,Pathogenic Escherichia coli infection|hsa04611,Platelet activation|hsa04022,cGMP-PKG signaling pathway|hsa04062,Chemokine signaling pathway|hsa05200,Pathways in cancer|hsa04024,cAMP signaling pathway|hsa04071,Sphingolipid signaling pathway|hsa05205,Proteoglycans in cancer|hsa04670,Leukocyte transendothelial migration|hsa04510,Focal adhes…	http://www.uniprot.org/uniprot/O75116
Q96EV8	1.72695	0.788226	Q96EV8	DTNBP1	GO:0019220,regulation of phosphate metabolic process|GO:0080090,regulation of primary metabolic process|GO:0019222,regulation of metabolic process|GO:0051047,positive regulation of secretion|GO:0051049,regulation of transport|GO:0032438,melanosome organization|GO:0007596,blood coagulation|GO:0048583,regulation of response to stimulus|GO:0015872,dopamine transport|GO:0061024,membrane organization|…	GO:0008021,synaptic vesicle|GO:0005783,endoplasmic reticulum|GO:0098590,plasma membrane region|GO:0044464,cell part|GO:0048770,pigment granule|GO:0030426,growth cone|GO:0030425,dendrite|GO:0005789,endoplasmic reticulum membrane|GO:0042175,nuclear outer membrane-endoplasmic reticulum membrane network|GO:0043229,intracellular organelle|GO:0071944,cell periphery|GO:0045202,synapse|GO:0032991,macromo…	GO:0005488,binding|GO:0005515,protein binding		http://www.uniprot.org/uniprot/Q96EV8
Q99501	1.7283	0.789354	Q99501	GAS2L1	GO:0031110,regulation of microtubule polymerization or depolymerization|GO:0031111,negative regulation of microtubule polymerization or depolymerization|GO:0031114,regulation of microtubule depolymerization|GO:0019222,regulation of metabolic process|GO:0032870,cellular response to hormone stimulus|GO:0032845,negative regulation of homeostatic process|GO:0032844,regulation of homeostatic process|G…	GO:0032432,actin filament bundle|GO:0015629,actin cytoskeleton|GO:0043229,intracellular organelle|GO:0043228,non-membrane-bounded organelle|GO:0005874,microtubule|GO:0043226,organelle|GO:0042641,actomyosin|GO:0005856,cytoskeleton|GO:0001725,stress fiber|GO:0044430,cytoskeletal part|GO:0005737,cytoplasm|GO:0015630,microtubule cytoskeleton|GO:0043234,protein complex|GO:0032991,macromolecular comple…	GO:0030674,protein binding, bridging|GO:0008093,cytoskeletal adaptor activity|GO:0008092,cytoskeletal protein binding|GO:0008017,microtubule binding|GO:0035257,nuclear hormone receptor binding|GO:0015631,tubulin binding|GO:0046966,thyroid hormone receptor binding|GO:0044877,macromolecular complex binding|GO:0005488,binding|GO:0005515,protein binding|GO:0032403,protein complex binding|GO:0051427,h…		http://www.uniprot.org/uniprot/Q99501
Q9H4A6	1.9094	0.933119	Q9H4A6	GOLPH3	GO:0008104,protein localization|GO:0051046,regulation of secretion|GO:0051047,positive regulation of secretion|GO:0051049,regulation of transport|GO:0048584,positive regulation of response to stimulus|GO:0048583,regulation of response to stimulus|GO:0006900,membrane budding|GO:0061024,membrane organization|GO:0007009,plasma membrane organization|GO:0007163,establishment or maintenance of cell pol…	GO:0031970,organelle envelope lumen|GO:0031974,membrane-enclosed lumen|GO:0031975,envelope|GO:0043229,intracellular organelle|GO:0071944,cell periphery|GO:0005622,intracellular|GO:0043227,membrane-bounded organelle|GO:0043226,organelle|GO:0005737,cytoplasm|GO:0031985,Golgi cisterna|GO:0031984,organelle subcompartment|GO:0031090,organelle membrane|GO:0031981,nuclear lumen|GO:0005634,nucleus|GO:001…	GO:0043168,anion binding|GO:0070273,phosphatidylinositol-4-phosphate binding|GO:0035091,phosphatidylinositol binding|GO:0005543,phospholipid binding|GO:0008289,lipid binding|GO:0019899,enzyme binding|GO:0043167,ion binding|GO:0005488,binding|GO:0005515,protein binding|GO:1901981,phosphatidylinositol phosphate binding	hsa05202,Transcriptional misregulation in cancer	http://www.uniprot.org/uniprot/Q9H4A6
Q9H939	1.93495	0.952296	Q9H939	PSTPIP2	GO:0006996,organelle organization|GO:0040011,locomotion|GO:0007010,cytoskeleton organization|GO:0048870,cell motility|GO:0009987,cellular process|GO:0016043,cellular component organization|GO:0006928,movement of cell or subcellular component|GO:0051674,localization of cell|GO:0044763,single-organism cellular process|GO:0071840,cellular component organization or biogenesis|GO:0016477,cell migratio…	GO:0005856,cytoskeleton|GO:0005737,cytoplasm|GO:0043232,intracellular non-membrane-bounded organelle|GO:0005829,cytosol|GO:0016020,membrane|GO:0044464,cell part|GO:0044444,cytoplasmic part|GO:0005623,cell|GO:0005622,intracellular|GO:0043229,intracellular organelle|GO:0043228,non-membrane-bounded organelle|GO:0044424,intracellular part|GO:0043226,organelle	GO:0003779,actin binding|GO:0005488,binding|GO:0005515,protein binding|GO:0008092,cytoskeletal protein binding		http://www.uniprot.org/uniprot/Q9H939
Q9H4B7	2.45295	1.29452	Q9H4B7	TUBB1	GO:0022607,cellular component assembly|GO:0006457,protein folding|GO:0070271,protein complex biogenesis|GO:0043933,macromolecular complex subunit organization|GO:0006458,'de novo' protein folding|GO:0000226,microtubule cytoskeleton organization|GO:0034622,cellular macromolecular complex assembly|GO:0051225,spindle assembly|GO:0044699,single-organism process|GO:0044267,cellular protein metabolic p…	GO:0043229,intracellular organelle|GO:0043228,non-membrane-bounded organelle|GO:0005874,microtubule|GO:0043226,organelle|GO:0005856,cytoskeleton|GO:0031982,vesicle|GO:0043227,membrane-bounded organelle|GO:0031988,membrane-bounded vesicle|GO:0044430,cytoskeletal part|GO:0005737,cytoplasm|GO:0015630,microtubule cytoskeleton|GO:0032991,macromolecular complex|GO:1903561,extracellular vesicle|GO:00700…	GO:0005200,structural constituent of cytoskeleton|GO:0035639,purine ribonucleoside triphosphate binding|GO:0005488,binding|GO:0005198,structural molecule activity|GO:1901363,heterocyclic compound binding|GO:1901265,nucleoside phosphate binding|GO:0001882,nucleoside binding|GO:0043168,anion binding|GO:0016462,pyrophosphatase activity|GO:0000166,nucleotide binding|GO:0032561,guanyl ribonucleotide b…	hsa05130,Pathogenic Escherichia coli infection|hsa04145,Phagosome|hsa04540,Gap junction	http://www.uniprot.org/uniprot/Q9H4B7
P07437	2.45525	1.29587	P07437	TUBB	GO:0022607,cellular component assembly|GO:0044839,cell cycle G2/M phase transition|GO:0070271,protein complex biogenesis|GO:0000086,G2/M transition of mitotic cell cycle|GO:0006955,immune response|GO:1903047,mitotic cell cycle process|GO:0006928,movement of cell or subcellular component|GO:0044770,cell cycle phase transition|GO:0044772,mitotic cell cycle phase transition|GO:0022402,cell cycle pro…	GO:0035770,ribonucleoprotein granule|GO:0044421,extracellular region part|GO:0031970,organelle envelope lumen|GO:0031974,membrane-enclosed lumen|GO:0031975,envelope|GO:0043229,intracellular organelle|GO:0043228,non-membrane-bounded organelle|GO:0036464,cytoplasmic ribonucleoprotein granule|GO:0030529,ribonucleoprotein complex|GO:0005874,microtubule|GO:0043226,organelle|GO:0005856,cytoskeleton|GO:…	GO:0005200,structural constituent of cytoskeleton|GO:0044389,ubiquitin-like protein ligase binding|GO:0035639,purine ribonucleoside triphosphate binding|GO:0032794,GTPase activating protein binding|GO:0019899,enzyme binding|GO:0044877,macromolecular complex binding|GO:0005488,binding|GO:0000166,nucleotide binding|GO:1901363,heterocyclic compound binding|GO:0001883,purine nucleoside binding|GO:000…	hsa05130,Pathogenic Escherichia coli infection|hsa04145,Phagosome|hsa04540,Gap junction	http://www.uniprot.org/uniprot/P07437
P68363	2.69123	1.42826	P68363	TUBA1B	GO:0022607,cellular component assembly|GO:0006457,protein folding|GO:0070271,protein complex biogenesis|GO:0043933,macromolecular complex subunit organization|GO:0006458,'de novo' protein folding|GO:0000226,microtubule cytoskeleton organization|GO:0070887,cellular response to chemical stimulus|GO:0034622,cellular macromolecular complex assembly|GO:0044699,single-organism process|GO:0044267,cellul…	GO:0043229,intracellular organelle|GO:0043228,non-membrane-bounded organelle|GO:0005874,microtubule|GO:0043226,organelle|GO:0005856,cytoskeleton|GO:0031982,vesicle|GO:0043209,myelin sheath|GO:0043227,membrane-bounded organelle|GO:0031988,membrane-bounded vesicle|GO:0044430,cytoskeletal part|GO:0005737,cytoplasm|GO:0015630,microtubule cytoskeleton|GO:0005881,cytoplasmic microtubule|GO:0032991,macr…	GO:0005200,structural constituent of cytoskeleton|GO:0044389,ubiquitin-like protein ligase binding|GO:0035639,purine ribonucleoside triphosphate binding|GO:0019899,enzyme binding|GO:0005488,binding|GO:0003676,nucleic acid binding|GO:0000166,nucleotide binding|GO:1901363,heterocyclic compound binding|GO:0001883,purine nucleoside binding|GO:0001882,nucleoside binding|GO:0043168,anion binding|GO:001…	hsa05130,Pathogenic Escherichia coli infection|hsa04145,Phagosome|hsa04540,Gap junction	http://www.uniprot.org/uniprot/P68363
P68366	3.30152	1.72313	P68366	TUBA4A	GO:0022607,cellular component assembly|GO:0007599,hemostasis|GO:0044839,cell cycle G2/M phase transition|GO:0070271,protein complex biogenesis|GO:0000086,G2/M transition of mitotic cell cycle|GO:0044699,single-organism process|GO:0007596,blood coagulation|GO:1903047,mitotic cell cycle process|GO:0044770,cell cycle phase transition|GO:0032940,secretion by cell|GO:0022402,cell cycle process|GO:0051…	GO:0043229,intracellular organelle|GO:0043228,non-membrane-bounded organelle|GO:0005874,microtubule|GO:0043226,organelle|GO:0005856,cytoskeleton|GO:0031982,vesicle|GO:0043227,membrane-bounded organelle|GO:0031988,membrane-bounded vesicle|GO:0044430,cytoskeletal part|GO:0005737,cytoplasm|GO:0015630,microtubule cytoskeleton|GO:0032991,macromolecular complex|GO:1903561,extracellular vesicle|GO:00700…	GO:0005200,structural constituent of cytoskeleton|GO:0035639,purine ribonucleoside triphosphate binding|GO:0005488,binding|GO:0005198,structural molecule activity|GO:1901363,heterocyclic compound binding|GO:1901265,nucleoside phosphate binding|GO:0001882,nucleoside binding|GO:0043168,anion binding|GO:0016462,pyrophosphatase activity|GO:0000166,nucleotide binding|GO:0032561,guanyl ribonucleotide b…	hsa05130,Pathogenic Escherichia coli infection|hsa04145,Phagosome|hsa04540,Gap junction	http://www.uniprot.org/uniprot/P68366
Q9BQE3	3.3467	1.74274	Q9BQE3	TUBA1C	GO:0022607,cellular component assembly|GO:0006457,protein folding|GO:0070271,protein complex biogenesis|GO:0043933,macromolecular complex subunit organization|GO:0006458,'de novo' protein folding|GO:0051301,cell division|GO:0034622,cellular macromolecular complex assembly|GO:0044699,single-organism process|GO:0044267,cellular protein metabolic process|GO:0071822,protein complex subunit organizati…	GO:0043229,intracellular organelle|GO:0043228,non-membrane-bounded organelle|GO:0043227,membrane-bounded organelle|GO:0043226,organelle|GO:0005856,cytoskeleton|GO:0031982,vesicle|GO:0005874,microtubule|GO:0005634,nucleus|GO:0044430,cytoskeletal part|GO:0005737,cytoplasm|GO:0015630,microtubule cytoskeleton|GO:0005881,cytoplasmic microtubule|GO:0043234,protein complex|GO:0032991,macromolecular comp…	GO:0005200,structural constituent of cytoskeleton|GO:0035639,purine ribonucleoside triphosphate binding|GO:0005488,binding|GO:0005198,structural molecule activity|GO:1901363,heterocyclic compound binding|GO:1901265,nucleoside phosphate binding|GO:0001882,nucleoside binding|GO:0043168,anion binding|GO:0016462,pyrophosphatase activity|GO:0000166,nucleotide binding|GO:0032561,guanyl ribonucleotide b…	hsa05130,Pathogenic Escherichia coli infection|hsa04145,Phagosome|hsa04540,Gap junction	http://www.uniprot.org/uniprot/Q9BQE3
P04745	72.0294	6.17051	P04745	AMY1A	GO:0044238,primary metabolic process|GO:0032501,multicellular organismal process|GO:0005975,carbohydrate metabolic process|GO:0044707,single-multicellular organism process|GO:0007586,digestion|GO:0071704,organic substance metabolic process|GO:0008152,metabolic process|GO:0044699,single-organism process	GO:0043230,extracellular organelle|GO:0031982,vesicle|GO:0044421,extracellular region part|GO:0043227,membrane-bounded organelle|GO:0031988,membrane-bounded vesicle|GO:0005576,extracellular region|GO:0005615,extracellular space|GO:1903561,extracellular vesicle|GO:0065010,extracellular membrane-bounded organelle|GO:0043226,organelle|GO:0070062,extracellular exosome	GO:0016787,hydrolase activity|GO:0043169,cation binding|GO:0016160,amylase activity|GO:0016798,hydrolase activity, acting on glycosyl bonds|GO:0043167,ion binding|GO:0003824,catalytic activity|GO:0004556,alpha-amylase activity|GO:0005488,binding|GO:0005515,protein binding|GO:0004553,hydrolase activity, hydrolyzing O-glycosyl compounds|GO:0046872,metal ion binding	hsa04970,Salivary secretion|hsa01100,Metabolic pathways|hsa04973,Carbohydrate digestion and absorption|hsa00500,Starch and sucrose metabolism	http://www.uniprot.org/uniprot/P04745
