# Supplementary material
Source: publisher figshare collection journal article supplement (https://tandf.figshare.com/articles/dataset/_/6062987)
Supplement: Supplementary file 1 [file 2 › Exc.5 The detail information of the 13 common differentially expressed proteins caused by storage temperature by Phosphorylation iTRAQ.xls]

## Sheet: Sheet1
NO	ID	FoldChange	Log2FoldChange	Uniprot	Genename	Biological Process	Cell Component	Molecular Function	KEGG Pathways	UNIPROT_URL
1	Q6VY07	1.6161	0.692516	Q6VY07	PACS1	GO:0008104,protein localization|GO:0050688,regulation of defense response to virus|GO:0032101,regulation of response to external stimulus|GO:0034067,protein localization to Golgi apparatus|GO:0050896,response to stimulus|GO:0072661,protein targeting to plasma membrane|GO:0006612,protein targeting to membrane|GO:0048583,regulation of response to stimulus|GO:0072600,establishment of protein localiz…	GO:0030135,coated vesicle|GO:0043229,intracellular organelle|GO:0043227,membrane-bounded organelle|GO:0043226,organelle|GO:0030137,COPI-coated vesicle|GO:0005737,cytoplasm|GO:0031982,vesicle|GO:0016023,cytoplasmic membrane-bounded vesicle|GO:0031410,cytoplasmic vesicle|GO:0031988,membrane-bounded vesicle|GO:0044431,Golgi apparatus part|GO:0048471,perinuclear region of cytoplasm|GO:0005794,Golgi a…	GO:0044325,ion channel binding|GO:0005488,binding|GO:0005515,protein binding	0	http://www.uniprot.org/uniprot/Q6VY07
2	Q15555	2.39447	1.25971	Q15555	MAPRE2	GO:1903047,mitotic cell cycle process|GO:0023052,signaling|GO:0007165,signal transduction|GO:0051301,cell division|GO:0007067,mitotic nuclear division|GO:0050789,regulation of biological process|GO:0044699,single-organism process|GO:0051716,cellular response to stimulus|GO:0000280,nuclear division|GO:0016043,cellular component organization|GO:0065007,biological regulation|GO:0071840,cellular comp…	GO:0005856,cytoskeleton|GO:0043234,protein complex|GO:0015630,microtubule cytoskeleton|GO:0043228,non-membrane-bounded organelle|GO:0005622,intracellular|GO:0043232,intracellular non-membrane-bounded organelle|GO:0035371,microtubule plus-end|GO:0044464,cell part|GO:0005623,cell|GO:0005737,cytoplasm|GO:0044446,intracellular organelle part|GO:0043229,intracellular organelle|GO:0044430,cytoskeletal …	GO:0015631,tubulin binding|GO:0008092,cytoskeletal protein binding|GO:0008017,microtubule binding|GO:0044877,macromolecular complex binding|GO:0005488,binding|GO:0005515,protein binding|GO:0032403,protein complex binding	0	http://www.uniprot.org/uniprot/Q15555
3	Q00013	1.8022	0.849759	Q00013	MPP1	GO:0051716,cellular response to stimulus|GO:0008152,metabolic process|GO:0032101,regulation of response to external stimulus|GO:0016310,phosphorylation|GO:1990266,neutrophil migration|GO:0048583,regulation of response to stimulus|GO:0007610,behavior|GO:0006928,movement of cell or subcellular component|GO:0050900,leukocyte migration|GO:0006807,nitrogen compound metabolic process|GO:1902622,regulat…	GO:0005902,microvillus|GO:0043228,non-membrane-bounded organelle|GO:0005622,intracellular|GO:0031226,intrinsic component of plasma membrane|GO:0043226,organelle|GO:0031224,intrinsic component of membrane|GO:0005856,cytoskeleton|GO:0016021,integral component of membrane|GO:0016020,membrane|GO:0044459,plasma membrane part|GO:0032421,stereocilium bundle|GO:0032420,stereocilium|GO:0005938,cell cortex…	GO:0019201,nucleotide kinase activity|GO:0019205,nucleobase-containing compound kinase activity|GO:0016772,transferase activity, transferring phosphorus-containing groups|GO:0016301,kinase activity|GO:0004385,guanylate kinase activity|GO:0016776,phosphotransferase activity, phosphate group as acceptor|GO:0003824,catalytic activity|GO:0016740,transferase activity|GO:0005488,binding|GO:0005515,prot…	0	http://www.uniprot.org/uniprot/Q00013
4	Q12846	1.6471	0.719928	Q12846	STX4	GO:0035774,positive regulation of insulin secretion involved in cellular response to glucose stimulus|GO:0032024,positive regulation of insulin secretion|GO:2001236,regulation of extrinsic apoptotic signaling pathway|GO:0006887,exocytosis|GO:0007599,hemostasis|GO:0019222,regulation of metabolic process|GO:2001233,regulation of apoptotic signaling pathway|GO:0051049,regulation of transport|GO:0008…	GO:0008021,synaptic vesicle|GO:0042995,cell projection|GO:0043219,lateral loop|GO:0098590,plasma membrane region|GO:0044421,extracellular region part|GO:0030425,dendrite|GO:0043229,intracellular organelle|GO:0071944,cell periphery|GO:0045202,synapse|GO:0031201,SNARE complex|GO:0043227,membrane-bounded organelle|GO:0043226,organelle|GO:0031224,intrinsic component of membrane|GO:0005737,cytoplasm|G…	GO:0005488,binding|GO:0016230,sphingomyelin phosphodiesterase activator activity|GO:0060229,lipase activator activity|GO:0008047,enzyme activator activity|GO:0005515,protein binding|GO:0000149,SNARE binding|GO:0005484,SNAP receptor activity|GO:0098772,molecular function regulator|GO:0030234,enzyme regulator activity|GO:0016004,phospholipase activator activity	hsa04962,Vasopressin-regulated water reabsorption|hsa04130,SNARE interactions in vesicular transport	http://www.uniprot.org/uniprot/Q12846
5	P13861	1.8398	0.879549	P13861	PRKAR2A	GO:0090087,regulation of peptide transport|GO:0043549,regulation of kinase activity|GO:0019220,regulation of phosphate metabolic process|GO:0080090,regulation of primary metabolic process|GO:0019222,regulation of metabolic process|GO:0051049,regulation of transport|GO:0007596,blood coagulation|GO:0032147,activation of protein kinase activity|GO:0008104,protein localization|GO:0003014,renal system…	GO:0098590,plasma membrane region|GO:0044463,cell projection part|GO:0043229,intracellular organelle|GO:0043228,non-membrane-bounded organelle|GO:0005929,cilium|GO:0005924,cell-substrate adherens junction|GO:0005925,focal adhesion|GO:0043227,membrane-bounded organelle|GO:0043226,organelle|GO:0030054,cell junction|GO:0030055,cell-substrate junction|GO:0005856,cytoskeleton|GO:0098589,membrane regio…	GO:0044389,ubiquitin-like protein ligase binding|GO:0019207,kinase regulator activity|GO:0019901,protein kinase binding|GO:0019899,enzyme binding|GO:0036094,small molecule binding|GO:0005488,binding|GO:0004857,enzyme inhibitor activity|GO:0098772,molecular function regulator|GO:1901363,heterocyclic compound binding|GO:1901265,nucleoside phosphate binding|GO:0043168,anion binding|GO:0008603,cAMP-d…	hsa04210,Apoptosis|hsa04910,Insulin signaling pathway	http://www.uniprot.org/uniprot/P13861
6	O75396	1.62522	0.700639	O75396	SEC22B	GO:0009896,positive regulation of catabolic process|GO:0009894,regulation of catabolic process|GO:0008104,protein localization|GO:0080090,regulation of primary metabolic process|GO:0019222,regulation of metabolic process|GO:0033043,regulation of organelle organization|GO:0051128,regulation of cellular component organization|GO:0042176,regulation of protein catabolic process|GO:0051641,cellular lo…	GO:0005783,endoplasmic reticulum|GO:0033116,endoplasmic reticulum-Golgi intermediate compartment membrane|GO:0005789,endoplasmic reticulum membrane|GO:0042175,nuclear outer membrane-endoplasmic reticulum membrane network|GO:0043229,intracellular organelle|GO:0005622,intracellular|GO:0043227,membrane-bounded organelle|GO:0043226,organelle|GO:0031224,intrinsic component of membrane|GO:0005737,cytop…	GO:0000149,SNARE binding|GO:0019905,syntaxin binding|GO:0005488,binding|GO:0005515,protein binding	hsa04145,Phagosome|hsa04130,SNARE interactions in vesicular transport|hsa05134,Legionellosis	http://www.uniprot.org/uniprot/O75396
7	Q16512	2.32362	1.21638	Q16512	PKN1	GO:0006366,transcription from RNA polymerase II promoter|GO:0043549,regulation of kinase activity|GO:0019220,regulation of phosphate metabolic process|GO:0080090,regulation of primary metabolic process|GO:0019222,regulation of metabolic process|GO:0001667,ameboidal-type cell migration|GO:0048584,positive regulation of response to stimulus|GO:0048583,regulation of response to stimulus|GO:0032147,a…	GO:0044464,cell part|GO:0031974,membrane-enclosed lumen|GO:0043229,intracellular organelle|GO:0071944,cell periphery|GO:0097610,cell surface furrow|GO:0043227,membrane-bounded organelle|GO:0043226,organelle|GO:0005737,cytoplasm|GO:0031982,vesicle|GO:0031981,nuclear lumen|GO:0016023,cytoplasmic membrane-bounded vesicle|GO:0031410,cytoplasmic vesicle|GO:0005634,nucleus|GO:0016020,membrane|GO:003198…	GO:0000988,transcription factor activity, protein binding|GO:0042393,histone binding|GO:0035639,purine ribonucleoside triphosphate binding|GO:0005080,protein kinase C binding|GO:0050681,androgen receptor binding|GO:0017048,Rho GTPase binding|GO:0017049,GTP-Rho binding|GO:0031267,small GTPase binding|GO:0051020,GTPase binding|GO:0044877,macromolecular complex binding|GO:0004672,protein kinase acti…	hsa05132,Salmonella infection|hsa04151,PI3K-Akt signaling pathway	http://www.uniprot.org/uniprot/Q16512
8	P53621	1.67992	0.748397	P53621	COPA	GO:0033036,macromolecule localization|GO:0008104,protein localization|GO:0022600,digestive system process|GO:0048200,Golgi transport vesicle coating|GO:0006901,vesicle coating|GO:0048205,COPI coating of Golgi vesicle|GO:0006903,vesicle targeting|GO:0061024,membrane organization|GO:0032941,secretion by tissue|GO:0051641,cellular localization|GO:0051640,organelle localization|GO:0051656,establishme…	GO:0031090,organelle membrane|GO:0043229,intracellular organelle|GO:0030117,membrane coat|GO:0005622,intracellular|GO:0030135,coated vesicle|GO:0043226,organelle|GO:0030137,COPI-coated vesicle|GO:0005737,cytoplasm|GO:0070062,extracellular exosome|GO:0030663,COPI-coated vesicle membrane|GO:0030662,coated vesicle membrane|GO:0016023,cytoplasmic membrane-bounded vesicle|GO:0031410,cytoplasmic vesicl…	GO:0005179,hormone activity|GO:0005198,structural molecule activity|GO:0005488,binding|GO:0005515,protein binding|GO:0005102,receptor binding	0	http://www.uniprot.org/uniprot/P53621
9	P24844	1.7183	0.780982	P24844	MYL9	GO:0050817,coagulation|GO:0006936,muscle contraction|GO:0044707,single-multicellular organism process|GO:0016337,single organismal cell-cell adhesion|GO:0007409,axonogenesis|GO:0030030,cell projection organization|GO:0031175,neuron projection development|GO:0048468,cell development|GO:0006928,movement of cell or subcellular component|GO:0007596,blood coagulation|GO:0003012,muscle system process|G…	GO:0032432,actin filament bundle|GO:0015629,actin cytoskeleton|GO:0030016,myofibril|GO:0030017,sarcomere|GO:0043229,intracellular organelle|GO:0043228,non-membrane-bounded organelle|GO:0044430,cytoskeletal part|GO:0043226,organelle|GO:0030018,Z disc|GO:0042641,actomyosin|GO:0005856,cytoskeleton|GO:0001725,stress fiber|GO:0031674,I band|GO:0005859,muscle myosin complex|GO:0016459,myosin complex|GO…	GO:0032036,myosin heavy chain binding|GO:0043169,cation binding|GO:0005198,structural molecule activity|GO:0008092,cytoskeletal protein binding|GO:0017022,myosin binding|GO:0043167,ion binding|GO:0008307,structural constituent of muscle|GO:0005509,calcium ion binding|GO:0005515,protein binding|GO:0046872,metal ion binding|GO:0005488,binding	hsa04022,cGMP-PKG signaling pathway|hsa04024,cAMP signaling pathway|hsa04530,Tight junction|hsa04670,Leukocyte transendothelial migration|hsa04510,Focal adhesion|hsa04810,Regulation of actin cytoskeleton|hsa04921,Oxytocin signaling pathway|hsa04270,Vascular smooth muscle contraction	http://www.uniprot.org/uniprot/P24844
10	Q13442	1.81268	0.85812	Q13442	PDAP1	GO:0044700,single organism signaling|GO:0051716,cellular response to stimulus|GO:0008283,cell proliferation|GO:0050896,response to stimulus|GO:0009987,cellular process|GO:0044763,single-organism cellular process|GO:0050794,regulation of cellular process|GO:0065007,biological regulation|GO:0023052,signaling|GO:0007165,signal transduction|GO:0007154,cell communication|GO:0050789,regulation of biolo…	0	GO:0097159,organic cyclic compound binding|GO:0044822,poly(A) RNA binding|GO:0005488,binding|GO:0003676,nucleic acid binding|GO:1901363,heterocyclic compound binding|GO:0003723,RNA binding	0	http://www.uniprot.org/uniprot/Q13442
11	P08567	3.07903	1.62247	P08567	PLEK	GO:0043933,macromolecular complex subunit organization|GO:0019220,regulation of phosphate metabolic process|GO:0080090,regulation of primary metabolic process|GO:0019222,regulation of metabolic process|GO:0006904,vesicle docking involved in exocytosis|GO:0048585,negative regulation of response to stimulus|GO:0048584,positive regulation of response to stimulus|GO:0048583,regulation of response to …	GO:0098590,plasma membrane region|GO:0071944,cell periphery|GO:0005737,cytoplasm|GO:0001726,ruffle|GO:0098805,whole membrane|GO:0016020,membrane|GO:0044459,plasma membrane part|GO:0031256,leading edge membrane|GO:0098589,membrane region|GO:0031253,cell projection membrane|GO:0031252,cell leading edge|GO:0005886,plasma membrane|GO:0042995,cell projection|GO:0032587,ruffle membrane|GO:0005829,cytos…	GO:0043168,anion binding|GO:0019901,protein kinase binding|GO:0035091,phosphatidylinositol binding|GO:0005080,protein kinase C binding|GO:0005543,phospholipid binding|GO:0008289,lipid binding|GO:0019899,enzyme binding|GO:0043167,ion binding|GO:1902936,phosphatidylinositol bisphosphate binding|GO:0019900,kinase binding|GO:0043325,phosphatidylinositol-3,4-bisphosphate binding|GO:0005488,binding|GO:…	0	http://www.uniprot.org/uniprot/P08567
12	Q6ZTN6	2.00108	1.00078	Q6ZTN6	ANKRD13D	0	GO:0005737,cytoplasm|GO:0016020,membrane|GO:0043231,intracellular membrane-bounded organelle|GO:0005768,endosome|GO:0005770,late endosome|GO:0044464,cell part|GO:0044444,cytoplasmic part|GO:0005623,cell|GO:0005622,intracellular|GO:0043229,intracellular organelle|GO:0071944,cell periphery|GO:0012505,endomembrane system|GO:0005886,plasma membrane|GO:0044424,intracellular part|GO:0043227,membrane-bo…	0	0	http://www.uniprot.org/uniprot/Q6ZTN6
13	P37802	1.60013	0.678185	P37802	TAGLN2	GO:0032502,developmental process|GO:0060429,epithelium development|GO:0048869,cellular developmental process|GO:0030154,cell differentiation|GO:0009888,tissue development|GO:0044767,single-organism developmental process|GO:0044763,single-organism cellular process|GO:0030855,epithelial cell differentiation|GO:0009987,cellular process|GO:0044699,single-organism process|GO:0048856,anatomical structu…	GO:0043230,extracellular organelle|GO:0031982,vesicle|GO:0044421,extracellular region part|GO:0043227,membrane-bounded organelle|GO:0031988,membrane-bounded vesicle|GO:0005576,extracellular region|GO:1903561,extracellular vesicle|GO:0065010,extracellular membrane-bounded organelle|GO:0043226,organelle|GO:0070062,extracellular exosome	GO:0008092,cytoskeletal protein binding|GO:0051015,actin filament binding|GO:0003779,actin binding|GO:0044877,macromolecular complex binding|GO:0005488,binding|GO:0005515,protein binding|GO:0032403,protein complex binding	0	http://www.uniprot.org/uniprot/P37802
