# Supplementary material
Source: publisher figshare collection journal article supplement (https://tandf.figshare.com/articles/dataset/_/6062987)
Supplement: Supplementary file 1 [file 2 › Supporting Information.docx]

**Supporting Information**

Additional Supporting Information may be found in the online version of this article:

*Supplementary Data*

Exc.1 The detail information of all the differentially expressed proteins between each groups by General iTRAQ

Exc.2 The detail information of the 33 common differentially expressed proteins

caused by storage time by General iTRAQ

Exc.3 The detail information of the 44 common differentially expressed proteins

caused by storage temperature by General iTRAQ

Exc.4 The detail information of all the differentially expressed proteins between each

groups by Phosphorylation iTRAQ

Exc.5 The detail information of the 13 common differentially expressed proteins

caused by storage temperature by Phosphorylation iTRAQ

Tab S1. The 44 common differentially expressed proteins caused by storage

temperature by General iTRAQ

Tab S2. 13 common differentially expressed proteins caused by storage temperature

by Phosphorylation iTRAQ

Fig S1. Hierarchical clustering analysis.

Fig S2. Venn diagram representing the overlap of the differentially expressed proteins.

Fig S3. Bioinformatics analysis of the 44 common differentially expressed proteins

caused by storage temperature by General iTRAQ.

Fig S4. Bioinformatics analysis of the 13 common differentially expressed proteins

caused by storage time by Phosphorylation of iTRAQ.

*Supplemental Methods*
