# Supplementary material
Source: publisher figshare collection journal article supplement (https://tandf.figshare.com/articles/dataset/_/6062987)
Supplement: Supplementary file 1 [file 2 › Supporting Information20180410.pdf]

# 1 Supplementary material

2

Tab S1. The 44 common differentially expressed proteins caused by storage temperature by General iTRAQ.

| NO | Uniprot ID | Genename | Founction                        | Location                     | Log <sub>2</sub> FoldChange |                          |
|----|------------|----------|----------------------------------|------------------------------|-----------------------------|--------------------------|
|    |            |          |                                  |                              | 10°C 5d vs<br>22°C 5d       | -80°C+D 5d vs<br>22°C 5d |
| 1  | O95433     | AHSA1    | protein binding                  | intracellular organelle      | -1.61                       | -0.94                    |
| 2  | O00483     | NDUFA4   | oxidoreductase activity          | organelle membrane           | -1.11                       | -2.62                    |
| 3  | P18136     | P18136   | immunoglobulin receptor binding  | cell periphery               | -0.69                       | 0.73                     |
| 4  | Q9UNF0     | PACIN2   | cytoskeletal protein binding     | plasma membrane region       | -0.67                       | -1.11                    |
| 5  | O00534     | VWA5A    | -                                | intracellular organelle part | -0.60                       | -0.64                    |
| 6  | P25705     | ATP5A1   | protein binding                  | intracellular organelle      | 0.59                        | 0.89                     |
| 7  | P09486     | SPARC    | collagen binding                 | plasma membrane              | 0.63                        | 1.26                     |
| 8  | B2RUZ4     | SMIM1    | - *                              | extracellular organelle      | 0.64                        | 0.65                     |
| 9  | Q9H3K6     | BOLA2    | -                                | extracellular organelle      | 0.68                        | 0.59                     |
| 10 | P10124     | SRGN     | protein binding                  | intracellular organelle      | 0.70                        | 1.08                     |
| 11 | P01009     | SERPINA1 | glycoprotein binding             | endoplasmic reticulum        | 0.72                        | 1.15                     |
| 12 | P02787     | TF       | transferrin receptor binding     | plasma membrane region       | 0.74                        | 1.25                     |
| 13 | P01834     | IGKC     | antigen binding                  | extracellular organelle      | 0.75                        | 1.22                     |
| 14 | P01024     | C3       | protein binding                  | extracellular organelle      | 0.75                        | 0.88                     |
| 15 | P01137     | TGFB1    | -                                | -                            | 0.76                        | 1.06                     |
| 16 | P00751     | CFB      | catalytic activity               | extracellular organelle      | 0.77                        | 2.34                     |
| 17 | O75947     | ATP5H    | hydrolase activity               | intracellular organelle      | 0.80                        | 0.60                     |
| 18 | Q8NEU8     | APPL2    | protein binding                  | extracellular region part    | 0.80                        | 0.98                     |
| 19 | P01859     | IGHG2    | protein binding                  | extracellular organelle      | 0.80                        | 0.75                     |
| 20 | P01857     | IGHG1    | protein binding                  | extracellular organelle      | 0.83                        | 1.19                     |
| 21 | P07225     | PROS1    | protein binding                  | endoplasmic reticulum        | 0.84                        | 0.95                     |
| 22 | Q15388     | TOMM20   | protein transporter activity     | endoplasmic reticulum        | 0.85                        | -1.04                    |
| 23 | P05067     | APP      | peptidase inhibitor activity     | endoplasmic reticulum        | 0.86                        | 1.08                     |
| 24 | P10909     | CLU      | hydrolase activity               | endoplasmic reticulum        | 0.94                        | 1.14                     |
| 25 | P0C0L4     | C4A      | peptidase regulator activity     | extracellular organelle      | 0.97                        | 0.78                     |
| 26 | Q14766     | LTBP1    | signaling receptor activity      | extracellular region part    | 0.98                        | 1.28                     |
| 27 | P99999     | CYCS     | hydrolase activity               | organelle envelope lumen     | 1.10                        | 1.33                     |
| 28 | P30084     | ECHS1    | catalytic activity               | intracellular organelle      | 1.16                        | 2.23                     |
| 29 | P11277     | SPTB     | cytoskeletal protein binding     | intracellular organelle      | 1.17                        | 1.08                     |
| 30 | P02760     | AMBP     | enzyme inhibitor activity        | intracellular organelle      | 1.18                        | 1.29                     |
| 31 | P69905     | HBA1     | oxygen transporter activity      | intracellular organelle      | 1.24                        | -0.62                    |
| 32 | P02790     | HPX      | cofactor transporter activity    | intracellular organelle      | 1.36                        | 0.69                     |
| 33 | P02671     | FGA      | protein binding                  | endoplasmic reticulum        | 1.43                        | 1.76                     |
| 34 | P02652     | APOA2    | cholesterol transporter activity | endoplasmic reticulum        | 1.44                        | 1.35                     |

|    |        |       |                            |                             |      |      |
|----|--------|-------|----------------------------|-----------------------------|------|------|
| 35 | P12259 | F5    | cation binding             | plasma membrane             | 1.53 | 1.71 |
| 36 | P02679 | FGG   | cation binding             | intracellular organelle     | 1.65 | 1.94 |
| 37 | P07996 | THBS1 | cytokine binding           | endoplasmic reticulum       | 1.65 | 2.61 |
| 38 | P02675 | FGB   | protein binding            | intracellular organelle     | 1.71 | 2.29 |
| 39 | P04275 | VWF   | glycoprotein binding       | endoplasmic reticulum       | 1.75 | 2.15 |
| 40 | P02749 | APOH  | enzyme regulator activity  | plasma lipoprotein particle | 1.82 | 2.97 |
| 41 | P02776 | PF4   | chemokine receptor binding | intracellular organelle     | 1.90 | 3.12 |
| 42 | Q13201 | MMRN1 | -                          | intracellular organelle     | 2.03 | 2.39 |
| 43 | P04003 | C4BPA | poly(A) RNA binding        | membrane                    | 2.24 | 1.43 |
| 44 | P02647 | APOA1 | enzyme activator activity  | endoplasmic reticulum       | 5.36 | 1.31 |

\*The corresponding function or loaction was not significantly mapped

1

Tab S2. 13 common differentially expressed proteins caused by storage temperature by Phosphorylation iTRAQ.

| NO | Uniprot ID | Genename | Founction                    | Location                   | Log <sub>2</sub> FoldChange |                    |
|----|------------|----------|------------------------------|----------------------------|-----------------------------|--------------------|
|    |            |          |                              |                            | 22°C 5d vs 22°C 0d          | 10°C 5d vs 22°C 0d |
| 1  | Q6VY07     | PACS1    | protein binding              | membrane-bounded organelle | 0.63                        | 0.69               |
| 2  | Q15555     | MAPRE2   | cytoskeletal protein binding | cytoskeleton               | 0.69                        | 1.26               |
| 3  | Q00013     | MPP1     | nucleotide kinase activity   | intracellular              | 0.70                        | 0.85               |
| 4  | Q12846     | STX4     | enzyme activator             | synaptic vesicle           | 0.76                        | 0.72               |
| 5  | P13861     | PRKAR2A  | kinase regulator activity    | plasma membrane region     | 0.81                        | 0.88               |
| 6  | O75396     | SEC22B   | syntaxin binding             | endoplasmic reticulum      | 0.82                        | 0.70               |
| 7  | Q16512     | PKN1     | protein binding              | intracellular organelle    | 0.86                        | 1.22               |
| 8  | P53621     | COPA     | protein binding              | organelle membrane         | 0.92                        | 0.75               |
| 9  | P24844     | MYL9     | cytoskeletal protein         | actin cytoskeleton         | 0.93                        | 0.78               |
| 10 | Q13442     | PDAP1    | nucleic acid binding         | -                          | 1.05                        | 0.86               |
| 11 | P08567     | PLEK     | protein kinase binding       | plasma membrane region     | 1.22                        | 1.62               |
| 12 | Q6ZTN6     | ANKRD13D | - *                          | membrane                   | 1.48                        | 1.00               |
| 13 | P37802     | TAGLN2   | cytoskeletal protein binding | extracellular organelle    | 1.52                        | 0.68               |

\*The corresponding function or loaction was not significantly mapped

2

3

4

1 *Figure S1*

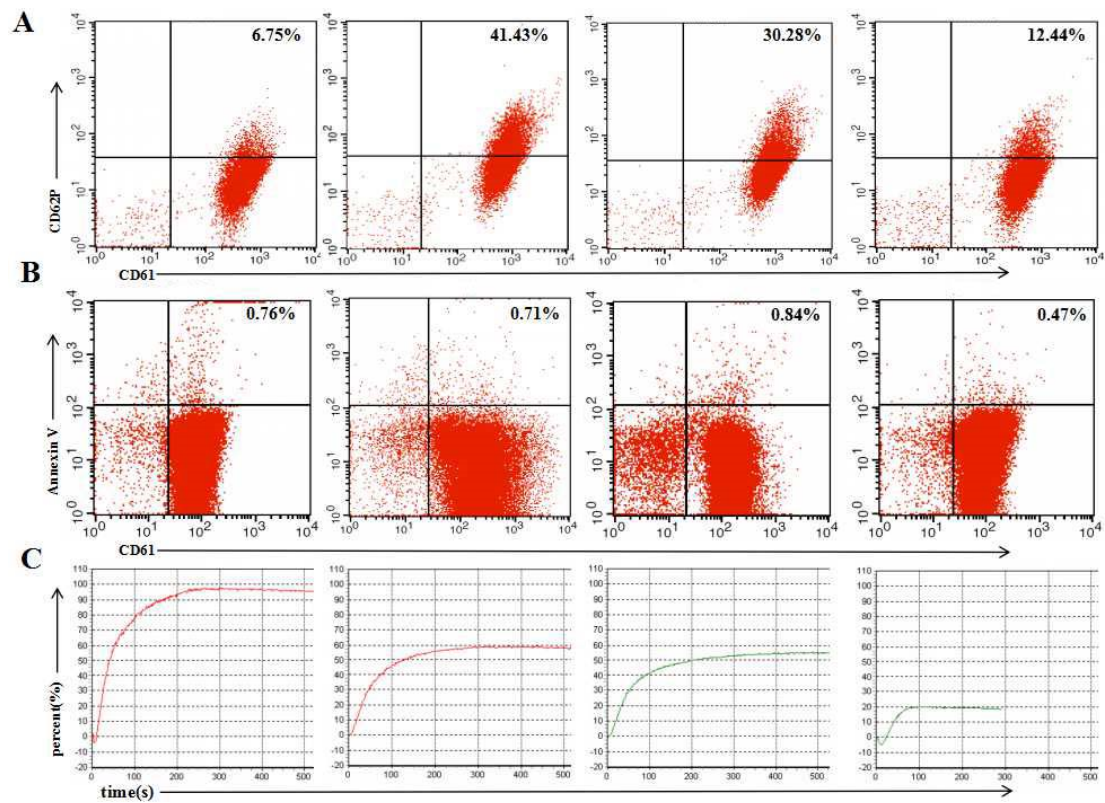

*Fig S1.* The Storage condition could affect the activation and aggregation of platelets. (A). CD62P surface expression as measured with flow cytometry. (B). PS exposure measured as Annexin V binding with flow cytometry. (C). The maximal aggregation of each group.

2

3 *Figure S2*

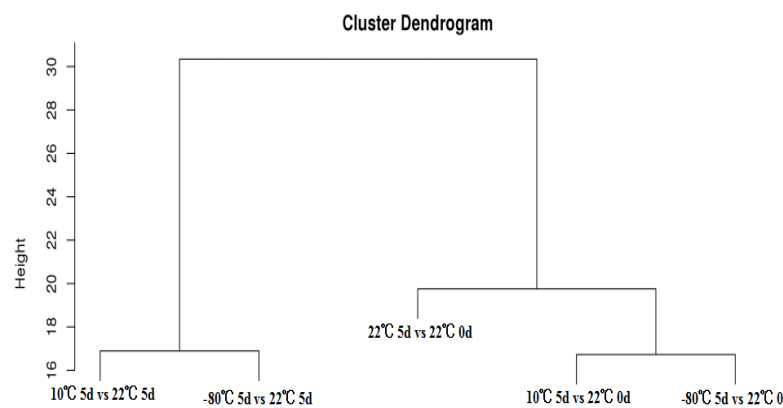

*Fig S2.* Hierarchical clustering analysis of differentially expressed proteins between groups

4

5

6

7

8

1 *Figure S3*

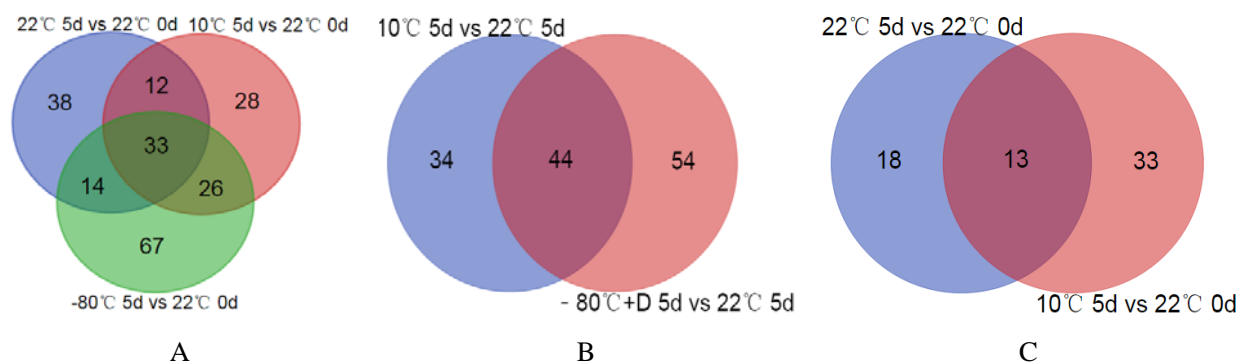

Fig S3. Venn diagram representing the overlap of the differentially expressed proteins by General iTRAQ (A,B) and by Phosphorylation iTRAQ (C). (A). Storage time caused 33 common differential proteins between 22°C 5d vs 22°C 0d, 10°C 5d vs 22°C 0d and -80°C+D 5d vs 22°C 0d. (B). Storage temperature caused 44 common differential proteins between 10°C 5d vs 22°C 5d, -80°C+D 5d vs 22°C 5d. (C). Storage time caused 13 common differential expression proteins by Phosphorylation of iTRAQ between 22°C 5d vs 22°C 0d, 10°C 5d vs 22°C 0d.

2

3





## Supplemental Methods

### *Protein extraction, quantization, digestion and iTRAQ labeling*

Platelet proteins was collected, and protein concentrations were measured using a MicroBCA protein assay kit (Pierce, Rockford, IL). For each sample, 100 µg of protein was dissolved in a dissolution buffer (AB Sciex, Foster City, CA, USA). After being volume metered (30 µL), alkylated and trypsin-digested (modified trypsin (Sigma, St. Louis, MO), 37°C), the samples were labeled following the manufacturer's instructions for the double iTRAQ Reagents 4-plex kit ((AB Sciex), group A-113, group B-114, C-115, D-116) and the phosphorylation iTRAQ Reagents 8-plex kit ((AB Sciex), group A-113, 114; group B-115, 116; group C-117, 118). Samples were each labeled with iTRAQ reagents with molecular masses of 113, 114, 115, 116, 117, and 118 Da.

### *Phosphopeptide enrichments and LC-MS analysis*

After labeling, all samples were mixed with TiO<sub>2</sub> phosphobind Buffer, and the phosphopeptides were enriched following the manufacturer's instructions of Phosphopeptides Enrichment Kit No. 539772. The enriched phosphopeptides were analyzed using a Triple TOF 5600 mass spectrometer (AB SCIEX, USA). Mass spectrometer data acquisition was performed with a Triple TOF 5600 System fitted with a Nanospray III source (AB SCIEX, USA) and a pulled quartz tip as the emitter (New Objectives, USA). Data were acquired using an ion spray voltage of 2.5 kV, curtain gas of 30 PSI, nebulizer gas of 5 PSI, and an interface heater temperature of 150°C. For information dependent acquisition (IDA), survey scans were acquired in

1 250 ms and as many as 35 product ion scans were collected if they exceeded a  
2 threshold of 150 counts per second (counts/s) with a 2+ to 5+ charge-state. The total  
3 cycle time was fixed to 2.5 s. A rolling collision energy setting was applied to all  
4 precursor ions for collision-induced dissociation (CID). Dynamic exclusion was set  
5 for Kof peak width (18 s), and the precursor was then refreshed off the exclusion list.

#### 6 *Protein Identification and Quantification*

7 The iTRAQ data were processed with Protein Pilot Software v.5.0 (AB SCIEX, USA)  
8 against the *Homo sapiens* database using the Paragon algorithm. Protein identification  
9 was performed with the search option of emphasis on biological modifications. The  
10 database search parameters were the following: the instrument was a TripleTOF 5600,  
11 iTRAQ quantification, cysteine modified with iodoacetamide, phosphorylation  
12 emphasis, biological modifications were selected as ID focus, and trypsin digestion.  
13 For false discovery rate (FDR) calculation, an automatic decoy database search  
14 strategy was employed to estimate the FDR using the PSPEP (Proteomics System  
15 Performance Evaluation Pipeline Software, integrated in the ProteinPilot Software).  
16 The FDR was calculated as the number of false positive matches divided by the  
17 number of total matches. Then, the iTRAQ was chosen for protein quantification with  
18 unique peptides during the search, and peptides with global FDR values less than 1%  
19 were considered for further analysis. Within each iTRAQ run, differentially expressed  
20 proteins were determined based on the ratios of differently labeled proteins. Finally,  
21 for differential expression analysis, fold change was calculated, and proteins with a  
22 fold change of 1.5 or 0.67 were considered to be significantly differentially expressed.

1 P value<0.05.
